# Supplementary material for: Characterization of the neural stem cell gene regulatory network identifies OLIG2 as a multifunctional regulator of self-renewal
Source: PubMed Central journal article supplement — Genome Res. 2015 Jan;25(1):41–56. doi: 10.1101/gr.173435.114 (PMC4317172; doi:10.1101/gr.173435.114), 2015-01

### A Self-renewing NS cells

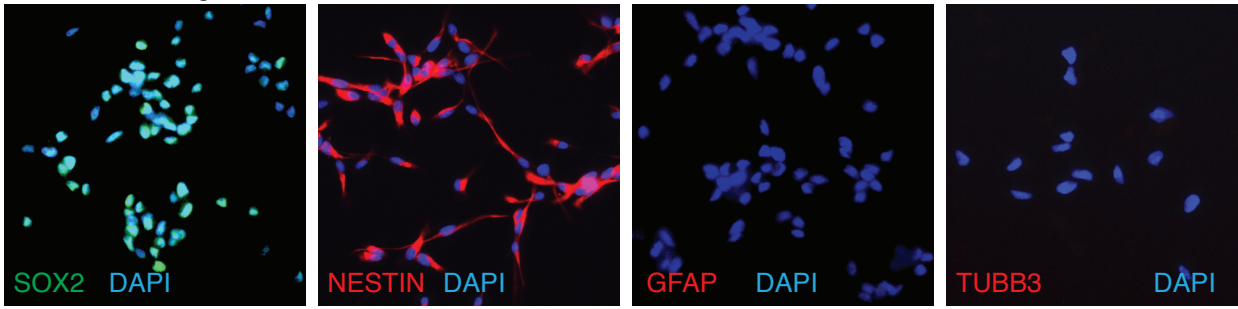

### B Neuronal differentiation      Astrocyte differentiation

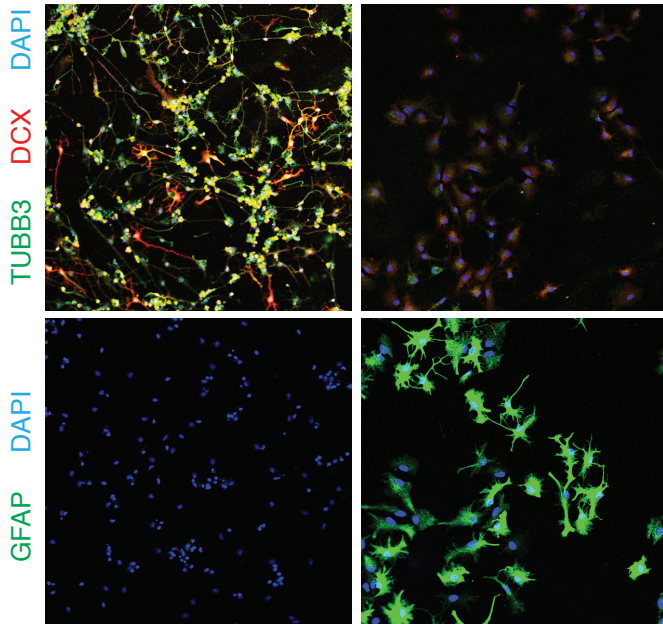

### C Validation of astrocyte array

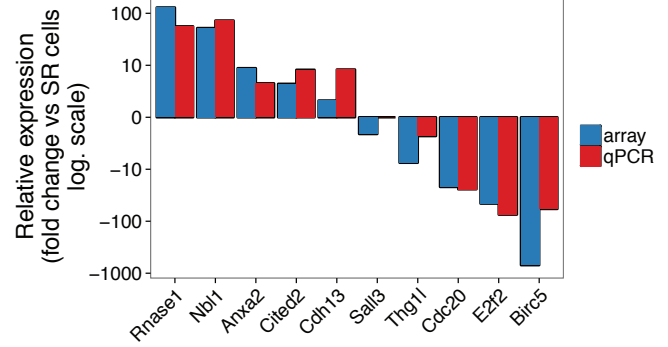

### D Validation of quiescence array

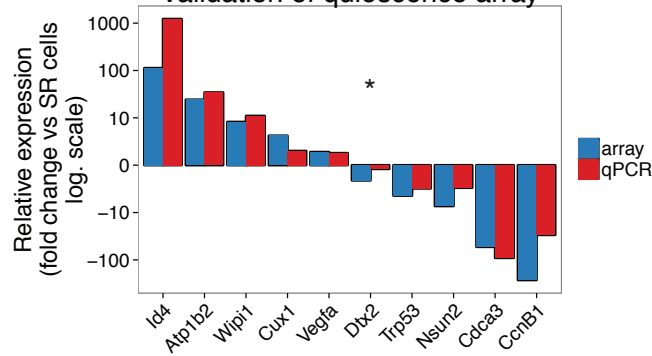

### E Validation of neuronal progenitor array

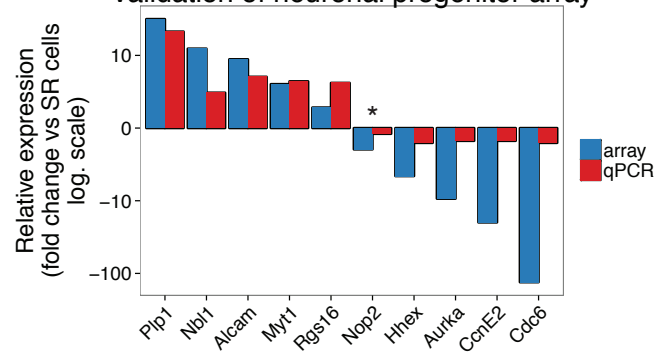

### F Induction of astrocytic genes

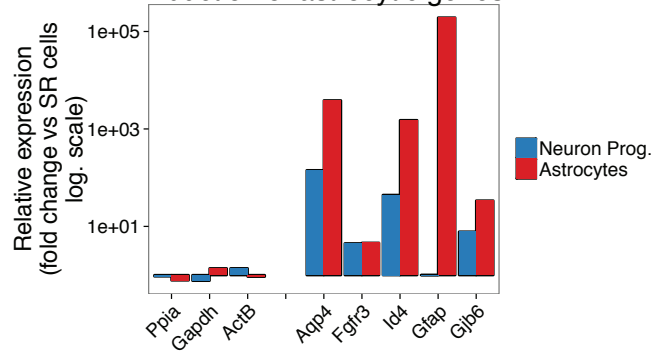

### G Induction of neuronal genes

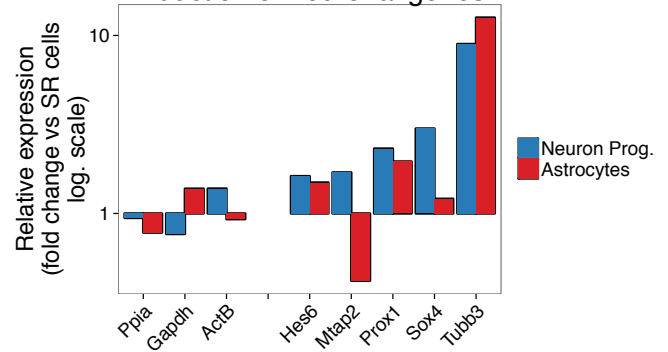

Supplement: supp_gr.173435.114_Supp_Fig1.pdf [file supp_gr.173435.114_Supp_Fig1.pdf]
