# Supplementary material for: Characterization of the neural stem cell gene regulatory network identifies OLIG2 as a multifunctional regulator of self-renewal
Source: HighWire-hosted journal article supplement (doi:10.1101/gr.173435.114), 2014-10-07
Supplement: TableS3.xlsx [file TableS3.xlsx]

## Sheet: Summary
	# peaks	# mapped reads
OLIG2	69839	24754002
ASCL1	4850	46572638
TCF3	14279	20063930
MAX	8672	21796532
NFI	33584	18808926
SOX2	24760	19354831
SOX9	14223	9730580
SOX21	5026	9566018
FOXO3	22590	11933054
CTCF	49949	28203252
SMC1A	41486	22454848
Input		27754470

## Sheet: OLIG2
chr1	3111454	3111849
chr1	3282666	3282874
chr1	3323879	3324113
chr1	3660724	3661030
chr1	4402560	4402921
chr1	4404328	4404528
chr1	4416983	4417233
chr1	4562033	4562268
chr1	4797821	4798392
chr1	4847523	4847793
chr1	4900784	4901087
chr1	4916372	4917038
chr1	4960605	4961095
chr1	4961268	4961548
chr1	5012598	5013869
chr1	5023317	5023594
chr1	5060530	5060751
chr1	5218734	5219292
chr1	5222357	5222540
chr1	5222847	5223382
chr1	5402562	5402861
chr1	6204940	6205240
chr1	6296759	6296985
chr1	6473525	6473714
chr1	6751427	6751613
chr1	7078917	7079555
chr1	7095108	7095599
chr1	7129277	7129575
chr1	7303459	7303929
chr1	7387752	7387942
chr1	7388096	7388276
chr1	9465182	9465367
chr1	9537922	9538432
chr1	9544058	9544977
chr1	9553483	9553694
chr1	9554305	9555000
chr1	9556136	9556714
chr1	9560234	9560749
chr1	9599550	9599730
chr1	9600614	9601040
chr1	9601688	9602068
chr1	9611655	9611974
chr1	9617250	9618389
chr1	9618492	9619160
chr1	9619905	9622035
chr1	9631351	9631705
chr1	9638910	9639916
chr1	9648972	9649398
chr1	9651245	9651578
chr1	9737733	9738127
chr1	9738333	9738583
chr1	9813522	9814036
chr1	9852639	9852907
chr1	9933766	9934412
chr1	10027841	10028058
chr1	10028212	10028503
chr1	10030027	10030377
chr1	10123892	10124123
chr1	10219018	10219284
chr1	10221584	10221880
chr1	10870566	10870746
chr1	11990619	11990967
chr1	12006797	12007136
chr1	12634706	12635071
chr1	12995198	12995527
chr1	13030379	13030786
chr1	13032471	13032830
chr1	13161193	13161548
chr1	13280279	13280633
chr1	13364012	13364211
chr1	13416420	13416692
chr1	13579091	13579295
chr1	13589243	13589734
chr1	13598804	13599071
chr1	13604648	13605152
chr1	13629770	13629990
chr1	13639750	13640393
chr1	13655232	13655386
chr1	13673022	13673570
chr1	13774577	13774849
chr1	13851122	13851485
chr1	13861065	13861253
chr1	13925960	13926608
chr1	13980367	13980566
chr1	13990982	13991375
chr1	13991600	13991779
chr1	13992649	13993030
chr1	14000962	14001187
chr1	14001594	14001902
chr1	14087877	14088292
chr1	14099128	14099418
chr1	14129875	14130302
chr1	14170218	14170717
chr1	14171324	14172201
chr1	14174197	14174827
chr1	14175456	14175661
chr1	14180193	14180427
chr1	14188950	14189464
chr1	14208729	14209356
chr1	14282014	14282923
chr1	14288820	14289068
chr1	14299610	14299854
chr1	14300259	14300557
chr1	14445856	14446103
chr1	14450538	14450718
chr1	14454901	14455127
chr1	14503644	14504352
chr1	14556567	14556814
chr1	14616874	14617148
chr1	14617343	14617577
chr1	14651965	14652224
chr1	14669604	14669931
chr1	14695530	14695721
chr1	15639939	15640125
chr1	15795914	15796424
chr1	15933810	15934083
chr1	15948781	15949100
chr1	16081738	16082194
chr1	16083210	16083574
chr1	16101574	16101754
chr1	16101879	16102220
chr1	16112775	16113279
chr1	16119914	16120784
chr1	16176090	16176301
chr1	16176699	16177287
chr1	16192222	16192519
chr1	16202496	16202986
chr1	16262254	16262616
chr1	16459470	16459819
chr1	16530893	16531079
chr1	16536774	16537003
chr1	16596949	16597204
chr1	16646960	16647188
chr1	16651570	16651750
chr1	16678507	16678946
chr1	16954560	16954846
chr1	16999786	17000027
chr1	17031320	17031587
chr1	17048987	17049195
chr1	17050033	17050380
chr1	17050701	17051080
chr1	17406088	17406363
chr1	17407021	17407419
chr1	17439343	17439768
chr1	17527680	17527913
chr1	17645857	17646122
chr1	17647449	17647940
chr1	17706322	17706537
chr1	17708582	17708790
chr1	17732139	17732352
chr1	17828484	17828851
chr1	18171373	18171553
chr1	19840133	19840408
chr1	20048349	20048740
chr1	20107642	20107984
chr1	20668165	20668441
chr1	20791875	20792064
chr1	20830078	20830300
chr1	20835827	20836072
chr1	20857357	20858011
chr1	20895595	20896223
chr1	20913096	20913336
chr1	20941492	20942000
chr1	20985415	20985730
chr1	20992775	20993109
chr1	21004500	21004925
chr1	21042486	21043442
chr1	21064210	21064710
chr1	21074760	21075219
chr1	21091292	21091653
chr1	21401342	21401998
chr1	21402319	21402600
chr1	21448944	21449124
chr1	21606789	21607040
chr1	21625616	21625806
chr1	21681919	21682163
chr1	21720119	21720433
chr1	21791129	21791362
chr1	21795042	21795553
chr1	21820141	21820608
chr1	21828719	21828901
chr1	21891428	21891699
chr1	22248596	22248793
chr1	22256627	22256986
chr1	22601714	22602027
chr1	22647466	22647660
chr1	23194788	23195095
chr1	23203053	23203233
chr1	23209408	23209864
chr1	23221440	23221987
chr1	23328183	23328680
chr1	23390203	23390408
chr1	23481483	23481706
chr1	23487755	23487935
chr1	23497570	23497810
chr1	23771647	23771994
chr1	23799546	23799898
chr1	23841729	23842094
chr1	23853015	23853617
chr1	23903968	23904170
chr1	23938160	23938453
chr1	24081212	24081594
chr1	24092886	24093407
chr1	24179663	24179857
chr1	24193940	24194135
chr1	24218850	24219239
chr1	24232776	24233475
chr1	24233796	24234259
chr1	24237181	24237850
chr1	24238314	24238691
chr1	24251827	24252080
chr1	24293239	24293463
chr1	24316916	24317096
chr1	24560352	24560572
chr1	25065540	25066066
chr1	25090509	25090817
chr1	25100506	25100800
chr1	25114121	25114531
chr1	25139221	25139509
chr1	25142516	25142731
chr1	25162244	25162538
chr1	25164571	25164764
chr1	25222892	25223195
chr1	25285449	25285663
chr1	25338352	25338609
chr1	25476270	25476789
chr1	25487305	25487654
chr1	25561156	25561515
chr1	25761092	25761444
chr1	25835650	25835869
chr1	25879043	25879289
chr1	25881348	25881854
chr1	25883592	25883840
chr1	25886770	25887114
chr1	25887373	25887561
chr1	25941295	25941493
chr1	25949160	25949642
chr1	25949815	25950190
chr1	28401027	28401322
chr1	30845956	30846233
chr1	30850386	30850605
chr1	30930756	30930972
chr1	31006721	31007133
chr1	31090720	31090949
chr1	31091511	31091812
chr1	31107216	31107396
chr1	31115896	31116263
chr1	31158380	31158961
chr1	31159813	31160171
chr1	31232301	31232574
chr1	31435942	31436196
chr1	33099103	33099892
chr1	33163229	33163554
chr1	33252017	33252364
chr1	33258715	33258904
chr1	33271644	33272115
chr1	33390958	33391294
chr1	33551732	33551980
chr1	33552444	33552874
chr1	33578842	33579097
chr1	33579291	33579489
chr1	33647982	33648195
chr1	33702582	33702761
chr1	33704103	33704318
chr1	33726488	33726668
chr1	33786444	33786959
chr1	33791343	33791642
chr1	33964192	33964528
chr1	33989686	33990292
chr1	34062247	34063084
chr1	34063163	34063462
chr1	34063959	34064135
chr1	34082778	34083018
chr1	34085309	34085717
chr1	34098364	34098630
chr1	34117252	34117432
chr1	34156370	34156664
chr1	34157252	34157469
chr1	34166490	34166901
chr1	34174683	34174904
chr1	34176899	34177268
chr1	34178433	34178907
chr1	34197567	34197892
chr1	34203686	34203996
chr1	34207290	34208035
chr1	34212146	34212396
chr1	34212971	34213344
chr1	34222812	34223226
chr1	34223869	34224980
chr1	34239530	34240111
chr1	34241232	34241492
chr1	34261768	34261948
chr1	34293136	34293667
chr1	34325405	34325687
chr1	34369150	34369433
chr1	34444136	34444696
chr1	34459439	34459690
chr1	34496634	34496875
chr1	34640373	34641281
chr1	34720550	34723765
chr1	34732528	34732908
chr1	34734938	34735151
chr1	34735678	34735933
chr1	34747390	34747692
chr1	34753394	34753850
chr1	34770750	34771136
chr1	34776824	34777404
chr1	34806105	34806337
chr1	34924160	34924376
chr1	35442339	35442593
chr1	35710317	35710607
chr1	35863654	35863855
chr1	35867984	35868813
chr1	35926450	35926691
chr1	35992113	35992323
chr1	36049078	36049349
chr1	36060550	36060796
chr1	36087200	36087794
chr1	36145209	36145506
chr1	36146025	36146237
chr1	36152351	36152720
chr1	36187160	36187414
chr1	36189982	36190229
chr1	36229855	36230092
chr1	36230294	36230714
chr1	36260747	36261073
chr1	36297098	36297395
chr1	36300720	36301344
chr1	36320835	36321304
chr1	36327531	36327844
chr1	36332503	36332886
chr1	36353402	36353610
chr1	36364748	36365101
chr1	36365373	36365598
chr1	36365953	36366968
chr1	36436481	36436736
chr1	36498190	36498370
chr1	36518876	36519062
chr1	36526688	36527077
chr1	36532274	36532716
chr1	36534934	36535518
chr1	36546664	36546912
chr1	36549176	36549543
chr1	36554037	36554517
chr1	36570214	36570492
chr1	36580352	36580867
chr1	36585097	36585729
chr1	36587953	36588133
chr1	36613266	36613821
chr1	36620766	36620957
chr1	36625531	36625716
chr1	36625877	36626057
chr1	36626709	36626895
chr1	36636679	36637614
chr1	36638181	36638426
chr1	36645217	36645620
chr1	36645773	36646752
chr1	36647364	36647822
chr1	36652386	36652644
chr1	36652958	36653344
chr1	36659863	36662070
chr1	36663809	36664404
chr1	36672021	36672485
chr1	36685048	36685228
chr1	36685418	36685902
chr1	36693046	36694086
chr1	36703172	36703500
chr1	36704464	36705160
chr1	36729919	36730239
chr1	36740991	36741253
chr1	36747958	36748473
chr1	36766783	36766967
chr1	36801292	36801593
chr1	36854395	36854664
chr1	36888087	36888415
chr1	36917400	36917665
chr1	36918416	36919017
chr1	36921595	36921944
chr1	36932419	36932599
chr1	36950056	36950280
chr1	36975813	36976084
chr1	36976678	36977512
chr1	36978298	36978531
chr1	36978778	36979101
chr1	36980345	36980532
chr1	37006250	37006978
chr1	37053451	37054104
chr1	37083857	37084069
chr1	37086045	37086225
chr1	37117791	37118327
chr1	37178979	37179708
chr1	37222938	37223219
chr1	37228086	37228370
chr1	37245003	37245240
chr1	37276876	37277367
chr1	37310354	37310560
chr1	37383331	37383511
chr1	37386617	37387086
chr1	37387527	37387744
chr1	37389586	37390059
chr1	37398836	37399021
chr1	37404067	37405008
chr1	37405741	37406076
chr1	37407649	37408177
chr1	37433640	37433961
chr1	37443347	37443656
chr1	37450095	37450331
chr1	37461908	37462276
chr1	37523560	37523792
chr1	37568773	37569699
chr1	37569855	37570312
chr1	37598161	37598341
chr1	37621804	37622616
chr1	37637779	37638037
chr1	37642539	37643353
chr1	37656501	37656778
chr1	37657617	37657869
chr1	37685550	37685823
chr1	37744543	37744740
chr1	37753505	37754117
chr1	37755907	37756087
chr1	37767057	37767435
chr1	37799150	37799360
chr1	37814328	37814516
chr1	37907649	37907849
chr1	37929091	37929307
chr1	37947164	37947501
chr1	37979548	37979761
chr1	38013573	38014273
chr1	38016409	38016993
chr1	38028439	38028667
chr1	38054783	38055211
chr1	38255199	38255687
chr1	38278877	38279433
chr1	38349827	38350185
chr1	38364747	38365336
chr1	38365641	38365872
chr1	38390955	38391489
chr1	38458741	38459095
chr1	38507350	38508063
chr1	38814610	38814915
chr1	38900102	38900529
chr1	38904850	38905300
chr1	38905585	38905781
chr1	38950330	38950653
chr1	39444426	39444677
chr1	39464095	39464275
chr1	39500768	39500961
chr1	39534799	39535038
chr1	39539454	39539634
chr1	39542693	39542977
chr1	39582730	39582910
chr1	39585865	39586056
chr1	39603136	39603367
chr1	39612738	39613261
chr1	39621493	39621814
chr1	39624744	39625276
chr1	39703090	39703428
chr1	39707592	39707843
chr1	39708679	39708935
chr1	39744014	39744393
chr1	39751589	39751931
chr1	39767504	39767783
chr1	39770526	39771973
chr1	39790907	39791687
chr1	39792508	39793480
chr1	39797716	39798180
chr1	39803625	39803918
chr1	39806447	39807354
chr1	39816110	39816793
chr1	39818002	39819355
chr1	39827247	39827535
chr1	39829113	39829995
chr1	39830566	39831391
chr1	39862106	39862860
chr1	39893309	39893493
chr1	39895449	39896288
chr1	39959430	39959933
chr1	39970304	39970559
chr1	39975333	39975857
chr1	39980142	39980849
chr1	39982969	39983195
chr1	39987905	39988228
chr1	39993331	39993664
chr1	39993791	39994187
chr1	39998453	39999050
chr1	39999479	40000136
chr1	40001281	40001902
chr1	40003376	40005183
chr1	40021811	40022131
chr1	40022205	40022615
chr1	40026622	40027233
chr1	40029208	40029594
chr1	40030793	40031119
chr1	40033879	40034652
chr1	40038841	40039189
chr1	40039725	40040058
chr1	40082580	40082966
chr1	40088143	40088486
chr1	40090713	40090955
chr1	40129125	40129340
chr1	40174285	40175029
chr1	40196556	40196858
chr1	40206150	40206491
chr1	40230990	40231265
chr1	40238498	40238678
chr1	40415135	40415471
chr1	40422116	40422350
chr1	40433660	40433858
chr1	40862379	40862570
chr1	40872517	40872746
chr1	40874586	40874933
chr1	40881308	40881729
chr1	40897432	40897690
chr1	40901461	40901719
chr1	40904534	40904797
chr1	40940585	40940788
chr1	40961525	40961838
chr1	41084276	41084949
chr1	41197203	41197704
chr1	41210272	41210498
chr1	41214496	41215398
chr1	41244729	41245008
chr1	41292860	41293063
chr1	41384035	41384272
chr1	41446434	41446648
chr1	41446903	41447741
chr1	41468556	41468926
chr1	41469075	41469251
chr1	41612508	41612825
chr1	41614281	41614587
chr1	41661871	41662255
chr1	41662436	41662987
chr1	41708654	41709206
chr1	41709521	41709867
chr1	41944985	41945462
chr1	42101044	42101269
chr1	42151591	42151790
chr1	42154541	42154732
chr1	42154900	42155129
chr1	42202420	42202827
chr1	42286571	42286820
chr1	42288136	42288327
chr1	42314663	42315123
chr1	42317476	42317733
chr1	42408811	42409136
chr1	42565100	42565617
chr1	42584405	42584788
chr1	42595329	42597555
chr1	42681678	42681947
chr1	42686712	42687136
chr1	42688242	42688422
chr1	42693414	42693752
chr1	42706317	42706497
chr1	42724584	42724766
chr1	42735443	42735769
chr1	42746990	42747287
chr1	42748336	42748834
chr1	42749078	42749365
chr1	42749980	42751404
chr1	42751683	42752705
chr1	42753295	42753597
chr1	42753877	42754388
chr1	42755107	42755436
chr1	42760703	42760991
chr1	42761262	42761469
chr1	42767869	42768289
chr1	42770209	42770575
chr1	42771075	42771546
chr1	42775481	42775654
chr1	42780681	42781074
chr1	42907644	42908279
chr1	42977653	42978060
chr1	43007277	43007538
chr1	43097913	43098130
chr1	43154972	43155435
chr1	43198357	43198737
chr1	43199759	43200100
chr1	43220716	43221270
chr1	43258708	43258922
chr1	43272516	43273069
chr1	43282552	43282987
chr1	43301938	43302163
chr1	43307143	43307443
chr1	43316746	43317114
chr1	43321334	43321699
chr1	43323575	43323794
chr1	43373836	43374729
chr1	43414934	43415618
chr1	43417480	43417961
chr1	43418111	43418654
chr1	43453065	43453910
chr1	43460183	43460379
chr1	43483474	43483658
chr1	43502075	43502306
chr1	43503530	43503989
chr1	43524490	43524888
chr1	43525107	43525287
chr1	43531143	43532388
chr1	43546061	43546472
chr1	43554725	43555167
chr1	43561012	43561227
chr1	43571210	43571428
chr1	43588082	43588555
chr1	43619003	43619215
chr1	43640378	43640860
chr1	43647527	43648096
chr1	43651462	43651802
chr1	43652245	43652758
chr1	43751524	43752335
chr1	43755302	43755984
chr1	43771700	43771936
chr1	43772916	43773380
chr1	43775697	43775904
chr1	43787162	43787833
chr1	43811424	43811723
chr1	43825258	43825579
chr1	43830683	43831332
chr1	43833107	43833430
chr1	43837924	43838339
chr1	43855298	43855499
chr1	43878500	43878769
chr1	43928127	43928361
chr1	43990299	43991350
chr1	44158142	44158658
chr1	44175439	44175712
chr1	44204629	44204925
chr1	44391142	44391601
chr1	44444924	44445257
chr1	44551538	44551792
chr1	44608861	44609358
chr1	44641832	44642434
chr1	44648421	44649028
chr1	44735897	44736139
chr1	44777909	44778093
chr1	45078101	45078380
chr1	45079054	45079605
chr1	45100000	45100322
chr1	45147996	45148433
chr1	45344864	45345081
chr1	45436877	45437057
chr1	45894423	45894969
chr1	45961937	45962610
chr1	45982659	45983062
chr1	46886875	46887220
chr1	46906602	46906821
chr1	46911366	46911546
chr1	50086722	50086902
chr1	50954584	50954920
chr1	50984172	50984623
chr1	51027865	51028084
chr1	51036211	51036549
chr1	51056757	51056948
chr1	51091187	51091514
chr1	51133040	51133535
chr1	51147253	51147582
chr1	51153722	51154006
chr1	51171443	51172138
chr1	51172643	51172857
chr1	51205490	51205674
chr1	51273081	51273741
chr1	51347380	51347985
chr1	51372421	51372648
chr1	51389864	51390274
chr1	51401019	51401314
chr1	51587118	51587508
chr1	51650961	51651196
chr1	51653933	51654116
chr1	51657232	51657539
chr1	51664223	51664771
chr1	51674262	51674963
chr1	51693548	51693918
chr1	51707187	51707486
chr1	51728275	51728592
chr1	51746793	51747022
chr1	51815531	51815885
chr1	51846134	51846314
chr1	51854478	51854838
chr1	51872184	51872395
chr1	51902292	51902472
chr1	51902538	51902744
chr1	51909162	51909532
chr1	51936149	51936790
chr1	51944954	51945200
chr1	51966053	51966355
chr1	51971693	51972228
chr1	51987405	51987664
chr1	51991405	51991563
chr1	52025951	52026239
chr1	52027112	52027388
chr1	52033443	52033847
chr1	52053041	52053289
chr1	52053473	52054363
chr1	52100072	52100287
chr1	52105706	52105911
chr1	52108492	52108807
chr1	52136562	52137167
chr1	52157429	52157744
chr1	52170547	52170836
chr1	52204692	52204976
chr1	52288760	52289014
chr1	52290011	52290423
chr1	52315324	52315664
chr1	52331087	52331285
chr1	52336800	52337031
chr1	52337093	52337499
chr1	52445100	52445317
chr1	52511549	52511823
chr1	52527810	52528256
chr1	52557610	52557917
chr1	52633812	52634105
chr1	52634921	52635690
chr1	52653937	52654999
chr1	52655322	52655657
chr1	52709761	52710060
chr1	52733513	52733784
chr1	52769819	52770469
chr1	52771237	52771529
chr1	52774943	52775555
chr1	52783436	52783645
chr1	52815087	52815403
chr1	52820758	52821160
chr1	52856175	52856510
chr1	52901502	52901682
chr1	52901905	52902354
chr1	52941214	52941451
chr1	53020072	53020255
chr1	53028754	53029020
chr1	53076956	53077145
chr1	53095174	53095405
chr1	53117369	53117710
chr1	53126655	53127054
chr1	53136709	53137044
chr1	53142905	53143162
chr1	53214575	53214939
chr1	53248064	53248457
chr1	53434382	53434751
chr1	53770142	53770447
chr1	53841463	53841657
chr1	53841839	53842094
chr1	53870888	53871288
chr1	53875244	53875482
chr1	53880523	53881302
chr1	53885748	53886434
chr1	53902861	53903126
chr1	53913583	53913888
chr1	53968788	53969141
chr1	53997068	53997408
chr1	54131370	54131610
chr1	54307509	54307784
chr1	54413456	54413793
chr1	54434388	54434659
chr1	54525685	54525882
chr1	54541573	54542188
chr1	54612319	54612553
chr1	54641253	54641556
chr1	54642316	54642913
chr1	54696606	54696856
chr1	54697113	54697293
chr1	54705088	54705339
chr1	54771459	54771634
chr1	54771976	54772636
chr1	54783546	54783766
chr1	54791693	54792214
chr1	54797891	54798465
chr1	54822532	54822733
chr1	54822913	54823199
chr1	54829727	54829918
chr1	54848288	54848545
chr1	54855294	54855474
chr1	54883536	54883983
chr1	54887081	54887515
chr1	54979355	54979961
chr1	55022430	55022858
chr1	55084191	55084381
chr1	55109167	55109440
chr1	55109925	55110230
chr1	55187784	55188257
chr1	55217862	55218427
chr1	55249701	55250041
chr1	55250215	55250547
chr1	55251968	55252457
chr1	55258641	55259233
chr1	55262751	55262992
chr1	55267199	55267554
chr1	55274132	55274390
chr1	55277982	55278446
chr1	55280857	55281165
chr1	55281867	55282091
chr1	55282322	55282754
chr1	55283398	55283676
chr1	55293906	55294278
chr1	55456747	55457099
chr1	55462498	55462741
chr1	55462849	55463149
chr1	55463509	55463720
chr1	55495147	55495385
chr1	55505319	55505589
chr1	55510900	55511587
chr1	55545780	55546739
chr1	55556755	55557048
chr1	55562763	55563090
chr1	55585464	55585923
chr1	55624653	55625032
chr1	55632764	55633311
chr1	55644931	55645290
chr1	55675410	55676153
chr1	55689601	55689881
chr1	55690228	55690437
chr1	55716690	55717210
chr1	55722718	55722967
chr1	55761671	55761903
chr1	55782306	55782637
chr1	55798818	55799292
chr1	55863896	55864372
chr1	55905713	55905946
chr1	55922043	55922386
chr1	55930991	55931303
chr1	55954891	55955137
chr1	56890079	56890573
chr1	56919767	56919947
chr1	56925374	56925623
chr1	57008624	57008886
chr1	57022214	57022411
chr1	57029946	57030443
chr1	57048505	57048698
chr1	57231213	57231410
chr1	57258863	57259043
chr1	57271229	57271434
chr1	57281377	57282144
chr1	57323645	57324394
chr1	57353165	57353412
chr1	57390752	57391022
chr1	57397894	57398359
chr1	57399263	57399524
chr1	57402236	57402416
chr1	57406047	57406227
chr1	57444637	57445168
chr1	57445368	57446059
chr1	57486494	57487316
chr1	57493858	57494179
chr1	57494336	57494574
chr1	57497657	57497848
chr1	57690711	57691338
chr1	57762947	57763161
chr1	57764749	57765110
chr1	57808684	57809106
chr1	57831137	57831332
chr1	57839211	57839616
chr1	57846600	57847223
chr1	57847377	57847553
chr1	57914709	57915069
chr1	57918760	57919352
chr1	57925457	57925839
chr1	57928680	57929099
chr1	57930869	57931161
chr1	57941704	57942143
chr1	57947048	57947545
chr1	57977552	57977915
chr1	58026993	58027231
chr1	58052577	58052813
chr1	58086403	58087025
chr1	58087159	58087961
chr1	58129360	58129563
chr1	58277978	58278272
chr1	58278533	58278785
chr1	58332832	58333018
chr1	58348857	58349066
chr1	58353210	58353542
chr1	58361135	58361612
chr1	58479773	58480016
chr1	58643015	58643342
chr1	58673096	58673324
chr1	58673989	58674210
chr1	58679196	58679500
chr1	58769389	58769748
chr1	58770322	58770551
chr1	58771215	58771462
chr1	58773013	58773559
chr1	59008949	59009125
chr1	59029664	59030438
chr1	59094673	59094887
chr1	59176944	59177188
chr1	59219505	59220229
chr1	59314696	59314882
chr1	59344732	59344990
chr1	59366007	59366335
chr1	59373565	59373817
chr1	59397971	59398173
chr1	59432939	59433483
chr1	59437899	59438197
chr1	59456381	59456574
chr1	59462226	59462479
chr1	59471472	59471825
chr1	59479685	59480372
chr1	59490854	59491334
chr1	59515291	59515484
chr1	59526093	59526340
chr1	59544717	59544897
chr1	59572766	59573670
chr1	59580856	59581365
chr1	59592350	59592579
chr1	59610788	59611046
chr1	59623552	59624151
chr1	59666711	59667040
chr1	59670762	59671048
chr1	59671928	59672118
chr1	59682245	59682631
chr1	59782247	59783017
chr1	59790885	59791301
chr1	59820275	59820465
chr1	59821628	59821843
chr1	59828589	59829006
chr1	59845888	59846307
chr1	59846725	59846951
chr1	59848682	59848937
chr1	59852202	59852542
chr1	59890495	59890915
chr1	59944191	59944539
chr1	59959495	59959793
chr1	60065649	60065958
chr1	60113273	60113460
chr1	60154794	60155046
chr1	60237047	60237464
chr1	60255855	60256049
chr1	60466350	60466617
chr1	60466942	60467128
chr1	60622084	60622390
chr1	60696409	60696589
chr1	60791861	60792194
chr1	60822545	60822795
chr1	60835425	60835605
chr1	60861048	60861253
chr1	60882694	60883188
chr1	60896057	60896260
chr1	60906728	60906917
chr1	60907939	60908333
chr1	60930147	60930458
chr1	60977416	60977866
chr1	61018038	61018238
chr1	61041451	61041631
chr1	61119162	61119355
chr1	61152762	61153019
chr1	61156558	61156991
chr1	61203119	61203582
chr1	61208665	61208882
chr1	61228808	61228988
chr1	61237344	61237546
chr1	61253526	61253744
chr1	61254948	61255885
chr1	61256043	61256236
chr1	61260092	61260484
chr1	61277986	61278320
chr1	61290858	61291718
chr1	61293427	61293722
chr1	61354925	61355277
chr1	61357279	61357578
chr1	61359304	61360027
chr1	61366332	61367139
chr1	61367617	61367879
chr1	61414162	61414342
chr1	61576808	61577176
chr1	61578116	61578544
chr1	61667495	61667894
chr1	61789431	61789786
chr1	61804638	61804989
chr1	61826557	61826930
chr1	61897111	61897361
chr1	61897831	61898081
chr1	61929197	61929377
chr1	61942624	61942999
chr1	61959458	61960026
chr1	61972189	61972461
chr1	62228316	62228708
chr1	62262249	62262961
chr1	62273705	62273996
chr1	62280600	62281221
chr1	62290764	62291109
chr1	62291196	62291486
chr1	62380786	62381133
chr1	62439523	62440005
chr1	62457970	62458430
chr1	62458588	62458861
chr1	62576583	62576835
chr1	62625536	62625908
chr1	62626592	62626889
chr1	62629077	62629360
chr1	62629476	62629888
chr1	62638144	62638768
chr1	62642088	62642394
chr1	62711674	62712068
chr1	62728952	62729400
chr1	62747626	62748094
chr1	62766771	62766986
chr1	62789636	62790421
chr1	62796259	62796638
chr1	62797857	62798291
chr1	62799847	62800246
chr1	62818615	62818801
chr1	62820875	62821216
chr1	62830289	62831026
chr1	62841193	62841834
chr1	62857795	62858080
chr1	62872591	62872881
chr1	62897934	62898200
chr1	62906135	62906478
chr1	62906916	62907850
chr1	62947966	62948368
chr1	62949199	62949442
chr1	62949614	62950007
chr1	62980598	62981180
chr1	62997955	62998413
chr1	63001852	63002207
chr1	63112190	63112499
chr1	63223130	63223475
chr1	63237416	63237900
chr1	63286395	63286708
chr1	63299589	63299900
chr1	63340550	63340829
chr1	63520307	63520487
chr1	63564409	63564685
chr1	63674743	63675222
chr1	63752393	63752998
chr1	63809871	63810967
chr1	63812591	63813026
chr1	63815765	63815945
chr1	63823930	63824132
chr1	63867272	63867788
chr1	63875083	63875388
chr1	63898344	63898607
chr1	63926019	63926273
chr1	63946882	63947110
chr1	63948867	63949223
chr1	63975817	63976233
chr1	63981492	63981713
chr1	63984227	63984561
chr1	64023552	64023793
chr1	64040790	64041123
chr1	64045585	64045765
chr1	64067192	64067517
chr1	64067645	64067832
chr1	64081587	64082377
chr1	64113355	64113910
chr1	64134470	64134809
chr1	64165759	64166649
chr1	64167690	64167844
chr1	64168093	64168529
chr1	64168729	64169133
chr1	64189236	64190023
chr1	64220041	64220842
chr1	64235936	64237058
chr1	64238188	64238429
chr1	64239395	64239668
chr1	64242245	64243172
chr1	64245405	64245779
chr1	64247217	64247662
chr1	64267047	64267597
chr1	64300621	64300965
chr1	64302740	64302933
chr1	64324705	64324877
chr1	64331113	64331420
chr1	64342125	64342644
chr1	64349383	64349916
chr1	64352051	64352539
chr1	64413403	64413915
chr1	64455881	64456061
chr1	64493093	64493309
chr1	64494681	64494933
chr1	64528563	64529234
chr1	64531852	64532050
chr1	64561661	64561830
chr1	64568671	64568928
chr1	64584380	64584700
chr1	64655867	64656110
chr1	64662098	64662303
chr1	64663721	64663932
chr1	64670346	64670778
chr1	64701713	64702423
chr1	64783599	64783781
chr1	64803927	64804128
chr1	64837954	64838293
chr1	64838574	64838921
chr1	64839646	64839812
chr1	64841666	64842779
chr1	64851825	64852214
chr1	64854296	64854697
chr1	64855666	64855936
chr1	64885838	64886280
chr1	64890969	64891149
chr1	64894695	64894914
chr1	64898832	64899134
chr1	64900182	64900852
chr1	64922243	64922423
chr1	64949292	64949664
chr1	64950071	64950347
chr1	64963503	64963892
chr1	64965291	64965686
chr1	65003137	65003534
chr1	65021991	65022324
chr1	65032766	65032946
chr1	65096464	65096676
chr1	65159714	65160005
chr1	65224926	65225136
chr1	65225411	65225964
chr1	65232796	65233221
chr1	65293342	65293760
chr1	66218660	66219262
chr1	66222623	66222865
chr1	66223352	66223634
chr1	66224251	66224700
chr1	66233584	66234199
chr1	66239580	66239790
chr1	66241767	66242383
chr1	66258032	66258438
chr1	66268092	66268448
chr1	66269939	66270222
chr1	66273018	66273929
chr1	66274750	66275240
chr1	66298581	66298937
chr1	66313034	66313285
chr1	66366896	66368017
chr1	66368138	66368787
chr1	66370100	66370280
chr1	66406473	66406732
chr1	66409992	66410298
chr1	66433274	66433871
chr1	66435117	66435617
chr1	66441661	66442295
chr1	66496030	66496287
chr1	66514563	66514910
chr1	66598970	66599331
chr1	66605030	66605442
chr1	66616250	66616690
chr1	66662453	66662633
chr1	66663907	66664200
chr1	66684627	66685223
chr1	66693505	66693685
chr1	66696770	66697075
chr1	66701639	66702351
chr1	66735912	66736337
chr1	66738246	66738488
chr1	66738910	66739805
chr1	66824467	66825095
chr1	66843276	66843788
chr1	66862562	66863037
chr1	66908461	66908693
chr1	66918154	66918498
chr1	67007432	67007725
chr1	67048125	67048306
chr1	67050160	67050459
chr1	67096509	67096706
chr1	67098348	67098569
chr1	67150019	67150660
chr1	67274659	67274858
chr1	67406350	67406755
chr1	67431988	67432338
chr1	67444249	67444940
chr1	67456256	67456554
chr1	67841709	67841956
chr1	67849041	67849445
chr1	67849813	67850333
chr1	68093692	68093972
chr1	68201946	68202122
chr1	68225059	68225652
chr1	68281697	68281966
chr1	68352516	68352757
chr1	68395857	68396081
chr1	68545367	68545680
chr1	68613359	68613602
chr1	68620449	68621014
chr1	68795626	68795840
chr1	68820013	68820359
chr1	68894051	68894283
chr1	68919226	68919536
chr1	68919615	68920139
chr1	68979932	68980242
chr1	69001973	69002538
chr1	69020270	69020647
chr1	69071476	69071827
chr1	69093229	69093409
chr1	69151541	69151945
chr1	69152165	69152369
chr1	69152545	69153778
chr1	69157724	69158028
chr1	69203955	69204289
chr1	69378346	69378526
chr1	69403706	69403886
chr1	69465668	69465885
chr1	69499503	69500001
chr1	69505245	69505692
chr1	69513458	69513647
chr1	69520823	69521070
chr1	69554113	69554317
chr1	69554746	69555114
chr1	69585295	69585540
chr1	69637893	69638236
chr1	69733683	69733871
chr1	69734302	69734578
chr1	69734741	69734933
chr1	69815522	69815718
chr1	69848071	69848364
chr1	69875492	69875899
chr1	69899993	69900473
chr1	70113791	70114284
chr1	70129919	70130145
chr1	70182194	70182419
chr1	70426264	70427008
chr1	70477017	70477276
chr1	70488952	70489176
chr1	70513450	70513763
chr1	70521862	70522151
chr1	70573724	70574023
chr1	70772176	70772401
chr1	70900011	70900273
chr1	70927083	70927383
chr1	70953902	70954236
chr1	70979741	70979969
chr1	71020431	71020650
chr1	71044054	71044524
chr1	71146593	71146837
chr1	71230709	71230935
chr1	71338534	71338930
chr1	71387973	71388202
chr1	71586914	71587522
chr1	71661503	71661868
chr1	71699077	71699415
chr1	71699953	71700136
chr1	71720108	71720584
chr1	71738781	71738958
chr1	71748066	71748255
chr1	71775723	71776180
chr1	71810101	71810330
chr1	71862144	71862531
chr1	71940255	71940545
chr1	71960059	71960239
chr1	71987349	71987623
chr1	71991738	71992062
chr1	72017502	72017694
chr1	72048966	72049422
chr1	72061183	72061627
chr1	72080246	72080427
chr1	72115522	72115964
chr1	72198040	72198262
chr1	72233883	72234518
chr1	72261237	72261596
chr1	72272915	72273750
chr1	72282871	72283292
chr1	72290299	72290525
chr1	72290954	72291334
chr1	72301679	72302677
chr1	72302879	72303440
chr1	72333398	72333784
chr1	72353595	72354144
chr1	72426386	72426691
chr1	72429677	72430003
chr1	72430298	72430582
chr1	72460739	72461129
chr1	72536888	72537138
chr1	72557806	72557993
chr1	72582758	72583025
chr1	72583366	72583822
chr1	72605270	72605836
chr1	72639900	72640392
chr1	72645704	72646076
chr1	72719608	72719983
chr1	72763625	72763811
chr1	72766561	72767480
chr1	72770984	72771269
chr1	72783137	72783417
chr1	72785454	72786024
chr1	72786140	72786834
chr1	72793016	72793352
chr1	72797879	72798346
chr1	72861722	72862378
chr1	72871988	72872200
chr1	72872896	72873830
chr1	72874330	72874738
chr1	72876367	72876971
chr1	72879200	72880091
chr1	72886190	72886348
chr1	72900780	72901045
chr1	72905369	72905887
chr1	72911061	72911326
chr1	72912480	72912870
chr1	72916105	72916286
chr1	72921306	72921624
chr1	72922737	72923039
chr1	72953651	72953832
chr1	72961452	72961753
chr1	72977451	72977694
chr1	72988277	72988461
chr1	72998384	72998837
chr1	73016021	73016343
chr1	73017134	73017314
chr1	73037501	73037751
chr1	73051381	73051824
chr1	73052734	73052991
chr1	73092475	73092757
chr1	73101766	73102064
chr1	73106739	73107146
chr1	73110979	73111308
chr1	73135105	73135394
chr1	73163115	73163514
chr1	73175710	73175890
chr1	73187008	73187701
chr1	73199923	73200500
chr1	73215812	73216403
chr1	73217193	73217445
chr1	73222390	73222570
chr1	73235348	73235624
chr1	73288684	73289244
chr1	73290401	73290898
chr1	73317109	73318046
chr1	73319098	73319341
chr1	73319652	73319930
chr1	73331977	73332375
chr1	73464611	73465128
chr1	73544562	73544834
chr1	73560451	73560764
chr1	73577181	73577361
chr1	73588035	73588216
chr1	73594462	73594681
chr1	73617612	73617859
chr1	73687145	73688040
chr1	73689143	73689683
chr1	73690266	73690574
chr1	73720041	73720392
chr1	73749031	73749474
chr1	73768210	73768958
chr1	73772014	73772247
chr1	73790366	73791479
chr1	73811594	73811798
chr1	73817244	73817650
chr1	73827896	73828248
chr1	73834156	73834689
chr1	73845655	73845878
chr1	73867032	73867802
chr1	73870891	73871774
chr1	73872926	73873138
chr1	73873733	73874054
chr1	73875628	73876071
chr1	73891762	73892060
chr1	73896875	73897669
chr1	73908982	73909653
chr1	73910882	73911340
chr1	73949036	73949564
chr1	73949709	73949936
chr1	73988760	73989352
chr1	73990186	73990492
chr1	73990652	73991601
chr1	74002324	74002496
chr1	74009540	74010686
chr1	74013077	74013354
chr1	74015854	74016098
chr1	74020493	74021004
chr1	74025846	74026193
chr1	74034560	74034753
chr1	74037890	74038187
chr1	74044604	74046126
chr1	74062527	74062707
chr1	74063420	74063619
chr1	74073988	74074731
chr1	74075213	74075881
chr1	74077418	74077871
chr1	74079727	74079926
chr1	74081347	74081562
chr1	74091050	74091343
chr1	74138373	74138756
chr1	74141053	74141555
chr1	74145212	74145487
chr1	74150205	74150448
chr1	74156256	74156527
chr1	74157519	74158697
chr1	74158939	74159276
chr1	74160451	74160740
chr1	74165705	74166174
chr1	74208108	74208486
chr1	74213787	74214048
chr1	74214710	74214897
chr1	74254618	74254877
chr1	74318312	74318492
chr1	74330684	74330963
chr1	74335973	74336216
chr1	74339320	74339636
chr1	74341622	74342911
chr1	74345647	74345874
chr1	74350114	74350585
chr1	74363817	74364443
chr1	74378910	74379491
chr1	74383621	74384003
chr1	74386956	74387291
chr1	74389945	74390249
chr1	74401519	74401707
chr1	74404166	74404487
chr1	74423030	74423290
chr1	74433471	74433685
chr1	74438083	74438347
chr1	74443835	74444238
chr1	74465633	74466476
chr1	74585129	74585679
chr1	74588775	74589583
chr1	74590658	74591085
chr1	74631683	74631921
chr1	74634840	74635078
chr1	74647778	74648164
chr1	74750782	74751129
chr1	74806471	74806652
chr1	74822196	74822720
chr1	74844023	74844540
chr1	74854370	74855020
chr1	74871290	74871851
chr1	74938130	74938345
chr1	75032000	75032377
chr1	75068947	75069143
chr1	75121120	75121428
chr1	75138944	75139219
chr1	75175871	75177107
chr1	75207279	75207535
chr1	75231096	75231547
chr1	75232978	75233242
chr1	75244647	75245102
chr1	75247070	75247392
chr1	75259747	75260007
chr1	75279671	75279864
chr1	75285984	75286241
chr1	75319103	75319295
chr1	75335829	75336179
chr1	75354025	75354258
chr1	75366893	75367255
chr1	75377755	75378041
chr1	75395351	75395641
chr1	75396338	75397083
chr1	75407571	75407843
chr1	75432093	75432669
chr1	75439589	75439787
chr1	75440112	75440322
chr1	75444461	75444866
chr1	75448492	75448764
chr1	75452574	75452881
chr1	75455954	75456339
chr1	75464209	75464389
chr1	75470714	75470966
chr1	75475973	75476183
chr1	75484486	75484751
chr1	75502205	75502418
chr1	75502542	75502843
chr1	75503061	75503364
chr1	75518014	75518202
chr1	75556045	75556391
chr1	75569424	75569668
chr1	75585428	75585863
chr1	75650220	75650738
chr1	75795355	75795640
chr1	76035677	76035948
chr1	76279874	76280161
chr1	76430043	76430224
chr1	76532215	76532492
chr1	76818758	76819092
chr1	76863129	76863467
chr1	76939206	76939741
chr1	77024205	77024740
chr1	77040324	77040884
chr1	77059002	77059326
chr1	77069615	77069956
chr1	77071552	77072326
chr1	77081564	77081833
chr1	77089899	77090509
chr1	77107093	77107408
chr1	77124783	77125007
chr1	77125095	77125371
chr1	77139638	77139862
chr1	77202002	77202222
chr1	77216645	77216943
chr1	77223199	77223637
chr1	77256295	77256776
chr1	77367559	77367905
chr1	77374105	77374434
chr1	77377575	77377841
chr1	77388359	77388694
chr1	77399196	77399541
chr1	77400875	77401161
chr1	77406702	77407321
chr1	77423569	77423925
chr1	77438129	77438309
chr1	77467627	77468024
chr1	77493356	77493928
chr1	77494104	77494450
chr1	77511058	77511470
chr1	77512575	77513111
chr1	77750975	77751170
chr1	77770233	77770412
chr1	78168314	78168532
chr1	78212410	78212677
chr1	78334876	78335150
chr1	78351785	78352322
chr1	78363546	78363851
chr1	78368247	78368582
chr1	78370503	78370748
chr1	78375318	78375498
chr1	78533424	78533637
chr1	78534001	78534702
chr1	78545629	78546076
chr1	78564457	78565215
chr1	78587176	78587555
chr1	78590376	78590718
chr1	78645889	78646249
chr1	78653985	78654582
chr1	78722409	78722848
chr1	78737318	78737654
chr1	78741662	78742497
chr1	78757519	78758281
chr1	78778518	78778776
chr1	78786316	78786735
chr1	78816278	78816508
chr1	78818635	78818910
chr1	78819090	78819298
chr1	78842283	78842602
chr1	78848913	78849894
chr1	78860492	78860809
chr1	79011505	79011686
chr1	79449062	79449277
chr1	79450595	79450980
chr1	79461298	79461551
chr1	79503493	79503785
chr1	79577805	79578273
chr1	79586898	79587323
chr1	79588776	79588956
chr1	79595292	79595826
chr1	79652397	79652672
chr1	79664185	79664365
chr1	79693972	79694335
chr1	79707937	79708162
chr1	79758230	79758447
chr1	79799659	79799865
chr1	79803484	79804014
chr1	79819709	79820330
chr1	79821071	79821291
chr1	79829275	79829821
chr1	79853288	79853500
chr1	79855248	79855485
chr1	79857036	79857674
chr1	79857823	79858364
chr1	79871321	79871665
chr1	79881741	79882018
chr1	79903192	79903387
chr1	79914341	79914634
chr1	79943195	79943525
chr1	79952684	79953026
chr1	80014997	80015656
chr1	80018523	80018777
chr1	80058244	80058575
chr1	80088037	80088218
chr1	80112527	80112812
chr1	80156235	80156576
chr1	80217679	80218050
chr1	80221340	80222302
chr1	80232781	80232991
chr1	80233629	80234059
chr1	80235145	80235613
chr1	80257052	80257303
chr1	80336356	80336550
chr1	80359594	80359842
chr1	80368638	80368908
chr1	80380786	80381139
chr1	80456195	80456397
chr1	80483001	80483273
chr1	80555194	80555443
chr1	80600885	80601263
chr1	80627039	80627578
chr1	80633391	80634407
chr1	80648509	80649359
chr1	80652904	80653346
chr1	80661460	80661677
chr1	80705838	80706213
chr1	80706755	80707030
chr1	80707552	80707820
chr1	80724926	80725106
chr1	80727131	80727600
chr1	80734471	80734719
chr1	80753515	80753807
chr1	80803580	80803857
chr1	80849383	80849783
chr1	80850776	80851428
chr1	81039697	81040091
chr1	81093752	81094146
chr1	81216410	81216861
chr1	81263212	81263448
chr1	81277493	81278060
chr1	81370381	81370564
chr1	81517585	81517785
chr1	81518783	81519093
chr1	81519558	81519958
chr1	81628881	81629109
chr1	81649514	81649739
chr1	81682608	81682788
chr1	81741031	81741542
chr1	81847337	81847591
chr1	81883439	81884025
chr1	81963999	81964246
chr1	82005096	82005372
chr1	82040639	82040881
chr1	82089848	82090032
chr1	82126633	82126860
chr1	82141776	82142050
chr1	82147248	82147840
chr1	82179415	82179789
chr1	82186003	82186389
chr1	82188272	82188475
chr1	82196530	82196802
chr1	82225505	82225772
chr1	82239820	82240260
chr1	82254013	82254458
chr1	82254848	82255587
chr1	82257834	82258128
chr1	82258836	82259187
chr1	82279250	82279930
chr1	82282460	82282651
chr1	82283121	82283335
chr1	82287509	82287781
chr1	82317021	82317205
chr1	82318042	82318377
chr1	82320713	82321333
chr1	82326353	82326715
chr1	82351247	82351462
chr1	82355002	82355773
chr1	82371551	82371736
chr1	82380667	82381139
chr1	82381701	82381903
chr1	82382297	82382858
chr1	82425528	82426130
chr1	82470950	82471265
chr1	82473201	82473809
chr1	82552332	82552732
chr1	82553343	82553583
chr1	82593788	82594025
chr1	82605493	82605812
chr1	82630961	82631473
chr1	82828113	82828891
chr1	82841299	82841531
chr1	83063956	83064262
chr1	83097702	83098001
chr1	83773804	83774079
chr1	83793491	83793735
chr1	83903131	83904183
chr1	83959322	83959548
chr1	83999349	83999601
chr1	84062704	84063034
chr1	84151674	84152437
chr1	84166958	84167138
chr1	84173490	84174013
chr1	84183718	84183902
chr1	84214431	84214792
chr1	84215108	84215488
chr1	84250241	84250757
chr1	84251225	84251462
chr1	84279621	84279953
chr1	84283602	84283782
chr1	84321693	84322235
chr1	84349970	84350170
chr1	84356700	84357066
chr1	84382430	84382859
chr1	84383130	84383496
chr1	84384114	84384715
chr1	84403549	84403743
chr1	84415494	84415698
chr1	84416023	84416287
chr1	84440261	84440546
chr1	84461269	84461807
chr1	84481597	84482025
chr1	84503323	84503512
chr1	84519581	84519821
chr1	84581851	84582468
chr1	84609752	84609937
chr1	84617757	84618434
chr1	84660974	84661734
chr1	84664340	84664569
chr1	84691297	84691852
chr1	84692264	84692583
chr1	84837007	84837308
chr1	84907146	84907510
chr1	84932267	84932597
chr1	87592169	87592566
chr1	87616682	87617329
chr1	87639440	87639749
chr1	87675736	87676072
chr1	87748593	87748844
chr1	87753981	87754203
chr1	87795743	87796133
chr1	87797653	87797835
chr1	87798378	87799225
chr1	87813055	87814047
chr1	87818237	87819591
chr1	87824666	87825412
chr1	87827675	87828050
chr1	87829864	87830882
chr1	87836564	87837218
chr1	87866088	87866400
chr1	87876606	87876957
chr1	87878580	87878942
chr1	87904413	87904663
chr1	87928633	87929589
chr1	87935256	87935749
chr1	87935896	87936097
chr1	87949692	87950687
chr1	87951501	87951951
chr1	88008436	88008724
chr1	88051183	88051368
chr1	88095669	88096047
chr1	88126088	88126539
chr1	88153849	88154213
chr1	88172075	88172385
chr1	88188823	88189003
chr1	88190984	88191348
chr1	88191598	88191786
chr1	88275876	88276516
chr1	88317532	88318065
chr1	88330590	88332492
chr1	88335122	88335693
chr1	88339059	88339373
chr1	88344957	88345275
chr1	88367286	88367466
chr1	88388625	88388951
chr1	88395177	88395506
chr1	88396446	88396766
chr1	88397786	88398203
chr1	88400472	88401206
chr1	88402029	88402484
chr1	88405916	88406537
chr1	88407310	88408075
chr1	88422923	88423198
chr1	88425346	88425713
chr1	88427477	88427686
chr1	88483563	88483761
chr1	88552370	88553424
chr1	88553703	88554047
chr1	88566164	88566520
chr1	88601785	88602385
chr1	88637317	88637572
chr1	88639332	88639859
chr1	88642338	88642699
chr1	88755429	88755741
chr1	88755875	88756094
chr1	88770106	88770690
chr1	88842779	88843061
chr1	88882219	88882455
chr1	88890742	88890952
chr1	88907129	88907556
chr1	88909186	88909565
chr1	88910245	88910938
chr1	88920119	88920376
chr1	88925420	88926148
chr1	88932098	88932958
chr1	88937147	88937420
chr1	89039028	89039356
chr1	89068045	89068225
chr1	89071156	89071516
chr1	89072346	89072896
chr1	89075598	89075847
chr1	89102090	89102390
chr1	89140813	89141099
chr1	89159970	89160234
chr1	89169976	89170701
chr1	89210416	89210822
chr1	89212511	89212755
chr1	89213256	89213600
chr1	89285752	89285932
chr1	89293467	89293735
chr1	89354445	89354998
chr1	89368606	89369080
chr1	89417562	89417851
chr1	89470911	89471098
chr1	89471368	89471869
chr1	89477457	89477609
chr1	89504070	89504820
chr1	89511153	89511344
chr1	89518087	89518997
chr1	89519428	89519770
chr1	89547547	89547749
chr1	89581389	89581642
chr1	89596750	89596930
chr1	89614605	89614855
chr1	89682170	89683551
chr1	89689138	89689347
chr1	89726516	89726957
chr1	89743274	89744114
chr1	89744458	89744708
chr1	89745275	89745610
chr1	89751170	89751397
chr1	89753523	89753693
chr1	89759273	89759536
chr1	89776262	89777194
chr1	89787637	89787817
chr1	89788152	89788777
chr1	89789063	89789388
chr1	89805719	89805899
chr1	89826276	89826858
chr1	89879051	89879415
chr1	90158963	90159361
chr1	90173472	90174335
chr1	90218736	90219037
chr1	90257675	90258208
chr1	90329243	90329449
chr1	90359014	90359489
chr1	90371021	90371477
chr1	90374570	90375441
chr1	90403903	90404148
chr1	90422739	90422998
chr1	90436428	90436790
chr1	90455880	90456118
chr1	90458996	90459287
chr1	90488624	90488924
chr1	90519748	90519976
chr1	90520043	90520470
chr1	90536023	90536235
chr1	90539986	90540342
chr1	90552773	90553160
chr1	90554447	90555697
chr1	90557214	90557460
chr1	90565455	90565789
chr1	90595641	90595939
chr1	90596691	90597217
chr1	90599010	90599190
chr1	90601705	90602034
chr1	90602384	90602795
chr1	90604165	90604570
chr1	90605315	90605608
chr1	90649053	90649307
chr1	90654395	90654839
chr1	90691436	90692434
chr1	90706002	90706810
chr1	90723900	90724208
chr1	90735130	90735522
chr1	90736034	90737209
chr1	90787737	90787931
chr1	90813082	90813263
chr1	90820655	90821404
chr1	90824816	90825029
chr1	90833928	90834203
chr1	90843424	90843673
chr1	90860709	90860875
chr1	90885155	90885335
chr1	90917330	90917614
chr1	90937776	90938277
chr1	90966110	90966428
chr1	90966560	90966897
chr1	90983212	90983548
chr1	90989033	90989568
chr1	90998818	90999742
chr1	91000696	91001599
chr1	91002501	91002708
chr1	91004206	91004426
chr1	91004816	91005214
chr1	91009379	91009603
chr1	91016866	91017330
chr1	91027250	91027445
chr1	91028404	91028741
chr1	91032483	91033257
chr1	91033557	91034722
chr1	91035016	91035311
chr1	91067811	91068352
chr1	91124881	91125529
chr1	91129801	91129981
chr1	91131901	91132378
chr1	91148392	91148817
chr1	91165436	91165616
chr1	91168344	91168626
chr1	91198852	91199246
chr1	91212480	91212647
chr1	91219279	91219527
chr1	91240073	91240259
chr1	91296833	91297911
chr1	91303002	91303228
chr1	91309511	91310066
chr1	91311841	91312163
chr1	91317162	91317673
chr1	91320494	91320792
chr1	91321062	91321594
chr1	91326780	91327237
chr1	91359878	91360061
chr1	91364072	91364353
chr1	91371549	91371798
chr1	91386161	91386384
chr1	91387723	91388125
chr1	91395398	91395618
chr1	91406428	91407360
chr1	91410507	91410796
chr1	91414051	91414903
chr1	91417768	91418096
chr1	91418183	91418363
chr1	91418518	91418912
chr1	91446657	91447080
chr1	91451568	91451879
chr1	91454708	91455009
chr1	91462035	91462216
chr1	91463174	91463435
chr1	91472077	91472501
chr1	91472831	91473089
chr1	91473444	91473974
chr1	91483839	91484155
chr1	91499343	91499644
chr1	91510656	91510836
chr1	91513905	91514210
chr1	91540737	91541060
chr1	91553089	91553918
chr1	91585360	91585918
chr1	91605150	91605465
chr1	91614782	91614977
chr1	91615274	91615776
chr1	91625182	91625420
chr1	91744710	91745055
chr1	91755648	91756057
chr1	91756667	91757350
chr1	91762437	91762673
chr1	91767077	91767722
chr1	91772908	91773564
chr1	91776821	91777899
chr1	91783869	91784296
chr1	91788905	91789184
chr1	91789333	91789579
chr1	91789654	91789834
chr1	91809011	91809265
chr1	91831173	91831757
chr1	91867919	91868224
chr1	91900908	91901269
chr1	92050017	92050217
chr1	92060954	92061320
chr1	92101805	92102229
chr1	92105725	92105950
chr1	92111548	92111779
chr1	92124450	92125388
chr1	92129073	92129428
chr1	92175655	92176013
chr1	92181910	92182090
chr1	92185410	92185698
chr1	92186421	92188103
chr1	92233716	92234142
chr1	92238934	92239284
chr1	92267175	92267379
chr1	92337935	92338122
chr1	92371593	92372003
chr1	92401883	92402228
chr1	92495793	92496150
chr1	92510954	92511169
chr1	92547348	92547623
chr1	92549097	92549435
chr1	92566982	92567186
chr1	92629384	92629818
chr1	92630638	92631018
chr1	92645166	92645529
chr1	92650881	92651061
chr1	92672019	92672762
chr1	92811734	92812195
chr1	92822535	92823068
chr1	92825178	92825358
chr1	92863991	92864693
chr1	92869294	92871120
chr1	92895297	92895461
chr1	92895950	92896227
chr1	92913699	92914021
chr1	92935194	92936038
chr1	92939743	92939941
chr1	92945992	92946278
chr1	92949412	92950171
chr1	92950323	92950864
chr1	92952202	92952742
chr1	92957653	92958131
chr1	92958745	92959430
chr1	92961486	92962177
chr1	92973601	92973874
chr1	92992950	92993134
chr1	92995306	92995832
chr1	93073147	93073841
chr1	93075699	93075979
chr1	93077333	93077732
chr1	93077826	93078305
chr1	93078470	93079045
chr1	93088469	93088740
chr1	93103006	93103255
chr1	93103412	93104027
chr1	93104469	93104649
chr1	93105489	93107067
chr1	93107544	93109030
chr1	93112646	93112944
chr1	93135831	93136068
chr1	93144819	93145030
chr1	93146450	93146821
chr1	93148680	93148873
chr1	93240587	93240963
chr1	93295479	93295750
chr1	93309766	93310141
chr1	93310424	93311712
chr1	93333064	93333519
chr1	93352293	93353442
chr1	93354283	93355383
chr1	93355977	93356165
chr1	93380405	93380657
chr1	93422383	93422834
chr1	93437038	93437348
chr1	93454188	93454454
chr1	93457986	93458239
[truncated: 67,839 more rows]

## Sheet: ASCL1
chr1	4916533	4916534
chr1	7799044	7799045
chr1	9554730	9554731
chr1	14171486	14171487
chr1	20048462	20048463
chr1	20941771	20941772
chr1	22067745	22067746
chr1	22346445	22346446
chr1	27776187	27776188
chr1	32485087	32485088
chr1	33099452	33099453
chr1	33932809	33932810
chr1	34537024	34537025
chr1	34640946	34640947
chr1	35885201	35885202
chr1	36087523	36087524
chr1	36588061	36588062
chr1	36637054	36637055
chr1	36693540	36693541
chr1	37179321	37179322
chr1	37277010	37277011
chr1	38263160	38263161
chr1	38279263	38279264
chr1	39806671	39806672
chr1	39895842	39895843
chr1	40004787	40004788
chr1	41447181	41447182
chr1	41662823	41662824
chr1	42595537	42595538
chr1	42907933	42907934
chr1	43755545	43755546
chr1	43796277	43796278
chr1	48466026	48466027
chr1	49502873	49502874
chr1	51027889	51027890
chr1	52775090	52775091
chr1	53886152	53886153
chr1	54541924	54541925
chr1	55247424	55247425
chr1	55283319	55283320
chr1	55511184	55511185
chr1	55580973	55580974
chr1	56890350	56890351
chr1	57281790	57281791
chr1	57444917	57444918
chr1	57690999	57691000
chr1	57846749	57846750
chr1	59491155	59491156
chr1	59573173	59573174
chr1	61291129	61291130
chr1	61291414	61291415
chr1	62786542	62786543
chr1	64067333	64067334
chr1	64236167	64236168
chr1	64242710	64242711
chr1	64352472	64352473
chr1	66367614	66367615
chr1	66736079	66736080
chr1	70772323	70772324
chr1	72234246	72234247
chr1	72430456	72430457
chr1	72905490	72905491
chr1	73867509	73867510
chr1	73871146	73871147
chr1	74141248	74141249
chr1	74158080	74158081
chr1	74329368	74329369
chr1	74342426	74342427
chr1	74647919	74647920
chr1	74844303	74844304
chr1	78534234	78534235
chr1	79829474	79829475
chr1	80015423	80015424
chr1	80088079	80088080
chr1	80706095	80706096
chr1	80851261	80851262
chr1	84151975	84151976
chr1	84152350	84152351
chr1	84618035	84618036
chr1	84691547	84691548
chr1	87616921	87616922
chr1	87813632	87813633
chr1	87878749	87878750
chr1	88331186	88331187
chr1	88406197	88406198
chr1	88407726	88407727
chr1	88799061	88799062
chr1	89683012	89683013
chr1	89743700	89743701
chr1	90374932	90374933
chr1	90555104	90555105
chr1	90736860	90736861
chr1	90820898	90820899
chr1	90834144	90834145
chr1	91034176	91034177
chr1	91125249	91125250
chr1	91297709	91297710
chr1	91309850	91309851
chr1	91406732	91406733
chr1	91649279	91649280
chr1	92125142	92125143
chr1	92864424	92864425
chr1	92871626	92871627
chr1	92935383	92935384
chr1	93106623	93106624
chr1	93309928	93309929
chr1	93310858	93310859
chr1	93497312	93497313
chr1	93800567	93800568
chr1	93995311	93995312
chr1	93996302	93996303
chr1	94027107	94027108
chr1	94684033	94684034
chr1	94729452	94729453
chr1	94803459	94803460
chr1	95107025	95107026
chr1	95932024	95932025
chr1	97164888	97164889
chr1	99740370	99740371
chr1	101070411	101070412
chr1	101345688	101345689
chr1	101961470	101961471
chr1	106244558	106244559
chr1	106643680	106643681
chr1	106651234	106651235
chr1	108052022	108052023
chr1	108098699	108098700
chr1	109623066	109623067
chr1	114902994	114902995
chr1	115255008	115255009
chr1	120946730	120946731
chr1	121153616	121153617
chr1	121225837	121225838
chr1	121350508	121350509
chr1	121791801	121791802
chr1	121932310	121932311
chr1	122017773	122017774
chr1	122142412	122142413
chr1	125469367	125469368
chr1	128238632	128238633
chr1	128381506	128381507
chr1	128494181	128494182
chr1	128727363	128727364
chr1	129004269	129004270
chr1	129265548	129265549
chr1	132656561	132656562
chr1	132959628	132959629
chr1	132975551	132975552
chr1	133100244	133100245
chr1	133275373	133275374
chr1	133328628	133328629
chr1	133370385	133370386
chr1	133380211	133380212
chr1	133389151	133389152
chr1	134216018	134216019
chr1	134264751	134264752
chr1	134330097	134330098
chr1	134399480	134399481
chr1	134440370	134440371
chr1	134662538	134662539
chr1	134750063	134750064
chr1	134778040	134778041
chr1	134878634	134878635
chr1	135084656	135084657
chr1	135261724	135261725
chr1	135515834	135515835
chr1	135957815	135957816
chr1	135959489	135959490
chr1	135963986	135963987
chr1	135993262	135993263
chr1	136106974	136106975
chr1	136141797	136141798
chr1	136162591	136162592
chr1	136204172	136204173
chr1	136755447	136755448
chr1	137064153	137064154
chr1	137077743	137077744
chr1	137092619	137092620
chr1	137272167	137272168
chr1	137379116	137379117
chr1	137412028	137412029
chr1	137437113	137437114
chr1	137462416	137462417
chr1	137464834	137464835
chr1	137567116	137567117
chr1	137583523	137583524
chr1	137749216	137749217
chr1	137976417	137976418
chr1	138039282	138039283
chr1	138352967	138352968
chr1	138761731	138761732
chr1	139228409	139228410
chr1	139514211	139514212
chr1	139550298	139550299
chr1	139824620	139824621
chr1	139825313	139825314
chr1	140222775	140222776
chr1	140492898	140492899
chr1	140851470	140851471
chr1	141243463	141243464
chr1	142495630	142495631
chr1	143000665	143000666
chr1	145676158	145676159
chr1	147485279	147485280
chr1	148691526	148691527
chr1	150461901	150461902
chr1	152477696	152477697
chr1	152588030	152588031
chr1	152606793	152606794
chr1	153381912	153381913
chr1	153518585	153518586
chr1	153595849	153595850
chr1	153773079	153773080
chr1	153795354	153795355
chr1	153804939	153804940
chr1	154012786	154012787
chr1	154050572	154050573
chr1	154287202	154287203
chr1	154403545	154403546
chr1	154640012	154640013
chr1	154662627	154662628
chr1	154767688	154767689
chr1	155049536	155049537
chr1	155155456	155155457
chr1	155156293	155156294
chr1	155353672	155353673
chr1	155481954	155481955
chr1	155482440	155482441
chr1	155551044	155551045
chr1	155735074	155735075
chr1	155950299	155950300
chr1	155997473	155997474
chr1	156702075	156702076
chr1	156830644	156830645
chr1	156910335	156910336
chr1	156939707	156939708
chr1	157057311	157057312
chr1	157059799	157059800
chr1	157081375	157081376
chr1	157545661	157545662
chr1	158601355	158601356
chr1	158861493	158861494
chr1	158920377	158920378
chr1	158927908	158927909
chr1	158969590	158969591
chr1	159007346	159007347
chr1	159356409	159356410
chr1	159436897	159436898
chr1	159448464	159448465
chr1	159516751	159516752
chr1	160157012	160157013
chr1	160157549	160157550
chr1	160234035	160234036
chr1	160287398	160287399
chr1	160571561	160571562
chr1	161343630	161343631
chr1	161424309	161424310
chr1	161601076	161601077
chr1	161691318	161691319
chr1	162461749	162461750
chr1	162623439	162623440
chr1	162786236	162786237
chr1	162890247	162890248
chr1	163796311	163796312
chr1	163966715	163966716
chr1	164561315	164561316
chr1	165254790	165254791
chr1	165660607	165660608
chr1	165675944	165675945
chr1	165681671	165681672
chr1	166046156	166046157
chr1	166205647	166205648
chr1	166430581	166430582
chr1	166468984	166468985
chr1	166652907	166652908
chr1	167049635	167049636
chr1	167117733	167117734
chr1	167391276	167391277
chr1	167614808	167614809
chr1	167878531	167878532
chr1	167979434	167979435
chr1	167986639	167986640
chr1	168212980	168212981
chr1	168830941	168830942
chr1	169170255	169170256
chr1	169264755	169264756
chr1	169633154	169633155
chr1	169914438	169914439
chr1	169995853	169995854
chr1	170146449	170146450
chr1	170221448	170221449
chr1	170981896	170981897
chr1	171392827	171392828
chr1	171414969	171414970
chr1	171801820	171801821
chr1	172198721	172198722
chr1	172390226	172390227
chr1	172414320	172414321
chr1	172585888	172585889
chr1	172595611	172595612
chr1	172651752	172651753
chr1	173072030	173072031
chr1	173143229	173143230
chr1	173224561	173224562
chr1	173603309	173603310
chr1	174062568	174062569
chr1	174280257	174280258
chr1	174280814	174280815
chr1	174358600	174358601
chr1	174717028	174717029
chr1	175320637	175320638
chr1	176171727	176171728
chr1	178009956	178009957
chr1	178052624	178052625
chr1	178538094	178538095
chr1	178731278	178731279
chr1	178924510	178924511
chr1	179080693	179080694
chr1	179374778	179374779
chr1	179377858	179377859
chr1	179485881	179485882
chr1	179553587	179553588
chr1	179570520	179570521
chr1	179576401	179576402
chr1	179630916	179630917
chr1	180288049	180288050
chr1	180293785	180293786
chr1	180419472	180419473
chr1	180435339	180435340
chr1	180473372	180473373
chr1	180725263	180725264
chr1	181865886	181865887
chr1	182146376	182146377
chr1	182214761	182214762
chr1	182242989	182242990
chr1	182320967	182320968
chr1	182501190	182501191
chr1	182535243	182535244
chr1	182779003	182779004
chr1	182844043	182844044
chr1	182864012	182864013
chr1	182875909	182875910
chr1	182884570	182884571
chr1	182947649	182947650
chr1	183162962	183162963
chr1	183459674	183459675
chr1	183811790	183811791
chr1	183812535	183812536
chr1	184046399	184046400
chr1	184063050	184063051
chr1	184344963	184344964
chr1	184392113	184392114
chr1	184420019	184420020
chr1	184542986	184542987
chr1	184612910	184612911
chr1	184838813	184838814
chr1	184849211	184849212
chr1	184881546	184881547
chr1	185890175	185890176
chr1	186208171	186208172
chr1	188198129	188198130
chr1	188479262	188479263
chr1	188820240	188820241
chr1	189731917	189731918
chr1	189942223	189942224
chr1	190937996	190937997
chr1	191011894	191011895
chr1	191052622	191052623
chr1	191140113	191140114
chr1	191726384	191726385
chr1	191736149	191736150
chr1	191751916	191751917
chr1	191904041	191904042
chr1	192295448	192295449
chr1	192796652	192796653
chr1	192819657	192819658
chr1	193078546	193078547
chr1	193259450	193259451
chr1	193319195	193319196
chr1	193805497	193805498
chr1	194196125	194196126
chr1	194517842	194517843
chr1	194854227	194854228
chr1	195015693	195015694
chr1	195099245	195099246
chr1	195143443	195143444
chr1	195164689	195164690
chr1	195515365	195515366
chr1	195578150	195578151
chr1	196049399	196049400
chr1	196455753	196455754
chr1	196566181	196566182
chr1	196569304	196569305
chr1	196573288	196573289
chr1	196706021	196706022
chr10	3234739	3234740
chr10	4338763	4338764
chr10	4660410	4660411
chr10	5035861	5035862
chr10	5036432	5036433
chr10	6129099	6129100
chr10	6225713	6225714
chr10	6367259	6367260
chr10	6836609	6836610
chr10	6931552	6931553
chr10	7302166	7302167
chr10	7325144	7325145
chr10	8012143	8012144
chr10	8524268	8524269
chr10	13108548	13108549
chr10	14202405	14202406
chr10	18151062	18151063
chr10	18198918	18198919
chr10	18420151	18420152
chr10	19283564	19283565
chr10	19890488	19890489
chr10	20187164	20187165
chr10	21643495	21643496
chr10	22329135	22329136
chr10	23234508	23234509
chr10	24157197	24157198
chr10	24736199	24736200
chr10	24977038	24977039
chr10	25173303	25173304
chr10	30338218	30338219
chr10	31214225	31214226
chr10	31312717	31312718
chr10	32915927	32915928
chr10	34017219	34017220
chr10	34178803	34178804
chr10	34843579	34843580
chr10	36970975	36970976
chr10	37344025	37344026
chr10	37403192	37403193
chr10	37440732	37440733
chr10	38398014	38398015
chr10	38893101	38893102
chr10	39011808	39011809
chr10	39099680	39099681
chr10	39191978	39191979
chr10	39222278	39222279
chr10	39254248	39254249
chr10	39379245	39379246
chr10	39379849	39379850
chr10	39392696	39392697
chr10	40239659	40239660
chr10	41000142	41000143
chr10	41230656	41230657
chr10	41396356	41396357
chr10	41971031	41971032
chr10	42793267	42793268
chr10	43449132	43449133
chr10	43472023	43472024
chr10	44273619	44273620
chr10	44823221	44823222
chr10	46822677	46822678
chr10	51179696	51179697
chr10	52462621	52462622
chr10	53257633	53257634
chr10	56404611	56404612
chr10	57210764	57210765
chr10	57497046	57497047
chr10	57865984	57865985
chr10	58063946	58063947
chr10	58064454	58064455
chr10	58704105	58704106
chr10	58746726	58746727
chr10	59166153	59166154
chr10	59249281	59249282
chr10	59614219	59614220
chr10	59656507	59656508
chr10	59672145	59672146
chr10	59725334	59725335
chr10	59768240	59768241
chr10	59814590	59814591
chr10	60740814	60740815
chr10	60828845	60828846
chr10	60980656	60980657
chr10	60999051	60999052
chr10	61655782	61655783
chr10	62561369	62561370
chr10	63538955	63538956
chr10	66384342	66384343
chr10	66457513	66457514
chr10	66481830	66481831
chr10	66999698	66999699
chr10	67012124	67012125
chr10	67428999	67429000
chr10	67442456	67442457
chr10	68246334	68246335
chr10	68717374	68717375
chr10	69750817	69750818
chr10	70067474	70067475
chr10	70150049	70150050
chr10	70269728	70269729
chr10	70399917	70399918
chr10	70429877	70429878
chr10	71912474	71912475
chr10	72015514	72015515
chr10	72243151	72243152
chr10	74584009	74584010
chr10	75052004	75052005
chr10	75167277	75167278
chr10	75747439	75747440
chr10	76927492	76927493
chr10	77086101	77086102
chr10	77768916	77768917
chr10	78186324	78186325
chr10	78275580	78275581
chr10	79266868	79266869
chr10	79270579	79270580
chr10	79363820	79363821
chr10	79397263	79397264
chr10	79447706	79447707
chr10	79508580	79508581
chr10	79618250	79618251
chr10	79862585	79862586
chr10	79907263	79907264
chr10	80400531	80400532
chr10	80430010	80430011
chr10	80617699	80617700
chr10	80804527	80804528
chr10	82490995	82490996
chr10	82525297	82525298
chr10	82606088	82606089
chr10	84121437	84121438
chr10	84148916	84148917
chr10	84235352	84235353
chr10	84784021	84784022
chr10	84999654	84999655
chr10	85002339	85002340
chr10	85469497	85469498
chr10	85807574	85807575
chr10	85838858	85838859
chr10	85920615	85920616
chr10	85926673	85926674
chr10	87117458	87117459
chr10	88858792	88858793
chr10	89945808	89945809
chr10	89957962	89957963
chr10	90668352	90668353
chr10	92229533	92229534
chr10	92253237	92253238
chr10	92678431	92678432
chr10	92738163	92738164
chr10	92738809	92738810
chr10	92739366	92739367
chr10	93056912	93056913
chr10	93199199	93199200
chr10	93246690	93246691
chr10	93728810	93728811
chr10	93852764	93852765
chr10	93889283	93889284
chr10	93899339	93899340
chr10	93986666	93986667
chr10	94012841	94012842
chr10	95168844	95168845
chr10	95280629	95280630
chr10	95376419	95376420
chr10	95771920	95771921
chr10	95862416	95862417
chr10	98320285	98320286
chr10	98405745	98405746
chr10	98595027	98595028
chr10	98732197	98732198
chr10	99133549	99133550
chr10	99297807	99297808
chr10	99485030	99485031
chr10	100067124	100067125
chr10	100399885	100399886
chr10	101308876	101308877
chr10	104557621	104557622
chr10	105076145	105076146
chr10	108241636	108241637
chr10	108416768	108416769
chr10	110390320	110390321
chr10	110791893	110791894
chr10	111037825	111037826
chr10	111103017	111103018
chr10	111215712	111215713
chr10	111280076	111280077
chr10	114622024	114622025
chr10	115008456	115008457
chr10	116265381	116265382
chr10	116356330	116356331
chr10	116494214	116494215
chr10	116532258	116532259
chr10	116814107	116814108
chr10	119052546	119052547
chr10	119834823	119834824
chr10	119863448	119863449
chr10	120492659	120492660
chr10	120528541	120528542
chr10	120935805	120935806
chr10	120944572	120944573
chr10	121126853	121126854
chr10	121779933	121779934
chr10	122244354	122244355
chr10	122282775	122282776
chr10	122321660	122321661
chr10	122368480	122368481
chr10	123786518	123786519
chr10	125236109	125236110
chr10	125508666	125508667
chr10	126950108	126950109
chr10	127166421	127166422
chr10	127472589	127472590
chr10	127782105	127782106
chr10	127836054	127836055
chr10	127963193	127963194
chr10	128142229	128142230
chr10	128552930	128552931
chr10	129751751	129751752
chr11	3032123	3032124
chr11	3037518	3037519
chr11	3044196	3044197
chr11	3045039	3045040
chr11	3047778	3047779
chr11	3055519	3055520
chr11	3056044	3056045
chr11	3056644	3056645
chr11	3061134	3061135
chr11	3061521	3061522
chr11	3071421	3071422
chr11	3074343	3074344
chr11	3077084	3077085
chr11	3079738	3079739
chr11	3082115	3082116
chr11	3082640	3082641
chr11	3091349	3091350
chr11	3092494	3092495
chr11	3094799	3094800
chr11	3096700	3096701
chr11	3271450	3271451
chr11	3473333	3473334
chr11	4018719	4018720
chr11	4091896	4091897
chr11	4092368	4092369
chr11	4200917	4200918
chr11	4562051	4562052
chr11	5011006	5011007
chr11	5089401	5089402
chr11	5124621	5124622
chr11	5181189	5181190
chr11	5291507	5291508
chr11	5343406	5343407
chr11	5482613	5482614
chr11	5937467	5937468
chr11	6019527	6019528
chr11	6054303	6054304
chr11	6056842	6056843
chr11	6174847	6174848
chr11	6304914	6304915
chr11	6381874	6381875
chr11	7060904	7060905
chr11	7111334	7111335
chr11	8193819	8193820
chr11	8346204	8346205
chr11	8356964	8356965
chr11	8396840	8396841
chr11	14560531	14560532
chr11	16491710	16491711
chr11	16503079	16503080
chr11	16527830	16527831
chr11	16570048	16570049
chr11	16732062	16732063
chr11	16841607	16841608
chr11	17491409	17491410
chr11	17500982	17500983
chr11	18920449	18920450
chr11	19104210	19104211
chr11	19104770	19104771
chr11	19633942	19633943
chr11	20131325	20131326
chr11	20296438	20296439
chr11	20300913	20300914
chr11	20360643	20360644
chr11	20503595	20503596
chr11	20553659	20553660
chr11	20823350	20823351
chr11	20841734	20841735
chr11	21074386	21074387
chr11	21538575	21538576
chr11	22248726	22248727
chr11	22272806	22272807
chr11	22484495	22484496
chr11	22587240	22587241
chr11	22717044	22717045
chr11	22773522	22773523
chr11	23397537	23397538
chr11	24669854	24669855
chr11	25765783	25765784
chr11	29674542	29674543
chr11	29689038	29689039
chr11	29708409	29708410
chr11	29926162	29926163
chr11	30068199	30068200
chr11	30572910	30572911
chr11	31324287	31324288
chr11	32019340	32019341
chr11	32053952	32053953
chr11	32135725	32135726
chr11	32231391	32231392
chr11	32257827	32257828
chr11	32467434	32467435
chr11	32519551	32519552
chr11	32628419	32628420
chr11	32701319	32701320
chr11	32975508	32975509
chr11	33122341	33122342
chr11	35706679	35706680
chr11	39866278	39866279
chr11	41151967	41151968
chr11	42814573	42814574
chr11	43299663	43299664
chr11	43363453	43363454
chr11	43450314	43450315
chr11	43649522	43649523
chr11	44325813	44325814
chr11	44470701	44470702
chr11	44948246	44948247
chr11	45839789	45839790
chr11	45879002	45879003
chr11	48643309	48643310
chr11	49578325	49578326
chr11	49614600	49614601
chr11	49744701	49744702
chr11	50067077	50067078
chr11	50745048	50745049
chr11	50773452	50773453
chr11	51046754	51046755
chr11	51900326	51900327
chr11	53309261	53309262
chr11	53359957	53359958
chr11	53505678	53505679
chr11	53550410	53550411
chr11	53889056	53889057
chr11	53936045	53936046
chr11	53953639	53953640
chr11	54567983	54567984
chr11	54568383	54568384
chr11	54829271	54829272
chr11	54836628	54836629
chr11	54845533	54845534
chr11	54889306	54889307
chr11	55192076	55192077
chr11	55347103	55347104
chr11	57288002	57288003
chr11	57411865	57411866
chr11	57470354	57470355
chr11	57515330	57515331
chr11	58795660	58795661
chr11	58975101	58975102
chr11	59136578	59136579
chr11	59887644	59887645
chr11	60062221	60062222
chr11	60517538	60517539
chr11	60838735	60838736
chr11	61342843	61342844
chr11	61364634	61364635
chr11	62005681	62005682
chr11	62077290	62077291
chr11	62146204	62146205
chr11	62633862	62633863
chr11	64656578	64656579
chr11	66831441	66831442
chr11	67063000	67063001
chr11	67319176	67319177
chr11	67400283	67400284
chr11	67402634	67402635
chr11	67456490	67456491
chr11	67844475	67844476
chr11	67886648	67886649
chr11	68013428	68013429
chr11	68718492	68718493
chr11	68873062	68873063
chr11	68910618	68910619
chr11	69175689	69175690
chr11	69178691	69178692
chr11	69270653	69270654
chr11	69273646	69273647
chr11	69499565	69499566
chr11	69613784	69613785
chr11	70635932	70635933
chr11	70817313	70817314
chr11	71306453	71306454
chr11	71450442	71450443
chr11	71563444	71563445
chr11	71572247	71572248
chr11	71576812	71576813
chr11	71584265	71584266
chr11	71853121	71853122
chr11	71900420	71900421
chr11	72047782	72047783
chr11	72250020	72250021
chr11	72899118	72899119
chr11	74223368	74223369
chr11	74690379	74690380
chr11	74776619	74776620
chr11	74795184	74795185
chr11	74826619	74826620
chr11	74860640	74860641
chr11	75025702	75025703
chr11	75073912	75073913
chr11	75212632	75212633
chr11	75609978	75609979
chr11	75912932	75912933
chr11	76127078	76127079
chr11	76259183	76259184
chr11	76663424	76663425
chr11	76668503	76668504
chr11	76994531	76994532
chr11	77701107	77701108
chr11	77751644	77751645
chr11	77771888	77771889
chr11	77965900	77965901
chr11	77966637	77966638
chr11	77976202	77976203
chr11	78700997	78700998
chr11	78743064	78743065
chr11	79080884	79080885
chr11	79241414	79241415
chr11	79460552	79460553
chr11	79730467	79730468
chr11	79776236	79776237
chr11	80115436	80115437
chr11	80149341	80149342
chr11	80322475	80322476
chr11	82137850	82137851
chr11	82226312	82226313
chr11	83086355	83086356
chr11	83280853	83280854
chr11	83307156	83307157
chr11	83484457	83484458
chr11	83857075	83857076
chr11	84724090	84724091
chr11	84845754	84845755
chr11	85786091	85786092
chr11	86706924	86706925
chr11	87090400	87090401
chr11	87356593	87356594
chr11	87910835	87910836
chr11	87932428	87932429
chr11	87940121	87940122
chr11	87975701	87975702
chr11	87986736	87986737
chr11	88140572	88140573
chr11	88356644	88356645
chr11	88364718	88364719
chr11	88396057	88396058
chr11	88466729	88466730
chr11	89956500	89956501
chr11	90526773	90526774
chr11	93828898	93828899
chr11	93829598	93829599
chr11	94021794	94021795
chr11	94289981	94289982
chr11	94851174	94851175
chr11	94862465	94862466
chr11	95231488	95231489
chr11	95253777	95253778
chr11	96218574	96218575
chr11	97303360	97303361
chr11	97627894	97627895
chr11	98222289	98222290
chr11	98601461	98601462
chr11	98605419	98605420
chr11	98609434	98609435
chr11	98812913	98812914
chr11	98833036	98833037
chr11	100252570	100252571
chr11	100286007	100286008
chr11	100490031	100490032
chr11	100490266	100490267
chr11	100590071	100590072
chr11	100657569	100657570
chr11	100818630	100818631
chr11	101024195	101024196
chr11	101285992	101285993
chr11	101464146	101464147
chr11	101529620	101529621
chr11	101731727	101731728
chr11	102196401	102196402
chr11	102196772	102196773
chr11	102978446	102978447
chr11	102981752	102981753
chr11	103006329	103006330
chr11	103107834	103107835
chr11	104133863	104133864
chr11	104395577	104395578
chr11	104451848	104451849
chr11	104640268	104640269
chr11	105200095	105200096
chr11	106519521	106519522
chr11	106536097	106536098
chr11	107188986	107188987
chr11	107200507	107200508
chr11	107202845	107202846
chr11	107454035	107454036
chr11	107590100	107590101
chr11	107765365	107765366
chr11	107826768	107826769
chr11	108120202	108120203
chr11	108820024	108820025
chr11	108894210	108894211
chr11	109016119	109016120
chr11	109473201	109473202
chr11	109510108	109510109
chr11	111384208	111384209
chr11	111503175	111503176
chr11	111679754	111679755
chr11	112174471	112174472
chr11	112412909	112412910
chr11	112705996	112705997
chr11	112907633	112907634
chr11	113082891	113082892
chr11	113240168	113240169
chr11	113401051	113401052
chr11	114565844	114565845
chr11	114656764	114656765
chr11	114657475	114657476
chr11	114705632	114705633
chr11	114933504	114933505
chr11	115235638	115235639
chr11	115469835	115469836
chr11	115531851	115531852
chr11	115640783	115640784
chr11	115948430	115948431
chr11	115948940	115948941
chr11	116080360	116080361
chr11	116522678	116522679
chr11	116715099	116715100
chr11	116840226	116840227
chr11	117178240	117178241
chr11	117179272	117179273
chr11	117271612	117271613
chr11	117340360	117340361
chr11	117414062	117414063
chr11	117784731	117784732
chr11	117848095	117848096
chr11	117904746	117904747
chr11	118005596	118005597
chr11	118059732	118059733
chr11	118073254	118073255
chr11	118100679	118100680
chr11	118312279	118312280
chr11	119572124	119572125
chr11	119664469	119664470
chr11	119679590	119679591
chr11	119685675	119685676
chr11	119695792	119695793
chr11	119793306	119793307
chr11	120085400	120085401
chr11	120101714	120101715
chr11	120104934	120104935
chr11	120118818	120118819
chr11	120123663	120123664
chr11	120158117	120158118
chr11	120686925	120686926
chr11	121089363	121089364
chr12	3390965	3390966
chr12	3662776	3662777
chr12	3871715	3871716
chr12	4337621	4337622
chr12	4595648	4595649
chr12	6427550	6427551
chr12	7629541	7629542
chr12	7969436	7969437
chr12	8452374	8452375
chr12	8824919	8824920
chr12	9120686	9120687
chr12	9346011	9346012
chr12	10040527	10040528
chr12	10469833	10469834
chr12	12817118	12817119
chr12	12884518	12884519
chr12	12911664	12911665
chr12	13136752	13136753
chr12	13166611	13166612
chr12	15573475	15573476
chr12	15765927	15765928
chr12	15818628	15818629
chr12	16575908	16575909
chr12	16650924	16650925
chr12	16863036	16863037
chr12	17367109	17367110
chr12	17433670	17433671
chr12	17564974	17564975
chr12	17633156	17633157
chr12	25327471	25327472
chr12	25544405	25544406
chr12	25866284	25866285
chr12	26467147	26467148
chr12	26672948	26672949
chr12	26753288	26753289
chr12	27141236	27141237
chr12	27210075	27210076
chr12	27588616	27588617
chr12	27750091	27750092
chr12	27824649	27824650
chr12	27825319	27825320
chr12	28042014	28042015
chr12	28260677	28260678
chr12	28261107	28261108
chr12	28342558	28342559
chr12	29436593	29436594
chr12	29502395	29502396
chr12	29559651	29559652
chr12	29739422	29739423
chr12	29826286	29826287
chr12	30311427	30311428
chr12	30348364	30348365
chr12	30539329	30539330
chr12	31876413	31876414
chr12	32129376	32129377
chr12	32700051	32700052
chr12	33086208	33086209
chr12	33693276	33693277
chr12	35693233	35693234
chr12	35998048	35998049
chr12	37660108	37660109
chr12	38439390	38439391
chr12	39030616	39030617
chr12	39329255	39329256
chr12	40488064	40488065
chr12	40683209	40683210
chr12	41204534	41204535
chr12	41644241	41644242
chr12	45099761	45099762
chr12	45445333	45445334
chr12	47131259	47131260
chr12	48377197	48377198
chr12	49303077	49303078
chr12	50050287	50050288
chr12	50995768	50995769
chr12	51799999	51800000
chr12	52027178	52027179
chr12	52098529	52098530
chr12	53875558	53875559
chr12	53936358	53936359
chr12	54225304	54225305
chr12	54733221	54733222
chr12	55077782	55077783
chr12	55083179	55083180
chr12	55486520	55486521
chr12	55936075	55936076
chr12	56124536	56124537
chr12	56547837	56547838
chr12	56548238	56548239
chr12	56628412	56628413
chr12	56937157	56937158
chr12	58567932	58567933
chr12	60091223	60091224
chr12	63165090	63165091
chr12	64122324	64122325
chr12	64976837	64976838
chr12	66003708	66003709
chr12	66074404	66074405
chr12	67967432	67967433
chr12	67967855	67967856
chr12	69564281	69564282
chr12	69900733	69900734
chr12	69950776	69950777
chr12	70319084	70319085
chr12	70602985	70602986
chr12	70733882	70733883
chr12	70915442	70915443
chr12	71209287	71209288
chr12	71490986	71490987
chr12	71954121	71954122
chr12	72933537	72933538
chr12	73374875	73374876
chr12	73830489	73830490
chr12	74126565	74126566
chr12	74343111	74343112
chr12	74690843	74690844
chr12	74774850	74774851
chr12	74880731	74880732
chr12	75487120	75487121
chr12	76128188	76128189
chr12	76409827	76409828
chr12	76464322	76464323
chr12	76659054	76659055
chr12	77025133	77025134
chr12	77683362	77683363
chr12	77709467	77709468
chr12	77750931	77750932
chr12	77866467	77866468
chr12	78101140	78101141
chr12	78101920	78101921
chr12	78121257	78121258
chr12	78924465	78924466
chr12	78991047	78991048
chr12	79051616	79051617
chr12	80028432	80028433
chr12	80085186	80085187
chr12	80233546	80233547
chr12	80366278	80366279
chr12	80608149	80608150
chr12	80612906	80612907
chr12	80781424	80781425
chr12	80833839	80833840
chr12	80852864	80852865
chr12	81017292	81017293
chr12	81090834	81090835
chr12	81163860	81163861
chr12	81224604	81224605
chr12	81315031	81315032
chr12	81480885	81480886
chr12	81702990	81702991
chr12	81837870	81837871
chr12	81959419	81959420
chr12	82156433	82156434
chr12	82241763	82241764
chr12	82706843	82706844
chr12	82754607	82754608
chr12	83387329	83387330
chr12	83509736	83509737
chr12	85489466	85489467
chr12	85528079	85528080
chr12	86032522	86032523
chr12	86462903	86462904
chr12	86469763	86469764
chr12	86535369	86535370
chr12	86535862	86535863
chr12	86865618	86865619
chr12	86882228	86882229
chr12	87133990	87133991
chr12	87152101	87152102
chr12	87314336	87314337
chr12	87315252	87315253
chr12	87418340	87418341
chr12	87824496	87824497
chr12	87893741	87893742
chr12	87986001	87986002
chr12	87993910	87993911
chr12	88000800	88000801
chr12	88142252	88142253
chr12	88143383	88143384
chr12	88479196	88479197
chr12	89663888	89663889
chr12	89729597	89729598
chr12	93157611	93157612
chr12	96020852	96020853
chr12	96624131	96624132
chr12	97006755	97006756
chr12	98729751	98729752
chr12	99074595	99074596
chr12	99719825	99719826
chr12	100458766	100458767
chr12	100544571	100544572
chr12	100544877	100544878
chr12	100578322	100578323
chr12	101196969	101196970
chr12	101241546	101241547
chr12	101440243	101440244
chr12	101514296	101514297
chr12	101520796	101520797
chr12	101529068	101529069
chr12	101529682	101529683
chr12	101542629	101542630
chr12	101553512	101553513
chr12	101564078	101564079
chr12	102010640	102010641
chr12	102222033	102222034
chr12	102224840	102224841
chr12	102386160	102386161
chr12	104138380	104138381
chr12	104395060	104395061
chr12	104672858	104672859
chr12	104842992	104842993
chr12	105305759	105305760
chr12	105831889	105831890
chr12	105889228	105889229
chr12	106795711	106795712
chr12	107212060	107212061
chr12	107212674	107212675
chr12	108299990	108299991
chr12	108754920	108754921
chr12	109141636	109141637
chr12	109469371	109469372
chr12	109504544	109504545
chr12	109907054	109907055
chr12	110265310	110265311
chr12	110276491	110276492
chr12	111723950	111723951
chr12	112039149	112039150
chr12	112109688	112109689
chr12	112381287	112381288
chr12	112743248	112743249
chr12	112872409	112872410
chr12	112903641	112903642
chr12	112929968	112929969
chr12	112932000	112932001
chr12	112934602	112934603
chr12	113090164	113090165
chr12	113653419	113653420
chr12	113891684	113891685
chr12	113902642	113902643
chr12	114251589	114251590
chr12	114271041	114271042
chr12	114309976	114309977
chr12	114380435	114380436
chr12	114381170	114381171
chr12	114385859	114385860
chr12	114542035	114542036
chr12	117680058	117680059
chr12	118176233	118176234
chr12	118408326	118408327
chr12	118739780	118739781
chr12	119783447	119783448
chr13	3536973	3536974
chr13	6743002	6743003
chr13	8583623	8583624
chr13	9228252	9228253
chr13	9328750	9328751
chr13	9818137	9818138
chr13	9991913	9991914
chr13	10636257	10636258
chr13	12288509	12288510
chr13	18948132	18948133
chr13	18959981	18959982
chr13	19775380	19775381
chr13	20299215	20299216
chr13	21124790	21124791
chr13	21494690	21494691
chr13	21500491	21500492
chr13	24721028	24721029
chr13	24747686	24747687
chr13	25030041	25030042
chr13	25077564	25077565
chr13	25836924	25836925
chr13	25842821	25842822
chr13	25843163	25843164
chr13	25873001	25873002
chr13	25974760	25974761
chr13	26211396	26211397
chr13	26667898	26667899
chr13	26788016	26788017
chr13	28508340	28508341
chr13	28699583	28699584
chr13	28849842	28849843
chr13	29383863	29383864
chr13	29578780	29578781
chr13	29693021	29693022
chr13	29702525	29702526
chr13	29851705	29851706
chr13	31748385	31748386
chr13	32253564	32253565
chr13	32271899	32271900
chr13	34015553	34015554
chr13	34240790	34240791
chr13	34370348	34370349
chr13	34555014	34555015
chr13	34906526	34906527
chr13	34907230	34907231
chr13	35281044	35281045
chr13	35595598	35595599
chr13	35717759	35717760
chr13	36646962	36646963
chr13	38313140	38313141
chr13	40975504	40975505
chr13	41345208	41345209
chr13	41536221	41536222
chr13	42128273	42128274
chr13	43314317	43314318
chr13	43626644	43626645
chr13	43632782	43632783
chr13	43779895	43779896
chr13	43780254	43780255
chr13	43835160	43835161
chr13	44356695	44356696
chr13	44597350	44597351
chr13	44847280	44847281
chr13	45003152	45003153
chr13	45126512	45126513
chr13	45263365	45263366
chr13	45604127	45604128
chr13	46445235	46445236
chr13	46445799	46445800
chr13	46542169	46542170
chr13	46612975	46612976
chr13	46715138	46715139
chr13	46723600	46723601
chr13	46967635	46967636
chr13	46968353	46968354
chr13	47343896	47343897
chr13	47432444	47432445
chr13	48656634	48656635
chr13	49115752	49115753
chr13	51669537	51669538
chr13	51941968	51941969
chr13	52016362	52016363
chr13	52623908	52623909
chr13	54175932	54175933
chr13	54381473	54381474
chr13	54526776	54526777
chr13	54698345	54698346
chr13	55270637	55270638
chr13	55273173	55273174
chr13	55472767	55472768
chr13	55552345	55552346
chr13	56683728	56683729
chr13	56693710	56693711
chr13	56772794	56772795
chr13	57354754	57354755
chr13	57439581	57439582
chr13	57808981	57808982
chr13	59194407	59194408
chr13	59244797	59244798
chr13	59329572	59329573
chr13	59443468	59443469
chr13	59758575	59758576
chr13	59872842	59872843
chr13	60027530	60027531
chr13	60029180	60029181
chr13	60045294	60045295
chr13	60049047	60049048
chr13	60279194	60279195
chr13	60369192	60369193
chr13	60449431	60449432
chr13	60715781	60715782
chr13	62957798	62957799
chr13	63134489	63134490
chr13	63445940	63445941
chr13	64007903	64007904
chr13	67407512	67407513
chr13	67825343	67825344
chr13	68770597	68770598
chr13	68846458	68846459
chr13	69168324	69168325
chr13	69207818	69207819
chr13	69428908	69428909
chr13	70072522	70072523
chr13	70824236	70824237
chr13	71022942	71022943
chr13	71239514	71239515
chr13	73584697	73584698
chr13	74025187	74025188
chr13	75679017	75679018
chr13	76678282	76678283
chr13	76703542	76703543
chr13	76705212	76705213
chr13	76987679	76987680
chr13	77014268	77014269
chr13	78566576	78566577
chr13	78567158	78567159
chr13	79904884	79904885
chr13	81806076	81806077
chr13	82198743	82198744
chr13	83575720	83575721
chr13	83743790	83743791
chr13	83814045	83814046
chr13	84487895	84487896
chr13	87262444	87262445
chr13	88251269	88251270
chr13	89879061	89879062
chr13	90275981	90275982
chr13	90534735	90534736
chr13	91311534	91311535
chr13	91505188	91505189
chr13	91893372	91893373
chr13	91915436	91915437
chr13	92998975	92998976
chr13	93473389	93473390
chr13	93507022	93507023
chr13	94223528	94223529
chr13	95788106	95788107
chr13	95889374	95889375
chr13	96159101	96159102
chr13	96568799	96568800
chr13	97430198	97430199
chr13	98527249	98527250
chr13	98534230	98534231
chr13	98545224	98545225
chr13	98546910	98546911
chr13	98681319	98681320
chr13	99264811	99264812
chr13	99538499	99538500
chr13	99828563	99828564
chr13	99895112	99895113
chr13	100000632	100000633
chr13	100612858	100612859
chr13	100785674	100785675
chr13	101759260	101759261
chr13	102359720	102359721
chr13	102571613	102571614
chr13	102583415	102583416
chr13	102725867	102725868
chr13	103633014	103633015
chr13	103885588	103885589
chr13	104352672	104352673
chr13	104598768	104598769
chr13	104826663	104826664
chr13	104968932	104968933
chr13	105088205	105088206
chr13	105290000	105290001
chr13	105308649	105308650
chr13	105400812	105400813
chr13	105962472	105962473
chr13	107660784	107660785
chr13	108469150	108469151
chr13	108830065	108830066
chr13	110776258	110776259
chr13	111324675	111324676
chr13	111349026	111349027
chr13	111433178	111433179
chr13	111693580	111693581
chr13	111697957	111697958
chr13	112474408	112474409
chr13	112726899	112726900
chr13	112734463	112734464
chr13	112791549	112791550
chr13	112956180	112956181
chr13	113223807	113223808
chr13	115628956	115628957
chr13	115713785	115713786
chr14	8686296	8686297
chr14	8721417	8721418
chr14	8721981	8721982
chr14	8733473	8733474
chr14	9137721	9137722
chr14	9453997	9453998
chr14	9474553	9474554
chr14	10836428	10836429
chr14	12389387	12389388
chr14	12432244	12432245
chr14	12598376	12598377
chr14	12707866	12707867
chr14	14272970	14272971
chr14	16626770	16626771
chr14	16811101	16811102
chr14	17033669	17033670
chr14	17061012	17061013
chr14	17140658	17140659
chr14	17568734	17568735
chr14	18005415	18005416
chr14	21871315	21871316
chr14	22308328	22308329
chr14	22342569	22342570
chr14	22364712	22364713
chr14	22632256	22632257
chr14	25052268	25052269
chr14	25397843	25397844
chr14	25475074	25475075
chr14	25598820	25598821
chr14	25626772	25626773
chr14	25670201	25670202
chr14	25691828	25691829
chr14	25788846	25788847
chr14	26137686	26137687
chr14	26191282	26191283
chr14	26384980	26384981
chr14	26556317	26556318
chr14	26558238	26558239
chr14	26559824	26559825
chr14	26625725	26625726
chr14	26626372	26626373
chr14	27268239	27268240
chr14	27300323	27300324
chr14	27461224	27461225
chr14	27980620	27980621
chr14	27988732	27988733
chr14	28201823	28201824
chr14	29349159	29349160
chr14	29771982	29771983
chr14	30902550	30902551
chr14	31354983	31354984
chr14	32028896	32028897
chr14	32830312	32830313
chr14	33858144	33858145
chr14	35145758	35145759
chr14	36849882	36849883
chr14	37819282	37819283
chr14	37845868	37845869
chr14	38859314	38859315
chr14	41769367	41769368
chr14	41995174	41995175
chr14	45945394	45945395
chr14	46185264	46185265
chr14	47986851	47986852
chr14	48556772	48556773
chr14	48557060	48557061
chr14	48609289	48609290
chr14	49550853	49550854
chr14	52605820	52605821
chr14	54728629	54728630
chr14	55031806	55031807
chr14	55193381	55193382
chr14	55672506	55672507
chr14	55673156	55673157
chr14	56163460	56163461
chr14	56772060	56772061
chr14	57506906	57506907
chr14	57780301	57780302
chr14	58154305	58154306
chr14	58154853	58154854
chr14	58239670	58239671
chr14	58320779	58320780
chr14	58540867	58540868
chr14	58872285	58872286
chr14	58964434	58964435
chr14	60246942	60246943
chr14	60292159	60292160
chr14	61026309	61026310
chr14	61158093	61158094
chr14	61636252	61636253
chr14	61766890	61766891
chr14	61774249	61774250
chr14	62267696	62267697
chr14	62941792	62941793
chr14	63105495	63105496
chr14	64426046	64426047
chr14	64765271	64765272
chr14	64765688	64765689
chr14	65568704	65568705
chr14	65754345	65754346
chr14	65858693	65858694
chr14	66201759	66201760
chr14	66501387	66501388
chr14	67060799	67060800
chr14	67097608	67097609
chr14	67445936	67445937
chr14	67627783	67627784
chr14	67735333	67735334
chr14	67754921	67754922
chr14	69831099	69831100
chr14	70928224	70928225
chr14	70984225	70984226
chr14	71366078	71366079
chr14	71446750	71446751
chr14	71699727	71699728
chr14	73383429	73383430
chr14	75284213	75284214
chr14	75831482	75831483
chr14	75927410	75927411
chr14	76710270	76710271
chr14	76731568	76731569
chr14	77219704	77219705
chr14	77282899	77282900
chr14	77884812	77884813
chr14	77908091	77908092
chr14	78783441	78783442
chr14	79372410	79372411
chr14	79562631	79562632
chr14	79583270	79583271
chr14	79584962	79584963
chr14	79606131	79606132
chr14	79648393	79648394
chr14	79957911	79957912
chr14	86462727	86462728
chr14	86660371	86660372
chr14	93306966	93306967
chr14	93942925	93942926
chr14	94225421	94225422
chr14	97577753	97577754
chr14	99699710	99699711
chr14	100342506	100342507
chr14	100343574	100343575
chr14	100610411	100610412
chr14	100856155	100856156
chr14	100858460	100858461
chr14	101149248	101149249
chr14	101149663	101149664
chr14	101726785	101726786
chr14	102229581	102229582
chr14	105882813	105882814
chr14	106140375	106140376
chr14	111241267	111241268
chr14	115406627	115406628
chr14	118821827	118821828
chr14	118836195	118836196
chr14	119034817	119034818
chr14	119324785	119324786
chr14	120625082	120625083
chr14	121211788	121211789
chr14	121481729	121481730
chr14	123302318	123302319
chr15	3188122	3188123
chr15	3231941	3231942
chr15	4429145	4429146
chr15	5058286	5058287
chr15	5139694	5139695
chr15	5200230	5200231
chr15	5381917	5381918
chr15	5858901	5858902
chr15	6069030	6069031
chr15	6800844	6800845
chr15	6859876	6859877
chr15	7035271	7035272
chr15	7069052	7069053
chr15	7095119	7095120
chr15	7144921	7144922
chr15	7148905	7148906
chr15	7176449	7176450
chr15	7322312	7322313
chr15	7488684	7488685
chr15	7815072	7815073
chr15	7899542	7899543
chr15	8424948	8424949
chr15	8542479	8542480
chr15	8609700	8609701
chr15	8622649	8622650
chr15	8846616	8846617
chr15	8923622	8923623
chr15	9065194	9065195
chr15	9633802	9633803
chr15	10319961	10319962
chr15	10648701	10648702
chr15	10790846	10790847
chr15	10900219	10900220
chr15	11008213	11008214
chr15	11012804	11012805
chr15	11095824	11095825
chr15	11109827	11109828
chr15	11238152	11238153
chr15	11574065	11574066
chr15	12153237	12153238
chr15	12295953	12295954
chr15	12393926	12393927
chr15	13418512	13418513
chr15	14610637	14610638
chr15	15522402	15522403
chr15	16126011	16126012
chr15	20356877	20356878
chr15	21479103	21479104
chr15	22128687	22128688
chr15	23086435	23086436
chr15	25469262	25469263
chr15	25473190	25473191
chr15	25606033	25606034
chr15	25687869	25687870
chr15	25691676	25691677
chr15	25705076	25705077
chr15	25721843	25721844
chr15	25914103	25914104
chr15	26243566	26243567
chr15	26512385	26512386
chr15	26691578	26691579
chr15	26993915	26993916
chr15	27425918	27425919
chr15	27906815	27906816
chr15	27928684	27928685
chr15	27980824	27980825
chr15	29106165	29106166
chr15	30105051	30105052
chr15	30200908	30200909
chr15	30410580	30410581
chr15	30655840	30655841
chr15	30973375	30973376
chr15	31137291	31137292
chr15	31356004	31356005
chr15	32522488	32522489
chr15	32820747	32820748
chr15	32874031	32874032
chr15	33269612	33269613
chr15	34167788	34167789
chr15	34225938	34225939
chr15	35101654	35101655
chr15	35443549	35443550
chr15	35871191	35871192
chr15	36083036	36083037
chr15	36097643	36097644
chr15	36329252	36329253
chr15	36447139	36447140
chr15	36573860	36573861
chr15	36736502	36736503
chr15	36961506	36961507
chr15	37172238	37172239
chr15	37192332	37192333
chr15	37301813	37301814
chr15	37357655	37357656
chr15	37358120	37358121
chr15	37362515	37362516
chr15	37363193	37363194
chr15	37366286	37366287
chr15	37368903	37368904
chr15	37429062	37429063
chr15	37529143	37529144
chr15	37620521	37620522
chr15	38128731	38128732
chr15	38232232	38232233
chr15	38314231	38314232
chr15	38344245	38344246
chr15	38449199	38449200
chr15	38472636	38472637
chr15	38532076	38532077
chr15	38852658	38852659
chr15	38944350	38944351
chr15	39311464	39311465
chr15	39608699	39608700
chr15	40486041	40486042
chr15	41249541	41249542
chr15	41443997	41443998
chr15	42451841	42451842
chr15	44606115	44606116
chr15	44963482	44963483
chr15	45799925	45799926
chr15	47254219	47254220
chr15	47689008	47689009
chr15	48089653	48089654
chr15	48437313	48437314
chr15	49390469	49390470
chr15	49888559	49888560
chr15	50515724	50515725
chr15	50529876	50529877
chr15	50828858	50828859
chr15	51029229	51029230
chr15	51423061	51423062
chr15	51542046	51542047
chr15	51599594	51599595
chr15	52895430	52895431
chr15	54978771	54978772
chr15	55419919	55419920
chr15	55464828	55464829
chr15	56523862	56523863
chr15	56639353	56639354
chr15	57450275	57450276
chr15	57624723	57624724
chr15	57628174	57628175
chr15	57679188	57679189
chr15	57797754	57797755
chr15	57810175	57810176
chr15	57841533	57841534
chr15	57994645	57994646
chr15	58175027	58175028
chr15	58320754	58320755
chr15	58696792	58696793
chr15	58749945	58749946
chr15	58786753	58786754
chr15	58808305	58808306
chr15	58886594	58886595
chr15	58985400	58985401
chr15	58986381	58986382
chr15	59005658	59005659
chr15	59020214	59020215
chr15	59029515	59029516
chr15	59447167	59447168
chr15	59640679	59640680
chr15	59725640	59725641
chr15	60533082	60533083
chr15	61759811	61759812
chr15	61783316	61783317
chr15	61816487	61816488
chr15	61911189	61911190
chr15	62038239	62038240
chr15	62044028	62044029
chr15	62397702	62397703
chr15	62410452	62410453
chr15	62734680	62734681
chr15	63172175	63172176
chr15	63579963	63579964
chr15	63858268	63858269
chr15	63949389	63949390
chr15	63974587	63974588
chr15	64040695	64040696
chr15	64154971	64154972
chr15	64203028	64203029
chr15	64668743	64668744
chr15	65863915	65863916
chr15	66145861	66145862
chr15	66308170	66308171
chr15	66322208	66322209
chr15	66332417	66332418
chr15	66583635	66583636
chr15	66785080	66785081
chr15	66850855	66850856
chr15	67397563	67397564
chr15	67934260	67934261
chr15	68863077	68863078
chr15	69013953	69013954
chr15	69422285	69422286
chr15	69592741	69592742
chr15	69772673	69772674
chr15	70046569	70046570
chr15	71342021	71342022
chr15	71533178	71533179
chr15	72277787	72277788
chr15	72729277	72729278
chr15	72817918	72817919
chr15	72908553	72908554
chr15	72962532	72962533
chr15	72997091	72997092
chr15	73149695	73149696
chr15	73256489	73256490
chr15	73277547	73277548
chr15	73286569	73286570
chr15	73297225	73297226
chr15	73728355	73728356
chr15	74107243	74107244
chr15	74365798	74365799
chr15	74916108	74916109
chr15	74916950	74916951
chr15	75394073	75394074
chr15	75446169	75446170
chr15	75464509	75464510
chr15	75518788	75518789
chr15	75658836	75658837
chr15	75672333	75672334
chr15	75714810	75714811
chr15	75843315	75843316
chr15	76314745	76314746
chr15	76543532	76543533
chr15	76647585	76647586
chr15	76730378	76730379
chr15	76844578	76844579
chr15	76856761	76856762
chr15	76987135	76987136
chr15	77138155	77138156
chr15	77193451	77193452
chr15	77641008	77641009
chr15	77764931	77764932
chr15	78009038	78009039
chr15	78012407	78012408
chr15	78035971	78035972
chr15	78088344	78088345
chr15	78246648	78246649
chr15	78247624	78247625
chr15	78267525	78267526
chr15	78311875	78311876
chr15	78418011	78418012
chr15	78455065	78455066
chr15	78464454	78464455
chr15	78464984	78464985
chr15	78465872	78465873
chr15	78500909	78500910
chr15	78513415	78513416
chr15	78543067	78543068
chr15	78566115	78566116
chr15	78604005	78604006
chr15	78607446	78607447
chr15	78627193	78627194
chr15	78663495	78663496
chr15	78666899	78666900
chr15	78699054	78699055
chr15	78758582	78758583
chr15	78928210	78928211
chr15	79023558	79023559
chr15	79024156	79024157
chr15	79032174	79032175
chr15	79075197	79075198
chr15	79079871	79079872
chr15	79165731	79165732
chr15	79208470	79208471
chr15	79605044	79605045
chr15	79711125	79711126
chr15	79791898	79791899
chr15	80358158	80358159
chr15	80652883	80652884
chr15	81085670	81085671
chr15	81469378	81469379
chr15	81483163	81483164
chr15	81548877	81548878
chr15	81633136	81633137
chr15	81633519	81633520
chr15	81662134	81662135
chr15	81670234	81670235
chr15	81958258	81958259
chr15	81966110	81966111
chr15	82577150	82577151
chr15	82685088	82685089
chr15	82814312	82814313
chr15	82901515	82901516
chr15	83054209	83054210
chr15	83306696	83306697
chr15	83884563	83884564
chr15	83902824	83902825
chr15	84081940	84081941
chr15	84297501	84297502
chr15	84447043	84447044
chr15	84452633	84452634
chr15	84518216	84518217
chr15	84528178	84528179
chr15	84545406	84545407
chr15	84586641	84586642
chr15	84803811	84803812
chr15	84806288	84806289
chr15	85038803	85038804
chr15	85216993	85216994
chr15	85233795	85233796
chr15	85234115	85234116
chr15	85305315	85305316
chr15	85336164	85336165
chr15	85441511	85441512
chr15	85443974	85443975
chr15	85444549	85444550
chr15	85465181	85465182
chr15	85484325	85484326
chr15	85533100	85533101
chr15	85543398	85543399
chr15	85551161	85551162
chr15	85723023	85723024
chr15	85916613	85916614
chr15	85916836	85916837
chr15	85953282	85953283
chr15	86013368	86013369
chr15	86018850	86018851
chr15	87414869	87414870
chr15	87547625	87547626
chr15	87847718	87847719
chr15	88497319	88497320
chr15	88581779	88581780
chr15	88649836	88649837
chr15	88673591	88673592
chr15	88906857	88906858
chr15	89402181	89402182
chr15	89739115	89739116
chr15	90163901	90163902
chr15	90588761	90588762
chr15	90610940	90610941
chr15	90894451	90894452
chr15	90908714	90908715
chr15	91171247	91171248
chr15	91203770	91203771
chr15	91664123	91664124
chr15	91799077	91799078
chr15	91856012	91856013
chr15	91943128	91943129
chr15	92425417	92425418
chr15	92806390	92806391
chr15	92819224	92819225
chr15	92893375	92893376
chr15	94293792	94293793
chr15	94724053	94724054
chr15	95050243	95050244
chr15	95366848	95366849
chr15	95498019	95498020
chr15	95587779	95587780
chr15	95632831	95632832
chr15	95736864	95736865
chr15	95762973	95762974
chr15	95963304	95963305
chr15	96378564	96378565
chr15	96405478	96405479
chr15	96434944	96434945
chr15	96548197	96548198
chr15	97394515	97394516
chr15	97581375	97581376
chr15	97598315	97598316
chr15	97619454	97619455
chr15	97642751	97642752
chr15	97725468	97725469
chr15	98241296	98241297
chr15	98251507	98251508
chr15	98306085	98306086
chr15	98808301	98808302
chr15	98817560	98817561
chr15	99108866	99108867
chr15	99163432	99163433
chr15	99164267	99164268
chr15	99165100	99165101
chr15	99173986	99173987
chr15	99251081	99251082
chr15	99271096	99271097
chr15	99342738	99342739
chr15	99429852	99429853
chr15	99445315	99445316
chr15	99507707	99507708
chr15	99554474	99554475
chr15	99649437	99649438
chr15	99731744	99731745
chr15	99735034	99735035
chr15	99997023	99997024
chr15	100260778	100260779
chr15	100333852	100333853
chr15	101066233	101066234
chr15	101076399	101076400
chr15	101091064	101091065
chr15	101359736	101359737
chr15	101928814	101928815
chr15	101936054	101936055
chr15	101947262	101947263
chr15	102230101	102230102
chr15	102377332	102377333
chr15	102563858	102563859
chr15	102650654	102650655
chr15	102851217	102851218
chr15	102988083	102988084
chr15	103045837	103045838
chr15	103079105	103079106
chr16	3114585	3114586
chr16	3843219	3843220
chr16	4139265	4139266
chr16	4337264	4337265
chr16	4489345	4489346
chr16	4512842	4512843
chr16	4926025	4926026
chr16	5549078	5549079
chr16	6073947	6073948
chr16	6112670	6112671
chr16	8541180	8541181
chr16	8566431	8566432
chr16	8585702	8585703
chr16	8586768	8586769
chr16	10366903	10366904
chr16	10473888	10473889
chr16	10535165	10535166
chr16	10925834	10925835
chr16	10979418	10979419
chr16	11008431	11008432
[truncated: 2,850 more rows]

## Sheet: TCF3
chr1	3282639	3282894
chr1	4404350	4404541
chr1	4416941	4417199
chr1	4916367	4916715
chr1	4960751	4960987
chr1	5012896	5013964
chr1	5218992	5219269
chr1	9544720	9544900
chr1	9554552	9554925
chr1	9560302	9560711
chr1	9601705	9602021
chr1	9617602	9618093
chr1	9619951	9620691
chr1	9621080	9621409
chr1	9631361	9631655
chr1	9639312	9639513
chr1	12634706	12635075
chr1	12949787	12949967
chr1	13604758	13605083
chr1	13926193	13926524
chr1	13990977	13991213
chr1	14098600	14098868
chr1	14174332	14174570
chr1	14189034	14189210
chr1	14208837	14209279
chr1	14282458	14282693
chr1	14616836	14617100
chr1	16081839	16082068
chr1	16101903	16102177
chr1	16112900	16113209
chr1	16145131	16145313
chr1	16176621	16176910
chr1	16202669	16202908
chr1	16536805	16536985
chr1	17050119	17050373
chr1	17050688	17050899
chr1	17439464	17439689
chr1	17828585	17828771
chr1	20048420	20048739
chr1	20166540	20166782
chr1	20857488	20857865
chr1	20941683	20941981
chr1	21042678	21043148
chr1	21401636	21401894
chr1	21606805	21607044
chr1	21795085	21795438
chr1	22601704	22602027
chr1	22647509	22647758
chr1	23771597	23771920
chr1	23853214	23853601
chr1	24233081	24233360
chr1	24237283	24237605
chr1	24560397	24560600
chr1	25476218	25476523
chr1	25881455	25881689
chr1	25949263	25949528
chr1	25949873	25950159
chr1	31159871	31160168
chr1	33099236	33099688
chr1	33552524	33552744
chr1	34062650	34062892
chr1	34102559	34102754
chr1	34178585	34178801
chr1	34207550	34207961
chr1	34212193	34212400
chr1	34222875	34223133
chr1	34224060	34224371
chr1	34239774	34240075
chr1	34240380	34240785
chr1	34640595	34641104
chr1	34721115	34721356
chr1	34721962	34722386
chr1	34722989	34723717
chr1	34770903	34771087
chr1	34776875	34777153
chr1	35868057	35868587
chr1	36087253	36087711
chr1	36366271	36366741
chr1	36580488	36580761
chr1	36585146	36585437
chr1	36636833	36637384
chr1	36660300	36660734
chr1	36661157	36661569
chr1	36663899	36664209
chr1	36693312	36693756
chr1	36704547	36704842
chr1	36918703	36918933
chr1	36976962	36977329
chr1	36978792	36979037
chr1	37006400	37006819
chr1	37053628	37054053
chr1	37120007	37120256
chr1	37179141	37179552
chr1	37276887	37277343
chr1	37389690	37390015
chr1	37404206	37404427
chr1	37568978	37569158
chr1	38279037	38279436
chr1	38364925	38365272
chr1	38391158	38391359
chr1	38507612	38507850
chr1	38814635	38815023
chr1	38900235	38900425
chr1	39534868	39535069
chr1	39770822	39771428
chr1	39791150	39791605
chr1	39792763	39793177
chr1	39806559	39806886
chr1	39818914	39819109
chr1	39829290	39829496
chr1	39862414	39862780
chr1	39895640	39896107
chr1	39980287	39980568
chr1	39998543	39998934
chr1	40003877	40005020
chr1	40034149	40034584
chr1	40174465	40174770
chr1	40862331	40862511
chr1	40874624	40874899
chr1	40961725	40961975
chr1	41084342	41084897
chr1	41215094	41215417
chr1	41436955	41437192
chr1	41446971	41447392
chr1	41612600	41612809
chr1	41661941	41662215
chr1	41662561	41662988
chr1	41708695	41708962
chr1	41709546	41709946
chr1	41945195	41945406
chr1	42202626	42202806
chr1	42314648	42315016
chr1	42584541	42584721
chr1	42595484	42596078
chr1	42686726	42686941
chr1	42693431	42693691
chr1	42747108	42747298
chr1	42748454	42748743
chr1	42750306	42750622
chr1	42751014	42751273
chr1	42770295	42770475
chr1	42771165	42771452
chr1	43193620	43193840
chr1	43198465	43198661
chr1	43316777	43317082
chr1	43373946	43374587
chr1	43414990	43415359
chr1	43453396	43453785
chr1	43531210	43531515
chr1	43531809	43532160
chr1	43560521	43560767
chr1	43588103	43588442
chr1	43751599	43752151
chr1	43755300	43755915
chr1	43773014	43773194
chr1	43775684	43775855
chr1	43787282	43787735
chr1	43830865	43831314
chr1	43880280	43880581
chr1	44648558	44648982
chr1	45007917	45008105
chr1	45962157	45962414
chr1	50954559	50954856
chr1	51027696	51028060
chr1	51091165	51091384
chr1	51171587	51171862
chr1	51273107	51273494
chr1	51346795	51347169
chr1	51347459	51347886
chr1	51664287	51664559
chr1	51909279	51909488
chr1	51936247	51936563
chr1	52025946	52026172
chr1	52033490	52033753
chr1	52053473	52054147
chr1	52095986	52096275
chr1	52337069	52337289
chr1	52654198	52654474
chr1	52769890	52770375
chr1	52774916	52775263
chr1	53886025	53886285
chr1	54541806	54542128
chr1	54642404	54642874
chr1	54772385	54772565
chr1	54883550	54883885
chr1	54979510	54979895
chr1	55217960	55218395
chr1	55250290	55250477
chr1	55258713	55259104
chr1	55510987	55511348
chr1	55546137	55546616
chr1	55580766	55581229
chr1	55585626	55585846
chr1	55645096	55645277
chr1	55675535	55676120
chr1	55798840	55799080
chr1	56890181	56890547
chr1	57281468	57281988
chr1	57323678	57323897
chr1	57444722	57445153
chr1	57486693	57486936
chr1	57690787	57691173
chr1	57846684	57847101
chr1	57947118	57947347
chr1	58086472	58086737
chr1	58087311	58087795
chr1	59480096	59480308
chr1	59490967	59491168
chr1	59572972	59573465
chr1	59782434	59782786
chr1	60908053	60908247
chr1	61156576	61156944
chr1	61203255	61203478
chr1	61208653	61208879
chr1	61253524	61253746
chr1	61255395	61255732
chr1	61260121	61260538
chr1	61278100	61278338
chr1	61290934	61291638
chr1	61959557	61959948
chr1	62262436	62262842
chr1	62290851	62291098
chr1	62439734	62439921
chr1	62458211	62458406
chr1	62789857	62790348
chr1	62796330	62796578
chr1	62799993	62800198
chr1	62830543	62830980
chr1	62906972	62907182
chr1	62907461	62907732
chr1	62980147	62980506
chr1	62980607	62981167
chr1	62998074	62998325
chr1	63237462	63237694
chr1	63674795	63675135
chr1	63752446	63752662
chr1	63810573	63810853
chr1	63875083	63875288
chr1	63976048	63976262
chr1	63981514	63981793
chr1	64067287	64067570
chr1	64081790	64082337
chr1	64113545	64113729
chr1	64134478	64134758
chr1	64189204	64190007
chr1	64220359	64220758
chr1	64235976	64236438
chr1	64236711	64237128
chr1	64242320	64243061
chr1	64245460	64245755
chr1	64247192	64247592
chr1	64267176	64267454
chr1	64324645	64324861
chr1	64342181	64342562
chr1	64349493	64349674
chr1	64352131	64352567
chr1	64701788	64702402
chr1	64841923	64842234
chr1	64851885	64852113
chr1	64854388	64854627
chr1	64906949	64907129
chr1	65293423	65293788
chr1	65453985	65454160
chr1	66218827	66219067
chr1	66222618	66222844
chr1	66233718	66233950
chr1	66241780	66242187
chr1	66258050	66258360
chr1	66273103	66273306
chr1	66273510	66273907
chr1	66274812	66275167
chr1	66313111	66313317
chr1	66355743	66356074
chr1	66367369	66367822
chr1	66406477	66406741
chr1	66409954	66410168
chr1	66433381	66433674
chr1	66435133	66435516
chr1	66684706	66685142
chr1	66701786	66701978
chr1	66735939	66736290
chr1	66739269	66739750
chr1	66918219	66918572
chr1	67444288	67444691
chr1	67849801	67850080
chr1	68093737	68094027
chr1	68394730	68394992
chr1	68395893	68396073
chr1	68919662	68919842
chr1	69505486	69505687
chr1	69900101	69900348
chr1	70426705	70426998
chr1	70513500	70513745
chr1	70521994	70522230
chr1	71044162	71044499
chr1	71587108	71587399
chr1	71730475	71730682
chr1	72261361	72261574
chr1	72430319	72430616
chr1	72766755	72767397
chr1	72785475	72785803
chr1	72786263	72786699
chr1	72797858	72798317
chr1	72850791	72851020
chr1	72861864	72862064
chr1	72873100	72873302
chr1	72876546	72877025
chr1	72879489	72879710
chr1	72905404	72905805
chr1	72921308	72921638
chr1	73016140	73016297
chr1	73135145	73135325
chr1	73136437	73136693
chr1	73163161	73163539
chr1	73215913	73216323
chr1	73288986	73289225
chr1	73317378	73317811
chr1	73464865	73465088
chr1	73687348	73687618
chr1	73689364	73689601
chr1	73749174	73749472
chr1	73768535	73768858
chr1	73790586	73790940
chr1	73834301	73834612
chr1	73867140	73867720
chr1	73870876	73871672
chr1	73875734	73875914
chr1	73897141	73897625
chr1	73988825	73989133
chr1	73991006	73991324
chr1	74009709	74009892
chr1	74025913	74026231
chr1	74045189	74045678
chr1	74074344	74074733
chr1	74077443	74077799
chr1	74141154	74141490
chr1	74156365	74156545
chr1	74157815	74158488
chr1	74165685	74166031
chr1	74342230	74342726
chr1	74379109	74379390
chr1	74387029	74387209
chr1	74585245	74585570
chr1	74589146	74589351
chr1	74844029	74844452
chr1	74871584	74871793
chr1	75367061	75367240
chr1	75396510	75397143
chr1	75569409	75569690
chr1	75795417	75795595
chr1	76279995	76280186
chr1	76939178	76939683
chr1	77024325	77024540
chr1	77071620	77072053
chr1	77223161	77223441
chr1	77256264	77256522
chr1	77374104	77374339
chr1	77493427	77493868
chr1	78368292	78368534
chr1	78534096	78534415
chr1	78545594	78545893
chr1	78564816	78565046
chr1	78741897	78742394
chr1	78757505	78758254
chr1	78816264	78816525
chr1	78849028	78849585
chr1	79448956	79449231
chr1	79694045	79694248
chr1	79803527	79803958
chr1	79829262	79829713
chr1	79857283	79857589
chr1	79857775	79858240
chr1	79881749	79881955
chr1	79914415	79914644
chr1	79952791	79952957
chr1	80015069	80015713
chr1	80020179	80020423
chr1	80058248	80058567
chr1	80087929	80088136
chr1	80221402	80221859
chr1	80235272	80235656
chr1	80633757	80634161
chr1	80648683	80648967
chr1	80652841	80653381
chr1	80705868	80706175
chr1	80753608	80753798
chr1	80820609	80820801
chr1	80850946	80851416
chr1	81277661	81277931
chr1	81741078	81741413
chr1	81883548	81883908
chr1	82147350	82147692
chr1	82186077	82186306
chr1	82254094	82254429
chr1	82382383	82382622
chr1	82473259	82473600
chr1	82552432	82552612
chr1	82631073	82631412
chr1	82828139	82828319
chr1	83207803	83207987
chr1	83719714	83719906
chr1	83903941	83904229
chr1	84151710	84152546
chr1	84173567	84174004
chr1	84249991	84250721
chr1	84384147	84384499
chr1	84582044	84582394
chr1	84617884	84618212
chr1	84932307	84932536
chr1	87616794	87617239
chr1	87798525	87799107
chr1	87813333	87813862
chr1	87818252	87819418
chr1	87824741	87825281
chr1	87830306	87830738
chr1	87866160	87866408
chr1	87878600	87878934
chr1	87928761	87929521
chr1	87935275	87935687
chr1	87949816	87950468
chr1	87951480	87951853
chr1	88172092	88172451
chr1	88330998	88331616
chr1	88332025	88332307
chr1	88402115	88402348
chr1	88405968	88406384
chr1	88407467	88408031
chr1	88639339	88639734
chr1	88770405	88770591
chr1	88909239	88909505
chr1	88910275	88910472
chr1	88910520	88910700
chr1	88925428	88925703
chr1	89072440	89072781
chr1	89170138	89170679
chr1	89210630	89210810
chr1	89213252	89213508
chr1	89354633	89354827
chr1	89504395	89504732
chr1	89519461	89519648
chr1	89682716	89683481
chr1	89743408	89744106
chr1	89776304	89776981
chr1	89788240	89788467
chr1	89796278	89796505
chr1	89826318	89826723
chr1	90173702	90174068
chr1	90374701	90375189
chr1	90436487	90436784
chr1	90520235	90520441
chr1	90554705	90555430
chr1	90557266	90557506
chr1	90604135	90604506
chr1	90691687	90692033
chr1	90706205	90706651
chr1	90736105	90736506
chr1	90736590	90737193
chr1	90820699	90821287
chr1	90833967	90834276
chr1	90937881	90938218
chr1	90991146	90991326
chr1	91000957	91001357
chr1	91016942	91017120
chr1	91032589	91033130
chr1	91033563	91034246
chr1	91035013	91035256
chr1	91067781	91068122
chr1	91124986	91125422
chr1	91132001	91132371
chr1	91297159	91297812
chr1	91309663	91310081
chr1	91318073	91318253
chr1	91321092	91321586
chr1	91406605	91407074
chr1	91414463	91414645
chr1	91418512	91418886
chr1	91473730	91473910
chr1	91518558	91518848
chr1	91553405	91553593
chr1	91756980	91757256
chr1	92124863	92125339
chr1	92127401	92127669
chr1	92129060	92129502
chr1	92175754	92175970
chr1	92187384	92187840
chr1	92233880	92234060
chr1	92239023	92239210
chr1	92371635	92372076
chr1	92401816	92401996
chr1	92457630	92457810
chr1	92864116	92864701
chr1	92869898	92870078
chr1	92870169	92870478
chr1	92871455	92872028
chr1	92935127	92935921
chr1	92949527	92949744
chr1	92952225	92952685
chr1	92959075	92959273
chr1	92961831	92962029
chr1	92995429	92995732
chr1	93073475	93073788
chr1	93077890	93078250
chr1	93078703	93078883
chr1	93103452	93103809
chr1	93104369	93104756
chr1	93105868	93106850
chr1	93107785	93107996
chr1	93108306	93108601
chr1	93310547	93311177
chr1	93333077	93333352
chr1	93353122	93353357
chr1	93354853	93355033
chr1	93422432	93422781
chr1	93497237	93497510
chr1	93747931	93748199
chr1	93799797	93799977
chr1	93800167	93800434
chr1	93875147	93875330
chr1	93895821	93896075
chr1	93995020	93995406
chr1	93995946	93996551
chr1	93996934	93997513
chr1	94026980	94027352
chr1	94033747	94034160
chr1	94091956	94092704
chr1	94108589	94109341
chr1	94112485	94113054
chr1	94154619	94154968
chr1	94240346	94240592
chr1	94333527	94333971
chr1	94595670	94595827
chr1	94641446	94641729
chr1	94683655	94684326
chr1	94729271	94729606
chr1	94734491	94734940
chr1	95104040	95104499
chr1	95106707	95107333
chr1	95113379	95114211
chr1	95117193	95117397
chr1	95123717	95124399
chr1	95581949	95582129
chr1	95591629	95591814
chr1	96309631	96309911
chr1	96400273	96400849
chr1	97115448	97115820
chr1	97164564	97165057
chr1	97260544	97260724
chr1	97943199	97943433
chr1	99437334	99437627
chr1	99450347	99451041
chr1	99730405	99730644
chr1	99740142	99740522
chr1	99759919	99760119
chr1	99820314	99820493
chr1	104067202	104067575
chr1	106643285	106643864
chr1	106651081	106651402
chr1	106664905	106665134
chr1	106666975	106667204
chr1	106668510	106668870
chr1	106734788	106735081
chr1	106744934	106745145
chr1	106745437	106745823
chr1	107075999	107076220
chr1	107802920	107803221
chr1	107939672	107939899
chr1	108051806	108052234
chr1	108096268	108096596
chr1	108098544	108098999
chr1	108137695	108138001
chr1	108299802	108300058
chr1	108303453	108303850
chr1	108324797	108325198
chr1	108379677	108379863
chr1	108499604	108499872
chr1	108526739	108526928
chr1	108550133	108550315
chr1	108719061	108719233
chr1	108766565	108766951
chr1	109872519	109872880
chr1	109998683	109999367
chr1	115254534	115255308
chr1	115309509	115309826
chr1	115313416	115313783
chr1	115327971	115328126
chr1	115455495	115455726
chr1	115529868	115530141
chr1	115935978	115936305
chr1	116227192	116227454
chr1	118180658	118180886
chr1	120191598	120191884
chr1	120813050	120813463
chr1	120873210	120873629
chr1	120877269	120877500
chr1	120879036	120879386
chr1	120930323	120930889
chr1	120946507	120947056
chr1	120994489	120994972
chr1	121099072	121099296
chr1	121151999	121152467
chr1	121153316	121153869
chr1	121155948	121156295
chr1	121225383	121225998
chr1	121285253	121285840
chr1	121286372	121286585
chr1	121350347	121350693
chr1	121414800	121415065
chr1	121430042	121430244
chr1	121775379	121775935
chr1	121932108	121932572
chr1	121933610	121933852
chr1	121953046	121953210
chr1	122012078	122013065
chr1	122016716	122016896
chr1	122017721	122017901
chr1	122104184	122104455
chr1	122117797	122118196
chr1	122142292	122142705
chr1	122254016	122254342
chr1	122363402	122363670
chr1	122818119	122818383
chr1	122981951	122982160
chr1	122983756	122984060
chr1	123073848	123074211
chr1	123347738	123347941
chr1	127422688	127422940
chr1	127438971	127439151
chr1	127536039	127536659
chr1	127921054	127921472
chr1	128064084	128064261
chr1	128238457	128238778
chr1	128366767	128366960
chr1	128381192	128381714
chr1	128470311	128470511
chr1	128493939	128494450
chr1	128553085	128553303
chr1	128580282	128581163
chr1	128727246	128727544
chr1	128762205	128762471
chr1	128821759	128822554
chr1	128889058	128889485
chr1	129003994	129004434
chr1	129136478	129136893
chr1	129235660	129236091
chr1	129245100	129245630
chr1	129265167	129265724
chr1	129311144	129311382
chr1	129319220	129319406
chr1	129842314	129842497
chr1	130301611	130302012
chr1	130368598	130368958
chr1	130369548	130369728
chr1	130457806	130458247
chr1	130492135	130492469
chr1	130556677	130556857
chr1	130686607	130686792
chr1	132404751	132404970
chr1	132892098	132892361
chr1	132926912	132927092
chr1	132927647	132927827
chr1	132959344	132959867
chr1	132975282	132975880
chr1	133030811	133031124
chr1	133031798	133032032
chr1	133242114	133242380
chr1	133242563	133242887
chr1	133248047	133248440
chr1	133250755	133251189
chr1	133275160	133275863
chr1	133313893	133314118
chr1	133314661	133314877
chr1	133328425	133328969
chr1	133334727	133334954
chr1	133337232	133337451
chr1	133357807	133358132
chr1	133370020	133370713
chr1	133378899	133379208
chr1	133379993	133380452
chr1	133389071	133389268
chr1	133418243	133418513
chr1	133562427	133562786
chr1	133592921	133593241
chr1	133633938	133634181
chr1	133647755	133648010
chr1	133648608	133648928
chr1	133667282	133667561
chr1	133961671	133961965
chr1	133963975	133964329
chr1	134118758	134119125
chr1	134215806	134216179
chr1	134223450	134223718
chr1	134271961	134272240
chr1	134327405	134327698
chr1	134328472	134328690
chr1	134330013	134330293
chr1	134365556	134365912
chr1	134419708	134419993
chr1	134454552	134455043
chr1	134536871	134537073
chr1	134662858	134663094
chr1	134683453	134683831
chr1	134740833	134741067
chr1	134749949	134750240
chr1	134777995	134778304
chr1	134829106	134829373
chr1	134874065	134874344
chr1	134965519	134965834
chr1	134968514	134968714
chr1	135075320	135075636
chr1	135084631	135084895
chr1	135199168	135199346
chr1	135261633	135261864
chr1	135592557	135592752
chr1	135789802	135790190
chr1	135804649	135804838
chr1	135812569	135812910
chr1	135885590	135885793
chr1	135957622	135958203
chr1	135959091	135960351
chr1	135963840	135964235
chr1	135974045	135974244
chr1	135992765	135993531
chr1	136101886	136102083
chr1	136129462	136130003
chr1	136141590	136142254
chr1	136162436	136162683
chr1	136204114	136204306
chr1	136413109	136413431
chr1	136917532	136917824
chr1	137022606	137022958
chr1	137053214	137053394
chr1	137055160	137055999
chr1	137064089	137064277
chr1	137066428	137066786
chr1	137092271	137092904
chr1	137271926	137272253
chr1	137400127	137400307
chr1	137409731	137410403
chr1	137411548	137412282
chr1	137414138	137414318
chr1	137415206	137415457
chr1	137445274	137445711
chr1	137454609	137455043
chr1	137461701	137462098
chr1	137462162	137462741
chr1	137464683	137465096
chr1	137477656	137477980
chr1	137540770	137540955
chr1	137566420	137566716
chr1	137573621	137573802
chr1	137577751	137578047
chr1	137583339	137583835
chr1	137631074	137631573
chr1	137636045	137636315
chr1	137637647	137637951
chr1	137667864	137668050
chr1	137698624	137698915
chr1	137747408	137747588
chr1	137749134	137749372
chr1	137826398	137826723
chr1	137840359	137840553
chr1	138015494	138015751
chr1	138016539	138016781
chr1	138026797	138027093
chr1	138033057	138033297
chr1	138228486	138228862
chr1	138352262	138353233
chr1	138359142	138359361
chr1	139487857	139488157
chr1	139514055	139514390
chr1	139546775	139546955
chr1	139795038	139795312
chr1	139796726	139797132
chr1	139799570	139799819
chr1	139799916	139800274
chr1	139824374	139824838
chr1	139825109	139825537
chr1	139835397	139835685
chr1	139926200	139926549
chr1	140045483	140045702
chr1	140222646	140223256
chr1	140396846	140397060
chr1	140465081	140465275
chr1	140492763	140493032
chr1	140583414	140583624
chr1	140889130	140889452
chr1	141090692	141090874
chr1	141129234	141129556
chr1	141233665	141234169
chr1	141243077	141243774
chr1	141245274	141245496
chr1	142904945	142905125
chr1	142994243	142994452
chr1	143000487	143000960
chr1	143072821	143073066
chr1	144882239	144882482
chr1	144976827	144977409
chr1	145041595	145042023
chr1	145042229	145042548
chr1	145096886	145097162
chr1	145794234	145794416
chr1	145966630	145966946
chr1	148639974	148640154
chr1	148691146	148691724
chr1	151804082	151804353
chr1	152587925	152588259
chr1	152606569	152606998
chr1	152608138	152608358
chr1	152720423	152720685
chr1	152797307	152797547
chr1	153473735	153474052
chr1	153479190	153479537
chr1	153532772	153533123
chr1	153772921	153773180
chr1	153792065	153792313
chr1	153792462	153792737
chr1	153800807	153801017
chr1	153831127	153831542
chr1	154012124	154013156
chr1	154015458	154015657
chr1	154050341	154050763
chr1	154247720	154248132
chr1	154257763	154258229
chr1	154261731	154261932
chr1	154287032	154287414
chr1	154309022	154309289
chr1	154309556	154309868
chr1	154333316	154333933
chr1	154403312	154403994
chr1	154407704	154407910
chr1	154436521	154436752
chr1	154439884	154440081
chr1	154487613	154488144
chr1	154639915	154640287
chr1	154662437	154662871
chr1	154665029	154665265
chr1	154861535	154862300
chr1	154868818	154869037
chr1	154884800	154885119
chr1	154887245	154887507
chr1	154892556	154892808
chr1	154907002	154907226
chr1	154931189	154931745
chr1	155027742	155027922
chr1	155039103	155039397
chr1	155049284	155049812
chr1	155155775	155156612
chr1	155348837	155349028
chr1	155353389	155353833
chr1	155435076	155435531
chr1	155482537	155482993
chr1	155489030	155489747
chr1	155550518	155551593
chr1	155552087	155552422
chr1	155805467	155805664
chr1	155821428	155821833
chr1	155949896	155950535
chr1	155967802	155968128
chr1	155997257	155997855
chr1	156667234	156667413
chr1	156690591	156690924
chr1	156830157	156830846
chr1	156910052	156910524
chr1	156930378	156930658
chr1	156939591	156939873
chr1	156956559	156956880
chr1	156961085	156961367
chr1	156969742	156970020
chr1	157056935	157057562
chr1	157057768	157057948
chr1	157059595	157060382
chr1	157076954	157077536
chr1	157080916	157081853
chr1	157087121	157087368
chr1	157545464	157545903
chr1	157573129	157573308
chr1	157578375	157578555
chr1	157702697	157702924
chr1	157883601	157883892
chr1	158678711	158679038
chr1	158684746	158685146
chr1	158861322	158861543
chr1	158920237	158920602
chr1	158927236	158927523
chr1	158927564	158928498
chr1	158969353	158970073
chr1	159044665	159045056
chr1	159356156	159356582
chr1	159436814	159437005
chr1	159437351	159437673
chr1	159448244	159448687
chr1	159484238	159484576
chr1	159486649	159486848
chr1	159516679	159517081
chr1	159671209	159671794
chr1	159758073	159758376
chr1	160156879	160157108
chr1	160157197	160157943
chr1	160240568	160240924
chr1	160287226	160287475
chr1	160312548	160312909
chr1	160316927	160317225
chr1	160419725	160420173
chr1	160571414	160571821
chr1	160663397	160663639
chr1	161093384	161093574
chr1	161323593	161323796
chr1	161343342	161344053
chr1	161345848	161346201
chr1	161423990	161424735
chr1	161447884	161448107
chr1	161600932	161601487
chr1	161616498	161616934
chr1	161671493	161671763
chr1	161671889	161672309
chr1	161690951	161691595
chr1	161782379	161782559
chr1	161795814	161796092
chr1	162300797	162301002
chr1	162371831	162372290
chr1	162461529	162461879
chr1	162623199	162623589
chr1	162786011	162786404
chr1	163126402	163126582
chr1	163154915	163155356
chr1	163177474	163177656
chr1	163203697	163203909
chr1	163393884	163394285
chr1	163424534	163424722
chr1	163619140	163619320
chr1	163930160	163930657
chr1	164011905	164012326
chr1	164127147	164127373
chr1	164224129	164224325
chr1	164762384	164762635
chr1	164790103	164790337
chr1	165187458	165187857
chr1	165269173	165269362
chr1	165353884	165354064
chr1	165548517	165548731
chr1	165570635	165571233
chr1	165675897	165676163
chr1	166700741	166700953
chr1	167117579	167117847
chr1	167121740	167121928
chr1	167486861	167487095
chr1	167519395	167519711
chr1	167548586	167548790
chr1	167844201	167844578
chr1	167865079	167865666
chr1	167878298	167878722
chr1	167979179	167979682
chr1	168174488	168174668
chr1	168210706	168211099
chr1	168212686	168213205
chr1	168328384	168328751
chr1	168328948	168329311
chr1	168331609	168331866
chr1	168332265	168332505
chr1	168815533	168815832
chr1	168943556	168943947
chr1	168946365	168946759
chr1	169012886	169013114
chr1	169170067	169170871
chr1	169200093	169200519
chr1	169976435	169976806
chr1	170127721	170128005
chr1	170146139	170146615
chr1	170216862	170217326
chr1	170218058	170218461
chr1	170221180	170221652
chr1	170322426	170322639
chr1	170406450	170406634
chr1	170981496	170982072
chr1	171023687	171024089
chr1	171392646	171392973
chr1	171397843	171398441
chr1	171414703	171416025
chr1	172090349	172090670
chr1	172354837	172355043
chr1	172389999	172390474
chr1	172429998	172430386
chr1	172432852	172433074
chr1	172451675	172452030
chr1	172465304	172465574
chr1	172485070	172485470
chr1	172585602	172586174
chr1	172595408	172595719
chr1	172628042	172628261
chr1	172635323	172635545
chr1	172651744	172652047
chr1	173180797	173181133
chr1	173193132	173193727
chr1	173258979	173259239
chr1	173603256	173603576
chr1	174029547	174030008
chr1	174062314	174062684
chr1	174109339	174109530
chr1	174131321	174131616
chr1	174144015	174144207
chr1	174226051	174226264
chr1	174272640	174273321
chr1	174279898	174280920
chr1	176431905	176432205
chr1	176452549	176452761
chr1	176551707	176551887
chr1	177058567	177059064
chr1	177408330	177408510
chr1	178005613	178005865
chr1	178029224	178029483
chr1	178704787	178704970
chr1	178731089	178731365
chr1	178779550	178779836
chr1	178917241	178917515
chr1	178924357	178924621
chr1	178924866	178925052
chr1	178934278	178934483
chr1	179080447	179081076
chr1	179105575	179105979
chr1	179294548	179294809
chr1	179341614	179341998
chr1	179372861	179373042
chr1	179374577	179374925
chr1	179377676	179378078
chr1	179485743	179486251
chr1	179503480	179503801
chr1	179553410	179553841
chr1	179570398	179570998
chr1	179576175	179576690
chr1	179630783	179631034
chr1	180287951	180288375
chr1	180557102	180557588
chr1	180733324	180733534
chr1	180942310	180942769
chr1	180991949	180992129
chr1	181076963	181077147
chr1	181179554	181179801
chr1	181639571	181639973
chr1	182216496	182216676
chr1	182242518	182242698
chr1	182242868	182243341
chr1	182295657	182295837
chr1	182320519	182321163
chr1	182323470	182323784
chr1	182778675	182779259
chr1	182875679	182876058
chr1	182945600	182946040
chr1	182946761	182947184
chr1	183323875	183324244
chr1	183376113	183376396
chr1	183376787	183377005
chr1	183389749	183389986
chr1	183396812	183397075
chr1	183414819	183415260
chr1	183459548	183459866
chr1	183482649	183482962
chr1	183576380	183576604
chr1	183582722	183582934
chr1	183583322	183583558
chr1	183723761	183724040
chr1	183811596	183812288
chr1	183812439	183812664
chr1	183983154	183983375
chr1	184012231	184012411
chr1	184021008	184021188
chr1	184033484	184034038
chr1	184044119	184044589
chr1	184045950	184046764
chr1	184167637	184167817
chr1	184328421	184328601
chr1	184391965	184392361
chr1	184405154	184405571
chr1	184542956	184543215
chr1	184612941	184613403
chr1	184838590	184838855
chr1	184848958	184849443
chr1	185375153	185375333
chr1	185607656	185608015
chr1	185616233	185616413
chr1	185889870	185890340
chr1	186264913	186265420
chr1	186272752	186273348
chr1	186277594	186278220
chr1	187024913	187025282
chr1	187109179	187109388
chr1	187263089	187263485
chr1	187265518	187265820
chr1	187397086	187397365
chr1	187441574	187441853
chr1	187565026	187565646
chr1	188074264	188074495
chr1	188085464	188085709
chr1	188095337	188095594
chr1	188212287	188212467
chr1	188272753	188273046
chr1	188479018	188479486
chr1	188815347	188815639
chr1	188876376	188876865
chr1	189941985	189942396
chr1	190553119	190553363
chr1	190839417	190839597
chr1	191011538	191012161
chr1	191134151	191134469
chr1	191469257	191469557
chr1	191555724	191555938
chr1	191654583	191655061
chr1	191734914	191735143
chr1	191750261	191750552
chr1	191751648	191752084
chr1	191903665	191904276
chr1	191961715	191962211
chr1	192014122	192014418
chr1	192306845	192307028
chr1	192391718	192391935
chr1	192506102	192506582
chr1	192551953	192552477
chr1	192819513	192819914
chr1	192946705	192946996
chr1	192994367	192994547
chr1	193078341	193078672
chr1	193116181	193116479
chr1	193259183	193259687
chr1	193294667	193294867
chr1	193319137	193319448
chr1	193632485	193633177
chr1	193801140	193801412
chr1	193805305	193805797
chr1	193885642	193886172
chr1	193894210	193894431
chr1	194660929	194661182
chr1	194915447	194915624
chr1	194977396	194977840
chr1	195015585	195015802
chr1	195064687	195064866
chr1	195099103	195099475
chr1	195104341	195105057
chr1	195142197	195142570
chr1	195143299	195143642
chr1	195156508	195156711
chr1	195164485	195164965
chr1	195173235	195173444
chr1	195194280	195194554
chr1	195212429	195212788
chr1	195233704	195233945
chr1	195279889	195280191
chr1	195560266	195560509
chr1	195577986	195578496
chr1	195775845	195776323
chr1	195845516	195845848
chr1	196034378	196034890
chr1	196049282	196049614
chr1	196187585	196187765
chr1	196330441	196330664
chr1	196413679	196414024
chr1	196415471	196415640
chr1	196439574	196439975
chr1	196440158	196440576
chr1	196455236	196455963
chr1	196484687	196485161
chr1	196504092	196504543
chr1	196508283	196508541
chr1	196565940	196566520
chr1	196569000	196569545
chr1	196572654	196572838
chr1	196573009	196573450
chr1	196582253	196582626
chr1	196598156	196598358
chr1	196634519	196634889
chr1	196642002	196642171
chr1	196711657	196712290
chr1	196781998	196782233
chr1	196804386	196804633
chr10	3187253	3187463
chr10	3196208	3196832
chr10	3227763	3228220
chr10	3234531	3234931
chr10	4338504	4338891
chr10	4846556	4846804
chr10	4922119	4922310
chr10	5035704	5036569
chr10	5764378	5764663
chr10	6007101	6007332
chr10	6225569	6225844
chr10	6367039	6367605
chr10	6649073	6649551
chr10	6650695	6651030
chr10	6715435	6715694
chr10	6749508	6749782
chr10	6836489	6836830
chr10	6849359	6849654
chr10	6931353	6931729
chr10	6951904	6952237
chr10	7301930	7302706
chr10	7324874	7325428
chr10	7747008	7747188
chr10	7758231	7758441
chr10	7896426	7896794
chr10	8007060	8007522
chr10	8012009	8012226
chr10	8017125	8017352
chr10	8043345	8043621
chr10	8059539	8059815
chr10	8111027	8111465
chr10	8472388	8472580
chr10	8480460	8480709
chr10	8517697	8517893
chr10	8521045	8521414
chr10	8524124	8524559
chr10	8675738	8675918
chr10	8688404	8688709
chr10	9576624	9576825
chr10	9609188	9609472
chr10	10994239	10994534
chr10	11025851	11026071
chr10	11962745	11963154
chr10	12456681	12457003
chr10	12478022	12478338
chr10	12543334	12543612
chr10	12587797	12588082
chr10	13166693	13166877
chr10	13434311	13434815
chr10	13636793	13637133
chr10	13954887	13955209
chr10	14052476	14053036
chr10	14202194	14202638
chr10	14211681	14211972
chr10	17276329	17276538
chr10	17282443	17282808
chr10	17600555	17600787
chr10	17703150	17703439
chr10	18150925	18151150
chr10	18202735	18202915
chr10	18226188	18226368
chr10	18226557	18226743
chr10	18419937	18420328
chr10	18536378	18536702
chr10	19029886	19030240
chr10	19116703	19116883
chr10	19283373	19283737
chr10	19328980	19329243
chr10	19765979	19766354
chr10	19890395	19890771
chr10	19946622	19946892
chr10	20574742	20574968
chr10	20635507	20635848
chr10	20655090	20655465
chr10	21033668	21033848
chr10	21308334	21308665
chr10	21324827	21325120
chr10	21356566	21356838
chr10	21398968	21399152
chr10	21549209	21549436
chr10	21643257	21643775
chr10	21672419	21672590
chr10	22329026	22329282
chr10	22450109	22450349
chr10	22466175	22466550
chr10	22736146	22736326
chr10	22940205	22940541
chr10	23074584	23074797
chr10	23765319	23765547
chr10	24036852	24037301
chr10	24156953	24157364
chr10	24324816	24325024
chr10	24451110	24451447
chr10	24646792	24647187
chr10	24678968	24679148
chr10	24743346	24744041
chr10	24758565	24758818
chr10	25031827	25032109
chr10	25091801	25092592
chr10	25206263	25206505
chr10	25728804	25729017
chr10	26017071	26017394
chr10	26492128	26492360
chr10	26492610	26493046
chr10	26556325	26556540
chr10	26575737	26575929
chr10	26847357	26847538
chr10	27887033	27887275
chr10	27952212	27952399
chr10	28306670	28306850
chr10	30603274	30603456
chr10	30892875	30893446
chr10	31197598	31197931
chr10	31224000	31224349
chr10	31312489	31312938
chr10	31351827	31352100
chr10	31960988	31961290
chr10	32589397	32589892
chr10	32590856	32591011
chr10	32601805	32602048
chr10	32899452	32900401
chr10	32915742	32916140
chr10	33991433	33991834
chr10	35093258	35093483
chr10	36798308	36798635
chr10	36860603	36860876
chr10	36890314	36890674
chr10	36970658	36971402
chr10	36983501	36983745
chr10	37088892	37089399
chr10	37097843	37098132
chr10	37100004	37100208
chr10	37117139	37117442
chr10	37347762	37348036
chr10	37386449	37386752
chr10	37386835	37387332
chr10	37402919	37403354
chr10	37411763	37412090
chr10	37440573	37440962
chr10	37532270	37532713
chr10	38028838	38029279
chr10	38077655	38078061
chr10	38139602	38139874
chr10	38273512	38273882
chr10	38274933	38275164
chr10	38628126	38628445
chr10	38749763	38749943
chr10	38892965	38893403
chr10	38929052	38929366
chr10	38929542	38929796
chr10	38946302	38946486
chr10	38947295	38947773
chr10	38953765	38954114
chr10	38986484	38986686
chr10	39011646	39012110
chr10	39041013	39041389
chr10	39109218	39109517
chr10	39191600	39191813
chr10	39222025	39222434
chr10	39254162	39254870
chr10	39255238	39255474
chr10	39260842	39261223
chr10	39272326	39272563
chr10	39296585	39296801
chr10	39307070	39307628
chr10	39315750	39315972
chr10	39343707	39343969
chr10	39360641	39360880
chr10	39365661	39366012
chr10	39366348	39366993
chr10	39373812	39374036
chr10	39379082	39380297
chr10	39392151	39392866
chr10	39394744	39394939
chr10	39569995	39570245
chr10	40219758	40219935
chr10	40236345	40236570
chr10	40239512	40239879
chr10	40662678	40662874
chr10	40690741	40690949
chr10	40733192	40733419
chr10	41000090	41000299
chr10	41220870	41221121
chr10	41264348	41264642
chr10	41416876	41417185
chr10	41654347	41654904
chr10	41656045	41656223
chr10	41791178	41791378
chr10	41812301	41812684
chr10	42130634	42130843
chr10	42614148	42614399
chr10	42654542	42654853
chr10	42763226	42763674
chr10	42793192	42793420
chr10	42874884	42875094
chr10	42900283	42900479
chr10	42967826	42968134
chr10	42996138	42996445
chr10	43465884	43466079
chr10	43471728	43472186
chr10	43726585	43726868
chr10	43838452	43838727
chr10	44101173	44101590
chr10	44324935	44325404
chr10	44373663	44373986
chr10	44717291	44717728
chr10	44719942	44720176
chr10	44729379	44729762
chr10	44823050	44823437
chr10	44842488	44842668
chr10	46417766	46418195
chr10	46822374	46822859
chr10	52423876	52424157
chr10	52462435	52462878
chr10	52624681	52625122
chr10	53257348	53257954
chr10	55017844	55018052
chr10	56558802	56559073
chr10	56613047	56613285
chr10	56655041	56655221
chr10	57291972	57292386
chr10	57395671	57395944
chr10	57427780	57427999
chr10	57504157	57504783
chr10	57542393	57542658
chr10	57548535	57548882
chr10	57785605	57785875
chr10	57801148	57801423
chr10	57804540	57804819
chr10	58063722	58064672
chr10	58065408	58065791
chr10	58067472	58067783
chr10	58102219	58102408
chr10	58126273	58126561
chr10	58369796	58370128
chr10	58412744	58413006
chr10	58542527	58542767
chr10	58543099	58543430
chr10	58657716	58657979
chr10	58724942	58725127
chr10	58746529	58746816
chr10	58797700	58797891
chr10	59236636	59236851
chr10	59249077	59249460
chr10	59326440	59326663
chr10	59353068	59353360
chr10	59359882	59360159
chr10	59360447	59360627
chr10	59362109	59362380
chr10	59362549	59362930
chr10	59370483	59370977
chr10	59372383	59372565
chr10	59379000	59379287
chr10	59414706	59414979
chr10	59420589	59420889
chr10	59421255	59421631
chr10	59435275	59435531
chr10	59491851	59492043
chr10	59613904	59614327
chr10	59656207	59656790
chr10	59657912	59658152
chr10	59665521	59665917
chr10	59671941	59672271
chr10	59725199	59725439
chr10	59748486	59748666
chr10	59792245	59792444
chr10	59853343	59853638
chr10	60284599	60284851
chr10	60717675	60717857
chr10	60724548	60724948
chr10	60740586	60741185
chr10	60828692	60828936
chr10	60835355	60835679
chr10	60842930	60843371
chr10	60865808	60866017
chr10	60898036	60898310
chr10	60999011	60999318
chr10	61039030	61039210
chr10	61054168	61054348
chr10	61060795	61061210
chr10	61655424	61655625
chr10	61657200	61657579
chr10	61783283	61783670
chr10	61819211	61819465
chr10	62202875	62203055
chr10	62309868	62310070
chr10	63145599	63145781
chr10	63343143	63343535
chr10	63538820	63539054
chr10	64178676	64178861
chr10	65605655	65605897
chr10	66382921	66383562
chr10	66383834	66384511
chr10	66404791	66405041
chr10	66406709	66407037
chr10	66457115	66458266
chr10	66466518	66466882
chr10	66481502	66482174
chr10	66488771	66489048
chr10	66519156	66519384
chr10	66521139	66521323
chr10	66524068	66524569
chr10	66579098	66579350
chr10	66606958	66607434
chr10	66645508	66645774
chr10	66648280	66648579
chr10	66688941	66689292
chr10	66750758	66751066
chr10	67012085	67012335
chr10	67320313	67320560
chr10	67375379	67375574
chr10	67417185	67417612
chr10	67428579	67429211
chr10	67616144	67616602
chr10	67654821	67655043
chr10	67674763	67675071
chr10	68021239	68021491
chr10	68258293	68258648
chr10	68262716	68262950
chr10	68544647	68544884
chr10	68701109	68701295
chr10	68717051	68717572
chr10	69057269	69057571
chr10	69074568	69075075
chr10	69657821	69658141
chr10	69754699	69754959
chr10	69842662	69843236
chr10	69995125	69995381
chr10	70026447	70026674
chr10	70229302	70229573
chr10	70269550	70270053
chr10	70290956	70291433
chr10	70295392	70295730
chr10	70323940	70324258
chr10	70412286	70412511
chr10	70429675	70430063
chr10	70515089	70515303
chr10	70521589	70521875
chr10	70685433	70685702
chr10	70939567	70939937
chr10	71423507	71423704
chr10	71561884	71562096
chr10	72806881	72807120
chr10	72947053	72947231
chr10	72954540	72954743
chr10	73245756	73246078
chr10	73576811	73577205
chr10	74383577	74383830
chr10	74415434	74416230
chr10	74495133	74495424
chr10	74499750	74500072
chr10	74554515	74554776
chr10	74569782	74569989
chr10	74583797	74584211
chr10	74827180	74827410
chr10	74859615	74860028
chr10	74901250	74901463
chr10	74913602	74914013
chr10	74928708	74929065
chr10	75018798	75019188
chr10	75095554	75095734
chr10	75110237	75110413
chr10	75147097	75147294
chr10	75166945	75167457
chr10	75290447	75290812
chr10	75291107	75291699
chr10	75359075	75359278
chr10	75406933	75407264
chr10	75530524	75530734
chr10	75713647	75714073
chr10	75716246	75716623
chr10	76586786	76586992
chr10	76592540	76593281
chr10	76678363	76678566
chr10	76692130	76692725
chr10	76693117	76693336
chr10	76706435	76706722
chr10	76927294	76927508
chr10	77073251	77073619
chr10	77085914	77086281
chr10	77097325	77097645
chr10	77129260	77129522
chr10	77250692	77250876
chr10	77685756	77686092
chr10	77699665	77699951
chr10	77760641	77760935
chr10	77768766	77769096
chr10	78033890	78034070
chr10	78038482	78038795
chr10	78185463	78185860
chr10	78186097	78186464
chr10	79069285	79069604
chr10	79094269	79094449
chr10	79237120	79237552
chr10	79266574	79266984
chr10	79270602	79270886
chr10	79316124	79316439
chr10	79321166	79321463
chr10	79363654	79364233
chr10	79395431	79395891
chr10	79396877	79397479
chr10	79399659	79399931
chr10	79511137	79511522
chr10	79525987	79526204
chr10	79581267	79581644
chr10	79618010	79618462
chr10	79619678	79620054
chr10	79623569	79623880
chr10	79722593	79722938
chr10	79765257	79765735
chr10	79907156	79907399
chr10	80140908	80141287
chr10	80319051	80319357
chr10	80320027	80320314
chr10	80399304	80399589
chr10	80400433	80400811
chr10	80617501	80618002
chr10	80753436	80753732
chr10	80870406	80870588
chr10	80874269	80874922
chr10	80879597	80879989
chr10	80898272	80898552
chr10	81014395	81014672
chr10	81026958	81027221
chr10	81031509	81031773
chr10	81033327	81033883
chr10	81059872	81060770
chr10	81065698	81065886
chr10	82493706	82494019
chr10	82494311	82494621
chr10	82518981	82519387
chr10	82525034	82525528
chr10	82570162	82570337
chr10	82579638	82580155
chr10	82580621	82580969
chr10	82593503	82593859
chr10	82596677	82597004
chr10	82602975	82603360
chr10	82605771	82606298
chr10	82624858	82625145
chr10	82647293	82647559
chr10	83100120	83100417
chr10	83447963	83448176
chr10	83523418	83523800
chr10	83820785	83821097
chr10	84109279	84109837
chr10	84121293	84121504
chr10	84148655	84149156
chr10	84149602	84149987
chr10	84156591	84156999
chr10	84173554	84173983
chr10	84235701	84235881
chr10	84237469	84237707
chr10	84273307	84273682
chr10	84315362	84315593
chr10	84426456	84426873
chr10	84485899	84486156
chr10	84783729	84784118
chr10	85002196	85002532
chr10	85060762	85061045
chr10	85071330	85071570
chr10	85416227	85416499
chr10	85532030	85532210
chr10	85611699	85612035
chr10	85781527	85781801
chr10	85786340	85786639
chr10	85809291	85809537
chr10	85828397	85828592
chr10	85838592	85839129
chr10	85852754	85852946
chr10	85919958	85920338
chr10	85920434	85920754
chr10	86234989	86235267
chr10	86270746	86271162
chr10	86282603	86282918
chr10	86288646	86288916
chr10	86452644	86452876
chr10	86910405	86910725
chr10	86955172	86955728
chr10	87389858	87390319
chr10	87914026	87914266
chr10	88053792	88054121
chr10	88913100	88913495
chr10	89833529	89833810
chr10	89843656	89843968
chr10	89930356	89930536
chr10	89945582	89946007
chr10	89957513	89958229
chr10	90129418	90129832
chr10	90704508	90704746
chr10	91182291	91183357
chr10	92300422	92300614
chr10	92718040	92718447
chr10	92737832	92738883
chr10	92739053	92739575
chr10	92895225	92895463
chr10	93037092	93037358
chr10	93199013	93199450
chr10	93234556	93235214
chr10	93246369	93246848
chr10	93263069	93263355
chr10	93592387	93592674
chr10	93635502	93635737
chr10	93693322	93693673
chr10	93813662	93813905
chr10	93876296	93877092
chr10	93878829	93879028
chr10	93889116	93889421
chr10	93943521	93943852
chr10	93986561	93986884
chr10	93992778	93993097
chr10	94012505	94013084
chr10	94024281	94024479
chr10	94030698	94031048
chr10	94047650	94048109
chr10	94172413	94173010
chr10	94262243	94262527
chr10	94292182	94292546
chr10	94498114	94498416
chr10	94602303	94602569
chr10	94605393	94606104
chr10	94608127	94608322
chr10	94662225	94662531
chr10	94784730	94784969
chr10	95134111	95134293
chr10	95188489	95188781
chr10	95280392	95280777
chr10	95653128	95653561
chr10	95771565	95772175
chr10	95862186	95862666
chr10	96109165	96109421
chr10	96121663	96121852
chr10	96149616	96149820
chr10	96153626	96153942
chr10	96214257	96214529
chr10	96289003	96289268
chr10	96606570	96606786
chr10	96871870	96872165
chr10	97264341	97264583
chr10	97812176	97812385
chr10	98211894	98212455
chr10	98319939	98320531
chr10	98405604	98405987
chr10	98550619	98551059
chr10	98594704	98595293
chr10	98599066	98599562
chr10	98660281	98660543
chr10	98664490	98664670
chr10	98725614	98725985
chr10	98732035	98732387
chr10	98756022	98756371
chr10	98903767	98903945
chr10	98994289	98994578
chr10	98996201	98996488
chr10	99032894	99033294
chr10	99101735	99101981
chr10	99102176	99102389
chr10	99297428	99298024
chr10	99404338	99404671
chr10	99484417	99485293
chr10	99528661	99528973
chr10	100779642	100779830
chr10	104098756	104099123
chr10	104557239	104557803
chr10	105008982	105009162
chr10	105075910	105076583
chr10	105234618	105234937
chr10	105679248	105679631
chr10	107408923	107409106
chr10	107570681	107571104
chr10	108241310	108241708
chr10	108416743	108417096
chr10	109006941	109007158
chr10	109121617	109121800
chr10	109178893	109179072
chr10	109424772	109424977
chr10	109431409	109431680
chr10	109539311	109539573
chr10	109866776	109867001
chr10	109914795	109915389
chr10	110390203	110390550
chr10	110766259	110766701
chr10	110791640	110792077
chr10	110855600	110855980
chr10	110946573	110946784
chr10	110977002	110977252
chr10	111003904	111004459
chr10	111036678	111036981
chr10	111037418	111038326
chr10	111102803	111103569
chr10	111304664	111304968
chr10	111373651	111374308
chr10	112313695	112313984
chr10	113640174	113640402
chr10	114906088	114906501
chr10	114998234	114998535
chr10	115008334	115008845
chr10	115016651	115016953
chr10	115201173	115201502
chr10	115799192	115799675
chr10	115971458	115971626
chr10	116172709	116173016
chr10	116233217	116233397
chr10	116265216	116265631
chr10	116531972	116532387
chr10	117023923	117024156
chr10	117431943	117432148
chr10	117486424	117486689
chr10	118492273	118492745
chr10	118655193	118655436
chr10	118933245	118933631
chr10	119052429	119052669
chr10	119121374	119121833
chr10	119128848	119129036
chr10	119463660	119463887
chr10	119466364	119466711
chr10	119595315	119595587
chr10	119814361	119814976
chr10	119825364	119826080
chr10	119859132	119859456
chr10	119859939	119860483
chr10	119863384	119863795
chr10	119865497	119865877
chr10	120041718	120041930
chr10	120061487	120061661
chr10	120073331	120073545
chr10	120123146	120123476
chr10	120182158	120182497
chr10	120188535	120188759
chr10	120492547	120492812
chr10	120643050	120643656
chr10	120861012	120861266
chr10	120863781	120864129
chr10	120866292	120866472
chr10	120908839	120909081
chr10	120938084	120938597
chr10	120941962	120942684
chr10	120942782	120943053
chr10	120943799	120944120
chr10	121274016	121274238
chr10	121274417	121274963
chr10	121323890	121324120
chr10	121383213	121383546
chr10	121401331	121401532
chr10	121755926	121756246
chr10	122130320	122130633
chr10	122282651	122283257
chr10	122321147	122321876
chr10	122324577	122325134
chr10	122331661	122332021
chr10	122401261	122401442
chr10	122572965	122573164
chr10	122584171	122584542
chr10	123519883	123520128
chr10	123786361	123786714
chr10	124558858	124559244
chr10	124761266	124761496
chr10	125276810	125276993
chr10	125434096	125434513
chr10	125508460	125508783
chr10	125613870	125614244
chr10	125770913	125771093
chr10	126362515	126362684
chr10	126421748	126421962
chr10	126423723	126424014
chr10	126519090	126519275
chr10	126531411	126532139
chr10	126946657	126946993
chr10	126979187	126979382
chr10	127034379	127034836
chr10	127051272	127051994
chr10	127052726	127052919
chr10	127097025	127097206
chr10	127781918	127782199
chr10	128232816	128233003
chr10	128241866	128242101
chr10	128346726	128346926
chr10	128355349	128355589
chr10	128365584	128365764
chr10	128366730	128366909
chr10	128375579	128375802
chr10	129751360	129751885
chr11	3032060	3032264
chr11	3045001	3045295
chr11	3046127	3046307
chr11	3047503	3047787
chr11	3065647	3065871
chr11	3135450	3135630
chr11	3192678	3193018
chr11	3230629	3230950
chr11	3294794	3294989
chr11	3473106	3473579
chr11	3753512	3753832
chr11	3803145	3803417
chr11	4018190	4018375
chr11	4074561	4075031
chr11	4092020	4092464
chr11	4092910	4093183
chr11	4128357	4128964
chr11	4157850	4158059
chr11	4191672	4191921
chr11	4200734	4201082
chr11	4236216	4236505
chr11	4520650	4521133
chr11	4522542	4522978
chr11	4561994	4562501
chr11	4574592	4574963
chr11	4578763	4579067
chr11	4625598	4625966
chr11	4702954	4703569
chr11	4933282	4933561
chr11	5050743	5051021
chr11	5089312	5090008
chr11	5120756	5120972
chr11	5171519	5171783
chr11	5171874	5172190
chr11	5177589	5177908
chr11	5178451	5178765
chr11	5180831	5181479
chr11	5197171	5197538
chr11	5214872	5215226
chr11	5218111	5218391
chr11	5291289	5291678
chr11	5748799	5748999
chr11	5850078	5850302
chr11	5900314	5900838
chr11	5915162	5915391
chr11	5920872	5921039
chr11	5928884	5929135
chr11	5930746	5931077
chr11	5935503	5936104
chr11	5968671	5968861
chr11	5975685	5975906
chr11	6007690	6008214
chr11	6009531	6009743
chr11	6019345	6019606
chr11	6054117	6054762
chr11	6060771	6060951
chr11	6295562	6295995
chr11	6304604	6305153
chr11	6306247	6306517
chr11	6381603	6382204
chr11	6389348	6389619
chr11	6425328	6425564
chr11	6446220	6446490
chr11	6447957	6448197
chr11	7111168	7111671
chr11	7308933	7309393
chr11	7341458	7341650
chr11	7365468	7365983
chr11	7366290	7366945
chr11	7402094	7402403
chr11	8047884	8048345
chr11	8115705	8115896
chr11	8121747	8122016
chr11	8154101	8154431
chr11	8193768	8194038
chr11	8324486	8324942
chr11	8343586	8343891
chr11	8345931	8346525
chr11	8356756	8357207
chr11	8358023	8358278
chr11	8381917	8382174
chr11	8392500	8392680
chr11	8396687	8397038
chr11	8413388	8414276
chr11	8423533	8424056
chr11	8457038	8457329
chr11	8763799	8764267
chr11	8816254	8816481
chr11	9031844	9032086
chr11	9341255	9341549
chr11	10914105	10914433
chr11	10988220	10988601
chr11	12131465	12131898
chr11	14669539	14669749
chr11	16434887	16435112
chr11	16491466	16491886
chr11	16502886	16503280
chr11	16527540	16528175
chr11	16569828	16570288
chr11	16716561	16716787
chr11	16731806	16732524
chr11	16743932	16744107
chr11	16777667	16777992
chr11	16795468	16795725
chr11	16841294	16841816
chr11	17206086	17206479
chr11	17851508	17851701
chr11	18015634	18016068
chr11	18196345	18196532
chr11	18481005	18482014
chr11	18482416	18482830
chr11	18648212	18648516
chr11	18778059	18778257
chr11	19012375	19012580
chr11	19043412	19043833
chr11	19104020	19104419
chr11	19104559	19104976
chr11	19424210	19424453
chr11	19817455	19817721
chr11	19823976	19824242
chr11	20131202	20131572
chr11	20247508	20247908
chr11	20295969	20296573
chr11	20300810	20301094
chr11	20301885	20302092
chr11	20377242	20377687
chr11	20503248	20503731
chr11	20555771	20556160
chr11	20563612	20563818
chr11	20758981	20759204
chr11	20815149	20815617
chr11	20821945	20822241
chr11	20823176	20823562
chr11	20841506	20841988
chr11	21469652	21469942
chr11	21538541	21538721
chr11	22248523	22248992
chr11	22271560	22272166
chr11	22272544	22273185
chr11	22340618	22340854
chr11	22484185	22485054
chr11	22487663	22487985
chr11	22761381	22761587
chr11	22773430	22773855
chr11	22823677	22824035
chr11	22878767	22879082
[truncated: 12,279 more rows]

## Sheet: MAX
chr1	5013000	5013001
chr1	5073206	5073207
chr1	7387861	7387862
chr1	9535597	9535598
chr1	9538179	9538180
chr1	9560487	9560488
chr1	9601882	9601883
chr1	9617348	9617349
chr1	9620334	9620335
chr1	9621235	9621236
chr1	9738638	9738639
chr1	9934197	9934198
chr1	12634910	12634911
chr1	14209129	14209130
chr1	14282614	14282615
chr1	16094668	16094669
chr1	17087251	17087252
chr1	20810384	20810385
chr1	21795307	21795308
chr1	21820375	21820376
chr1	21951074	21951075
chr1	25285576	25285577
chr1	25950078	25950079
chr1	31007061	31007062
chr1	31158725	31158726
chr1	33726557	33726558
chr1	33871518	33871519
chr1	34207743	34207744
chr1	34496303	34496304
chr1	34722204	34722205
chr1	34722694	34722695
chr1	34723044	34723045
chr1	36087482	36087483
chr1	36614060	36614061
chr1	36661343	36661344
chr1	36664209	36664210
chr1	36693666	36693667
chr1	36748162	36748163
chr1	36977202	36977203
chr1	37277082	37277083
chr1	37389904	37389905
chr1	37569190	37569191
chr1	37929184	37929185
chr1	37947359	37947360
chr1	38013849	38013850
chr1	38187029	38187030
chr1	38904968	38904969
chr1	39771224	39771225
chr1	39792972	39792973
chr1	39806758	39806759
chr1	39816485	39816486
chr1	39819078	39819079
chr1	39862668	39862669
chr1	39998846	39998847
chr1	40001551	40001552
chr1	40004561	40004562
chr1	40174638	40174639
chr1	41084649	41084650
chr1	41214776	41214777
chr1	41612809	41612810
chr1	41662101	41662102
chr1	41662798	41662799
chr1	41709652	41709653
chr1	42595572	42595573
chr1	42596780	42596781
chr1	42741396	42741397
chr1	42750410	42750411
chr1	42751061	42751062
chr1	42752615	42752616
chr1	42907851	42907852
chr1	43374159	43374160
chr1	43453506	43453507
chr1	43588369	43588370
chr1	43751836	43751837
chr1	43752219	43752220
chr1	43755520	43755521
chr1	43787484	43787485
chr1	43794997	43794998
chr1	43990395	43990396
chr1	44175242	44175243
chr1	45894703	45894704
chr1	46909508	46909509
chr1	51329572	51329573
chr1	52053901	52053902
chr1	52170743	52170744
chr1	52654321	52654322
chr1	52902059	52902060
chr1	54704313	54704314
chr1	55145408	55145409
chr1	55218195	55218196
chr1	55799030	55799031
chr1	57030201	57030202
chr1	57444987	57444988
chr1	57463475	57463476
chr1	57690964	57690965
chr1	58086696	58086697
chr1	58087574	58087575
chr1	58502672	58502673
chr1	58623416	58623417
chr1	59741861	59741862
chr1	59890664	59890665
chr1	60154831	60154832
chr1	61255568	61255569
chr1	61291140	61291141
chr1	61959745	61959746
chr1	62796502	62796503
chr1	62830847	62830848
chr1	63161320	63161321
chr1	63223935	63223936
chr1	63237650	63237651
chr1	63777118	63777119
chr1	64167873	64167874
chr1	64168902	64168903
chr1	64189498	64189499
chr1	64236195	64236196
chr1	66233817	66233818
chr1	66370282	66370283
chr1	66736100	66736101
chr1	66739450	66739451
chr1	69900252	69900253
chr1	70426788	70426789
chr1	71044328	71044329
chr1	71603905	71603906
chr1	72188658	72188659
chr1	72291004	72291005
chr1	72354023	72354024
chr1	72639986	72639987
chr1	72757767	72757768
chr1	72766935	72766936
chr1	72786408	72786409
chr1	72798286	72798287
chr1	72872096	72872097
chr1	72876848	72876849
chr1	73317675	73317676
chr1	73687897	73687898
chr1	73689469	73689470
chr1	73871145	73871146
chr1	73897127	73897128
chr1	74158086	74158087
chr1	74342569	74342570
chr1	74378986	74378987
chr1	74444313	74444314
chr1	74552475	74552476
chr1	74647823	74647824
chr1	75011169	75011170
chr1	75139055	75139056
chr1	75176817	75176818
chr1	75188924	75188925
chr1	75456034	75456035
chr1	75518051	75518052
chr1	78485569	78485570
chr1	78534240	78534241
chr1	78816395	78816396
chr1	79694090	79694091
chr1	79772615	79772616
chr1	79829514	79829515
chr1	79857445	79857446
chr1	79914468	79914469
chr1	80020219	80020220
chr1	80029126	80029127
chr1	80235580	80235581
chr1	80633998	80633999
chr1	80705954	80705955
chr1	80851140	80851141
chr1	81277885	81277886
chr1	82147588	82147589
chr1	82279770	82279771
chr1	82473514	82473515
chr1	83903785	83903786
chr1	87791057	87791058
chr1	87798889	87798890
chr1	87928986	87928987
chr1	87950043	87950044
chr1	87950391	87950392
chr1	87961077	87961078
chr1	88204178	88204179
chr1	88255368	88255369
chr1	88332367	88332368
chr1	88337206	88337207
chr1	88338889	88338890
chr1	88400889	88400890
chr1	88406177	88406178
chr1	88422308	88422309
chr1	88424831	88424832
chr1	88427991	88427992
chr1	88639620	88639621
chr1	89110530	89110531
chr1	89170203	89170204
chr1	89683041	89683042
chr1	89776511	89776512
chr1	89788461	89788462
chr1	89904805	89904806
chr1	90173941	90173942
chr1	90371379	90371380
chr1	90374909	90374910
chr1	90519970	90519971
chr1	90555047	90555048
chr1	90596847	90596848
chr1	90706642	90706643
chr1	91132143	91132144
chr1	91297606	91297607
chr1	91310012	91310013
chr1	91321253	91321254
chr1	91414178	91414179
chr1	91473729	91473730
chr1	91540730	91540731
chr1	91553368	91553369
chr1	91831364	91831365
chr1	92175855	92175856
chr1	92864334	92864335
chr1	92869868	92869869
chr1	92871711	92871712
chr1	92896107	92896108
chr1	92935809	92935810
chr1	92949170	92949171
chr1	92952558	92952559
chr1	92961686	92961687
chr1	93078441	93078442
chr1	93106128	93106129
chr1	93422515	93422516
chr1	93497448	93497449
chr1	93996305	93996306
chr1	94033911	94033912
chr1	94092576	94092577
chr1	94108892	94108893
chr1	94109125	94109126
chr1	94831092	94831093
chr1	94832390	94832391
chr1	94998191	94998192
chr1	95107145	95107146
chr1	95117152	95117153
chr1	95376234	95376235
chr1	95565500	95565501
chr1	95698491	95698492
chr1	95700277	95700278
chr1	97165029	97165030
chr1	99450668	99450669
chr1	99557317	99557318
chr1	99666753	99666754
chr1	99759980	99759981
chr1	99945084	99945085
chr1	106643556	106643557
chr1	106734912	106734913
chr1	106745746	106745747
chr1	108070443	108070444
chr1	108096358	108096359
chr1	108098773	108098774
chr1	108137721	108137722
chr1	108140217	108140218
chr1	108324978	108324979
chr1	108611343	108611344
chr1	108656228	108656229
chr1	108693411	108693412
chr1	108766808	108766809
chr1	109999175	109999176
chr1	115255012	115255013
chr1	115313679	115313680
chr1	120207864	120207865
chr1	120218417	120218418
chr1	120353950	120353951
chr1	120373589	120373590
chr1	120546970	120546971
chr1	121156192	121156193
chr1	121350470	121350471
chr1	121360233	121360234
chr1	121414749	121414750
chr1	121423004	121423005
chr1	121775790	121775791
chr1	122012406	122012407
chr1	122016022	122016023
chr1	122017793	122017794
chr1	122498860	122498861
chr1	122983889	122983890
chr1	123224658	123224659
chr1	123464504	123464505
chr1	127456926	127456927
chr1	127536567	127536568
chr1	128381453	128381454
chr1	128580851	128580852
chr1	128726981	128726982
chr1	129004282	129004283
chr1	129265331	129265332
chr1	129321796	129321797
chr1	130000405	130000406
chr1	130256225	130256226
chr1	130313350	130313351
chr1	130488720	130488721
chr1	132892267	132892268
chr1	132975593	132975594
chr1	133030906	133030907
chr1	133248254	133248255
chr1	133275562	133275563
chr1	133328639	133328640
chr1	133370437	133370438
chr1	133379105	133379106
chr1	133380307	133380308
chr1	133386109	133386110
chr1	133420618	133420619
chr1	133422459	133422460
chr1	133424554	133424555
chr1	133648679	133648680
chr1	133662221	133662222
chr1	133806835	133806836
chr1	133807854	133807855
chr1	133808215	133808216
chr1	134119048	134119049
chr1	134330218	134330219
chr1	134373747	134373748
chr1	134930509	134930510
chr1	135027858	135027859
chr1	135557878	135557879
chr1	135960212	135960213
chr1	136129639	136129640
chr1	136391163	136391164
chr1	137044341	137044342
chr1	137092687	137092688
chr1	137210394	137210395
chr1	137412205	137412206
chr1	137445489	137445490
chr1	137454955	137454956
chr1	137464790	137464791
chr1	137477746	137477747
chr1	137556355	137556356
chr1	137566570	137566571
chr1	137583218	137583219
chr1	137631460	137631461
chr1	138039144	138039145
chr1	138228676	138228677
chr1	138353018	138353019
chr1	138359325	138359326
chr1	138521170	138521171
chr1	138665807	138665808
chr1	139514294	139514295
chr1	139795217	139795218
chr1	139797097	139797098
chr1	139799663	139799664
chr1	139800097	139800098
chr1	139824405	139824406
chr1	139824746	139824747
chr1	139825339	139825340
chr1	140045660	140045661
chr1	140222937	140222938
chr1	140889115	140889116
chr1	140946678	140946679
chr1	141243280	141243281
chr1	145042394	145042395
chr1	145488043	145488044
chr1	145587239	145587240
chr1	145851607	145851608
chr1	152239664	152239665
chr1	152606803	152606804
chr1	152720443	152720444
chr1	152737240	152737241
chr1	152789493	152789494
chr1	152839377	152839378
chr1	153084023	153084024
chr1	153190242	153190243
chr1	153275924	153275925
chr1	153792596	153792597
chr1	154012745	154012746
chr1	154050516	154050517
chr1	154257964	154257965
chr1	154308854	154308855
chr1	154309223	154309224
chr1	154309557	154309558
chr1	154333572	154333573
chr1	154472498	154472499
chr1	154665178	154665179
chr1	154761240	154761241
chr1	154861692	154861693
chr1	154931472	154931473
chr1	155049524	155049525
chr1	155156228	155156229
chr1	155179200	155179201
chr1	155482818	155482819
chr1	155552293	155552294
chr1	155577930	155577931
chr1	155747220	155747221
chr1	155821591	155821592
chr1	155950302	155950303
chr1	155997470	155997471
chr1	156961276	156961277
chr1	157060235	157060236
chr1	157071572	157071573
chr1	157081365	157081366
chr1	158684850	158684851
chr1	158969455	158969456
chr1	159348295	159348296
chr1	159356372	159356373
chr1	159437528	159437529
chr1	159438222	159438223
chr1	159448418	159448419
chr1	160240730	160240731
chr1	160293199	160293200
chr1	160571669	160571670
chr1	161162171	161162172
chr1	161343607	161343608
chr1	161345917	161345918
chr1	161424252	161424253
chr1	161475225	161475226
chr1	161600847	161600848
chr1	161671413	161671414
chr1	161671938	161671939
chr1	161691271	161691272
chr1	162125289	162125290
chr1	162141934	162141935
chr1	162143300	162143301
chr1	162786102	162786103
chr1	162965762	162965763
chr1	162966735	162966736
chr1	163001036	163001037
chr1	163061665	163061666
chr1	163180357	163180358
chr1	163181571	163181572
chr1	163899352	163899353
chr1	163930303	163930304
chr1	164127158	164127159
chr1	164224813	164224814
chr1	164478572	164478573
chr1	164500380	164500381
chr1	164762546	164762547
chr1	165268083	165268084
chr1	165334001	165334002
chr1	165924875	165924876
chr1	166179792	166179793
chr1	166237427	166237428
chr1	166918441	166918442
chr1	167124780	167124781
chr1	167519556	167519557
chr1	167572138	167572139
chr1	167844415	167844416
chr1	167933360	167933361
chr1	168309119	168309120
chr1	169170305	169170306
chr1	169200200	169200201
chr1	169213941	169213942
chr1	169238921	169238922
chr1	169324318	169324319
chr1	170146242	170146243
chr1	170221647	170221648
chr1	170285211	170285212
chr1	171414943	171414944
chr1	171415652	171415653
chr1	171899450	171899451
chr1	172355221	172355222
chr1	172390244	172390245
chr1	172635269	172635270
chr1	172651948	172651949
chr1	172798831	172798832
chr1	172815241	172815242
chr1	173033408	173033409
chr1	173042341	173042342
chr1	173193218	173193219
chr1	173211069	173211070
chr1	173275928	173275929
chr1	173342319	173342320
chr1	173342798	173342799
chr1	173433553	173433554
chr1	174079008	174079009
chr1	174240286	174240287
chr1	174280182	174280183
chr1	177315927	177315928
chr1	177555831	177555832
chr1	177810987	177810988
chr1	178743475	178743476
chr1	178744854	178744855
chr1	178944180	178944181
chr1	179105664	179105665
chr1	179341683	179341684
chr1	179374755	179374756
chr1	179377862	179377863
chr1	179503651	179503652
chr1	179553631	179553632
chr1	179570772	179570773
chr1	180248382	180248383
chr1	180249513	180249514
chr1	180266624	180266625
chr1	180288547	180288548
chr1	180335650	180335651
chr1	181077161	181077162
chr1	181448065	181448066
chr1	181476383	181476384
chr1	181733144	181733145
chr1	182295488	182295489
chr1	182499202	182499203
chr1	182743044	182743045
chr1	182778912	182778913
chr1	182834718	182834719
chr1	182875955	182875956
chr1	182945893	182945894
chr1	182946849	182946850
chr1	183074464	183074465
chr1	183074785	183074786
chr1	183282524	183282525
chr1	183324082	183324083
chr1	183376265	183376266
chr1	183568327	183568328
chr1	183781048	183781049
chr1	183790969	183790970
chr1	183983286	183983287
chr1	184017298	184017299
chr1	184020001	184020002
chr1	184033743	184033744
chr1	184044147	184044148
chr1	184328429	184328430
chr1	184392080	184392081
chr1	184405313	184405314
chr1	184613176	184613177
chr1	184838631	184838632
chr1	184849052	184849053
chr1	184849382	184849383
chr1	185616377	185616378
chr1	185857954	185857955
chr1	186265092	186265093
chr1	186272916	186272917
chr1	186277798	186277799
chr1	187025106	187025107
chr1	187156209	187156210
chr1	188451687	188451688
chr1	188573144	188573145
chr1	190804068	190804069
chr1	190839544	190839545
chr1	191011756	191011757
chr1	191134203	191134204
chr1	191452420	191452421
chr1	191512288	191512289
chr1	191904160	191904161
chr1	191961998	191961999
chr1	192506089	192506090
chr1	192735672	192735673
chr1	192887004	192887005
chr1	192946783	192946784
chr1	193048609	193048610
chr1	193149763	193149764
chr1	193293150	193293151
chr1	193398778	193398779
chr1	193400020	193400021
chr1	193632764	193632765
chr1	193805563	193805564
chr1	194956427	194956428
chr1	195164711	195164712
chr1	195578261	195578262
chr1	196053218	196053219
chr1	196057641	196057642
chr1	196187650	196187651
chr1	196446479	196446480
chr1	196566206	196566207
chr1	196569249	196569250
chr1	196634787	196634788
chr1	196643228	196643229
chr1	196957206	196957207
chr1	197067914	197067915
chr10	3228056	3228057
chr10	6113210	6113211
chr10	6225750	6225751
chr10	6266323	6266324
chr10	6267459	6267460
chr10	6372819	6372820
chr10	6373411	6373412
chr10	6649403	6649404
chr10	6650904	6650905
chr10	6715700	6715701
chr10	6836561	6836562
chr10	7302117	7302118
chr10	7325138	7325139
chr10	7400814	7400815
chr10	7896311	7896312
chr10	7896660	7896661
chr10	8043161	8043162
chr10	8435824	8435825
chr10	8521113	8521114
chr10	8524285	8524286
chr10	8606240	8606241
chr10	10481330	10481331
chr10	12642409	12642410
chr10	13272943	13272944
chr10	14052758	14052759
chr10	14202422	14202423
chr10	17276476	17276477
chr10	17442148	17442149
chr10	17442897	17442898
chr10	18189652	18189653
chr10	20635611	20635612
chr10	20672076	20672077
chr10	20879816	20879817
chr10	21356554	21356555
chr10	21643417	21643418
chr10	21643688	21643689
chr10	22451565	22451566
chr10	22466311	22466312
chr10	23031445	23031446
chr10	23394740	23394741
chr10	23507159	23507160
chr10	23995499	23995500
chr10	24324833	24324834
chr10	24589671	24589672
chr10	24672539	24672540
chr10	24743808	24743809
chr10	25091957	25091958
chr10	25092467	25092468
chr10	26280497	26280498
chr10	27887140	27887141
chr10	30320131	30320132
chr10	30347524	30347525
chr10	30893214	30893215
chr10	32589519	32589520
chr10	32601962	32601963
chr10	32900040	32900041
chr10	36693964	36693965
chr10	36797918	36797919
chr10	36798489	36798490
chr10	36859302	36859303
chr10	36860611	36860612
chr10	36890492	36890493
chr10	36970795	36970796
chr10	37035054	37035055
chr10	37097924	37097925
chr10	37098191	37098192
chr10	37403035	37403036
chr10	38275165	38275166
chr10	38575053	38575054
chr10	38628287	38628288
chr10	38892993	38892994
chr10	38947578	38947579
chr10	38959871	38959872
chr10	38983184	38983185
chr10	39011188	39011189
chr10	39011970	39011971
chr10	39041255	39041256
chr10	39191751	39191752
chr10	39222299	39222300
chr10	39254362	39254363
chr10	39255342	39255343
chr10	39261362	39261363
chr10	39262138	39262139
chr10	39307306	39307307
chr10	39366612	39366613
chr10	39379468	39379469
chr10	39392479	39392480
chr10	39394901	39394902
chr10	39966805	39966806
chr10	39977609	39977610
chr10	39978456	39978457
chr10	40020580	40020581
chr10	40092279	40092280
chr10	40136987	40136988
chr10	40239729	40239730
chr10	40690775	40690776
chr10	40757710	40757711
chr10	41529347	41529348
chr10	41530603	41530604
chr10	41654839	41654840
chr10	41998119	41998120
chr10	42066191	42066192
chr10	42067002	42067003
chr10	42130681	42130682
chr10	42652883	42652884
chr10	42836460	42836461
chr10	43198256	43198257
chr10	44373914	44373915
chr10	44717488	44717489
chr10	44804508	44804509
chr10	44849124	44849125
chr10	45591003	45591004
chr10	46822611	46822612
chr10	47085103	47085104
chr10	52462567	52462568
chr10	56097400	56097401
chr10	56097824	56097825
chr10	56655134	56655135
chr10	57427924	57427925
chr10	57464381	57464382
chr10	57785749	57785750
chr10	58063915	58063916
chr10	58067597	58067598
chr10	58082196	58082197
chr10	58684750	58684751
chr10	58748523	58748524
chr10	58797814	58797815
chr10	59130364	59130365
chr10	59362153	59362154
chr10	59379085	59379086
chr10	59725339	59725340
chr10	59748634	59748635
chr10	59908093	59908094
chr10	60674679	60674680
chr10	60740770	60740771
chr10	60828791	60828792
chr10	60835513	60835514
chr10	60843208	60843209
chr10	60865873	60865874
chr10	61783444	61783445
chr10	61819249	61819250
chr10	61864773	61864774
chr10	61912634	61912635
chr10	62064964	62064965
chr10	62328076	62328077
chr10	62349780	62349781
chr10	62486885	62486886
chr10	62707767	62707768
chr10	63343259	63343260
chr10	63440949	63440950
chr10	66384220	66384221
chr10	66406866	66406867
chr10	66457964	66457965
chr10	66481836	66481837
chr10	66488868	66488869
chr10	66648575	66648576
chr10	66649770	66649771
chr10	66689042	66689043
chr10	66750865	66750866
chr10	67011210	67011211
chr10	67011830	67011831
chr10	67375424	67375425
chr10	68021310	68021311
chr10	68815465	68815466
chr10	69057289	69057290
chr10	69754843	69754844
chr10	69995234	69995235
chr10	70111648	70111649
chr10	70291073	70291074
chr10	70521755	70521756
chr10	70621897	70621898
chr10	70701107	70701108
chr10	73245905	73245906
chr10	74415707	74415708
chr10	74429723	74429724
chr10	74499920	74499921
chr10	74928954	74928955
chr10	74980779	74980780
chr10	75147034	75147035
chr10	75167369	75167370
chr10	75290651	75290652
chr10	75291498	75291499
chr10	75716432	75716433
chr10	75931709	75931710
chr10	75976113	75976114
chr10	76706574	76706575
chr10	77046881	77046882
chr10	77086120	77086121
chr10	77471933	77471934
chr10	77647825	77647826
chr10	77707613	77707614
chr10	77768931	77768932
chr10	78033277	78033278
chr10	78033841	78033842
chr10	78054501	78054502
chr10	78186220	78186221
chr10	79270783	79270784
chr10	79316934	79316935
chr10	79321316	79321317
chr10	79395667	79395668
chr10	79397111	79397112
chr10	79422943	79422944
chr10	79447188	79447189
chr10	79502532	79502533
chr10	79511341	79511342
chr10	79516111	79516112
chr10	79526039	79526040
chr10	79533856	79533857
chr10	79605059	79605060
chr10	79612266	79612267
chr10	79614186	79614187
chr10	79622997	79622998
chr10	79631096	79631097
chr10	79635802	79635803
chr10	79711915	79711916
chr10	79722846	79722847
chr10	79724651	79724652
chr10	79727580	79727581
chr10	79765607	79765608
chr10	79783305	79783306
chr10	79849261	79849262
chr10	79850687	79850688
chr10	79862651	79862652
chr10	79869662	79869663
chr10	80024438	80024439
chr10	80040839	80040840
chr10	80065880	80065881
chr10	80141050	80141051
chr10	80205328	80205329
chr10	80317895	80317896
chr10	80319118	80319119
chr10	80320254	80320255
chr10	80363578	80363579
chr10	80400482	80400483
chr10	80462669	80462670
chr10	80523129	80523130
chr10	80637953	80637954
chr10	80638280	80638281
chr10	80645512	80645513
chr10	80729673	80729674
chr10	80782823	80782824
chr10	80783853	80783854
chr10	80847287	80847288
chr10	80874493	80874494
chr10	80879713	80879714
chr10	80959152	80959153
chr10	81014444	81014445
chr10	81069236	81069237
chr10	81106612	81106613
chr10	81817387	81817388
chr10	82321948	82321949
chr10	82323416	82323417
chr10	82447924	82447925
chr10	82524847	82524848
chr10	82579854	82579855
chr10	82605952	82605953
chr10	82625128	82625129
chr10	82822722	82822723
chr10	83100279	83100280
chr10	83523629	83523630
chr10	84039024	84039025
chr10	84085120	84085121
chr10	84109440	84109441
chr10	84149913	84149914
chr10	84219405	84219406
chr10	84235392	84235393
chr10	84426702	84426703
chr10	85071363	85071364
chr10	85379059	85379060
chr10	85379992	85379993
chr10	85420581	85420582
chr10	85838839	85838840
chr10	86167364	86167365
chr10	86282686	86282687
chr10	86952365	86952366
chr10	86955446	86955447
chr10	87390132	87390133
chr10	88289465	88289466
chr10	88913269	88913270
chr10	89194953	89194954
chr10	89843603	89843604
chr10	89945816	89945817
chr10	89946242	89946243
chr10	89957929	89957930
chr10	90633499	90633500
chr10	90644364	90644365
chr10	91182918	91182919
chr10	92738357	92738358
chr10	92739352	92739353
chr10	93199224	93199225
chr10	93235052	93235053
chr10	93263081	93263082
chr10	93351768	93351769
chr10	93352626	93352627
chr10	93592477	93592478
chr10	93635541	93635542
chr10	93661951	93661952
chr10	93757727	93757728
chr10	93768527	93768528
chr10	93876984	93876985
chr10	93925748	93925749
chr10	93986668	93986669
chr10	94172716	94172717
chr10	94292331	94292332
chr10	94498339	94498340
chr10	94605630	94605631
chr10	94662377	94662378
chr10	94964418	94964419
chr10	94977374	94977375
chr10	95557039	95557040
chr10	95653277	95653278
chr10	95771769	95771770
chr10	96153823	96153824
chr10	98212068	98212069
chr10	98212405	98212406
chr10	98320349	98320350
chr10	98550856	98550857
chr10	98594773	98594774
chr10	98634893	98634894
chr10	98666844	98666845
chr10	98725512	98725513
chr10	98726467	98726468
chr10	98728189	98728190
chr10	98728609	98728610
chr10	98730663	98730664
chr10	98731837	98731838
chr10	98996357	98996358
chr10	99033116	99033117
chr10	99101949	99101950
chr10	99404494	99404495
chr10	99574167	99574168
chr10	99950285	99950286
chr10	102831459	102831460
chr10	105012451	105012452
chr10	105226321	105226322
chr10	107570954	107570955
chr10	110357404	110357405
chr10	110390370	110390371
chr10	110791924	110791925
chr10	110946760	110946761
chr10	110977208	110977209
chr10	111103112	111103113
chr10	111373875	111373876
chr10	111410021	111410022
chr10	111815813	111815814
chr10	114688502	114688503
chr10	114906267	114906268
chr10	115024139	115024140
chr10	115455261	115455262
chr10	116172793	116172794
chr10	116500664	116500665
chr10	116532207	116532208
chr10	116872524	116872525
chr10	117229708	117229709
chr10	117486459	117486460
chr10	118492539	118492540
chr10	118655395	118655396
chr10	118677501	118677502
chr10	119052571	119052572
chr10	119121655	119121656
chr10	119128869	119128870
chr10	119664194	119664195
chr10	119859279	119859280
chr10	119863501	119863502
chr10	119914277	119914278
chr10	120061563	120061564
chr10	120123380	120123381
chr10	120201375	120201376
chr10	120643136	120643137
chr10	120866308	120866309
chr10	120908640	120908641
chr10	120937433	120937434
chr10	120938275	120938276
chr10	120942482	120942483
chr10	120943861	120943862
chr10	121063741	121063742
chr10	121177017	121177018
chr10	121274135	121274136
chr10	121756000	121756001
chr10	122321504	122321505
chr10	122324896	122324897
chr10	122423585	122423586
chr10	122530077	122530078
chr10	123786524	123786525
chr10	125162625	125162626
chr10	126079009	126079010
chr10	126342954	126342955
chr10	126467930	126467931
chr10	126479048	126479049
chr10	126500877	126500878
chr10	126726684	126726685
chr10	126727697	126727698
chr10	126748718	126748719
chr10	126959212	126959213
chr10	127042072	127042073
chr10	127058882	127058883
chr10	127104080	127104081
chr10	127112014	127112015
chr10	127452362	127452363
chr10	127495728	127495729
chr10	127496925	127496926
chr10	127520732	127520733
chr10	127648868	127648869
chr10	127669552	127669553
chr10	127740635	127740636
chr10	127759413	127759414
chr10	127774523	127774524
chr10	127781951	127781952
chr10	127846439	127846440
chr10	127983489	127983490
chr10	127984865	127984866
chr10	127985989	127985990
chr10	128002312	128002313
chr10	128003296	128003297
chr10	128141798	128141799
chr10	128242656	128242657
chr10	128259144	128259145
chr10	128346771	128346772
chr10	128347706	128347707
chr10	128355521	128355522
chr11	3023888	3023889
chr11	3071500	3071501
chr11	3079689	3079690
chr11	3082709	3082710
chr11	3093155	3093156
chr11	3102431	3102432
chr11	3188715	3188716
chr11	3232402	3232403
chr11	3237772	3237773
chr11	3473242	3473243
chr11	3549619	3549620
chr11	3814162	3814163
chr11	3863833	3863834
chr11	3996893	3996894
chr11	4074889	4074890
chr11	4116472	4116473
chr11	4128655	4128656
chr11	4236379	4236380
chr11	4538055	4538056
chr11	4562376	4562377
chr11	4691768	4691769
chr11	4703119	4703120
chr11	4749832	4749833
chr11	4968791	4968792
chr11	4999748	4999749
chr11	5089720	5089721
chr11	5120873	5120874
chr11	5215013	5215014
chr11	5218170	5218171
chr11	5291475	5291476
chr11	5662138	5662139
chr11	5688202	5688203
chr11	5778095	5778096
chr11	5780062	5780063
chr11	5900377	5900378
chr11	5975569	5975570
chr11	6007984	6007985
chr11	6019473	6019474
chr11	6060621	6060622
chr11	6100088	6100089
chr11	6167689	6167690
chr11	6304811	6304812
chr11	6316284	6316285
chr11	6426759	6426760
chr11	6428582	6428583
chr11	6526036	6526037
chr11	7105262	7105263
chr11	7111418	7111419
chr11	7366737	7366738
chr11	8048006	8048007
chr11	8154299	8154300
chr11	8324905	8324906
chr11	8346254	8346255
chr11	8397176	8397177
chr11	8554016	8554017
chr11	8563890	8563891
chr11	8948672	8948673
chr11	11009524	11009525
chr11	16491724	16491725
chr11	16569993	16569994
chr11	16652908	16652909
chr11	16732202	16732203
chr11	16835961	16835962
chr11	16841496	16841497
chr11	17111719	17111720
chr11	17911596	17911597
chr11	18015828	18015829
chr11	18481647	18481648
chr11	18918708	18918709
chr11	18919164	18919165
chr11	19012398	19012399
chr11	19824178	19824179
chr11	19825518	19825519
chr11	19931761	19931762
chr11	20131385	20131386
chr11	20232700	20232701
chr11	20233159	20233160
chr11	20247738	20247739
chr11	20377691	20377692
chr11	20555922	20555923
chr11	20814712	20814713
chr11	20815387	20815388
chr11	20823346	20823347
chr11	20841672	20841673
chr11	21271425	21271426
chr11	21471778	21471779
chr11	21917617	21917618
chr11	22248735	22248736
chr11	22337727	22337728
chr11	22773620	22773621
chr11	22890555	22890556
chr11	22890952	22890953
chr11	23205896	23205897
chr11	23567340	23567341
chr11	23671923	23671924
chr11	23979968	23979969
chr11	25000177	25000178
chr11	26287177	26287178
chr11	29072452	29072453
chr11	29426294	29426295
chr11	29447977	29447978
chr11	29674986	29674987
chr11	29824341	29824342
chr11	30061305	30061306
chr11	30371880	30371881
chr11	30854435	30854436
chr11	31269469	31269470
chr11	31613547	31613548
chr11	31634271	31634272
chr11	31668463	31668464
chr11	31670547	31670548
chr11	31707618	31707619
chr11	31738684	31738685
chr11	31747319	31747320
chr11	31807715	31807716
chr11	32057852	32057853
chr11	32135889	32135890
chr11	32144318	32144319
chr11	32230864	32230865
chr11	32239352	32239353
chr11	32489945	32489946
chr11	32519549	32519550
chr11	32681766	32681767
chr11	32701237	32701238
chr11	32846589	32846590
chr11	33062366	33062367
chr11	33063502	33063503
chr11	34646918	34646919
chr11	35583567	35583568
chr11	35612564	35612565
chr11	35670335	35670336
chr11	35706660	35706661
chr11	35741138	35741139
chr11	35747296	35747297
chr11	35790302	35790303
chr11	40506182	40506183
chr11	40508488	40508489
chr11	40547502	40547503
chr11	43198797	43198798
chr11	43309338	43309339
chr11	43361890	43361891
chr11	43456674	43456675
chr11	43609657	43609658
chr11	44275204	44275205
chr11	44309959	44309960
chr11	44332221	44332222
chr11	44333821	44333822
chr11	44510529	44510530
chr11	44553996	44553997
chr11	44821835	44821836
chr11	44901085	44901086
chr11	45768793	45768794
chr11	45839567	45839568
chr11	45870462	45870463
chr11	45876866	45876867
chr11	45879137	45879138
chr11	45882416	45882417
chr11	48613107	48613108
chr11	48614053	48614054
chr11	48669121	48669122
chr11	48670109	48670110
chr11	49540180	49540181
chr11	49577850	49577851
chr11	49578332	49578333
chr11	49744626	49744627
chr11	49838385	49838386
chr11	50023773	50023774
chr11	50106051	50106052
chr11	50139508	50139509
chr11	50191374	50191375
chr11	50744850	50744851
chr11	51433342	51433343
chr11	51636924	51636925
chr11	51781240	51781241
chr11	52045313	52045314
chr11	52147227	52147228
chr11	52173806	52173807
chr11	53113105	53113106
chr11	53114389	53114390
chr11	53138316	53138317
chr11	53165322	53165323
chr11	53283780	53283781
chr11	53305609	53305610
chr11	53309521	53309522
chr11	53520824	53520825
chr11	53936010	53936011
chr11	54537973	54537974
chr11	54538374	54538375
chr11	54567870	54567871
chr11	54626371	54626372
chr11	54673949	54673950
chr11	54674335	54674336
chr11	54694795	54694796
chr11	54828932	54828933
chr11	54829684	54829685
chr11	54836711	54836712
chr11	54845623	54845624
chr11	55017848	55017849
chr11	55237490	55237491
chr11	55241723	55241724
chr11	55274459	55274460
chr11	55282406	55282407
chr11	57362554	57362555
chr11	57366735	57366736
chr11	57411882	57411883
chr11	57534721	57534722
chr11	57587599	57587600
chr11	57822081	57822082
chr11	57981585	57981586
chr11	57985204	57985205
chr11	58116380	58116381
chr11	58660695	58660696
chr11	58717182	58717183
chr11	59005076	59005077
chr11	59572966	59572967
chr11	59622899	59622900
chr11	59652871	59652872
chr11	59859934	59859935
chr11	59995905	59995906
chr11	60086913	60086914
chr11	60125000	60125001
chr11	60230507	60230508
chr11	60268016	60268017
chr11	60351072	60351073
chr11	60590864	60590865
chr11	60624631	60624632
chr11	60644065	60644066
chr11	60691880	60691881
chr11	60693049	60693050
chr11	60917914	60917915
chr11	60988421	60988422
chr11	61162994	61162995
chr11	61221757	61221758
chr11	61222497	61222498
chr11	61307814	61307815
chr11	61343046	61343047
chr11	61347264	61347265
chr11	61883968	61883969
chr11	62091850	62091851
chr11	62269933	62269934
chr11	62271919	62271920
chr11	62337860	62337861
chr11	62364456	62364457
chr11	62364906	62364907
chr11	62365241	62365242
chr11	62416310	62416311
chr11	62416954	62416955
chr11	62603111	62603112
chr11	62780464	62780465
chr11	62781063	62781064
chr11	62811480	62811481
chr11	62949283	62949284
chr11	63892691	63892692
chr11	64792532	64792533
chr11	66866361	66866362
chr11	67332794	67332795
chr11	67399913	67399914
chr11	67402296	67402297
chr11	67611658	67611659
chr11	67863074	67863075
chr11	67864453	67864454
chr11	67959227	67959228
chr11	68009829	68009830
chr11	68013354	68013355
chr11	68019474	68019475
chr11	68029779	68029780
chr11	68532787	68532788
chr11	68821867	68821868
chr11	68825686	68825687
chr11	68829658	68829659
chr11	68859361	68859362
chr11	68875925	68875926
chr11	68876408	68876409
chr11	68884304	68884305
chr11	68887196	68887197
chr11	68890198	68890199
chr11	68908595	68908596
chr11	68912262	68912263
chr11	69137213	69137214
chr11	69139753	69139754
chr11	69154328	69154329
chr11	69209315	69209316
chr11	69222985	69222986
chr11	69224673	69224674
chr11	69229028	69229029
chr11	69231318	69231319
chr11	69232466	69232467
chr11	69393856	69393857
chr11	69395063	69395064
chr11	69476114	69476115
chr11	69484697	69484698
chr11	69486090	69486091
chr11	69495536	69495537
chr11	69499512	69499513
chr11	69500179	69500180
chr11	69572192	69572193
chr11	69659764	69659765
chr11	69705274	69705275
chr11	69714915	69714916
chr11	69727416	69727417
chr11	69733667	69733668
chr11	69734140	69734141
chr11	69735317	69735318
chr11	69793653	69793654
chr11	69804504	69804505
chr11	69814015	69814016
chr11	70223804	70223805
chr11	70245681	70245682
chr11	70265456	70265457
chr11	70265805	70265806
chr11	70658824	70658825
chr11	70685420	70685421
chr11	70796418	70796419
chr11	70818038	70818039
chr11	71565329	71565330
chr11	71567357	71567358
chr11	71572173	71572174
chr11	71577095	71577096
chr11	71584199	71584200
chr11	71799016	71799017
chr11	71900329	71900330
chr11	72028940	72028941
chr11	72254918	72254919
chr11	72422096	72422097
chr11	72503632	72503633
chr11	74466392	74466393
chr11	74540240	74540241
chr11	74643856	74643857
chr11	74645023	74645024
chr11	74712162	74712163
chr11	74795253	74795254
chr11	74826666	74826667
chr11	74945940	74945941
chr11	74960697	74960698
chr11	74970812	74970813
chr11	75003965	75003966
chr11	75022658	75022659
chr11	75084597	75084598
chr11	75268214	75268215
chr11	75274206	75274207
chr11	75274557	75274558
chr11	75345345	75345346
chr11	75444287	75444288
chr11	75993244	75993245
chr11	76030617	76030618
chr11	76057298	76057299
chr11	76220385	76220386
chr11	76232122	76232123
chr11	76263380	76263381
chr11	76460881	76460882
chr11	76577109	76577110
chr11	76649986	76649987
chr11	76668427	76668428
chr11	76724954	76724955
chr11	76725572	76725573
chr11	76875696	76875697
chr11	77305293	77305294
chr11	77321717	77321718
chr11	77594836	77594837
chr11	77642966	77642967
chr11	77663970	77663971
chr11	77707060	77707061
chr11	77707952	77707953
chr11	77845738	77845739
chr11	77858415	77858416
chr11	77908552	77908553
chr11	77966491	77966492
chr11	77976209	77976210
chr11	77977799	77977800
chr11	77991307	77991308
chr11	77992474	77992475
chr11	77996919	77996920
chr11	78029502	78029503
chr11	78038355	78038356
chr11	78136611	78136612
chr11	78137741	78137742
chr11	78279585	78279586
chr11	78309616	78309617
chr11	78311235	78311236
chr11	78349172	78349173
chr11	78349901	78349902
chr11	78363814	78363815
chr11	78640458	78640459
chr11	79460242	79460243
chr11	79460653	79460654
chr11	79543532	79543533
chr11	79552366	79552367
chr11	79606411	79606412
chr11	79775662	79775663
chr11	79806061	79806062
chr11	79955376	79955377
chr11	80149356	80149357
chr11	80332342	80332343
chr11	82721833	82721834
chr11	83112175	83112176
chr11	83116183	83116184
chr11	83279649	83279650
chr11	83280936	83280937
chr11	83369991	83369992
chr11	83755602	83755603
chr11	83993804	83993805
chr11	84326726	84326727
chr11	84633015	84633016
chr11	84642595	84642596
chr11	84693759	84693760
chr11	84724112	84724113
chr11	85166292	85166293
chr11	85391658	85391659
chr11	85730137	85730138
chr11	85809111	85809112
chr11	86015179	86015180
chr11	86071123	86071124
chr11	86297798	86297799
chr11	86298279	86298280
chr11	86497609	86497610
chr11	86571173	86571174
chr11	86621360	86621361
chr11	86922092	86922093
chr11	87236683	87236684
chr11	87240373	87240374
chr11	87240991	87240992
chr11	87256237	87256238
chr11	87257106	87257107
chr11	87262542	87262543
chr11	87276262	87276263
chr11	87284392	87284393
chr11	87666744	87666745
chr11	87860877	87860878
chr11	87932882	87932883
chr11	87933352	87933353
chr11	87974910	87974911
chr11	87986642	87986643
chr11	87994810	87994811
chr11	88066574	88066575
chr11	88206437	88206438
chr11	88273628	88273629
chr11	88285590	88285591
chr11	88342686	88342687
chr11	88356637	88356638
chr11	88364718	88364719
chr11	88403319	88403320
chr11	88469313	88469314
chr11	88710885	88710886
chr11	90231145	90231146
chr11	90252235	90252236
chr11	90279542	90279543
chr11	93349419	93349420
chr11	93423929	93423930
chr11	93682986	93682987
chr11	93690109	93690110
chr11	93690785	93690786
chr11	93748224	93748225
chr11	93817076	93817077
chr11	93828972	93828973
chr11	93829588	93829589
chr11	93906537	93906538
chr11	94006681	94006682
chr11	94021976	94021977
chr11	94094955	94094956
chr11	94138553	94138554
chr11	94189166	94189167
chr11	94410235	94410236
chr11	94491527	94491528
chr11	94515200	94515201
chr11	94819471	94819472
chr11	94851033	94851034
chr11	95231466	95231467
chr11	95246091	95246092
chr11	95253822	95253823
chr11	95275137	95275138
chr11	95528010	95528011
chr11	95574993	95574994
chr11	95720969	95720970
chr11	95896049	95896050
chr11	95929765	95929766
chr11	95936823	95936824
chr11	96624601	96624602
chr11	96690937	96690938
chr11	96691626	96691627
chr11	96701794	96701795
chr11	96777517	96777518
chr11	96778102	96778103
chr11	97048351	97048352
chr11	97050002	97050003
chr11	97211606	97211607
chr11	97232270	97232271
chr11	97261746	97261747
chr11	97491320	97491321
chr11	97556234	97556235
chr11	97563997	97563998
chr11	97564535	97564536
chr11	97643593	97643594
chr11	97654705	97654706
chr11	97673077	97673078
chr11	97674709	97674710
chr11	97680047	97680048
chr11	97887874	97887875
chr11	98011947	98011948
chr11	98412286	98412287
chr11	98569631	98569632
chr11	98608921	98608922
chr11	98611832	98611833
chr11	98635089	98635090
chr11	98635469	98635470
chr11	98636651	98636652
chr11	98644884	98644885
chr11	98650471	98650472
chr11	98724904	98724905
chr11	98792959	98792960
chr11	98828221	98828222
chr11	98832715	98832716
chr11	98927519	98927520
chr11	98980673	98980674
chr11	100181842	100181843
chr11	100252482	100252483
chr11	100389689	100389690
chr11	100406927	100406928
chr11	100443256	100443257
chr11	100484300	100484301
chr11	100563991	100563992
chr11	100573752	100573753
chr11	100731737	100731738
chr11	100801250	100801251
chr11	100808215	100808216
chr11	100956649	100956650
chr11	101010989	101010990
chr11	101177411	101177412
chr11	101303557	101303558
chr11	101316297	101316298
chr11	101329070	101329071
chr11	101338657	101338658
chr11	101423902	101423903
chr11	101519963	101519964
chr11	101549133	101549134
chr11	101620012	101620013
chr11	101731739	101731740
chr11	102017720	102017721
chr11	102110163	102110164
chr11	102170612	102170613
chr11	102196464	102196465
chr11	102269839	102269840
chr11	102742425	102742426
chr11	102864661	102864662
chr11	102976639	102976640
chr11	102977916	102977917
chr11	102978574	102978575
chr11	102993545	102993546
chr11	103107854	103107855
chr11	103559315	103559316
chr11	103651506	103651507
chr11	103702437	103702438
chr11	104133919	104133920
chr11	104304207	104304208
chr11	104499600	104499601
chr11	104987089	104987090
chr11	104987884	104987885
chr11	105214511	105214512
chr11	105450709	105450710
chr11	105927316	105927317
chr11	106077877	106077878
chr11	106117113	106117114
chr11	106137939	106137940
chr11	106362733	106362734
chr11	106363359	106363360
chr11	106539599	106539600
chr11	106650421	106650422
chr11	106663546	106663547
chr11	106974543	106974544
chr11	106985873	106985874
chr11	106992667	106992668
chr11	107050532	107050533
chr11	107188764	107188765
chr11	107202866	107202867
chr11	107220059	107220060
chr11	107278159	107278160
chr11	107332193	107332194
chr11	107340752	107340753
chr11	107374428	107374429
chr11	107454111	107454112
chr11	107604668	107604669
chr11	107645772	107645773
chr11	107737497	107737498
chr11	107826894	107826895
chr11	107941560	107941561
chr11	108011933	108011934
chr11	108042645	108042646
chr11	108120457	108120458
chr11	108819853	108819854
chr11	108873221	108873222
chr11	108894190	108894191
chr11	108986950	108986951
chr11	109287531	109287532
chr11	109334709	109334710
chr11	109473315	109473316
chr11	109509921	109509922
chr11	109511792	109511793
chr11	109615851	109615852
chr11	110927304	110927305
chr11	111627984	111627985
chr11	111679754	111679755
chr11	112368434	112368435
chr11	112907769	112907770
chr11	113005447	113005448
chr11	113043921	113043922
chr11	113053715	113053716
chr11	113545660	113545661
chr11	114329224	114329225
chr11	114530403	114530404
chr11	114565870	114565871
chr11	114656634	114656635
chr11	114657291	114657292
chr11	114657876	114657877
chr11	114933429	114933430
chr11	115138199	115138200
chr11	115183865	115183866
chr11	115221212	115221213
chr11	115244303	115244304
chr11	115245497	115245498
chr11	115336924	115336925
chr11	115352984	115352985
chr11	115375151	115375152
chr11	115375652	115375653
chr11	115425688	115425689
chr11	115465380	115465381
chr11	115627270	115627271
chr11	115640616	115640617
chr11	115794985	115794986
chr11	115816961	115816962
chr11	115873572	115873573
chr11	115892271	115892272
chr11	115948288	115948289
chr11	116029119	116029120
chr11	116029379	116029380
chr11	116080225	116080226
chr11	116482659	116482660
chr11	116490351	116490352
chr11	116523258	116523259
chr11	116533045	116533046
chr11	116704120	116704121
chr11	116933770	116933771
chr11	116938148	116938149
chr11	117099593	117099594
chr11	117128734	117128735
chr11	117129953	117129954
chr11	117130667	117130668
chr11	117158374	117158375
chr11	117174062	117174063
chr11	117178175	117178176
chr11	117179989	117179990
chr11	117193403	117193404
chr11	117193854	117193855
chr11	117199968	117199969
chr11	117206910	117206911
chr11	117271562	117271563
chr11	117333285	117333286
chr11	117340611	117340612
chr11	117343900	117343901
chr11	117488754	117488755
chr11	117641090	117641091
chr11	117686174	117686175
chr11	117734672	117734673
chr11	117815578	117815579
chr11	118059268	118059269
chr11	118073219	118073220
chr11	118151364	118151365
chr11	118188805	118188806
chr11	118446328	118446329
chr11	119059725	119059726
chr11	119071131	119071132
chr11	119090439	119090440
chr11	119129408	119129409
chr11	119352827	119352828
chr11	119384195	119384196
chr11	119407333	119407334
chr11	119464281	119464282
chr11	119570911	119570912
chr11	119572299	119572300
chr11	119628429	119628430
chr11	119634502	119634503
chr11	119664767	119664768
chr11	119679469	119679470
chr11	119685787	119685788
chr11	119695771	119695772
chr11	119725042	119725043
chr11	119775039	119775040
chr11	119806992	119806993
chr11	119901170	119901171
chr11	119903184	119903185
chr11	120004161	120004162
chr11	120051238	120051239
chr11	120085240	120085241
chr11	120094199	120094200
chr11	120099503	120099504
chr11	120101839	120101840
chr11	120116662	120116663
chr11	120121375	120121376
chr11	120123027	120123028
chr11	120205452	120205453
chr11	120219595	120219596
chr11	120345932	120345933
chr11	120352971	120352972
chr11	120434774	120434775
chr11	120459881	120459882
chr11	120504964	120504965
chr11	120574936	120574937
chr11	120637599	120637600
chr11	120794070	120794071
chr11	120851676	120851677
chr11	121090423	121090424
chr11	121098001	121098002
chr11	121534409	121534410
chr12	3235864	3235865
chr12	3426196	3426197
chr12	3841262	3841263
chr12	3871851	3871852
chr12	4082867	4082868
chr12	4234098	4234099
chr12	4234431	4234432
chr12	4775756	4775757
chr12	4824706	4824707
chr12	4850873	4850874
chr12	5220549	5220550
chr12	5275256	5275257
chr12	5705665	5705666
chr12	6630242	6630243
chr12	8364431	8364432
chr12	8479615	8479616
chr12	8680693	8680694
chr12	8682059	8682060
chr12	8778618	8778619
chr12	8928479	8928480
chr12	9120674	9120675
chr12	9139477	9139478
chr12	9942998	9942999
chr12	11211164	11211165
chr12	12232620	12232621
chr12	12691387	12691388
chr12	12911572	12911573
chr12	13136741	13136742
chr12	15711381	15711382
chr12	15765945	15765946
chr12	15808016	15808017
chr12	15818486	15818487
chr12	15819970	15819971
chr12	15822228	15822229
chr12	16163021	16163022
chr12	16441275	16441276
chr12	16481520	16481521
chr12	16539504	16539505
chr12	16576057	16576058
chr12	16596514	16596515
chr12	16598356	16598357
chr12	16625868	16625869
chr12	16637005	16637006
chr12	16650896	16650897
chr12	17355198	17355199
chr12	17397483	17397484
chr12	17552095	17552096
chr12	17563713	17563714
chr12	17564303	17564304
chr12	17564968	17564969
chr12	21138709	21138710
chr12	21142264	21142265
chr12	21166578	21166579
chr12	21233120	21233121
chr12	21292704	21292705
chr12	21423821	21423822
chr12	25269992	25269993
chr12	25285970	25285971
chr12	25327385	25327386
chr12	25393613	25393614
chr12	25578826	25578827
chr12	25862868	25862869
chr12	25917741	25917742
chr12	26294121	26294122
chr12	26556152	26556153
chr12	26797581	26797582
chr12	26830256	26830257
chr12	27227599	27227600
chr12	27825236	27825237
chr12	28022746	28022747
chr12	28023750	28023751
chr12	28024613	28024614
chr12	28027935	28027936
chr12	28042441	28042442
chr12	28331641	28331642
chr12	29145987	29145988
chr12	29224849	29224850
chr12	29287187	29287188
chr12	29502441	29502442
chr12	29689669	29689670
chr12	29975939	29975940
chr12	30349745	30349746
chr12	30361126	30361127
chr12	30383119	30383120
chr12	30387679	30387680
chr12	30553329	30553330
chr12	30557471	30557472
chr12	30567910	30567911
chr12	31876189	31876190
chr12	31898536	31898537
chr12	32184964	32184965
chr12	32266017	32266018
chr12	32319631	32319632
chr12	32339466	32339467
chr12	32589559	32589560
chr12	32590742	32590743
chr12	32602382	32602383
chr12	32635441	32635442
chr12	33563097	33563098
chr12	33611337	33611338
chr12	33639835	33639836
chr12	33720860	33720861
chr12	33795973	33795974
chr12	33847492	33847493
chr12	33878725	33878726
chr12	33910174	33910175
chr12	33921031	33921032
chr12	33970980	33970981
chr12	33987102	33987103
chr12	33999201	33999202
chr12	34114463	34114464
chr12	35213858	35213859
chr12	36883075	36883076
chr12	37868903	37868904
chr12	38050723	38050724
chr12	39234989	39234990
chr12	39504826	39504827
chr12	39506003	39506004
chr12	39515329	39515330
chr12	40647396	40647397
chr12	40683073	40683074
chr12	40949207	40949208
chr12	40950178	40950179
chr12	41625147	41625148
chr12	42828302	42828303
chr12	42978764	42978765
chr12	42978991	42978992
chr12	44073985	44073986
chr12	44945302	44945303
chr12	45311172	45311173
chr12	46026993	46026994
chr12	46114432	46114433
chr12	47003036	47003037
chr12	47298772	47298773
chr12	47318080	47318081
chr12	47747547	47747548
chr12	47971201	47971202
chr12	49705679	49705680
chr12	50030209	50030210
chr12	51650938	51650939
chr12	52449069	52449070
chr12	52449625	52449626
chr12	53936377	53936378
chr12	54037732	54037733
chr12	54134038	54134039
chr12	54134504	54134505
chr12	54225058	54225059
chr12	54225481	54225482
chr12	54247726	54247727
chr12	54348522	54348523
chr12	54393634	54393635
chr12	54507099	54507100
chr12	54688759	54688760
chr12	54724951	54724952
chr12	54944910	54944911
chr12	55019830	55019831
chr12	55083166	55083167
chr12	55293101	55293102
chr12	55388030	55388031
chr12	55798264	55798265
chr12	56085978	56085979
chr12	56087427	56087428
chr12	56404094	56404095
chr12	56548167	56548168
chr12	57796986	57796987
chr12	57883892	57883893
chr12	57930726	57930727
chr12	58567750	58567751
chr12	60114460	60114461
chr12	60162468	60162469
chr12	60230693	60230694
chr12	60232173	60232174
chr12	60321074	60321075
chr12	60923779	60923780
chr12	65330849	65330850
chr12	66066562	66066563
chr12	66174424	66174425
chr12	66273854	66273855
chr12	66483554	66483555
chr12	66514152	66514153
chr12	67716367	67716368
chr12	67741657	67741658
chr12	68321233	68321234
chr12	69564235	69564236
chr12	69950927	69950928
chr12	70259713	70259714
chr12	70269683	70269684
chr12	70465059	70465060
chr12	70472683	70472684
chr12	70602965	70602966
chr12	70783418	70783419
chr12	70784674	70784675
chr12	70915554	70915555
chr12	71297551	71297552
chr12	71728837	71728838
chr12	71820349	71820350
chr12	72038791	72038792
chr12	72116226	72116227
chr12	72149214	72149215
chr12	72152134	72152135
chr12	72237685	72237686
chr12	72380688	72380689
chr12	72395621	72395622
chr12	72395973	72395974
chr12	72499725	72499726
chr12	72500224	72500225
chr12	72956953	72956954
chr12	73034133	73034134
chr12	73035124	73035125
chr12	73045049	73045050
chr12	73055262	73055263
chr12	73374808	73374809
chr12	73375268	73375269
chr12	73380548	73380549
chr12	73466907	73466908
chr12	73534597	73534598
chr12	73861682	73861683
chr12	74343129	74343130
chr12	74387729	74387730
chr12	74509795	74509796
chr12	74510880	74510881
chr12	74773200	74773201
chr12	74774986	74774987
chr12	74869834	74869835
chr12	74880748	74880749
chr12	75065598	75065599
chr12	76525618	76525619
chr12	76770322	76770323
chr12	76836883	76836884
chr12	77297029	77297030
chr12	77356484	77356485
chr12	77866430	77866431
chr12	77938454	77938455
chr12	78056206	78056207
chr12	78063401	78063402
chr12	78121271	78121272
chr12	78328953	78328954
chr12	78861973	78861974
chr12	79201013	79201014
chr12	79253499	79253500
chr12	79326708	79326709
chr12	79962963	79962964
chr12	80028491	80028492
chr12	80147482	80147483
chr12	80273601	80273602
chr12	80292379	80292380
chr12	80398403	80398404
chr12	80608196	80608197
chr12	80781397	80781398
chr12	80833599	80833600
chr12	80852858	80852859
chr12	80951184	80951185
chr12	80993014	80993015
chr12	81012502	81012503
chr12	81026625	81026626
chr12	81071601	81071602
chr12	81163849	81163850
chr12	81214170	81214171
chr12	81269498	81269499
chr12	81331262	81331263
chr12	81347609	81347610
chr12	81744114	81744115
chr12	81744880	81744881
chr12	81745279	81745280
chr12	81788963	81788964
chr12	81928517	81928518
chr12	81928863	81928864
chr12	81945266	81945267
chr12	81959440	81959441
chr12	82695956	82695957
chr12	82743571	82743572
chr12	83270158	83270159
chr12	83377019	83377020
chr12	83387157	83387158
chr12	83470635	83470636
chr12	83509675	83509676
chr12	83513800	83513801
chr12	84443953	84443954
chr12	84826746	84826747
chr12	84827350	84827351
chr12	84828991	84828992
chr12	84973066	84973067
chr12	84973680	84973681
chr12	85263196	85263197
chr12	85291583	85291584
chr12	85350278	85350279
chr12	85496383	85496384
chr12	85522238	85522239
chr12	85528154	85528155
chr12	85529004	85529005
chr12	85558652	85558653
chr12	85590385	85590386
chr12	85792487	85792488
chr12	86114314	86114315
chr12	86125765	86125766
chr12	86248949	86248950
chr12	86253551	86253552
chr12	86311941	86311942
chr12	86517156	86517157
chr12	86535604	86535605
chr12	86680442	86680443
chr12	86691695	86691696
chr12	86715704	86715705
chr12	86796219	86796220
chr12	86814976	86814977
chr12	87203654	87203655
chr12	87207646	87207647
chr12	87315195	87315196
chr12	87341790	87341791
chr12	87985906	87985907
chr12	87988239	87988240
chr12	87993935	87993936
chr12	88111485	88111486
chr12	88122830	88122831
chr12	88127233	88127234
chr12	88131955	88131956
chr12	88142131	88142132
[truncated: 6,672 more rows]

## Sheet: NFI
chr1	3111456	3111814
chr1	3282490	3283017
chr1	3754864	3755183
chr1	4402632	4402945
chr1	4416868	4417292
chr1	4561849	4562022
chr1	4847537	4847788
chr1	4900817	4901031
chr1	4916353	4916638
chr1	4960736	4961009
chr1	5009376	5009669
chr1	5012669	5014065
chr1	5219014	5219194
chr1	6856946	6857274
chr1	9544732	9544958
chr1	9554507	9555020
chr1	9556022	9556206
chr1	9556430	9556709
chr1	9560020	9560670
chr1	9601639	9602100
chr1	9609617	9609852
chr1	9611631	9611936
chr1	9617371	9618084
chr1	9619799	9621357
chr1	9621548	9621958
chr1	9631377	9631698
chr1	11990613	11991032
chr1	12165097	12165280
chr1	12233825	12234016
chr1	12634698	12635075
chr1	12949778	12950113
chr1	13032515	13032695
chr1	13161196	13161583
chr1	13416484	13416707
chr1	13598587	13598870
chr1	13604715	13605061
chr1	13639785	13640004
chr1	13648722	13648989
chr1	13861019	13861253
chr1	13925968	13926605
chr1	13990740	13992144
chr1	13992641	13993017
chr1	14001568	14001911
chr1	14098498	14099018
chr1	14170354	14170654
chr1	14171629	14172299
chr1	14174409	14174717
chr1	14188995	14189416
chr1	14208770	14209308
chr1	14210999	14211301
chr1	14258356	14258564
chr1	14282035	14282739
chr1	14669665	14669855
chr1	15626992	15627213
chr1	15796218	15796437
chr1	16081852	16082102
chr1	16101760	16102294
chr1	16112899	16113299
chr1	16144986	16145314
chr1	16169301	16169551
chr1	16176715	16176895
chr1	16202654	16202908
chr1	16262257	16262530
chr1	16530876	16531092
chr1	16536668	16537008
chr1	16609507	16609731
chr1	16647858	16648084
chr1	16999791	17000027
chr1	17004028	17004351
chr1	17050054	17050477
chr1	17406978	17407158
chr1	17416792	17416978
chr1	17439355	17439736
chr1	17584422	17584625
chr1	17647411	17647803
chr1	19839997	19840493
chr1	19971349	19971530
chr1	20048401	20048766
chr1	20059786	20060216
chr1	20107461	20107735
chr1	20166534	20166814
chr1	20857485	20857913
chr1	20929230	20929457
chr1	20985467	20985695
chr1	21042679	21043302
chr1	21058597	21058859
chr1	21064385	21064565
chr1	21074874	21075096
chr1	21079703	21080086
chr1	21216078	21216275
chr1	21401398	21401967
chr1	21606798	21607034
chr1	21681887	21682166
chr1	21795049	21795518
chr1	21819986	21820190
chr1	21891433	21891685
chr1	22256664	22256831
chr1	22601647	22602039
chr1	22647436	22647783
chr1	22994453	22994651
chr1	23124389	23124571
chr1	23221624	23221957
chr1	23328177	23328710
chr1	23487644	23488022
chr1	23497606	23498248
chr1	23499944	23500228
chr1	23771578	23772006
chr1	23841758	23841962
chr1	23853144	23853572
chr1	24081181	24081607
chr1	24093109	24093319
chr1	24218957	24219201
chr1	24232918	24233367
chr1	24233855	24234253
chr1	24237262	24237830
chr1	24238394	24238686
chr1	24251886	24252137
chr1	24560359	24560683
chr1	24593252	24593432
chr1	24685294	24685553
chr1	24926634	24926875
chr1	25114231	25114859
chr1	25162244	25162570
chr1	25222855	25223195
chr1	25293247	25293474
chr1	25338365	25338654
chr1	25476245	25476565
chr1	25477562	25477892
chr1	25492461	25492644
chr1	25531356	25531581
chr1	25754160	25754388
chr1	25761180	25761360
chr1	25881351	25881860
chr1	25886960	25887139
chr1	25949161	25949609
chr1	25949777	25950241
chr1	28014025	28014209
chr1	30074463	30074745
chr1	30117701	30118065
chr1	30845948	30846221
chr1	31091473	31091708
chr1	31158469	31158907
chr1	31159785	31160245
chr1	31290518	31290768
chr1	33099263	33099666
chr1	33271763	33272039
chr1	33301562	33301829
chr1	33391061	33391253
chr1	33419955	33420129
chr1	33551693	33551964
chr1	33552457	33552812
chr1	33656133	33656444
chr1	33726559	33726769
chr1	33727192	33727373
chr1	33963830	33964106
chr1	33989944	33990317
chr1	34047807	34048037
chr1	34062159	34062486
chr1	34062604	34062952
chr1	34102591	34102778
chr1	34104250	34104430
chr1	34177001	34177308
chr1	34178129	34178797
chr1	34197513	34197902
chr1	34207548	34207975
chr1	34212222	34212451
chr1	34213054	34213265
chr1	34222846	34223186
chr1	34223924	34224896
chr1	34325363	34325701
chr1	34355508	34355832
chr1	34361089	34361335
chr1	34444898	34445119
chr1	34496641	34496821
chr1	34640547	34641122
chr1	34720859	34721706
chr1	34721772	34722523
chr1	34722995	34723697
chr1	34753455	34753735
chr1	34770895	34771102
chr1	34776842	34777276
chr1	35526263	35526481
chr1	35710184	35710713
chr1	35739492	35739729
chr1	35868115	35868632
chr1	36087195	36087688
chr1	36145175	36145467
chr1	36152318	36152676
chr1	36260788	36261041
chr1	36311925	36312183
chr1	36321061	36321270
chr1	36327535	36327870
chr1	36366204	36366741
chr1	36436428	36436659
chr1	36535123	36535428
chr1	36570174	36570534
chr1	36580313	36580809
chr1	36585135	36585586
chr1	36587880	36588068
chr1	36603845	36604332
chr1	36605154	36605372
chr1	36613381	36613694
chr1	36636861	36637328
chr1	36638226	36638469
chr1	36645252	36645444
chr1	36646384	36646647
chr1	36652964	36653330
chr1	36659979	36660756
chr1	36661190	36661659
chr1	36663835	36664502
chr1	36671997	36672403
chr1	36685551	36685829
chr1	36693227	36693885
chr1	36704558	36704813
chr1	36918595	36918936
chr1	36976936	36977463
chr1	36977684	36977965
chr1	36978404	36978593
chr1	37006324	37007066
chr1	37053427	37054088
chr1	37117844	37118231
chr1	37119928	37120266
chr1	37179151	37179532
chr1	37276843	37277324
chr1	37386758	37386965
chr1	37389596	37390041
chr1	37404063	37404756
chr1	37407669	37408078
chr1	37486721	37487033
chr1	37557605	37557815
chr1	37568872	37569588
chr1	37569800	37570050
chr1	37598046	37598384
chr1	37622436	37622604
chr1	37642622	37642876
chr1	37744450	37744730
chr1	37753798	37753986
chr1	37767110	37767305
chr1	37814390	37814576
chr1	37922189	37922436
chr1	38013449	38013927
chr1	38016538	38016730
chr1	38255367	38255669
chr1	38279075	38279470
chr1	38319343	38319549
chr1	38364767	38365306
chr1	38365632	38365870
chr1	38391045	38391400
chr1	38507501	38507940
chr1	38753150	38753407
chr1	38814558	38815079
chr1	38847960	38848139
chr1	38900090	38900427
chr1	38905054	38905246
chr1	39338315	39338572
chr1	39444433	39444613
chr1	39496466	39496847
chr1	39500637	39500956
chr1	39505105	39505370
chr1	39535610	39535925
chr1	39542583	39542791
chr1	39587172	39587353
chr1	39602455	39602896
chr1	39603031	39603412
chr1	39606766	39606946
chr1	39624980	39625250
chr1	39703182	39703571
chr1	39744099	39744279
chr1	39751718	39751980
chr1	39767447	39767883
chr1	39770610	39771553
chr1	39791217	39791700
chr1	39792713	39793182
chr1	39797836	39798097
chr1	39798353	39798546
chr1	39806524	39806872
chr1	39816182	39816757
chr1	39818213	39818511
chr1	39818856	39819136
chr1	39829723	39829956
chr1	39830891	39831137
chr1	39862163	39862866
chr1	39893312	39893489
chr1	39895567	39896054
chr1	39945264	39945576
chr1	39968540	39968641
chr1	39980250	39980602
chr1	39985776	39986095
chr1	39987950	39988213
chr1	39998578	39999026
chr1	40001302	40001772
chr1	40003967	40005142
chr1	40022225	40022464
chr1	40026673	40027129
chr1	40029335	40029553
chr1	40034107	40034455
chr1	40037268	40037562
chr1	40129043	40129266
chr1	40174457	40175029
chr1	40196561	40196994
chr1	40206156	40206385
chr1	40291115	40291382
chr1	40323162	40323423
chr1	40862272	40862538
chr1	40872189	40872678
chr1	40874656	40874934
chr1	40881414	40881765
chr1	40897506	40897723
chr1	40961571	40961819
chr1	41084352	41084913
chr1	41197386	41197617
chr1	41214617	41215425
chr1	41418517	41418732
chr1	41436908	41437253
chr1	41446920	41447683
chr1	41468582	41468863
chr1	41484778	41485057
chr1	41612443	41612916
chr1	41661886	41662290
chr1	41662550	41663265
chr1	41708622	41708980
chr1	41709276	41710237
chr1	41769816	41770120
chr1	41945037	41945405
chr1	41949304	41949593
chr1	41973727	41973916
chr1	42202464	42202816
chr1	42286464	42286873
chr1	42288081	42288412
chr1	42314741	42315090
chr1	42529442	42529632
chr1	42546349	42546682
chr1	42584592	42584845
chr1	42595486	42596898
chr1	42597175	42597372
chr1	42681807	42681987
chr1	42686551	42687082
chr1	42693363	42693707
chr1	42724495	42724791
chr1	42740721	42740901
chr1	42743773	42743956
chr1	42747063	42747320
chr1	42748344	42748771
chr1	42750270	42751273
chr1	42755111	42755438
chr1	42760701	42760889
chr1	42768079	42768314
chr1	42770196	42770559
chr1	42771178	42771453
chr1	42775491	42775596
chr1	42776003	42776146
chr1	42780741	42780918
chr1	42977670	42977910
chr1	43097920	43098096
chr1	43155204	43155409
chr1	43198336	43198724
chr1	43307226	43307481
chr1	43316712	43316978
chr1	43373850	43374713
chr1	43414954	43415402
chr1	43417535	43417875
chr1	43418278	43418623
chr1	43453415	43453687
chr1	43483471	43483791
chr1	43503596	43503848
chr1	43524547	43524887
chr1	43531095	43531543
chr1	43531770	43532121
chr1	43542526	43542784
chr1	43560235	43561475
chr1	43587475	43587659
chr1	43588085	43588535
chr1	43618915	43619195
chr1	43640504	43640834
chr1	43647710	43648117
chr1	43710183	43710377
chr1	43751125	43751368
chr1	43751541	43752275
chr1	43755211	43755934
chr1	43771752	43772083
chr1	43773077	43773256
chr1	43787226	43787823
chr1	43830763	43831313
chr1	43832958	43833293
chr1	43838051	43838294
chr1	43880246	43880561
chr1	43990311	43991031
chr1	44103525	44103705
chr1	44175576	44175891
chr1	44216204	44216393
chr1	44551606	44551863
chr1	44609254	44609636
chr1	44609971	44610352
chr1	44648558	44648959
chr1	45007913	45008241
chr1	45079021	45079317
chr1	45598881	45599069
chr1	45894593	45894982
chr1	45962006	45962437
chr1	46906640	46906902
chr1	50954609	50954858
chr1	51027755	51028008
chr1	51133073	51133565
chr1	51171608	51172124
chr1	51273059	51273688
chr1	51302215	51302544
chr1	51329054	51329234
chr1	51329463	51329977
chr1	51347402	51347962
chr1	51401131	51401395
chr1	51587248	51587508
chr1	51664189	51664573
chr1	51777273	51777455
chr1	51902537	51902815
chr1	51906781	51906996
chr1	51909172	51909600
chr1	51936310	51936591
chr1	51966165	51966402
chr1	52025817	52026265
chr1	52033482	52033882
chr1	52048004	52048346
chr1	52052886	52053179
chr1	52053488	52054240
chr1	52095947	52096302
chr1	52100102	52100451
chr1	52485025	52485244
chr1	52635389	52635619
chr1	52654109	52654533
chr1	52705126	52705440
chr1	52733513	52733869
chr1	52769835	52770303
chr1	52774997	52775202
chr1	52815118	52815402
chr1	52877485	52877802
chr1	53133588	53133842
chr1	53136785	53137036
chr1	53409594	53409803
chr1	53770152	53770395
chr1	53870946	53871219
chr1	53876936	53877174
chr1	53880608	53880956
chr1	53885941	53886319
chr1	53913649	53913845
chr1	54216459	54216679
chr1	54307357	54307666
chr1	54434361	54434705
chr1	54541791	54542134
chr1	54555634	54555814
chr1	54614379	54614562
chr1	54642432	54642714
chr1	54704147	54704537
chr1	54705080	54705428
chr1	54767429	54767653
chr1	54771972	54772677
chr1	54797820	54798365
chr1	54802500	54802842
chr1	54822776	54823163
chr1	54883447	54883960
chr1	54887080	54887480
chr1	54955575	54955755
chr1	54979523	54979941
chr1	55083421	55083658
chr1	55109313	55109535
chr1	55217769	55218528
chr1	55250176	55250545
chr1	55258628	55259142
chr1	55267235	55267514
chr1	55278278	55278550
chr1	55474186	55474383
chr1	55510980	55511344
chr1	55546036	55546665
chr1	55562796	55562976
chr1	55585536	55586126
chr1	55644920	55645184
chr1	55675516	55676168
chr1	55680785	55681132
chr1	55690192	55690455
chr1	55722707	55723034
chr1	55763961	55764208
chr1	55782342	55782646
chr1	55798764	55799261
chr1	55905686	55905943
chr1	55923811	55923991
chr1	56346681	56346861
chr1	56890287	56890494
chr1	57231183	57231517
chr1	57262556	57262750
chr1	57268521	57268776
chr1	57281313	57281995
chr1	57323636	57324132
chr1	57390780	57391056
chr1	57433976	57434221
chr1	57444642	57445141
chr1	57445314	57445538
chr1	57486587	57487180
chr1	57690714	57691192
chr1	57762941	57763159
chr1	57764779	57765094
chr1	57808687	57809031
chr1	57839185	57839449
chr1	57846642	57847149
chr1	57906862	57907053
chr1	57941787	57942125
chr1	57947042	57947702
chr1	57977577	57977848
chr1	58057373	58057583
chr1	58086373	58086900
chr1	58087216	58088007
chr1	58277888	58278046
chr1	58480878	58481070
chr1	58643027	58643312
chr1	58769477	58769657
chr1	58770751	58771066
chr1	58776045	58776229
chr1	59066208	59066463
chr1	59491028	59491283
chr1	59572984	59573604
chr1	59581041	59581273
chr1	59610820	59610979
chr1	59666781	59667028
chr1	59682293	59682561
chr1	59782360	59782896
chr1	59790941	59791283
chr1	59828803	59829113
chr1	59845912	59846189
chr1	59846626	59846985
chr1	59848730	59848908
chr1	59852287	59852544
chr1	59882364	59882595
chr1	59890644	59890847
chr1	59924963	59925264
chr1	59952360	59952708
chr1	60237678	60237874
chr1	60255811	60256191
chr1	60861075	60861294
chr1	61036381	61036559
chr1	61064433	61064681
chr1	61156689	61156990
chr1	61162012	61162255
chr1	61203041	61203598
chr1	61253540	61253730
chr1	61254956	61256204
chr1	61260145	61260434
chr1	61261999	61262179
chr1	61277960	61278329
chr1	61290982	61291624
chr1	61293372	61293710
chr1	61366513	61367151
chr1	61578130	61578408
chr1	61599482	61599781
chr1	61608813	61609004
chr1	61667619	61667892
chr1	61774937	61775117
chr1	61826510	61826902
chr1	61942689	61942949
chr1	61959534	61959971
chr1	62188218	62188488
chr1	62221660	62222076
chr1	62262401	62262849
chr1	62280678	62280948
chr1	62290823	62291331
chr1	62323107	62323411
chr1	62439763	62439970
chr1	62458036	62458455
chr1	62620399	62620619
chr1	62642122	62642360
chr1	62711721	62711958
chr1	62745092	62745263
chr1	62747719	62747899
chr1	62753671	62753936
chr1	62788708	62788970
chr1	62789806	62790349
chr1	62796318	62796547
chr1	62797779	62798302
chr1	62799993	62800186
chr1	62830211	62830441
chr1	62830567	62830969
chr1	62842928	62843149
chr1	62906929	62907174
chr1	62907454	62907760
chr1	62948538	62948732
chr1	62980546	62981085
chr1	62997918	62998401
chr1	63002058	63002236
chr1	63228873	63229097
chr1	63237441	63237755
chr1	63564449	63564726
chr1	63674793	63675145
chr1	63752343	63752726
chr1	63810399	63810949
chr1	63875128	63875308
chr1	63904512	63904768
chr1	63946848	63947077
chr1	63949062	63949243
chr1	63975845	63976271
chr1	63981480	63981814
chr1	64046175	64046348
chr1	64067192	64067722
chr1	64081618	64082471
chr1	64087781	64087950
chr1	64113559	64113745
chr1	64167761	64168048
chr1	64168669	64169024
chr1	64189223	64190021
chr1	64220312	64220694
chr1	64235944	64236432
chr1	64236619	64237185
chr1	64242493	64243223
chr1	64245373	64245859
chr1	64247117	64247619
chr1	64267145	64267462
chr1	64270414	64270615
chr1	64324617	64324901
chr1	64342235	64342608
chr1	64349431	64349621
chr1	64352016	64352563
chr1	64354625	64354859
chr1	64413562	64413847
chr1	64494729	64494914
chr1	64584388	64584568
chr1	64678145	64678351
chr1	64701725	64702271
chr1	64764159	64764449
chr1	64803876	64804158
chr1	64838002	64838249
chr1	64838407	64838775
chr1	64841747	64842494
chr1	64851829	64852201
chr1	64854377	64854658
chr1	64885893	64886286
chr1	64890890	64891229
chr1	64898823	64899064
chr1	64906844	64907163
chr1	64963528	64963717
chr1	65293391	65293719
chr1	65454128	65454308
chr1	66224435	66224766
chr1	66233736	66233959
chr1	66241863	66242290
chr1	66258015	66258364
chr1	66270014	66270232
chr1	66273024	66273931
chr1	66274764	66275232
chr1	66367314	66367933
chr1	66406544	66406715
chr1	66409993	66410312
chr1	66416877	66417058
chr1	66433378	66433723
chr1	66435096	66435465
chr1	66616323	66616668
chr1	66663739	66664258
chr1	66684760	66685256
chr1	66696687	66696951
chr1	66701746	66702035
chr1	66735941	66736259
chr1	66738864	66739790
chr1	66824471	66824847
chr1	66843414	66843518
chr1	66863490	66863768
chr1	66908502	66908638
chr1	66909243	66909553
chr1	66918089	66918553
chr1	67050243	67050532
chr1	67096261	67096441
chr1	67150068	67150338
chr1	67274492	67274965
chr1	67444239	67444737
chr1	67483575	67483790
chr1	67849102	67849333
chr1	67849879	67850142
chr1	68093098	68093285
chr1	68225260	68225500
chr1	68394672	68394958
chr1	68620834	68621041
chr1	68820033	68820273
chr1	68919568	68920212
chr1	69020165	69020687
chr1	69203877	69204334
chr1	69205092	69205328
chr1	69349018	69349310
chr1	69499572	69499831
chr1	69505253	69505771
chr1	69520208	69520508
chr1	69554653	69554961
chr1	69637899	69638114
chr1	69650831	69651064
chr1	69836875	69837238
chr1	69875656	69876012
chr1	69900074	69900408
chr1	70212282	70212788
chr1	70222499	70222698
chr1	70418389	70418626
chr1	70426458	70427081
chr1	70521971	70522281
chr1	70576443	70576636
chr1	70912813	70913038
chr1	70927124	70927304
chr1	71044067	71044481
chr1	71313240	71313519
chr1	71323596	71323830
chr1	71504578	71504846
chr1	71587026	71587447
chr1	71730379	71730720
chr1	71991772	71991985
chr1	72017529	72017776
chr1	72018571	72018845
chr1	72061104	72061686
chr1	72078290	72078617
chr1	72115496	72116004
chr1	72234000	72234373
chr1	72261221	72261545
chr1	72272330	72272510
chr1	72273014	72273660
chr1	72290810	72290992
chr1	72301725	72301947
chr1	72302364	72302661
chr1	72303175	72303376
chr1	72404838	72405040
chr1	72426276	72426682
chr1	72429613	72429962
chr1	72536832	72537043
chr1	72629743	72630029
chr1	72639900	72640351
chr1	72646106	72646476
chr1	72766751	72767363
chr1	72784530	72784794
chr1	72785407	72785904
chr1	72786089	72786772
chr1	72792964	72793462
chr1	72797786	72798346
chr1	72850583	72851088
chr1	72856792	72856972
chr1	72861805	72862135
chr1	72873078	72873275
chr1	72874276	72874790
chr1	72876514	72877101
chr1	72879262	72880031
chr1	72900777	72901217
chr1	72905490	72905712
chr1	72912568	72912748
chr1	72916100	72916342
chr1	72917707	72917968
chr1	72921349	72921729
chr1	72934501	72934750
chr1	73017283	73017584
chr1	73136449	73136629
chr1	73187196	73187493
chr1	73200046	73200305
chr1	73215993	73216317
chr1	73288868	73289169
chr1	73290597	73290769
chr1	73317471	73317811
chr1	73408707	73408914
chr1	73464748	73465099
chr1	73554025	73554382
chr1	73687265	73688033
chr1	73689283	73689667
chr1	73690218	73690495
chr1	73768280	73768890
chr1	73790583	73791119
chr1	73827930	73828186
chr1	73834391	73834571
chr1	73853860	73854045
chr1	73867097	73867680
chr1	73870886	73871667
chr1	73875683	73876034
chr1	73896941	73897672
chr1	73909301	73909600
chr1	73910992	73911274
chr1	73949339	73949530
chr1	73953016	73953196
chr1	73988822	73989185
chr1	73990249	73990489
chr1	73990945	73991434
chr1	74001363	74001698
chr1	74001930	74002199
chr1	74009687	74009957
chr1	74010151	74010586
chr1	74025806	74026258
chr1	74042887	74043114
chr1	74044988	74045607
chr1	74051667	74051902
chr1	74063338	74063498
chr1	74074035	74074808
chr1	74075495	74075769
chr1	74077369	74077883
chr1	74089403	74089635
chr1	74141100	74141539
chr1	74143968	74144231
chr1	74144972	74145370
chr1	74150694	74150899
chr1	74152324	74152525
chr1	74157846	74158477
chr1	74165633	74166079
chr1	74168479	74168727
chr1	74171834	74172121
chr1	74213857	74214061
chr1	74214759	74214954
chr1	74335950	74336130
chr1	74336760	74337043
chr1	74342203	74342767
chr1	74345723	74345922
chr1	74378853	74379506
chr1	74386922	74387351
chr1	74401499	74401679
chr1	74443852	74444214
chr1	74465637	74466130
chr1	74585153	74585713
chr1	74588951	74589591
chr1	74590770	74591053
chr1	74631497	74632007
chr1	74766397	74766579
chr1	74822190	74822537
chr1	74844040	74844397
chr1	74871472	74871714
chr1	74893014	74893273
chr1	75032491	75032671
chr1	75176096	75176537
chr1	75231156	75231450
chr1	75244718	75245045
chr1	75247126	75247306
chr1	75314097	75314273
chr1	75353932	75354204
chr1	75362128	75362586
chr1	75366974	75367252
chr1	75395352	75395578
chr1	75396504	75397168
chr1	75455976	75456259
chr1	75502916	75503096
chr1	75516303	75516485
chr1	75569433	75569636
chr1	75584756	75585044
chr1	75585488	75585732
chr1	75613688	75613891
chr1	75614212	75614506
chr1	75650366	75650696
chr1	75783186	75783440
chr1	75795331	75795608
chr1	76035633	76036079
chr1	76279938	76280265
chr1	76532315	76532498
chr1	76637846	76638162
chr1	76639285	76639566
chr1	76818917	76819089
chr1	76863083	76863476
chr1	76939105	76939770
chr1	77040350	77040687
chr1	77059066	77059263
chr1	77071555	77072177
chr1	77125066	77125372
chr1	77223072	77223652
chr1	77279798	77279978
chr1	77367543	77367877
chr1	77374004	77374479
chr1	77399294	77399557
chr1	77406673	77407288
chr1	77423569	77423823
chr1	77446848	77447061
chr1	77490546	77490771
chr1	77493402	77493864
chr1	77511451	77511848
chr1	77530222	77530416
chr1	77728779	77728980
chr1	77745446	77745757
chr1	77968954	77969253
chr1	78212437	78212624
chr1	78351808	78352149
chr1	78363840	78364015
chr1	78367747	78368574
chr1	78432502	78432682
chr1	78485372	78485868
chr1	78534187	78534522
chr1	78545638	78545896
chr1	78564783	78565124
chr1	78590467	78590722
chr1	78660959	78661164
chr1	78722512	78722693
chr1	78737240	78737621
chr1	78741862	78742457
chr1	78757515	78758217
chr1	78778595	78778789
chr1	78786372	78786695
chr1	78816187	78816561
chr1	78848978	78849254
chr1	78860506	78860769
chr1	79448925	79449344
chr1	79587109	79587301
chr1	79589331	79589590
chr1	79595467	79595686
chr1	79693969	79694309
chr1	79707368	79707556
chr1	79783795	79784086
chr1	79786007	79786187
chr1	79799761	79799941
chr1	79803463	79803976
chr1	79819712	79820205
chr1	79821430	79821623
chr1	79829238	79829798
chr1	79842695	79842931
chr1	79857209	79857576
chr1	79857713	79858315
chr1	79881679	79882002
chr1	79914337	79914664
chr1	79942155	79942355
chr1	79943208	79943468
chr1	79952669	79953059
chr1	80015084	80015739
chr1	80018559	80018755
chr1	80020112	80020478
chr1	80087903	80088264
chr1	80221431	80221884
chr1	80233971	80234373
chr1	80235253	80235710
chr1	80380815	80381065
chr1	80405189	80405487
chr1	80483069	80483277
chr1	80600891	80601266
chr1	80633713	80634288
chr1	80648505	80649284
chr1	80652928	80653253
chr1	80705615	80706252
chr1	80716039	80716503
chr1	80752572	80752920
chr1	80753622	80753936
chr1	80820583	80820782
chr1	80850844	80851407
chr1	80944616	80944894
chr1	80947072	80947271
chr1	81263140	81263380
chr1	81277627	81277964
chr1	81519566	81519842
chr1	81741123	81741500
chr1	81768394	81768598
chr1	81847356	81847554
chr1	81883550	81883976
chr1	82121154	82121390
chr1	82147133	82147774
chr1	82186029	82186548
chr1	82188105	82188377
chr1	82239944	82240262
chr1	82254104	82254416
chr1	82279666	82279867
chr1	82280058	82280327
chr1	82287483	82287687
chr1	82380738	82381057
chr1	82381693	82382000
chr1	82382297	82382784
chr1	82425753	82426087
chr1	82471034	82471237
chr1	82473198	82473804
chr1	82476806	82477020
chr1	82552326	82552637
chr1	82593848	82594092
chr1	82605403	82605734
chr1	82631047	82631540
chr1	82784038	82784361
chr1	82828169	82828756
chr1	82841276	82841450
chr1	83063614	83063913
chr1	83098542	83098770
chr1	83773810	83773991
chr1	83903229	83904269
chr1	84128361	84128740
chr1	84151716	84152510
chr1	84173645	84173911
chr1	84250086	84250740
chr1	84321967	84322207
chr1	84383352	84383677
chr1	84384205	84384462
chr1	84440187	84440655
chr1	84461390	84461670
chr1	84481696	84481988
chr1	84575946	84576126
chr1	84581840	84582296
chr1	84617848	84618197
chr1	84691387	84691575
chr1	84720384	84720585
chr1	84932279	84932649
chr1	87592243	87592526
chr1	87616836	87617209
chr1	87675774	87676076
chr1	87748500	87748822
chr1	87798447	87799190
chr1	87813417	87813935
chr1	87818209	87819517
chr1	87824803	87825288
chr1	87830179	87830593
chr1	87866023	87866442
chr1	87871077	87871296
chr1	87878580	87878904
chr1	87904366	87904653
chr1	87928728	87929521
chr1	87935206	87935478
chr1	87949724	87950557
chr1	87951546	87951768
chr1	88095730	88095910
chr1	88171969	88172407
chr1	88203990	88204305
chr1	88268639	88268906
chr1	88275923	88276283
chr1	88330666	88331707
chr1	88332009	88332387
chr1	88337139	88337411
chr1	88344470	88344650
chr1	88387331	88387529
chr1	88397820	88398037
chr1	88401009	88401229
chr1	88402080	88402415
chr1	88406035	88406337
chr1	88407482	88407998
chr1	88422985	88423214
chr1	88427408	88427771
chr1	88552578	88552865
chr1	88553718	88554038
chr1	88602124	88602340
chr1	88639370	88639824
chr1	88770297	88770667
chr1	88907219	88907552
chr1	88909355	88909584
chr1	88910272	88910728
chr1	88918697	88918905
chr1	88920018	88920305
chr1	88925390	88926032
chr1	89072371	89072741
chr1	89083403	89083659
chr1	89166811	89167117
chr1	89169964	89170644
chr1	89188156	89188377
chr1	89210471	89210800
chr1	89213193	89213618
chr1	89223229	89223409
chr1	89293804	89294080
chr1	89354541	89354924
chr1	89504328	89504788
chr1	89518648	89518969
chr1	89682786	89683480
chr1	89726628	89726824
chr1	89743480	89743844
chr1	89743936	89744116
chr1	89768109	89768453
chr1	89776130	89777034
chr1	89788212	89788571
chr1	89789097	89789393
chr1	89826202	89826776
chr1	90158935	90159253
chr1	90173506	90174186
chr1	90181602	90181796
chr1	90321199	90321452
chr1	90374630	90375266
chr1	90403989	90404176
chr1	90435865	90436214
chr1	90436434	90436805
chr1	90519781	90519973
chr1	90520102	90520482
chr1	90554701	90555410
chr1	90557152	90557516
chr1	90574098	90574424
chr1	90596889	90597067
chr1	90604121	90604684
chr1	90604837	90605016
chr1	90605310	90605490
chr1	90691640	90691908
chr1	90706164	90706615
chr1	90723985	90724237
chr1	90736520	90737130
chr1	90820669	90821298
chr1	90824821	90825001
chr1	90833979	90834220
chr1	90860695	90860894
chr1	90937927	90938128
chr1	90952820	90953000
chr1	90983302	90983529
chr1	90990998	90991329
chr1	91000939	91001349
chr1	91005012	91005536
chr1	91016928	91017102
chr1	91017968	91018324
chr1	91032560	91033264
chr1	91033531	91034285
chr1	91034940	91035287
chr1	91124909	91125413
chr1	91131952	91132386
chr1	91165532	91165737
chr1	91205398	91205646
chr1	91240086	91240244
chr1	91265475	91265655
chr1	91296939	91297878
chr1	91309652	91310185
chr1	91316956	91317769
chr1	91318012	91318384
chr1	91321087	91321597
chr1	91326877	91327154
chr1	91351210	91351502
chr1	91353163	91353535
chr1	91364097	91364357
chr1	91386107	91386468
chr1	91406452	91407111
chr1	91414202	91414757
chr1	91418528	91418811
chr1	91454812	91455003
chr1	91463170	91463465
chr1	91472054	91472386
chr1	91473662	91473958
chr1	91518558	91519139
chr1	91540583	91541065
chr1	91553247	91553879
chr1	91573193	91573367
chr1	91604834	91605366
chr1	91625220	91625452
chr1	91695489	91695710
chr1	91756935	91757339
chr1	91773107	91773430
chr1	91777487	91777686
chr1	91783963	91784153
chr1	91788963	91789143
chr1	91809032	91809265
chr1	91831178	91831584
chr1	91923663	91923820
chr1	92124802	92125288
chr1	92129043	92129569
chr1	92175628	92176109
chr1	92182013	92182198
chr1	92185487	92185678
chr1	92187364	92187931
chr1	92233785	92234075
chr1	92238979	92239281
chr1	92371540	92371928
chr1	92457575	92457938
chr1	92495958	92496149
chr1	92547343	92547735
chr1	92578552	92578732
chr1	92630739	92630919
chr1	92645270	92645450
chr1	92672059	92672398
chr1	92811821	92812194
chr1	92822564	92823022
chr1	92825153	92825384
chr1	92861453	92861840
chr1	92864037	92864635
chr1	92869513	92870373
chr1	92871511	92872049
chr1	92872659	92872865
chr1	92907502	92907711
chr1	92913674	92913974
chr1	92935132	92935693
chr1	92939784	92940019
chr1	92949517	92949870
chr1	92952218	92952566
chr1	92958834	92959336
chr1	92961529	92962249
chr1	93073421	93073816
chr1	93075605	93075806
chr1	93077972	93078349
chr1	93078555	93079023
chr1	93103046	93103202
chr1	93103434	93104115
chr1	93104419	93104700
chr1	93105597	93106939
chr1	93108001	93108752
chr1	93112646	93112831
chr1	93171078	93171383
chr1	93196691	93196980
chr1	93310591	93311340
chr1	93332392	93332568
chr1	93332952	93333519
chr1	93352220	93352446
chr1	93352799	93352970
chr1	93354732	93355328
chr1	93361132	93361404
chr1	93422378	93422863
chr1	93454303	93454505
chr1	93457824	93458106
chr1	93459724	93460259
chr1	93497194	93497764
chr1	93629041	93629448
chr1	93747598	93748289
chr1	93779715	93780032
chr1	93799843	93800494
chr1	93828448	93828645
chr1	93863723	93864001
chr1	93875020	93875418
chr1	93918567	93918821
chr1	93927172	93927434
chr1	93935350	93935635
chr1	93937863	93938136
chr1	93953652	93954097
chr1	93971999	93972220
chr1	93988925	93989234
chr1	93995046	93995414
chr1	93996017	93997623
chr1	94021522	94021702
chr1	94027068	94027435
chr1	94033658	94034295
chr1	94091982	94092769
chr1	94108637	94109338
chr1	94112504	94113023
chr1	94154618	94155049
chr1	94160786	94161156
chr1	94240348	94240716
chr1	94333479	94334028
chr1	94342487	94342670
chr1	94531684	94531865
chr1	94617242	94617433
chr1	94639532	94639755
chr1	94641348	94641781
chr1	94642541	94642725
chr1	94651474	94651952
chr1	94666248	94666635
chr1	94683777	94684197
chr1	94729268	94729575
chr1	94730638	94730802
chr1	94734408	94734973
chr1	94775967	94776201
chr1	94803306	94803573
chr1	94830756	94831079
chr1	94832083	94832478
chr1	94869433	94869896
chr1	94965240	94965420
chr1	94980001	94980271
chr1	94981750	94982133
chr1	95080800	95081059
chr1	95103968	95104567
chr1	95106659	95107294
chr1	95113305	95114121
chr1	95117147	95117729
chr1	95123820	95124342
chr1	95163792	95164051
chr1	95581898	95582241
chr1	95591485	95591980
chr1	95931840	95932129
chr1	96036148	96036367
chr1	96275541	96275726
chr1	96309631	96309983
chr1	96400303	96400934
chr1	96866886	96867089
chr1	97115460	97115878
chr1	97138366	97138644
chr1	97164586	97165111
chr1	97250767	97251045
chr1	97478901	97479082
chr1	97943269	97943496
chr1	99437270	99437661
chr1	99450230	99450893
chr1	99451678	99451911
chr1	99452128	99452412
chr1	99461271	99461604
chr1	99516465	99516681
chr1	99557179	99557468
chr1	99730346	99730727
chr1	99739846	99740530
chr1	99759919	99760090
chr1	99895610	99895846
chr1	99899409	99899705
chr1	99967689	99967880
chr1	99968896	99969192
chr1	99991365	99991556
chr1	100086867	100087077
chr1	103802208	103802388
chr1	104067231	104067902
chr1	104301320	104301535
chr1	106549096	106549298
chr1	106643280	106643836
chr1	106651069	106651422
chr1	106664719	106665260
chr1	106665767	106666185
chr1	106666795	106667244
chr1	106668486	106668925
chr1	106692864	106693074
chr1	106703852	106704207
chr1	106724685	106725099
chr1	106734786	106735304
chr1	106735467	106735702
chr1	106745249	106745888
chr1	106858932	106859142
chr1	106970897	106971213
chr1	107007815	107008063
chr1	107075960	107076272
chr1	107095885	107096173
chr1	107208960	107209210
chr1	107281085	107281477
chr1	107802599	107803409
chr1	107843798	107844067
chr1	107879590	107879869
chr1	107886925	107887151
chr1	107889826	107890143
chr1	107893957	107894159
chr1	107910454	107910617
chr1	107939538	107940302
chr1	108049619	108049857
chr1	108051430	108052299
chr1	108067828	108068093
chr1	108068236	108068413
chr1	108096208	108096639
chr1	108098543	108098992
chr1	108127029	108127209
chr1	108128422	108128757
chr1	108129104	108129447
chr1	108136852	108137032
chr1	108137624	108138131
chr1	108138758	108139070
chr1	108140005	108140337
chr1	108213489	108213870
chr1	108277184	108277374
chr1	108299570	108300138
chr1	108303459	108303889
chr1	108324751	108325227
chr1	108379667	108379916
chr1	108423478	108423687
chr1	108456710	108456923
chr1	108467112	108467330
chr1	108493758	108493983
chr1	108499286	108499820
chr1	108526444	108526714
chr1	108549979	108550316
chr1	108599330	108599673
chr1	108718979	108719267
chr1	108766539	108767034
chr1	108892472	108892710
chr1	109486512	109486957
chr1	109489289	109489459
chr1	109804972	109805236
chr1	109847029	109847345
chr1	109872154	109872850
chr1	109998608	109999438
chr1	110120673	110120971
chr1	110349358	110349704
chr1	111368285	111368588
chr1	111378064	111378303
chr1	113761207	113761554
chr1	113770294	113770507
chr1	114286395	114286682
chr1	115194448	115194797
chr1	115254455	115255365
chr1	115309557	115309826
chr1	115313404	115313859
chr1	115319483	115319725
chr1	115327896	115328254
chr1	115455443	115455785
chr1	115529832	115530227
chr1	115559900	115560080
chr1	115720114	115720419
chr1	115935953	115936349
chr1	116147468	116147703
chr1	116227120	116227465
chr1	116570571	116570796
chr1	118145216	118145398
chr1	118180686	118180948
chr1	118203243	118203420
chr1	120191492	120191820
chr1	120334567	120334749
chr1	120353689	120354152
chr1	120377828	120378177
chr1	120464420	120464600
chr1	120495071	120495252
chr1	120546480	120547042
chr1	120591032	120591440
chr1	120800380	120800685
chr1	120813145	120813392
chr1	120851566	120851817
chr1	120872992	120873712
chr1	120877137	120877645
chr1	120878981	120879502
chr1	120913521	120913765
chr1	120916742	120916934
chr1	120929993	120930911
chr1	120946512	120947148
chr1	120984184	120984428
chr1	120994464	120995280
chr1	121091244	121091515
chr1	121099013	121099298
chr1	121106184	121106560
chr1	121131117	121131301
chr1	121151947	121152681
chr1	121153306	121153919
chr1	121155817	121156340
chr1	121205606	121205796
chr1	121225377	121226022
chr1	121240697	121240975
chr1	121280621	121280849
chr1	121285184	121285906
chr1	121286391	121287038
chr1	121287823	121288233
chr1	121333971	121334467
chr1	121350278	121350753
chr1	121388708	121389053
chr1	121390694	121390966
chr1	121391971	121392319
chr1	121405193	121405420
chr1	121414688	121415039
chr1	121421580	121421855
chr1	121429974	121430355
chr1	121486632	121486950
chr1	121545459	121545654
chr1	121726695	121726923
chr1	121775380	121776075
chr1	121791487	121792023
chr1	121924347	121924626
chr1	121929591	121929962
chr1	121932114	121932465
chr1	121933577	121933927
chr1	121952873	121953156
chr1	121969454	121969815
chr1	121990148	121990397
chr1	122002089	122002341
chr1	122011996	122013136
chr1	122016547	122017092
chr1	122021441	122021708
chr1	122039128	122039520
chr1	122104064	122104552
chr1	122117950	122118234
chr1	122142249	122142759
chr1	122228527	122228737
chr1	122253966	122254335
chr1	122363410	122363669
chr1	122455209	122455495
chr1	122632794	122633335
chr1	122650994	122651186
chr1	122748504	122748947
chr1	122818095	122818525
chr1	122871310	122871594
chr1	122981879	122982265
chr1	122983657	122984141
chr1	123008534	123008782
chr1	123009348	123009581
chr1	123073792	123073982
chr1	123211309	123211909
chr1	123226002	123226323
chr1	123347688	123348071
chr1	127332359	127332584
chr1	127422577	127423154
chr1	127438901	127439335
chr1	127456800	127457325
chr1	127535979	127536713
chr1	127540356	127540537
chr1	127556793	127557036
chr1	127559732	127559983
chr1	127561980	127562184
chr1	127584720	127585031
chr1	127656543	127656867
chr1	127751309	127751704
chr1	127781860	127782040
chr1	127808050	127808412
chr1	127904304	127904507
chr1	127920834	127921566
chr1	127927395	127927675
chr1	128074790	128075031
chr1	128129969	128130228
chr1	128238368	128238778
chr1	128328399	128328567
chr1	128366622	128367115
chr1	128381135	128381714
chr1	128470330	128470550
chr1	128493988	128494296
chr1	128552813	128553268
chr1	128578592	128578781
chr1	128580209	128581279
chr1	128582566	128582878
chr1	128583304	128583572
chr1	128725654	128726167
chr1	128726577	128727573
chr1	128762067	128762666
chr1	128818880	128819287
chr1	128820691	128820871
chr1	128821700	128822564
chr1	128824841	128825094
chr1	128889057	128889408
chr1	129003996	129004492
chr1	129136572	129136892
chr1	129235621	129236179
chr1	129245076	129245621
chr1	129265070	129265650
chr1	129277375	129277518
chr1	129304217	129304504
chr1	129305551	129305745
chr1	129311085	129311515
chr1	129319226	129319422
chr1	129842355	129842541
chr1	129977882	129978242
chr1	129979430	129979709
chr1	130109874	130110043
chr1	130181690	130181996
chr1	130301421	130302051
chr1	130368535	130369228
chr1	130457749	130458538
chr1	130475001	130475386
chr1	130482459	130482908
chr1	130492100	130492478
chr1	130546213	130546422
chr1	130549422	130549836
chr1	130556462	130556880
chr1	130557133	130557336
chr1	130678407	130678729
chr1	130686254	130686862
chr1	130753666	130753846
chr1	132540786	132541034
chr1	132596505	132596839
chr1	132631058	132631249
chr1	132637306	132637664
chr1	132726605	132726831
chr1	132768631	132768822
chr1	132891969	132892406
chr1	132926875	132927204
chr1	132927702	132927878
chr1	132949833	132950057
chr1	132959290	132959887
chr1	132975281	132975777
chr1	133013155	133013379
chr1	133030738	133031180
chr1	133031683	133032180
chr1	133049628	133049894
chr1	133143421	133143736
chr1	133191775	133192058
chr1	133232200	133232460
chr1	133241925	133242350
chr1	133242595	133242957
chr1	133248171	133248505
chr1	133250695	133251269
chr1	133253747	133254018
chr1	133275134	133275835
chr1	133276812	133277272
chr1	133281074	133281313
chr1	133313727	133314224
chr1	133314691	133314927
chr1	133328349	133328836
chr1	133334469	133335032
chr1	133337221	133337505
chr1	133357754	133358130
chr1	133368196	133368373
chr1	133370047	133370831
chr1	133378809	133379321
chr1	133379741	133380416
chr1	133385879	133386270
chr1	133391200	133391410
chr1	133410869	133411181
chr1	133418282	133418549
chr1	133423288	133423483
chr1	133424839	133425123
chr1	133425339	133425581
chr1	133562389	133562829
chr1	133592897	133593288
chr1	133633782	133634235
chr1	133647764	133648015
chr1	133648542	133648965
chr1	133662157	133662366
chr1	133667219	133667634
chr1	133806692	133806942
chr1	133961602	133961991
chr1	134008007	134008250
chr1	134042776	134043046
chr1	134046750	134047006
chr1	134061402	134061629
chr1	134104822	134105069
chr1	134118699	134119124
chr1	134208617	134208855
chr1	134213953	134214280
chr1	134215756	134216240
chr1	134223335	134223725
chr1	134230290	134230704
chr1	134252527	134252712
chr1	134267266	134267660
chr1	134267886	134268066
chr1	134270700	134271080
chr1	134272036	134272312
chr1	134327354	134327659
chr1	134328315	134328662
chr1	134329953	134330309
chr1	134365454	134365967
chr1	134373579	134373770
chr1	134419693	134420009
chr1	134427440	134427687
chr1	134454420	134455085
chr1	134457553	134457835
chr1	134522702	134522984
chr1	134536828	134537200
chr1	134624247	134624489
chr1	134662513	134663174
chr1	134683362	134683915
chr1	134700479	134700659
chr1	134707362	134707542
chr1	134740628	134741097
chr1	134748528	134748776
chr1	134749969	134750237
chr1	134778001	134778390
chr1	134828976	134829430
chr1	134874051	134874363
chr1	134949577	134949802
chr1	134965394	134965927
chr1	134968324	134968790
chr1	135055676	135055986
chr1	135067766	135067946
chr1	135075277	135075784
chr1	135084530	135084907
chr1	135164654	135164811
chr1	135193132	135193404
chr1	135199163	135199399
chr1	135261542	135261920
chr1	135294440	135294635
chr1	135331103	135331419
chr1	135342938	135343132
chr1	135493293	135493575
chr1	135555095	135555718
chr1	135557906	135558134
chr1	135592583	135592871
chr1	135609621	135609908
chr1	135697574	135697802
chr1	135751700	135752044
chr1	135760247	135760569
chr1	135788181	135788409
chr1	135789648	135790055
chr1	135791166	135791364
chr1	135804625	135804916
chr1	135805808	135806140
chr1	135812510	135813151
chr1	135817995	135818421
chr1	135831048	135831289
chr1	135858419	135858755
chr1	135870581	135870729
chr1	135885554	135885839
chr1	135925152	135925344
chr1	135934964	135935260
chr1	135957650	135958189
chr1	135959046	135960408
chr1	135960982	135961206
chr1	135963885	135964108
chr1	135967919	135968149
chr1	135974038	135974550
chr1	135974751	135975092
chr1	135976333	135976750
chr1	135980791	135980997
chr1	135992786	135993561
chr1	136000430	136000901
chr1	136101882	136102210
chr1	136106822	136107043
chr1	136116113	136116596
chr1	136118759	136119010
chr1	136126543	136126738
chr1	136128901	136129223
chr1	136129439	136130211
chr1	136141625	136142076
chr1	136162315	136162729
chr1	136188827	136189010
chr1	136229299	136229668
chr1	136412397	136412796
chr1	136413079	136413439
chr1	136415339	136415613
chr1	136444896	136445197
chr1	136548055	136548295
chr1	136548499	136548720
chr1	136619565	136619820
chr1	136623970	136624173
chr1	136687352	136687541
chr1	136713201	136713585
chr1	136755293	136755640
chr1	136908669	136908849
chr1	136917575	136917920
chr1	137022528	137023297
chr1	137032639	137032819
chr1	137044062	137044485
chr1	137045591	137045956
chr1	137051016	137051572
chr1	137052907	137053515
chr1	137054882	137056192
chr1	137057111	137057386
chr1	137059322	137059643
chr1	137064116	137064297
chr1	137066283	137066855
chr1	137078841	137079108
chr1	137084863	137085190
chr1	137092256	137092872
chr1	137159967	137160183
chr1	137177303	137177604
chr1	137178136	137178355
chr1	137207960	137208146
chr1	137248688	137248868
chr1	137254900	137255123
chr1	137264868	137265048
chr1	137265693	137266006
chr1	137271583	137272330
chr1	137307609	137307888
chr1	137400051	137400408
chr1	137409689	137410500
chr1	137411485	137412271
chr1	137414223	137414403
chr1	137415116	137415637
chr1	137432961	137433146
chr1	137435478	137435828
chr1	137441373	137441591
chr1	137445228	137445808
chr1	137454519	137455212
chr1	137460248	137460623
chr1	137461714	137462162
chr1	137462290	137462800
chr1	137464641	137465199
chr1	137474415	137474653
chr1	137477586	137477988
chr1	137480287	137480676
chr1	137515680	137516121
chr1	137528193	137528443
chr1	137540662	137541233
chr1	137556037	137556410
chr1	137566148	137566913
chr1	137577829	137578116
chr1	137583271	137584099
chr1	137584795	137585046
chr1	137590830	137591173
chr1	137630834	137631600
chr1	137635996	137636506
chr1	137637604	137638010
chr1	137667774	137668082
chr1	137697197	137697475
chr1	137698612	137698903
chr1	137718293	137718710
chr1	137747323	137747630
chr1	137749077	137749464
chr1	137826416	137826696
chr1	137914393	137914577
chr1	137952464	137952720
chr1	138015426	138015775
chr1	138016508	138016850
chr1	138026804	138027034
chr1	138034123	138034419
chr1	138039001	138039383
chr1	138040148	138040396
chr1	138091141	138091378
chr1	138124525	138124801
chr1	138165015	138165194
chr1	138222462	138222786
chr1	138228385	138228922
chr1	138247462	138247683
chr1	138257945	138258278
chr1	138259153	138259395
chr1	138277733	138278466
chr1	138311632	138311838
chr1	138352364	138353233
chr1	138359078	138359463
chr1	138409792	138410155
chr1	138595366	138595650
chr1	138665589	138665769
chr1	138830654	138830982
chr1	139228434	139228753
chr1	139350532	139350750
chr1	139485250	139485430
chr1	139485596	139485841
chr1	139487843	139488209
chr1	139488641	139488823
chr1	139514065	139514387
chr1	139515838	139516187
chr1	139540200	139540383
chr1	139550202	139550440
chr1	139553395	139553888
chr1	139567317	139567555
chr1	139683248	139683498
chr1	139796716	139797169
chr1	139797515	139797795
chr1	139799873	139800241
chr1	139824275	139824859
chr1	139825093	139825562
chr1	139826411	139826755
chr1	139862686	139863039
chr1	140045476	140045832
chr1	140142139	140142404
chr1	140222646	140223501
chr1	140403729	140403913
chr1	140414869	140415048
chr1	140464593	140465365
chr1	140473377	140473721
chr1	140492748	140493093
chr1	140541643	140542010
chr1	140583346	140583693
chr1	140825415	140825709
chr1	140888972	140889518
chr1	140946555	140947008
chr1	140975570	140975906
chr1	140977087	140977466
chr1	141077215	141077409
chr1	141106415	141106728
chr1	141129150	141129599
chr1	141179754	141179937
chr1	141212589	141212824
chr1	141233592	141234242
chr1	141243076	141243882
chr1	141245209	141245498
chr1	141319698	141319907
chr1	141321633	141322007
chr1	141335051	141335346
chr1	142994248	142994439
chr1	143000476	143000973
chr1	143072590	143073065
chr1	143423263	143423664
chr1	144882048	144882552
chr1	144976743	144977459
chr1	144994974	144995203
chr1	145041576	145042010
chr1	145042287	145042467
chr1	145096790	145097229
chr1	145155227	145155444
chr1	145324129	145324309
chr1	145456998	145457224
chr1	145554208	145554442
chr1	145587202	145587445
chr1	145636039	145636274
chr1	145667717	145667897
chr1	145684360	145684776
chr1	145751064	145751451
chr1	145788592	145788961
chr1	145794124	145794462
chr1	145865741	145865983
chr1	145960753	145960961
chr1	145966645	145966908
chr1	146146779	146147007
chr1	146190563	146190743
chr1	148639745	148640360
chr1	148691091	148691625
chr1	149106067	149106247
chr1	151562341	151562652
chr1	151709999	151710169
chr1	151800323	151800607
chr1	152181577	152181791
chr1	152336369	152336580
chr1	152383302	152383560
chr1	152392550	152392730
chr1	152393179	152393491
chr1	152527562	152527737
chr1	152528211	152528525
chr1	152587902	152588331
chr1	152606393	152607146
chr1	152608008	152608378
chr1	152622929	152623395
chr1	152654042	152654343
chr1	152704971	152705150
chr1	152720379	152720734
chr1	152725638	152725887
chr1	152734878	152735059
chr1	152737247	152737581
chr1	152762219	152762413
chr1	152789306	152789564
chr1	152790797	152791136
chr1	152797361	152797628
chr1	152806893	152807078
chr1	152823379	152823930
chr1	152826865	152827202
chr1	152840637	152840905
chr1	152854924	152855257
chr1	152866603	152866984
chr1	152909532	152909867
chr1	152926169	152926378
chr1	153083763	153084143
chr1	153098079	153098292
chr1	153190148	153190448
chr1	153275502	153275675
chr1	153341863	153342205
chr1	153473793	153474157
chr1	153479060	153479558
chr1	153500716	153501040
chr1	153531903	153532120
chr1	153532733	153533159
chr1	153556499	153557073
chr1	153567151	153567463
chr1	153737457	153737712
chr1	153772910	153773209
chr1	153791985	153792271
chr1	153792430	153792824
chr1	153800700	153801090
chr1	153822207	153822387
chr1	153824040	153824352
chr1	153831230	153831444
chr1	153833612	153833798
chr1	153855665	153855879
chr1	153910889	153911222
chr1	153935848	153936074
chr1	153938038	153938222
chr1	153948940	153949134
chr1	153977512	153977865
chr1	154012072	154013135
chr1	154015407	154015813
chr1	154050419	154050748
chr1	154061544	154061953
chr1	154064589	154064883
chr1	154247718	154248141
chr1	154257599	154258231
chr1	154261516	154262202
chr1	154281314	154281571
chr1	154287034	154287377
chr1	154308923	154309296
chr1	154309519	154309900
chr1	154313500	154313722
chr1	154323473	154323654
chr1	154333365	154333807
chr1	154344131	154344292
chr1	154358486	154358666
chr1	154364316	154364619
chr1	154403160	154404066
chr1	154407611	154408035
chr1	154436401	154436765
chr1	154439802	154440440
chr1	154446591	154446859
chr1	154471023	154471390
chr1	154487455	154488109
chr1	154626164	154626398
chr1	154639883	154640388
chr1	154662428	154662904
chr1	154664464	154664764
chr1	154664944	154665389
chr1	154692428	154692704
chr1	154760923	154761224
chr1	154847699	154847952
chr1	154858884	154859064
chr1	154861474	154862296
chr1	154880196	154880523
chr1	154884734	154885127
chr1	154887143	154887492
chr1	154889557	154889796
chr1	154892563	154892893
chr1	154906772	154907293
chr1	154912767	154913083
chr1	154931187	154931932
chr1	154999754	155000061
chr1	155000653	155001099
chr1	155021940	155022254
chr1	155027772	155028024
chr1	155035309	155035559
chr1	155038786	155039399
chr1	155048556	155048736
chr1	155049300	155049744
chr1	155082898	155083103
chr1	155121940	155122141
chr1	155155231	155156387
chr1	155180383	155180565
chr1	155353209	155353826
chr1	155435111	155435423
chr1	155482374	155483301
chr1	155488687	155489770
chr1	155550534	155551604
chr1	155577770	155578207
chr1	155746695	155746966
chr1	155748434	155748839
chr1	155821354	155821914
chr1	155891942	155892176
chr1	155949859	155950529
chr1	155967701	155968198
chr1	155997247	155997971
chr1	156003782	156004067
chr1	156049855	156050104
chr1	156510913	156511093
chr1	156513176	156513373
chr1	156577750	156578000
chr1	156652969	156653205
chr1	156690535	156690845
chr1	156830069	156830807
chr1	156903309	156903636
chr1	156910031	156910524
chr1	156930310	156930906
chr1	156939528	156939893
chr1	156940663	156940984
chr1	156961069	156961528
chr1	156969645	156970051
chr1	157038854	157039168
chr1	157039873	157040265
chr1	157043921	157044144
chr1	157051585	157052059
chr1	157057018	157057806
chr1	157059644	157060439
chr1	157069476	157069741
chr1	157071349	157071565
chr1	157076931	157077521
chr1	157080828	157081848
chr1	157087130	157087443
chr1	157245275	157245472
chr1	157274614	157274926
chr1	157384463	157384654
chr1	157543059	157543251
chr1	157545484	157545956
chr1	157548032	157548371
chr1	157578270	157578604
chr1	157644636	157645019
chr1	157702608	157703027
chr1	157836486	157836878
chr1	157883374	157884081
chr1	158121004	158121381
chr1	158152857	158153037
chr1	158375269	158375480
chr1	158397793	158397985
chr1	158678640	158679115
chr1	158684675	158685218
chr1	158738537	158738763
chr1	158768844	158769025
chr1	158861272	158861543
chr1	158920249	158920645
chr1	158927317	158928575
chr1	158931251	158931440
chr1	158969261	158970153
chr1	158977869	158978250
chr1	159006451	159006784
chr1	159007109	159007527
chr1	159040654	159041077
chr1	159044608	159045033
chr1	159067325	159067634
chr1	159068189	159068339
chr1	159186714	159187052
chr1	159216836	159217143
[truncated: 31,584 more rows]

## Sheet: SOX2
chr1	3111493	3111733
chr1	3323822	3324090
chr1	4417029	4417225
chr1	4847564	4847882
chr1	4916450	4916630
chr1	4960733	4960967
chr1	5012756	5013777
chr1	5218983	5219303
chr1	5222907	5223240
chr1	6991860	6992040
chr1	7078669	7079011
chr1	7129392	7129572
chr1	7303569	7303897
chr1	7387329	7387511
chr1	7387764	7387944
chr1	7388064	7388276
chr1	9465184	9465390
chr1	9535103	9535298
chr1	9538052	9538288
chr1	9544632	9544861
chr1	9554558	9554876
chr1	9556473	9556768
chr1	9560267	9560650
chr1	9601707	9602040
chr1	9617347	9618040
chr1	9620131	9620747
chr1	9621099	9621457
chr1	9631404	9631643
chr1	9639305	9639705
chr1	9649023	9649368
chr1	10027657	10027848
chr1	11990641	11990984
chr1	12006843	12007091
chr1	12634704	12634925
chr1	13161275	13161521
chr1	13598628	13598808
chr1	13604685	13605122
chr1	13851176	13851440
chr1	13926063	13926530
chr1	13991617	13991906
chr1	13992742	13992970
chr1	14001740	14001920
chr1	14098616	14098809
chr1	14170353	14170708
chr1	14171591	14172132
chr1	14174307	14174726
chr1	14188964	14189393
chr1	14208837	14209249
chr1	14282013	14282764
chr1	14504044	14504285
chr1	14616839	14617076
chr1	14750516	14750744
chr1	16101937	16102109
chr1	16112914	16113185
chr1	16120128	16120429
chr1	16202616	16202880
chr1	16593845	16594058
chr1	16646772	16647055
chr1	17050048	17050283
chr1	17439478	17439724
chr1	17647491	17647774
chr1	17828528	17828813
chr1	19840180	19840369
chr1	19917860	19918196
chr1	19971382	19971564
chr1	20048385	20048659
chr1	20166540	20166849
chr1	20292551	20292766
chr1	20857475	20857928
chr1	20941663	20942152
chr1	20985516	20985727
chr1	21042736	21043057
chr1	21401724	21401934
chr1	21606778	21607011
chr1	21681903	21682098
chr1	21795110	21795508
chr1	21820289	21820543
chr1	22601771	22601987
chr1	22994459	22994639
chr1	23328181	23328360
chr1	23497556	23497736
chr1	23661593	23661820
chr1	23771675	23771881
chr1	23853224	23853532
chr1	24081257	24081534
chr1	24093035	24093268
chr1	24218949	24219160
chr1	24233055	24233348
chr1	24237267	24237790
chr1	24251950	24252159
chr1	24560401	24560595
chr1	24740885	24741185
chr1	25114223	25114408
chr1	25222952	25223140
chr1	25476285	25476563
chr1	25561256	25561475
chr1	25881524	25881750
chr1	25886837	25887069
chr1	25949238	25949560
chr1	25949858	25950133
chr1	31006725	31006945
chr1	31159782	31160306
chr1	31290522	31290751
chr1	33058258	33058458
chr1	33099303	33099626
chr1	33163290	33163493
chr1	33271774	33271961
chr1	33704074	33704266
chr1	33726528	33726708
chr1	33989728	33989979
chr1	34062606	34063015
chr1	34178583	34178821
chr1	34203717	34203960
chr1	34207573	34207962
chr1	34212185	34212359
chr1	34222881	34223070
chr1	34224081	34224447
chr1	34239788	34240025
chr1	34293185	34293384
chr1	34640608	34641066
chr1	34721030	34721339
chr1	34721559	34723644
chr1	34734798	34735006
chr1	34737322	34737502
chr1	34753537	34753731
chr1	34990970	34991189
chr1	35172522	35172920
chr1	35662130	35662338
chr1	35868205	35868647
chr1	35926569	35926754
chr1	36087299	36087578
chr1	36308420	36308600
chr1	36324448	36324797
chr1	36366241	36366789
chr1	36436475	36436680
chr1	36534998	36535232
chr1	36570261	36570444
chr1	36580411	36580632
chr1	36585231	36585557
chr1	36587946	36588171
chr1	36613325	36613753
chr1	36613896	36614215
chr1	36646324	36646689
chr1	36652973	36653207
chr1	36660276	36660826
chr1	36661162	36661597
chr1	36663869	36664444
chr1	36693351	36693754
chr1	36704548	36704829
chr1	36741017	36741227
chr1	36918492	36918993
chr1	36950017	36950213
chr1	36976978	36977375
chr1	36978358	36978612
chr1	37006391	37006945
chr1	37053530	37054059
chr1	37179129	37179475
chr1	37276976	37277295
chr1	37299889	37300069
chr1	37389694	37389992
chr1	37404103	37404443
chr1	37407714	37408049
chr1	37568961	37569458
chr1	37622241	37622515
chr1	37886902	37887082
chr1	37947063	37947421
chr1	38016526	38016852
chr1	38053893	38054109
chr1	38255440	38255626
chr1	38279059	38279389
chr1	38364767	38365315
chr1	38391110	38391347
chr1	38458810	38458993
chr1	38507566	38507910
chr1	38741773	38741978
chr1	38900162	38900460
chr1	38904917	38905273
chr1	39539480	39539668
chr1	39556416	39556740
chr1	39603076	39603299
chr1	39624953	39625241
chr1	39703154	39703538
chr1	39767395	39767852
chr1	39770603	39771453
chr1	39791213	39791656
chr1	39792657	39793414
chr1	39797871	39798121
chr1	39806566	39806893
chr1	39816380	39816824
chr1	39817997	39818411
chr1	39831534	39831714
chr1	39833093	39833290
chr1	39861751	39861938
chr1	39862179	39862899
chr1	39870845	39871219
chr1	39895494	39895998
chr1	39942961	39943141
chr1	39945279	39945724
chr1	39957430	39957804
chr1	39958143	39958318
chr1	39959547	39959728
chr1	39975436	39975752
chr1	39980253	39980555
chr1	39987906	39988239
chr1	39993453	39993645
chr1	39998735	39999056
chr1	39999932	40000112
chr1	40001339	40001713
chr1	40004457	40005199
chr1	40022278	40022481
chr1	40026746	40027100
chr1	40029420	40029605
chr1	40030862	40031056
chr1	40034041	40034510
chr1	40039039	40039266
chr1	40060203	40060383
chr1	40062968	40063423
chr1	40129129	40129302
chr1	40174379	40174816
chr1	40358438	40358618
chr1	40415238	40415449
chr1	41084362	41084903
chr1	41197384	41197702
chr1	41214629	41214879
chr1	41215015	41215369
chr1	41446980	41447633
chr1	41612552	41612844
chr1	41661916	41662235
chr1	41662563	41662940
chr1	41708692	41708922
chr1	41709585	41709819
chr1	41945181	41945374
chr1	42202450	42202734
chr1	42286604	42286813
chr1	42314640	42315029
chr1	42363166	42363346
chr1	42383366	42383583
chr1	42584574	42584783
chr1	42595458	42596969
chr1	42686882	42687060
chr1	42693481	42693696
chr1	42741044	42741405
chr1	42743383	42743974
chr1	42748456	42748759
chr1	42749995	42750459
chr1	42750785	42751299
chr1	42751366	42751651
chr1	42752463	42752676
chr1	42753398	42753590
chr1	42760712	42760989
chr1	42770062	42770534
chr1	42771190	42771412
chr1	42977760	42977981
chr1	43155181	43155451
chr1	43316793	43317045
chr1	43373869	43374649
chr1	43415040	43415401
chr1	43417566	43417835
chr1	43418298	43418492
chr1	43453285	43453738
chr1	43503624	43503844
chr1	43531805	43532138
chr1	43560361	43560707
chr1	43561020	43561498
chr1	43588153	43588383
chr1	43640533	43640831
chr1	43751608	43752284
chr1	43755298	43755994
chr1	43787288	43787828
chr1	43830796	43831282
chr1	44175496	44175699
chr1	44176459	44176820
chr1	44444991	44445179
chr1	44609162	44609628
chr1	44642010	44642404
chr1	44648576	44648972
chr1	45079434	45079614
chr1	45148191	45148413
chr1	45894656	45894863
chr1	45962276	45962480
chr1	46910464	46910810
chr1	50954592	50954867
chr1	51133214	51133507
chr1	51153541	51153931
chr1	51171608	51171902
chr1	51273107	51273779
chr1	51302331	51302515
chr1	51346832	51347079
chr1	51347469	51347918
chr1	51372439	51372623
chr1	51535164	51535389
chr1	51664229	51664710
chr1	51674402	51674735
chr1	51693642	51693852
chr1	51902660	51902920
chr1	51909169	51909376
chr1	51936199	51936583
chr1	51971832	51972245
chr1	52025945	52026224
chr1	52033471	52033780
chr1	52053470	52054123
chr1	52055378	52055565
chr1	52099973	52100199
chr1	52108472	52108732
chr1	52290307	52290498
chr1	52337205	52337402
chr1	52365629	52365828
chr1	52653953	52654474
chr1	52708737	52708981
chr1	52769934	52770339
chr1	52774884	52775480
chr1	52815109	52815368
chr1	52920073	52920371
chr1	53010447	53010656
chr1	53072754	53072934
chr1	53095145	53095340
chr1	53880581	53880993
chr1	53886000	53886294
chr1	54307327	54307640
chr1	54434379	54434663
chr1	54541759	54542141
chr1	54642407	54642788
chr1	54667158	54667351
chr1	54772361	54772601
chr1	54791865	54792067
chr1	54797977	54798265
chr1	54802548	54802810
chr1	54848332	54848543
chr1	54883642	54883890
chr1	54887207	54887387
chr1	54979604	54979867
chr1	55084181	55084399
chr1	55217855	55218368
chr1	55250168	55250494
chr1	55258682	55259122
chr1	55278020	55278337
chr1	55463444	55463640
chr1	55511019	55511275
chr1	55546127	55546639
chr1	55557953	55558125
chr1	55585562	55585871
chr1	55644964	55645205
chr1	55675487	55676080
chr1	55798899	55799106
chr1	55905719	55905946
chr1	56890170	56890541
chr1	57231285	57231491
chr1	57281669	57281859
chr1	57444716	57445105
chr1	57485820	57486000
chr1	57486666	57486913
chr1	57487020	57487200
chr1	57493927	57494148
chr1	57690858	57691202
chr1	57808782	57808982
chr1	57846651	57847157
chr1	57918906	57919303
chr1	57929043	57929308
chr1	57930465	57930648
chr1	57947125	57947610
chr1	57965353	57965551
chr1	58087358	58087755
chr1	58502374	58502817
chr1	58643092	58643295
chr1	58770224	58770483
chr1	59294109	59294322
chr1	59432948	59433141
chr1	59462702	59462992
chr1	59463155	59463335
chr1	59464524	59464771
chr1	59480115	59480328
chr1	59538835	59539061
chr1	59572982	59573604
chr1	59581031	59581267
chr1	59682351	59682552
chr1	59782438	59782838
chr1	59790985	59791294
chr1	59845914	59846189
chr1	59852284	59852506
chr1	59890601	59890847
chr1	59944228	59944475
chr1	59969732	59969921
chr1	60113321	60113504
chr1	60466117	60466383
chr1	60473625	60473929
chr1	60908015	60908345
chr1	61156565	61156905
chr1	61203271	61203488
chr1	61254966	61255299
chr1	61255421	61255844
chr1	61260105	61260323
chr1	61278107	61278287
chr1	61290873	61291524
chr1	61359642	61359855
chr1	61366438	61366743
chr1	61667573	61667842
chr1	61897777	61898003
chr1	61959536	61959956
chr1	62228373	62228702
chr1	62262451	62262818
chr1	62439687	62439867
chr1	62458063	62458392
chr1	62458701	62458885
chr1	62540444	62540638
chr1	62711569	62711910
chr1	62789794	62790213
chr1	62796264	62796521
chr1	62830442	62830840
chr1	62907461	62907697
chr1	62949532	62949828
chr1	62980669	62981136
chr1	62998056	62998280
chr1	63001995	63002175
chr1	63010947	63011127
chr1	63237483	63237755
chr1	63674865	63675086
chr1	63809940	63810361
chr1	63810562	63811060
chr1	63866619	63866789
chr1	63875087	63875444
chr1	63948944	63949135
chr1	63981585	63981797
chr1	64067192	64067809
chr1	64081750	64082301
chr1	64113535	64113800
chr1	64167689	64168007
chr1	64168366	64169138
chr1	64189324	64189987
chr1	64220358	64220660
chr1	64236034	64236447
chr1	64236751	64236942
chr1	64242479	64243066
chr1	64245358	64245687
chr1	64247208	64247460
chr1	64267141	64267376
chr1	64331120	64331374
chr1	64342220	64342527
chr1	64352306	64352519
chr1	64413644	64413809
chr1	64492662	64492908
chr1	64701703	64701883
chr1	64702060	64702339
chr1	64737102	64737319
chr1	64841885	64842212
chr1	64851836	64852104
chr1	64885819	64886311
chr1	64900276	64900610
chr1	64949398	64949657
chr1	64963542	64963735
chr1	65003338	65003502
chr1	65225499	65226024
chr1	65293408	65293703
chr1	66222677	66222876
chr1	66233718	66233970
chr1	66241724	66242291
chr1	66258133	66258348
chr1	66268172	66268387
chr1	66273583	66273842
chr1	66274786	66275207
chr1	66367351	66367872
chr1	66368141	66368619
chr1	66433249	66433602
chr1	66435078	66435523
chr1	66441932	66442156
chr1	66605151	66605353
chr1	66616329	66616590
chr1	66684830	66685187
chr1	66701740	66702351
chr1	66735967	66736254
chr1	66738964	66739737
chr1	66824569	66824749
chr1	66843405	66843576
chr1	66863480	66863718
chr1	66918030	66918437
chr1	67007492	67007687
chr1	67050228	67050408
chr1	67155336	67155526
chr1	67406479	67406653
chr1	67444341	67444688
chr1	68093763	68094055
chr1	68225208	68225380
chr1	68545360	68545623
chr1	69020377	69020672
chr1	69071454	69071810
chr1	69203919	69204320
chr1	69499583	69499848
chr1	69505407	69505676
chr1	69554717	69554925
chr1	70426667	70426958
chr1	70488946	70489126
chr1	70513499	70513679
chr1	70521875	70522281
chr1	71044012	71044507
chr1	71338544	71338768
chr1	71448718	71448918
chr1	71587054	71587413
chr1	71699452	71699688
chr1	71720327	71720555
chr1	72049055	72049246
chr1	72061100	72061433
chr1	72115576	72115947
chr1	72188495	72188690
chr1	72272920	72273266
chr1	72290820	72291285
chr1	72301669	72302233
chr1	72303156	72303370
chr1	72353828	72354086
chr1	72411396	72411593
chr1	72426410	72426661
chr1	72429701	72429925
chr1	72430393	72430564
chr1	72629633	72629919
chr1	72640090	72640350
chr1	72766789	72767368
chr1	72785553	72785808
chr1	72785986	72786642
chr1	72792991	72793294
chr1	72797991	72798282
chr1	72861843	72862111
chr1	72873015	72873323
chr1	72874459	72874682
chr1	72876503	72877001
chr1	72877140	72877400
chr1	72905511	72905861
chr1	72924531	72924728
chr1	73187258	73187724
chr1	73200030	73200288
chr1	73215821	73216304
chr1	73271076	73271256
chr1	73317182	73317880
chr1	73332037	73332215
chr1	73687310	73687621
chr1	73687715	73688025
chr1	73689285	73689688
chr1	73790531	73791037
chr1	73867401	73867617
chr1	73870967	73871220
chr1	73875709	73875908
chr1	73896929	73897601
chr1	73909288	73909595
chr1	73911022	73911271
chr1	73963995	73964175
chr1	73988871	73989220
chr1	73990957	73991324
chr1	74009642	74009822
chr1	74025901	74026081
chr1	74045259	74045609
chr1	74074033	74074304
chr1	74077383	74077736
chr1	74141158	74141436
chr1	74152372	74152563
chr1	74157806	74158478
chr1	74165739	74166168
chr1	74327604	74327795
chr1	74342082	74342657
chr1	74350392	74350587
chr1	74364014	74364284
chr1	74379014	74379390
chr1	74383670	74383890
chr1	74387053	74387282
chr1	74433379	74433656
chr1	74465796	74466062
chr1	74585270	74585714
chr1	74588980	74589351
chr1	74589501	74589687
chr1	74634701	74634881
chr1	74647945	74648127
chr1	74844101	74844378
chr1	74871292	74871716
chr1	75176644	75176867
chr1	75188655	75188837
chr1	75231194	75231504
chr1	75244713	75245049
chr1	75273880	75274087
chr1	75314322	75314639
chr1	75396447	75396658
chr1	75502902	75503107
chr1	75518205	75518496
chr1	75556143	75556323
chr1	75679008	75679188
chr1	75689367	75689547
chr1	75795447	75795604
chr1	76035739	76035921
chr1	76242771	76242983
chr1	76279975	76280166
chr1	76637961	76638184
chr1	76939243	76939643
chr1	77040415	77040696
chr1	77077429	77077651
chr1	77139723	77139903
chr1	77223211	77223603
chr1	77374010	77374309
chr1	77406807	77407024
chr1	77493362	77493839
chr1	77511187	77511406
chr1	77745127	77745353
chr1	78351943	78352146
chr1	78368290	78368486
chr1	78534111	78534526
chr1	78545625	78545943
chr1	78590410	78590650
chr1	78645889	78646175
chr1	78741899	78742345
chr1	78757635	78758209
chr1	78786400	78786579
chr1	78816291	78816471
chr1	78849004	78849310
chr1	79450676	79450865
chr1	79595421	79595665
chr1	79694015	79694288
chr1	79772517	79772742
chr1	79799624	79799879
chr1	79803571	79803855
chr1	79819722	79820046
chr1	79829293	79829729
chr1	79855190	79855532
chr1	79857223	79857765
chr1	79857899	79858285
chr1	79914376	79914601
chr1	79943218	79943421
chr1	80015266	80015521
chr1	80020030	80020502
chr1	80028898	80029241
chr1	80087853	80088206
chr1	80112523	80112757
chr1	80221483	80221847
chr1	80233846	80234522
chr1	80235258	80235557
chr1	80380822	80381083
chr1	80633425	80633605
chr1	80633718	80634170
chr1	80648581	80649236
chr1	80652980	80653260
chr1	80705877	80706173
chr1	80727260	80727501
chr1	80753594	80753820
chr1	80820588	80820810
chr1	80850851	80851416
chr1	81216545	81216756
chr1	81277627	81277918
chr1	81545620	81545809
chr1	81741149	81741521
chr1	81883563	81883948
chr1	82147345	82147807
chr1	82239961	82240177
chr1	82254129	82254376
chr1	82279731	82279923
chr1	82280072	82280310
chr1	82287557	82287804
chr1	82320743	82320923
chr1	82355374	82355705
chr1	82382378	82382622
chr1	82471057	82471253
chr1	82473203	82473686
chr1	82631092	82631432
chr1	82828443	82828706
chr1	82835789	82835990
chr1	83903199	83904225
chr1	84151735	84152155
chr1	84152209	84152443
chr1	84173518	84173965
chr1	84214425	84214674
chr1	84250440	84250739
chr1	84384202	84384421
chr1	84481710	84481953
chr1	84581966	84582356
chr1	84617894	84618365
chr1	84835894	84836221
chr1	87592330	87592530
chr1	87616812	87617239
chr1	87790903	87791287
chr1	87791711	87791922
chr1	87798641	87799146
chr1	87813382	87813938
chr1	87818214	87818645
chr1	87818758	87819457
chr1	87824442	87824678
chr1	87824891	87825236
chr1	87829999	87830637
chr1	87866157	87866460
chr1	87878607	87878850
chr1	87928818	87929509
chr1	87935284	87935697
chr1	87949758	87950430
chr1	88166699	88166895
chr1	88275903	88276238
chr1	88279906	88280141
chr1	88330782	88331592
chr1	88331987	88332407
chr1	88383903	88384222
chr1	88400658	88401029
chr1	88402093	88402366
chr1	88405872	88406420
chr1	88407457	88408087
chr1	88419057	88419274
chr1	88421869	88422052
chr1	88422942	88423311
chr1	88427521	88427731
chr1	88428705	88428877
chr1	88483548	88483817
chr1	88552551	88552859
chr1	88566242	88566426
chr1	88602065	88602276
chr1	88639356	88639704
chr1	88755457	88755722
chr1	88907247	88907484
chr1	88910528	88910841
chr1	88925462	88925875
chr1	88932400	88932595
chr1	89002787	89002967
chr1	89105281	89105461
chr1	89169999	89170577
chr1	89210542	89210799
chr1	89285700	89285956
chr1	89504431	89504693
chr1	89682349	89682658
chr1	89682773	89683448
chr1	89714809	89714989
chr1	89726648	89726904
chr1	89743647	89743903
chr1	89776461	89776992
chr1	89788283	89788589
chr1	89789127	89789310
chr1	89789575	89789755
chr1	89796301	89796503
chr1	89826318	89826778
chr1	90159012	90159232
chr1	90173772	90174168
chr1	90215262	90215524
chr1	90321252	90321668
chr1	90371191	90371412
chr1	90374684	90375298
chr1	90436524	90436734
chr1	90459042	90459333
chr1	90520157	90520478
chr1	90540143	90540324
chr1	90554758	90555414
chr1	90557256	90557499
chr1	90565419	90565755
chr1	90602432	90602666
chr1	90604193	90604650
chr1	90691688	90692006
chr1	90706179	90706703
chr1	90735219	90735464
chr1	90736185	90737185
chr1	90820727	90821233
chr1	90871076	90871278
chr1	90900415	90900624
chr1	90937843	90938164
chr1	90966536	90966837
chr1	91000998	91001295
chr1	91032980	91033337
chr1	91033596	91034180
chr1	91124933	91125359
chr1	91132020	91132319
chr1	91240047	91240239
chr1	91297109	91297907
chr1	91316919	91317402
chr1	91318044	91318272
chr1	91321081	91321565
chr1	91326899	91327080
chr1	91364141	91364321
chr1	91386134	91386396
chr1	91406620	91407030
chr1	91414225	91414894
chr1	91422406	91422712
chr1	91454747	91454929
chr1	91472224	91472412
chr1	91473640	91473904
chr1	91553385	91553699
chr1	91585518	91585772
chr1	91756942	91757260
chr1	91773052	91773498
chr1	91788983	91789163
chr1	91809061	91809259
chr1	91831308	91831511
chr1	92124918	92125288
chr1	92129108	92129349
chr1	92175689	92176013
chr1	92187014	92187202
chr1	92187409	92187834
chr1	92239027	92239208
chr1	92371800	92371999
chr1	92499860	92500100
chr1	92536260	92536517
chr1	92811737	92812133
chr1	92822594	92822866
chr1	92864013	92864636
chr1	92869465	92869809
chr1	92869912	92870490
chr1	92871473	92872227
chr1	92877537	92877839
chr1	92913762	92914018
chr1	92928164	92928346
chr1	92935149	92935590
chr1	92935737	92936048
chr1	92939800	92939998
chr1	92949504	92949924
chr1	92952249	92952714
chr1	92958839	92959420
chr1	92995360	92995760
chr1	93073452	93073783
chr1	93075804	93076034
chr1	93077425	93077605
chr1	93077946	93078173
chr1	93078727	93078932
chr1	93103455	93103732
chr1	93105858	93106934
chr1	93107847	93108092
chr1	93309688	93310181
chr1	93310598	93311084
chr1	93333108	93333459
chr1	93353151	93353423
chr1	93354778	93355229
chr1	93356017	93356324
chr1	93422452	93422765
chr1	93436846	93437043
chr1	93444247	93444433
chr1	93459869	93460117
chr1	93460645	93460825
chr1	93497275	93497796
chr1	93748027	93748242
chr1	93800253	93800518
chr1	93953758	93953954
chr1	93982917	93983112
chr1	93986529	93986828
chr1	93988953	93989181
chr1	93995083	93995390
chr1	93996031	93997516
chr1	94033654	94034353
chr1	94073841	94074116
chr1	94092084	94092712
chr1	94108529	94109370
chr1	94112202	94112416
chr1	94112601	94112899
chr1	94120784	94121034
chr1	94154734	94155068
chr1	94160797	94161211
chr1	94240365	94240608
chr1	94293175	94293374
chr1	94333476	94333805
chr1	94334286	94334736
chr1	94342488	94342680
chr1	94531659	94531865
chr1	94595678	94595858
chr1	94639510	94639762
chr1	94641427	94641672
chr1	94665941	94666153
chr1	94666394	94666623
chr1	94683712	94684097
chr1	94729254	94729521
chr1	94734524	94734836
chr1	94830916	94831331
chr1	94966892	94967094
chr1	94981897	94982093
chr1	95080804	95080984
chr1	95104229	95104454
chr1	95106755	95107191
chr1	95113290	95113936
chr1	95117505	95117967
chr1	95123863	95124137
chr1	95170717	95170925
chr1	95239339	95239542
chr1	95285904	95286091
chr1	95341353	95341557
chr1	95374732	95375171
chr1	95375627	95375865
chr1	95582022	95582257
chr1	95591514	95591845
chr1	95623603	95623802
chr1	95700147	95700402
chr1	95931932	95932129
chr1	96309623	96309939
chr1	96400359	96400737
chr1	97115644	97115824
chr1	97164570	97165154
chr1	97260513	97260733
chr1	99437213	99437927
chr1	99450218	99451118
chr1	99519875	99520062
chr1	99730383	99730621
chr1	99740243	99740469
chr1	99759912	99760170
chr1	99820239	99820484
chr1	99950664	99950892
chr1	100086813	100087084
chr1	104067202	104067575
chr1	106643346	106643840
chr1	106651163	106651375
chr1	106664818	106665078
chr1	106665799	106666126
chr1	106666950	106667211
chr1	106668609	106668858
chr1	106724679	106725001
chr1	106734783	106735177
chr1	106744929	106745175
chr1	106745437	106745888
chr1	107007978	107008248
chr1	107095898	107096147
chr1	107171830	107172068
chr1	107252107	107252330
chr1	107281167	107281347
chr1	107802758	107803396
chr1	107893979	107894178
chr1	107910439	107910619
chr1	107958514	107958694
chr1	107967898	107968082
chr1	108049653	108049879
chr1	108051847	108052261
chr1	108067870	108068279
chr1	108096171	108096629
chr1	108098559	108098936
chr1	108101041	108101221
chr1	108128456	108128667
chr1	108137640	108138168
chr1	108139506	108139696
chr1	108140068	108140210
chr1	108213438	108213801
chr1	108277076	108277391
chr1	108299568	108300110
chr1	108303557	108303868
chr1	108324748	108325167
chr1	108499677	108499897
chr1	108550226	108550431
chr1	108656374	108656656
chr1	108766573	108767039
chr1	109847023	109847334
chr1	109872202	109872834
chr1	109998901	109999338
chr1	110349350	110349533
chr1	115254562	115255467
chr1	115313441	115313840
chr1	115455524	115455748
chr1	115529925	115530206
chr1	115600101	115600306
chr1	115934510	115934833
chr1	115935987	115936363
chr1	116227182	116227461
chr1	116570609	116570930
chr1	117849797	117849977
chr1	118180636	118180869
chr1	120191563	120191850
chr1	120285402	120285612
chr1	120295457	120295852
chr1	120353580	120354010
chr1	120377952	120378113
chr1	120419729	120419948
chr1	120540444	120540814
chr1	120591103	120591303
chr1	120656246	120656627
chr1	120813133	120813395
chr1	120873115	120873735
chr1	120877128	120877638
chr1	120879039	120879407
chr1	120916296	120916520
chr1	120930268	120930908
chr1	120946530	120947065
chr1	120994603	120994894
chr1	121099072	121099247
chr1	121152009	121152681
chr1	121153262	121153836
chr1	121156032	121156249
chr1	121162184	121162412
chr1	121225445	121225994
chr1	121285259	121285637
chr1	121286746	121286926
chr1	121350324	121350685
chr1	121381942	121382133
chr1	121388695	121388901
chr1	121401120	121401256
chr1	121414755	121414983
chr1	121430032	121430300
chr1	121834411	121834598
chr1	121932118	121932498
chr1	121952911	121953158
chr1	122012069	122012735
chr1	122017407	122017594
chr1	122039078	122039371
chr1	122104123	122104450
chr1	122120345	122120534
chr1	122142145	122142738
chr1	122253997	122254272
chr1	122363507	122363670
chr1	122574006	122574186
chr1	122633012	122633192
chr1	122679602	122679782
chr1	122751883	122752147
chr1	122981902	122982242
chr1	122983675	122984365
chr1	123008545	123008822
chr1	123009353	123009693
chr1	123073765	123074219
chr1	123211643	123211979
chr1	123224530	123224710
chr1	123243360	123243606
chr1	123349195	123349442
chr1	126294047	126294372
chr1	126852900	126853077
chr1	127262376	127262572
chr1	127351689	127351869
chr1	127422659	127423088
chr1	127456861	127457501
chr1	127536102	127536654
chr1	127832028	127832246
chr1	127920810	127921025
chr1	127921138	127921480
chr1	128025811	128026058
chr1	128074793	128074990
chr1	128238438	128238646
chr1	128335412	128335606
chr1	128366880	128367083
chr1	128381204	128381626
chr1	128494024	128494290
chr1	128552772	128553290
chr1	128578491	128578909
chr1	128580328	128581248
chr1	128634741	128634961
chr1	128696256	128696436
chr1	128726940	128727132
chr1	128762091	128762641
chr1	128821720	128822691
chr1	128829661	128829892
chr1	128889071	128889364
chr1	128889869	128890112
chr1	129004050	129004404
chr1	129136454	129136852
chr1	129235725	129236009
chr1	129245067	129245622
chr1	129265075	129265645
chr1	129311220	129311404
chr1	129355622	129355809
chr1	129670402	129670729
chr1	129842299	129842592
chr1	129977969	129978171
chr1	129979451	129979609
chr1	130181788	130182031
chr1	130301487	130302063
chr1	130368657	130369366
chr1	130457876	130458310
chr1	130475057	130475481
chr1	130482457	130482757
chr1	130492168	130492478
chr1	130506451	130506603
chr1	130529747	130529936
chr1	130546145	130546418
chr1	130556657	130556837
chr1	130729826	130730020
chr1	132540743	132540953
chr1	132892079	132892429
chr1	132959264	132959850
chr1	132975309	132975851
chr1	133030798	133031101
chr1	133031718	133032072
chr1	133073932	133074131
chr1	133248171	133248463
chr1	133250712	133250870
chr1	133275023	133275716
chr1	133275916	133276096
chr1	133281004	133281249
chr1	133328404	133328835
chr1	133334644	133334983
chr1	133337208	133337450
chr1	133357662	133358080
chr1	133368323	133368540
chr1	133370127	133370650
chr1	133375426	133375606
chr1	133378948	133379134
chr1	133379979	133380380
chr1	133385985	133386193
chr1	133389048	133389367
chr1	133410947	133411227
chr1	133420374	133420657
chr1	133422402	133422728
chr1	133425396	133425612
chr1	133451848	133452072
chr1	133554721	133554907
chr1	133562594	133562848
chr1	133593000	133593186
chr1	133634009	133634256
chr1	133648528	133648902
chr1	133662251	133662502
chr1	133667305	133667567
chr1	133724437	133724658
chr1	133806753	133806992
chr1	133878078	133878473
chr1	133903928	133904161
chr1	133961582	133961945
chr1	134007852	134008178
chr1	134042838	134043043
chr1	134118724	134119111
chr1	134215788	134216282
chr1	134219247	134219507
chr1	134223504	134223712
chr1	134230363	134230734
chr1	134267425	134267653
chr1	134271970	134272214
chr1	134327459	134327736
chr1	134328411	134328660
chr1	134330030	134330247
chr1	134365788	134365978
chr1	134373511	134373828
chr1	134422511	134422723
chr1	134439255	134439435
chr1	134454626	134454942
chr1	134457689	134457869
chr1	134503522	134503752
chr1	134610458	134610674
chr1	134655304	134655469
chr1	134683558	134683762
chr1	134740752	134741055
chr1	134750004	134750212
chr1	134778000	134778351
chr1	134814224	134814416
chr1	134828930	134829366
chr1	134874124	134874361
chr1	134930670	134930930
chr1	134942591	134942869
chr1	134958372	134958553
chr1	134965203	134965842
chr1	135075323	135075598
chr1	135084601	135084834
chr1	135164318	135164873
chr1	135253291	135253484
chr1	135261557	135261932
chr1	135289818	135290031
chr1	135294227	135294614
chr1	135331024	135331212
chr1	135372143	135372322
chr1	135389050	135389421
chr1	135592619	135592809
chr1	135609695	135609893
chr1	135760235	135760513
chr1	135789761	135789951
chr1	135812570	135812853
chr1	135858146	135858378
chr1	135885554	135885838
chr1	135935040	135935242
chr1	135945139	135945429
chr1	135957648	135958043
chr1	135959145	135960349
chr1	135960982	135961230
chr1	135974782	135975019
chr1	135975542	135976036
chr1	135992707	135993452
chr1	136000428	136000800
chr1	136101866	136102220
chr1	136106807	136107043
chr1	136116113	136116514
chr1	136129508	136130170
chr1	136140904	136141124
chr1	136141673	136142146
chr1	136162383	136162650
chr1	136199089	136199276
chr1	136244430	136244664
chr1	136302562	136302767
chr1	136413180	136413418
chr1	136453438	136453739
chr1	136852398	136852605
chr1	136908567	136908752
chr1	136917619	136917832
chr1	137045610	137045858
chr1	137052927	137053283
chr1	137054870	137055051
chr1	137055142	137056026
chr1	137057179	137057420
chr1	137059345	137059568
chr1	137066137	137066317
chr1	137084840	137085117
chr1	137092287	137092842
chr1	137100873	137101082
chr1	137155711	137155892
chr1	137177390	137177592
chr1	137271500	137272306
chr1	137307596	137307864
chr1	137400131	137400400
chr1	137409898	137410356
chr1	137411667	137412382
chr1	137415366	137415546
chr1	137445333	137445808
chr1	137454648	137455081
chr1	137459963	137460143
chr1	137462225	137462725
chr1	137464607	137464996
chr1	137477610	137477877
chr1	137480213	137480399
chr1	137515703	137516030
chr1	137522536	137522726
chr1	137540754	137540974
chr1	137556018	137556296
chr1	137566426	137566725
chr1	137567077	137567359
chr1	137573671	137573851
chr1	137577773	137578059
chr1	137583246	137583762
chr1	137590798	137591133
chr1	137631208	137631594
chr1	137636048	137636306
chr1	137637625	137638089
chr1	137667841	137668054
chr1	137677847	137678104
chr1	137679701	137679881
chr1	137698685	137698899
chr1	137718359	137718568
chr1	137749031	137749329
chr1	138015513	138015726
chr1	138016537	138016903
chr1	138062179	138062357
chr1	138228488	138228833
chr1	138259268	138259501
chr1	138352334	138352806
chr1	138434062	138434238
chr1	138665595	138665960
chr1	138678162	138678568
chr1	138678918	138679158
chr1	138944009	138944189
chr1	138988411	138988650
chr1	139151725	139151937
chr1	139275197	139275436
chr1	139350165	139350345
chr1	139350514	139350694
chr1	139487736	139488178
chr1	139514015	139514417
chr1	139515896	139516063
chr1	139553439	139554078
chr1	139794808	139795201
chr1	139796774	139797139
chr1	139799985	139800213
chr1	139824519	139824847
chr1	139825185	139825506
chr1	139835394	139835659
chr1	139926181	139926615
chr1	140045517	140045784
chr1	140222640	140223441
chr1	140465020	140465200
chr1	140473458	140473742
chr1	140491598	140491827
chr1	140492766	140493095
chr1	140514672	140514852
chr1	140583378	140583563
chr1	140879148	140879331
chr1	140889006	140889584
chr1	141090634	141090873
chr1	141106521	141106731
chr1	141129224	141129556
chr1	141233592	141234139
chr1	141242990	141243694
chr1	141275450	141275630
chr1	142994198	142994480
chr1	143000555	143000918
chr1	144976725	144977391
chr1	145041689	145042068
chr1	145042183	145042473
chr1	145096892	145097110
chr1	145155118	145155408
chr1	145488198	145488408
chr1	145554141	145554344
chr1	145667326	145667506
chr1	145667673	145667952
chr1	145684344	145684703
chr1	145751266	145751468
chr1	145837040	145837234
chr1	145966738	145966952
chr1	148691159	148691623
chr1	151709910	151710158
chr1	151800357	151800550
chr1	152383034	152383215
chr1	152383373	152383570
chr1	152587932	152588312
chr1	152606561	152607048
chr1	152608056	152608378
chr1	152623112	152623388
chr1	152625169	152625379
chr1	152633933	152634144
chr1	152704922	152705100
chr1	152720443	152720703
chr1	152737089	152737495
chr1	152789230	152789530
chr1	152789803	152790086
chr1	152797105	152797568
chr1	152909594	152909789
chr1	153083813	153084161
chr1	153098000	153098276
chr1	153190122	153190313
chr1	153275285	153275640
chr1	153275786	153276144
chr1	153479243	153479457
chr1	153500638	153500888
chr1	153533187	153533372
chr1	153547034	153547262
chr1	153628674	153628854
chr1	153725503	153725830
chr1	153791961	153792237
chr1	153792473	153792815
chr1	153800805	153801050
chr1	153824001	153824300
chr1	153831226	153831461
chr1	153855458	153855887
chr1	153937571	153937941
chr1	154012479	154013041
chr1	154035956	154036179
chr1	154050422	154050684
chr1	154061601	154061883
chr1	154135105	154135425
chr1	154247885	154248157
chr1	154257791	154258164
chr1	154261586	154262189
chr1	154286986	154287408
chr1	154302448	154302652
chr1	154308857	154309342
chr1	154309539	154309881
chr1	154332764	154333031
chr1	154364268	154364514
chr1	154403321	154403955
chr1	154436555	154436733
chr1	154439859	154440300
chr1	154471095	154471285
chr1	154487797	154488129
chr1	154593605	154593846
chr1	154639883	154640332
chr1	154640698	154640920
chr1	154662463	154662681
chr1	154665075	154665297
chr1	154751741	154751931
chr1	154858671	154859126
chr1	154861458	154862417
chr1	154880184	154880500
chr1	154884738	154885218
chr1	154887182	154887523
chr1	154906929	154907270
chr1	154931253	154931707
chr1	154955012	154955346
chr1	155022072	155022252
chr1	155039095	155039494
chr1	155049295	155049726
chr1	155155231	155155603
chr1	155156020	155156445
chr1	155164428	155164645
chr1	155348897	155349077
chr1	155353343	155353835
chr1	155435151	155435352
chr1	155482661	155482886
chr1	155488863	155489608
chr1	155550475	155551294
chr1	155577924	155578119
chr1	155596378	155596660
chr1	155746759	155747297
chr1	155747606	155747790
chr1	155821434	155821833
chr1	155949899	155950526
chr1	155997174	155997806
chr1	156003907	156004229
chr1	156347710	156347891
chr1	156667191	156667371
chr1	156830115	156830780
chr1	156842855	156843057
chr1	156873057	156873237
chr1	156903312	156903659
chr1	156910077	156910530
chr1	156930087	156930650
chr1	156939591	156939872
chr1	156940693	156940884
chr1	156959871	156960286
chr1	156969783	156969963
chr1	157006164	157006348
chr1	157020027	157020207
chr1	157039883	157040137
chr1	157057114	157057562
chr1	157059655	157060371
chr1	157080963	157081877
chr1	157085706	157085880
chr1	157274684	157274881
chr1	157545489	157545780
chr1	157573129	157573324
chr1	157644706	157645009
chr1	157653651	157653899
chr1	158171239	158171421
chr1	158397766	158398054
chr1	158404339	158404523
chr1	158544233	158544419
chr1	158547202	158547390
chr1	158684670	158685250
chr1	158697928	158698115
chr1	158861359	158861659
chr1	158868884	158869072
chr1	158920301	158920636
chr1	158927633	158928588
chr1	158969118	158969963
chr1	158978460	158978724
chr1	159032641	159032821
chr1	159040650	159040889
chr1	159044670	159045002
chr1	159156446	159156667
chr1	159298523	159298737
chr1	159347623	159347842
chr1	159348060	159348421
chr1	159356215	159356543
chr1	159370375	159370838
chr1	159377420	159377622
chr1	159429485	159429674
chr1	159430378	159430558
chr1	159431679	159432012
chr1	159436741	159436985
chr1	159437352	159437691
chr1	159438080	159438352
chr1	159448337	159448597
chr1	159449521	159449773
chr1	159484277	159484577
chr1	159656273	159656486
chr1	159671232	159671651
chr1	159676707	159676966
chr1	159758067	159758378
chr1	159870362	159870690
chr1	159913399	159913663
chr1	160077676	160077994
chr1	160091727	160092042
chr1	160156882	160157113
chr1	160157351	160158014
chr1	160197207	160197396
chr1	160240526	160240943
chr1	160286338	160286603
chr1	160294717	160294915
chr1	160312570	160312913
chr1	160316922	160317347
chr1	160419721	160420163
chr1	160484160	160484674
chr1	160512080	160512260
chr1	160571491	160571788
chr1	161039518	161039731
chr1	161093267	161093571
chr1	161323304	161323672
chr1	161343230	161343979
chr1	161345617	161346164
chr1	161423871	161424744
chr1	161447689	161447954
chr1	161524357	161524659
chr1	161591351	161591660
chr1	161600908	161601679
chr1	161616554	161616877
chr1	161671339	161671629
chr1	161671831	161672295
chr1	161690949	161691574
chr1	161705382	161705577
chr1	161782290	161782570
chr1	161795805	161796154
chr1	162143149	162143487
chr1	162208494	162208659
chr1	162281899	162282342
chr1	162300583	162301049
chr1	162371851	162372271
chr1	162450870	162451050
chr1	162461499	162461912
chr1	162623159	162623490
chr1	162704334	162704577
chr1	162779540	162779720
chr1	162786095	162786597
chr1	162937978	162938252
chr1	163151201	163151462
chr1	163154890	163155356
chr1	163177403	163177607
chr1	163180220	163180501
chr1	163393912	163394167
chr1	163537702	163537909
chr1	163619096	163619505
chr1	163806911	163807153
chr1	163930120	163930549
chr1	163968011	163968347
chr1	164011865	164012396
chr1	164038280	164038714
chr1	164126888	164127512
chr1	164139736	164140058
chr1	164519673	164519860
chr1	164531458	164531745
chr1	164761919	164762120
chr1	164762302	164762692
chr1	165182542	165182734
chr1	165187390	165187914
chr1	165269055	165269360
chr1	165316413	165316691
chr1	165333692	165333963
chr1	165353900	165354098
chr1	165374030	165374246
chr1	165548447	165548648
chr1	165570691	165571140
chr1	165675869	165676096
chr1	165924622	165925073
chr1	166114312	166114507
chr1	166191740	166191923
chr1	166250965	166251145
chr1	166292295	166292478
chr1	166322430	166322610
chr1	166325290	166325470
chr1	166388661	166388841
chr1	166440857	166441075
chr1	166479764	166480092
chr1	166634850	166635121
chr1	166652318	166652550
chr1	166976796	166977001
chr1	167005851	167006307
chr1	167049457	167049801
chr1	167091174	167091466
chr1	167104338	167104523
chr1	167117599	167117795
chr1	167121783	167122044
chr1	167166641	167166821
chr1	167232974	167233304
chr1	167250757	167251002
chr1	167251864	167252080
chr1	167487059	167487230
chr1	167519364	167519773
chr1	167548653	167548838
chr1	167572986	167573477
chr1	167717333	167717513
chr1	167717614	167717794
chr1	167744620	167744834
chr1	167782360	167782579
chr1	167844271	167844556
chr1	167865055	167865700
chr1	167878394	167878663
chr1	167896684	167896971
chr1	167973936	167974292
chr1	167979273	167979513
chr1	168040191	168040371
chr1	168065172	168065408
chr1	168122663	168122949
chr1	168174482	168174686
chr1	168210726	168211094
chr1	168212720	168213256
chr1	168269209	168269556
chr1	168328721	168329327
chr1	168331578	168331832
chr1	168332184	168332501
chr1	168737366	168737611
chr1	168815643	168815873
chr1	168830669	168831112
chr1	168861804	168862020
chr1	168943529	168943709
chr1	169012956	169013208
chr1	169170068	169170756
chr1	169200123	169200874
chr1	169294851	169295035
chr1	169324090	169324583
chr1	169976429	169977095
chr1	170110859	170111106
chr1	170127745	170127977
chr1	170128519	170128704
chr1	170145668	170145848
chr1	170146321	170146767
chr1	170175750	170176204
chr1	170189136	170189433
chr1	170217070	170217335
chr1	170218049	170218366
chr1	170221242	170221713
chr1	170285155	170285399
chr1	170288192	170288465
chr1	170312995	170313280
chr1	170314494	170314727
chr1	170322358	170322580
chr1	170362026	170362291
chr1	170403924	170404167
chr1	170480216	170480577
chr1	170690504	170690754
chr1	170717839	170718019
chr1	170981584	170982015
chr1	171023673	171024144
chr1	171258010	171258216
chr1	171389556	171389880
chr1	171392922	171393174
chr1	171397854	171398371
chr1	171414746	171415094
chr1	171415326	171416123
chr1	171899260	171899684
chr1	171916425	171916665
chr1	172066534	172066723
chr1	172090286	172090594
chr1	172354630	172355338
chr1	172390051	172390629
chr1	172430011	172430315
chr1	172434609	172434826
chr1	172451675	172452051
chr1	172464107	172464451
chr1	172465289	172465558
chr1	172485181	172485397
chr1	172574449	172574814
chr1	172585591	172586207
chr1	172595399	172595756
chr1	172628018	172628427
chr1	172635014	172635617
chr1	172651731	172652050
chr1	172797817	172798060
chr1	172798674	172799068
chr1	172963950	172964261
chr1	173031895	173032105
chr1	173032808	173032971
chr1	173041175	173041355
chr1	173041665	173041949
chr1	173048590	173048836
chr1	173180545	173180772
chr1	173192854	173193684
chr1	173211664	173211845
chr1	173341307	173341598
chr1	173342239	173342442
chr1	173342678	173342870
chr1	173370248	173370686
chr1	173389980	173390202
chr1	173434169	173434494
chr1	173455083	173455329
chr1	173461631	173461821
chr1	173603261	173603512
chr1	173947064	173947396
chr1	173957372	173957698
chr1	173978662	173979000
chr1	174029676	174030044
chr1	174062367	174062717
chr1	174131309	174131666
chr1	174132460	174132687
chr1	174133059	174133617
chr1	174143938	174144196
chr1	174172566	174172876
chr1	174272760	174273411
chr1	174279737	174280897
chr1	174288627	174288906
chr1	174295062	174295303
chr1	174412303	174412490
chr1	174563214	174563377
chr1	176452535	176452744
chr1	176480545	176480890
chr1	176969775	176970048
chr1	177058578	177059163
chr1	177315634	177316187
chr1	177340011	177340275
chr1	177408290	177408545
chr1	177422848	177423067
chr1	177583396	177583611
chr1	177622697	177622899
chr1	178040744	178040910
chr1	178704764	178704968
chr1	178743679	178743874
chr1	178744154	178744530
chr1	178780860	178781117
chr1	178916469	178916680
chr1	178917208	178917438
chr1	178924131	178924626
chr1	178924883	178925166
chr1	178929321	178929506
chr1	178945077	178945376
chr1	179080407	179080967
chr1	179105553	179105922
chr1	179187350	179187530
chr1	179237936	179238117
chr1	179268958	179269376
chr1	179341534	179341837
chr1	179374590	179374912
chr1	179375616	179375846
chr1	179377246	179377537
chr1	179377679	179378144
chr1	179378391	179378571
chr1	179485708	179486164
chr1	179503570	179503802
chr1	179553365	179553863
chr1	179570432	179571025
chr1	179576168	179576619
chr1	179630799	179631112
chr1	180248213	180249351
chr1	180266551	180266876
chr1	180287949	180288431
chr1	180299483	180299663
chr1	180336378	180336608
chr1	180379366	180379580
chr1	180557098	180557537
chr1	180733365	180733611
chr1	180899414	180899599
chr1	180971993	180972460
chr1	180991970	180992276
chr1	181012475	181012674
chr1	181036887	181037137
chr1	181052998	181053247
chr1	181076988	181077287
chr1	181179563	181179743
chr1	181376712	181376974
chr1	181639571	181639991
chr1	181772698	181773025
chr1	181775045	181775269
chr1	181793562	181793779
chr1	182102066	182102360
chr1	182154695	182154893
chr1	182242485	182242668
chr1	182242810	182243412
chr1	182261474	182261914
chr1	182288359	182288559
chr1	182295296	182295576
chr1	182320423	182321082
chr1	182323561	182323751
chr1	182350888	182351177
chr1	182571423	182571640
chr1	182743648	182744079
chr1	182778531	182779217
chr1	182780999	182781189
chr1	182825700	182825880
chr1	182863867	182864113
chr1	182875434	182875614
chr1	182875822	182876030
chr1	182917954	182918134
chr1	182939982	182940167
chr1	182945642	182946075
chr1	182946667	182947155
chr1	182947498	182947710
chr1	183171415	183171692
chr1	183323766	183324346
chr1	183345825	183346006
chr1	183352975	183353260
chr1	183376117	183376552
chr1	183376681	183377019
chr1	183414807	183415281
chr1	183459503	183459760
chr1	183482631	183482923
chr1	183538171	183538373
chr1	183568270	183568480
chr1	183570684	183571032
chr1	183583702	183584063
chr1	183790820	183791056
chr1	183811591	183812645
chr1	183819024	183819341
chr1	183928917	183929122
chr1	183983132	183983545
chr1	184012222	184012433
chr1	184016984	184017375
chr1	184019111	184019630
chr1	184020151	184020367
chr1	184021001	184021192
chr1	184033530	184034178
chr1	184044088	184044548
chr1	184045939	184046507
chr1	184046642	184046872
chr1	184328353	184328639
chr1	184391945	184392331
chr1	184405090	184405679
chr1	184469333	184469541
chr1	184499264	184499460
chr1	184506295	184506475
chr1	184601012	184601276
chr1	184613071	184613454
chr1	184848890	184849411
chr1	184881516	184881770
chr1	184913283	184913463
chr1	184921134	184921375
chr1	185341177	185341750
chr1	185345486	185345899
chr1	185375098	185375372
chr1	185397769	185398415
chr1	185607378	185607569
chr1	185607639	185608017
chr1	185616213	185616410
chr1	185616562	185616781
chr1	185857864	185858155
chr1	185889951	185890309
chr1	186072546	186072726
chr1	186263883	186264063
chr1	186264869	186265516
chr1	186272644	186273332
chr1	186277576	186278068
chr1	186393820	186394002
chr1	186499379	186499583
chr1	186518316	186518496
chr1	186572578	186572923
chr1	186694133	186694365
chr1	186751597	186751782
chr1	186759535	186759787
chr1	186823815	186823997
chr1	187024792	187025293
chr1	187252464	187252646
chr1	187265562	187265779
chr1	187317496	187317920
chr1	187334904	187335560
chr1	187370398	187370575
chr1	187396614	187396791
chr1	187397011	187397256
chr1	187441628	187441921
chr1	187565097	187565764
chr1	187793116	187793373
chr1	188074226	188074439
chr1	188085423	188085751
chr1	188196816	188197120
chr1	188272668	188272952
chr1	188298768	188299052
chr1	188334445	188334678
chr1	188433696	188434068
chr1	188451429	188451797
chr1	188464981	188465315
chr1	188479009	188479453
chr1	188506567	188506747
chr1	188615794	188615980
chr1	188876396	188876919
chr1	188900529	188900722
chr1	189074910	189075154
chr1	189106840	189107045
chr1	189155117	189155342
chr1	189160332	189160512
chr1	189473906	189474141
chr1	189485167	189485347
chr1	189799355	189799851
chr1	189838392	189838615
chr1	189942038	189942436
chr1	190483165	190483400
chr1	190484827	190485151
chr1	190553101	190553405
chr1	190569660	190569910
chr1	190632320	190632491
chr1	190657882	190658096
chr1	190754404	190754597
chr1	190772238	190772538
chr1	190839253	190839751
chr1	191011509	191012206
chr1	191052589	191052812
chr1	191134067	191134469
chr1	191263016	191263229
chr1	191444150	191444375
chr1	191468789	191469173
chr1	191469269	191469550
chr1	191511943	191512482
chr1	191555624	191555944
chr1	191654712	191654994
chr1	191751612	191752140
chr1	191903823	191904322
chr1	191961728	191962205
chr1	191993115	191993358
chr1	192014189	192014421
chr1	192258890	192259070
chr1	192480121	192480364
chr1	192485800	192485980
chr1	192505977	192506656
chr1	192528316	192528466
chr1	192551875	192552600
chr1	192651540	192651727
chr1	192803001	192803315
chr1	192819486	192819847
chr1	192946738	192946972
chr1	193078365	193078690
chr1	193116404	193116564
chr1	193221138	193221327
chr1	193259213	193259612
chr1	193292757	193293041
chr1	193293118	193293328
chr1	193294621	193294894
chr1	193319123	193319528
chr1	193351035	193351232
chr1	193399698	193399946
chr1	193465450	193465678
chr1	193632465	193633204
chr1	193801026	193801329
chr1	193805302	193805723
chr1	193813941	193814167
chr1	193894076	193894462
chr1	194516812	194517071
chr1	194581929	194582121
chr1	194660713	194661263
chr1	194915347	194915697
chr1	194915971	194916154
chr1	194956323	194956543
chr1	194977332	194977724
chr1	194996099	194996278
chr1	195015603	195015862
chr1	195064658	195064980
chr1	195082385	195082672
chr1	195086385	195086569
chr1	195090983	195091232
chr1	195099175	195099429
chr1	195142294	195142531
chr1	195143359	195143573
chr1	195161033	195161258
chr1	195164547	195164939
chr1	195171297	195171502
chr1	195185463	195185649
chr1	195194142	195194599
chr1	195211725	195212118
chr1	195212379	195212790
chr1	195259745	195260200
chr1	195279920	195280342
chr1	195372324	195372699
chr1	195503845	195504025
chr1	195560221	195560537
chr1	195578040	195578532
chr1	195776108	195776383
chr1	195845522	195845837
chr1	196034275	196035037
chr1	196049328	196049610
chr1	196057364	196057583
chr1	196066201	196066403
chr1	196108139	196108411
chr1	196129666	196130099
chr1	196187651	196187836
chr1	196189381	196189605
chr1	196330476	196330660
chr1	196413816	196414008
chr1	196439627	196440013
chr1	196440129	196440597
chr1	196445855	196446146
chr1	196455266	196455901
chr1	196484823	196485076
chr1	196486769	196486962
chr1	196504032	196504562
chr1	196508216	196508547
chr1	196547531	196547743
chr1	196565927	196566516
chr1	196569078	196569590
chr1	196573044	196573423
chr1	196582288	196582489
chr1	196634549	196634909
chr1	196711575	196711801
chr1	196711914	196712297
chr1	196782018	196782253
chr1	196804311	196804719
chr1	196957098	196957354
chr1	197067657	197068080
chr10	3080823	3081061
chr10	3135111	3135323
chr10	3187227	3187500
chr10	3187585	3187810
chr10	3196424	3196924
chr10	3227574	3228117
chr10	3234492	3234821
chr10	3429559	3429839
chr10	4052343	4052544
chr10	4338565	4338843
chr10	4478386	4478753
chr10	4846606	4846786
chr10	5035609	5036127
chr10	5058675	5058901
chr10	5235580	5235760
chr10	5764246	5764644
chr10	5879121	5879390
chr10	5943864	5944094
chr10	5959420	5959666
chr10	6005273	6005463
chr10	6012073	6012253
chr10	6012988	6013175
chr10	6164927	6165105
chr10	6225557	6225790
chr10	6233692	6233922
chr10	6238294	6238954
chr10	6240295	6240897
chr10	6266429	6266615
chr10	6366004	6366390
chr10	6367039	6367643
chr10	6367902	6368098
chr10	6449041	6449223
chr10	6526951	6527231
chr10	6630618	6630793
chr10	6649141	6649895
chr10	6650670	6651113
chr10	6660390	6660570
chr10	6712023	6712568
chr10	6715390	6715702
chr10	6749469	6749815
chr10	6773187	6773461
chr10	6814898	6815173
chr10	6836515	6836868
chr10	6918592	6918893
chr10	6931429	6931785
chr10	6951614	6952322
chr10	6980370	6980550
chr10	7013323	7013564
chr10	7302010	7302451
chr10	7324947	7325438
chr10	7512604	7512814
chr10	7561482	7561909
chr10	7662895	7663081
chr10	7755228	7755439
chr10	7809181	7809373
chr10	7895859	7896841
chr10	8007179	8007388
chr10	8043336	8043591
chr10	8059507	8059751
chr10	8059912	8060124
chr10	8111143	8111313
chr10	8238535	8238746
chr10	8402767	8402960
chr10	8480436	8480795
chr10	8482058	8482258
chr10	8521066	8521393
chr10	8524182	8524464
chr10	8527439	8527648
chr10	8605806	8606502
chr10	8688319	8688679
chr10	8881416	8881764
chr10	8951618	8951850
chr10	8972357	8972665
chr10	8992210	8992395
chr10	9047833	9048013
chr10	9370221	9370487
chr10	9429720	9429997
chr10	9827029	9827209
chr10	10245668	10245848
chr10	10471421	10471579
chr10	10989084	10989281
chr10	10994173	10994615
chr10	11025788	11026124
chr10	11595136	11595328
chr10	11826824	11827157
chr10	11962774	11963109
chr10	12084658	12084855
[truncated: 22,760 more rows]

## Sheet: SOX9
chr1	4847608	4847880
chr1	5012830	5013268
chr1	5219024	5219244
chr1	9535245	9535425
chr1	9554513	9554897
chr1	9560285	9560654
chr1	9601709	9602049
chr1	9617628	9618063
chr1	9620185	9620621
chr1	9621662	9621845
chr1	9738449	9738623
chr1	10027967	10028284
chr1	11990660	11990949
chr1	12006903	12007088
chr1	12634704	12635030
chr1	13362538	13362729
chr1	13926199	13926452
chr1	13990999	13991179
chr1	14170371	14170708
chr1	14174446	14174647
chr1	14188975	14189344
chr1	14209051	14209254
chr1	14282063	14282236
chr1	14282401	14282640
chr1	16112930	16113166
chr1	16609381	16609561
chr1	17439414	17439711
chr1	17828600	17828792
chr1	19840147	19840378
chr1	20048405	20048599
chr1	20166540	20166752
chr1	20810301	20810542
chr1	20857532	20857846
chr1	21042765	21043124
chr1	21795148	21795398
chr1	22601769	22601949
chr1	23221655	23221861
chr1	23771693	23771967
chr1	23853266	23853497
chr1	24237316	24237709
chr1	24238379	24238559
chr1	25561251	25561461
chr1	25949280	25949505
chr1	33099339	33099593
chr1	33989806	33989986
chr1	34207594	34207958
chr1	34212226	34212412
chr1	34213166	34213347
chr1	34224108	34224348
chr1	34496166	34496346
chr1	34496485	34496698
chr1	34640742	34641019
chr1	34721848	34722484
chr1	34723011	34723652
chr1	35868306	35868576
chr1	36366300	36366685
chr1	36502067	36502247
chr1	36532417	36532608
chr1	36568565	36568759
chr1	36604070	36604240
chr1	36613318	36613876
chr1	36661229	36661546
chr1	36663927	36664311
chr1	36693390	36693692
chr1	36704550	36704813
chr1	36976987	36977310
chr1	37006438	37006888
chr1	37053814	37054007
chr1	37179138	37179431
chr1	37277034	37277232
chr1	37389734	37390036
chr1	37404119	37404441
chr1	37407708	37408055
chr1	37569233	37569413
chr1	37622315	37622554
chr1	38053957	38054256
chr1	38279105	38279382
chr1	38319354	38319529
chr1	38364968	38365190
chr1	38391122	38391333
chr1	38458745	38459007
chr1	38507514	38507849
chr1	38814635	38814933
chr1	38900162	38900351
chr1	39767510	39767701
chr1	39770663	39771367
chr1	39791162	39791482
chr1	39792622	39793425
chr1	39806578	39806815
chr1	39816420	39816684
chr1	39862490	39862746
chr1	39895594	39896072
chr1	39945272	39945665
chr1	39975470	39975730
chr1	39980339	39980576
chr1	39998586	39999031
chr1	40001334	40001726
chr1	40004421	40005112
chr1	40034154	40034442
chr1	40174458	40174807
chr1	41084348	41084892
chr1	41214981	41215327
chr1	41446983	41447400
chr1	41661970	41662223
chr1	41662576	41662902
chr1	42314785	42315085
chr1	42595824	42596539
chr1	42693500	42693706
chr1	42748506	42748758
chr1	42749978	42750268
chr1	42751070	42751270
chr1	42752233	42752629
chr1	42771270	42771504
chr1	43373990	43374608
chr1	43415016	43415377
chr1	43453372	43453788
chr1	43531847	43532121
chr1	43561314	43561485
chr1	43588123	43588430
chr1	43640527	43640862
chr1	43751623	43752185
chr1	43755328	43755901
chr1	43787346	43787749
chr1	43830971	43831206
chr1	43990611	43990835
chr1	44175588	44175832
chr1	44641858	44642348
chr1	44648557	44648924
chr1	45894639	45894869
chr1	45962258	45962469
chr1	50954586	50954872
chr1	51273126	51273483
chr1	51347472	51347863
chr1	51535219	51535462
chr1	51664305	51664576
chr1	51936332	51936564
chr1	51972007	51972187
chr1	52025983	52026169
chr1	52033483	52033753
chr1	52053509	52054124
chr1	52290044	52290314
chr1	52775045	52775379
chr1	52815147	52815455
chr1	53010422	53010686
chr1	53880714	53881071
chr1	53886037	53886287
chr1	54307447	54307627
chr1	54541814	54542100
chr1	54642410	54642699
chr1	55084191	55084470
chr1	55144724	55145010
chr1	55217911	55218445
chr1	55250295	55250475
chr1	55462548	55462780
chr1	55546196	55546534
chr1	55675578	55676063
chr1	56890208	56890500
chr1	57030157	57030355
chr1	57281677	57281857
chr1	57323648	57323847
chr1	57444782	57445070
chr1	57463424	57463625
chr1	57486682	57486915
chr1	57690744	57691157
chr1	57846668	57847127
chr1	57919013	57919216
chr1	57947183	57947438
chr1	58087324	58087777
chr1	58643056	58643337
chr1	59479970	59480302
chr1	59573069	59573420
chr1	59782533	59782762
chr1	59791006	59791208
chr1	59846703	59846888
chr1	59890598	59890803
chr1	60466226	60466427
chr1	61156655	61156854
chr1	61203190	61203549
chr1	61255410	61255778
chr1	61291085	61291439
chr1	61959541	61959828
chr1	62228415	62228610
chr1	62262515	62262732
chr1	62789850	62790309
chr1	62980784	62981115
chr1	63810591	63810865
chr1	63866585	63866765
chr1	63875092	63875410
chr1	63975949	63976129
chr1	63981610	63981790
chr1	64067296	64067815
chr1	64081800	64082202
chr1	64113619	64113818
chr1	64168114	64168461
chr1	64168709	64168911
chr1	64189333	64189606
chr1	64189702	64189949
chr1	64220404	64220590
chr1	64236072	64236395
chr1	64242512	64242911
chr1	64247221	64247486
chr1	64584435	64584609
chr1	64702038	64702363
chr1	64737173	64737360
chr1	64784268	64784564
chr1	64841901	64842140
chr1	64886032	64886190
chr1	65225585	65225930
chr1	65293496	65293690
chr1	66241911	66242264
chr1	66274816	66275174
chr1	66367372	66367615
chr1	66433338	66433549
chr1	66435288	66435468
chr1	66605151	66605369
chr1	66663927	66664136
chr1	66684801	66685204
chr1	66701748	66702116
chr1	66739202	66739693
chr1	67444340	67444710
chr1	69071536	69071799
chr1	69204012	69204304
chr1	69499548	69499820
chr1	70426730	70426915
chr1	70522084	70522264
chr1	71044216	71044462
chr1	72061148	72061452
chr1	72301782	72302179
chr1	72429669	72429880
chr1	72629603	72629887
chr1	72766973	72767319
chr1	72785630	72785810
chr1	72786204	72786631
chr1	72797995	72798253
chr1	72873040	72873220
chr1	72874252	72874447
chr1	72876549	72876892
chr1	72879565	72879787
chr1	73317206	73317886
chr1	73687381	73687561
chr1	73687719	73688024
chr1	73689369	73689631
chr1	73790606	73791099
chr1	73867411	73867625
chr1	73897180	73897563
chr1	73988887	73989118
chr1	73990979	73991313
chr1	74045245	74045622
chr1	74141179	74141420
chr1	74157967	74158412
chr1	74165735	74165962
chr1	74331260	74331648
chr1	74342292	74342683
chr1	74379107	74379328
chr1	74433405	74433663
chr1	75188485	75188853
chr1	75314132	75314477
chr1	75396686	75396866
chr1	75475971	75476171
chr1	76242821	76242975
chr1	76939325	76939667
chr1	77374124	77374298
chr1	78534152	78534529
chr1	78545664	78545893
chr1	78742011	78742283
chr1	78757701	78758199
chr1	79449071	79449251
chr1	79595452	79595647
chr1	79772534	79772710
chr1	79829348	79829651
chr1	79857177	79857631
chr1	79857922	79858284
chr1	80015230	80015527
chr1	80235263	80235542
chr1	80337228	80337505
chr1	80633746	80634082
chr1	80648663	80648995
chr1	80652987	80653235
chr1	80705905	80706197
chr1	80820576	80820782
chr1	80850992	80851338
chr1	81277674	81277876
chr1	81883538	81883868
chr1	82147358	82147729
chr1	82279808	82280142
chr1	82473316	82473743
chr1	82631192	82631406
chr1	83903529	83903832
chr1	83903988	83904239
chr1	84152254	84152434
chr1	84582029	84582414
chr1	87798635	87798852
chr1	87813547	87813753
chr1	87819131	87819332
chr1	87824877	87825178
chr1	87830316	87830602
chr1	87866154	87866427
chr1	87928820	87929413
chr1	87949852	87950450
chr1	88051215	88051425
chr1	88330856	88331526
chr1	88402137	88402354
chr1	88405940	88406289
chr1	88421811	88422146
chr1	88423085	88423327
chr1	88552574	88552829
chr1	88602163	88602343
chr1	88639410	88639607
chr1	88925673	88925853
chr1	89170097	89170504
chr1	89504435	89504671
chr1	89682832	89683391
chr1	89743660	89743902
chr1	89776803	89776991
chr1	89788354	89788539
chr1	89789177	89789357
chr1	89826418	89826723
chr1	90173725	90174239
chr1	90374688	90375171
chr1	90436492	90436707
chr1	90520126	90520451
chr1	90554814	90555407
chr1	90557258	90557414
chr1	90604132	90604567
chr1	90706318	90706609
chr1	90736648	90737081
chr1	90820755	90821265
chr1	90937832	90938178
chr1	91001074	91001281
chr1	91032864	91033173
chr1	91033590	91034254
chr1	91125014	91125400
chr1	91297191	91297801
chr1	91321117	91321523
chr1	91406662	91406961
chr1	91414420	91414721
chr1	91473621	91473848
chr1	92124909	92125218
chr1	92129080	92129349
chr1	92175644	92175965
chr1	92187461	92187837
chr1	92499918	92500121
chr1	92822649	92822831
chr1	92864154	92864685
chr1	92869414	92869596
chr1	92870187	92870388
chr1	92871481	92871930
chr1	92872645	92872839
chr1	92935167	92935575
chr1	92935748	92935942
chr1	92952249	92952696
chr1	92958889	92959324
chr1	92961835	92962008
chr1	93073486	93073733
chr1	93078007	93078207
chr1	93103508	93103688
chr1	93105880	93106882
chr1	93146633	93146815
chr1	93309849	93310069
chr1	93310674	93310979
chr1	93333196	93333385
chr1	93353180	93353383
chr1	93354833	93355280
chr1	93355882	93356204
chr1	93422525	93422697
chr1	93436939	93437134
chr1	93459830	93460045
chr1	93629149	93629318
chr1	93747989	93748238
chr1	93995116	93995348
chr1	93996112	93996513
chr1	93996951	93997222
chr1	94033773	94034227
chr1	94076947	94077164
chr1	94092308	94092710
chr1	94108621	94109337
chr1	94112572	94112878
chr1	94240427	94240607
chr1	94333483	94333740
chr1	94641484	94641653
chr1	94683769	94684092
chr1	94830869	94831057
chr1	95106809	95107207
chr1	95113749	95113986
chr1	95117503	95117726
chr1	95123945	95124212
chr1	95239374	95239574
chr1	95240091	95240262
chr1	95591548	95591774
chr1	96309742	96309918
chr1	96400388	96400697
chr1	99437306	99437641
chr1	99450221	99450813
chr1	99451735	99451966
chr1	99820239	99820426
chr1	102313283	102313830
chr1	104067202	104067494
chr1	106643349	106643752
chr1	106664897	106665135
chr1	106666970	106667159
chr1	106668621	106668843
chr1	106724766	106724946
chr1	106734843	106735023
chr1	106744919	106745129
chr1	106745572	106745875
chr1	107560136	107560508
chr1	108051713	108052289
chr1	108067975	108068318
chr1	108096251	108096602
chr1	108098547	108098900
chr1	108137672	108137990
chr1	108213494	108213798
chr1	108299582	108299762
chr1	108324851	108325131
chr1	108766793	108766960
chr1	109847105	109847293
chr1	109872229	109872437
chr1	109999017	109999355
chr1	115254787	115255292
chr1	115313476	115313850
chr1	115529949	115530179
chr1	115936002	115936318
chr1	116227261	116227400
chr1	118180625	118180884
chr1	120191561	120191804
chr1	120207758	120207945
chr1	120295435	120295737
chr1	120378022	120378196
chr1	120540585	120540765
chr1	120873210	120873696
chr1	120877242	120877467
chr1	120879065	120879321
chr1	120930357	120930819
chr1	120994587	120994839
chr1	121152046	121152495
chr1	121153383	121153791
chr1	121156081	121156283
chr1	121225498	121225911
chr1	121285337	121285576
chr1	121350325	121350617
chr1	121430093	121430273
chr1	121775560	121775774
chr1	121932157	121932315
chr1	122012091	122012737
chr1	122104191	122104348
chr1	122142271	122142658
chr1	122254017	122254294
chr1	122498747	122498922
chr1	122983787	122984041
chr1	123008564	123008770
chr1	123009367	123009603
chr1	123073810	123074115
chr1	123211667	123211911
chr1	127457002	127457291
chr1	127536145	127536445
chr1	127559637	127559979
chr1	127921102	127921450
chr1	128381232	128381552
chr1	128494091	128494319
chr1	128552952	128553237
chr1	128580464	128581203
chr1	128726831	128727182
chr1	128762169	128762439
chr1	128821772	128822464
chr1	128889075	128889336
chr1	129004095	129004351
chr1	129136434	129136796
chr1	129235761	129235977
chr1	129245138	129245532
chr1	129265095	129265616
chr1	129311218	129311398
chr1	129670468	129670798
chr1	129999793	129999992
chr1	130256186	130256383
chr1	130301537	130302032
chr1	130457861	130458177
chr1	130482470	130482662
chr1	130492194	130492375
chr1	130546087	130546368
chr1	132892130	132892393
chr1	132959341	132959845
chr1	132975379	132975768
chr1	133030825	133031083
chr1	133031797	133032020
chr1	133248251	133248414
chr1	133275274	133275744
chr1	133328458	133328772
chr1	133334726	133334894
chr1	133357848	133358018
chr1	133370183	133370623
chr1	133378966	133379157
chr1	133380006	133380334
chr1	133386016	133386219
chr1	133410934	133411120
chr1	133423856	133424591
chr1	133593001	133593219
chr1	133634043	133634223
chr1	133648598	133648961
chr1	133806869	133807104
chr1	134118790	134119094
chr1	134215850	134216067
chr1	134373535	134373803
chr1	134419739	134419949
chr1	134740814	134740994
chr1	134749997	134750190
chr1	134965555	134965853
chr1	135027672	135027878
chr1	135164546	135164811
chr1	135818026	135818252
chr1	135935011	135935228
chr1	135959185	135959529
chr1	135959741	135960285
chr1	135992892	135993311
chr1	136129466	136130173
chr1	136141785	136141955
chr1	137055174	137056086
chr1	137084880	137085114
chr1	137092638	137092835
chr1	137210188	137210501
chr1	137271801	137272225
chr1	137409961	137410393
chr1	137411786	137412223
chr1	137445400	137445687
chr1	137454644	137454855
chr1	137462394	137462727
chr1	137464670	137464998
chr1	137556048	137556311
chr1	137583393	137583712
chr1	137631202	137631514
chr1	137636059	137636307
chr1	137677883	137678063
chr1	137749026	137749220
chr1	137914492	137914688
chr1	138130678	138130858
chr1	138228565	138228759
chr1	138259268	138259448
chr1	138352434	138352810
chr1	139487904	139488183
chr1	139514048	139514234
chr1	139553784	139554046
chr1	139796839	139797142
chr1	139824597	139824842
chr1	139825185	139825500
chr1	139835423	139835684
chr1	139926285	139926575
chr1	140045523	140045714
chr1	140222735	140223134
chr1	140492751	140493039
chr1	140889383	140889504
chr1	141129302	141129557
chr1	141233644	141234143
chr1	141243065	141243675
chr1	143000623	143000810
chr1	144976947	144977364
chr1	145041762	145041999
chr1	145042189	145042455
chr1	145667666	145667857
chr1	148691153	148691614
chr1	152383074	152383254
chr1	152383378	152383558
chr1	152587935	152588154
chr1	152606576	152607084
chr1	152608071	152608466
chr1	152720418	152720668
chr1	152737186	152737499
chr1	152789305	152789530
chr1	152797131	152797546
chr1	153083961	153084139
chr1	153602289	153602467
chr1	153725572	153725932
chr1	153792482	153792662
chr1	153831259	153831430
chr1	153855733	153855913
chr1	154012463	154012987
chr1	154050379	154050734
chr1	154061600	154061883
chr1	154247849	154248078
chr1	154254833	154254998
chr1	154257801	154258179
chr1	154261669	154261835
chr1	154287027	154287385
chr1	154309032	154309284
chr1	154309537	154309800
chr1	154333521	154333837
chr1	154403277	154403719
chr1	154439933	154440220
chr1	154639842	154640333
chr1	154662495	154662729
chr1	154750403	154750642
chr1	154861537	154862285
chr1	154887275	154887515
chr1	154906973	154907193
chr1	154931294	154931696
chr1	155039110	155039427
chr1	155049315	155049684
chr1	155155286	155155620
chr1	155156105	155156410
chr1	155353389	155353820
chr1	155482674	155482894
chr1	155489089	155489604
chr1	155550533	155551201
chr1	155949893	155950438
chr1	155997276	155997772
chr1	156830480	156830760
chr1	156910204	156910454
chr1	156930341	156930736
chr1	156939608	156939800
chr1	156961111	156961287
chr1	157057153	157057453
chr1	157059724	157059998
chr1	157081077	157081817
chr1	158397788	158397960
chr1	158649043	158649419
chr1	158684801	158685127
chr1	158920350	158920637
chr1	158927597	158928482
chr1	158969412	158969776
chr1	159356229	159356508
chr1	159377404	159377587
chr1	159437455	159437674
chr1	159484313	159484495
chr1	159671274	159671619
chr1	159758116	159758374
chr1	160156835	160157141
chr1	160157626	160157938
chr1	160240647	160240915
chr1	160312612	160312878
chr1	160317031	160317241
chr1	160419802	160420131
chr1	160484217	160484636
chr1	160571552	160571740
chr1	161323336	161323664
chr1	161343402	161343996
chr1	161345944	161346126
chr1	161423951	161424715
chr1	161600896	161601623
chr1	161616605	161616779
chr1	161671392	161671622
chr1	161671801	161672231
chr1	161690960	161691517
chr1	161705339	161705612
chr1	161795791	161796116
chr1	162125190	162125432
chr1	162282117	162282302
chr1	162300873	162301053
chr1	162371904	162372255
chr1	162461563	162461832
chr1	162786084	162786545
chr1	163154936	163155301
chr1	163203679	163203939
chr1	163537684	163538024
chr1	163806910	163807074
chr1	163930199	163930565
chr1	163966699	163966885
chr1	164126945	164127491
chr1	164139833	164140038
chr1	164224423	164224613
chr1	164762409	164762635
chr1	165182557	165182709
chr1	165269110	165269368
chr1	165333695	165333952
chr1	165353870	165354097
chr1	165570678	165571143
chr1	167391163	167391369
chr1	167486955	167487232
chr1	167519413	167519741
chr1	167564672	167564859
chr1	167844298	167844485
chr1	167865155	167865449
chr1	167878413	167878609
chr1	168065226	168065410
chr1	168174523	168174663
chr1	168210736	168211068
chr1	168212718	168213099
chr1	168328481	168328844
chr1	168328941	168329332
chr1	168331633	168331813
chr1	168332265	168332514
chr1	168815648	168815862
chr1	169170023	169170657
chr1	169200165	169200830
chr1	169976433	169976940
chr1	170175817	170176059
chr1	170221393	170221587
chr1	170312985	170313217
chr1	170362431	170362648
chr1	170403832	170404096
chr1	170480203	170480444
chr1	170981627	170981949
chr1	171023698	171024060
chr1	171292711	171292910
chr1	171398000	171398329
chr1	171414764	171415082
chr1	171415302	171415965
chr1	171899198	171899585
chr1	172354831	172355148
chr1	172390085	172390345
chr1	172485111	172485302
chr1	172585650	172586051
chr1	172595371	172595738
chr1	172635242	172635613
chr1	172651766	172652067
chr1	173193396	173193655
chr1	173433518	173433776
chr1	173957395	173957682
chr1	174029735	174029959
chr1	174056750	174056930
chr1	174062495	174062678
chr1	174131307	174131518
chr1	174133419	174133602
chr1	174272791	174273312
chr1	174279967	174280506
chr1	174412178	174412347
chr1	177315720	177316155
chr1	178005684	178005844
chr1	178731176	178731362
chr1	178744292	178744514
chr1	178744850	178745092
chr1	178924259	178924629
chr1	178945114	178945295
chr1	179080429	179080969
chr1	179105582	179105897
chr1	179269066	179269281
chr1	179341611	179341790
chr1	179374595	179374889
chr1	179377224	179377553
chr1	179377683	179378015
chr1	179485816	179486073
chr1	179553410	179553815
chr1	179576273	179576591
chr1	179630836	179631032
chr1	180942470	180942687
chr1	180992051	180992245
chr1	181076975	181077214
chr1	182126173	182126369
chr1	182220997	182221173
chr1	182243144	182243246
chr1	182261411	182261696
chr1	182295335	182295592
chr1	182320610	182321074
chr1	182350939	182351058
chr1	182743668	182743934
chr1	182778738	182779158
chr1	182875721	182876079
chr1	182945782	182945962
chr1	182946665	182946848
chr1	183323878	183324281
chr1	183376181	183376368
chr1	183414844	183415164
chr1	183459528	183459710
chr1	183723732	183723998
chr1	183811626	183812608
chr1	183983187	183983375
chr1	184016977	184017206
chr1	184020154	184020338
chr1	184033530	184034039
chr1	184044101	184044575
chr1	184045972	184046541
chr1	184392008	184392309
chr1	184405136	184405647
chr1	184613091	184613342
chr1	184849018	184849388
chr1	185345555	185345798
chr1	185397718	185398082
chr1	185607618	185608024
chr1	185616219	185616449
chr1	185858091	185858285
chr1	185889974	185890220
chr1	186264860	186265168
chr1	186272733	186273320
chr1	186277602	186278164
chr1	187024882	187025262
chr1	187265567	187265747
chr1	187317449	187317618
chr1	187397040	187397246
chr1	188451572	188451770
chr1	188479054	188479431
chr1	188876411	188876827
chr1	189942092	189942364
chr1	190839304	190839671
chr1	191011543	191012133
chr1	191052599	191052817
chr1	191331399	191331574
chr1	191468829	191469128
chr1	191469253	191469558
chr1	191511940	191512362
chr1	191555635	191555993
chr1	191903850	191904236
chr1	191961895	191962133
chr1	192506122	192506585
chr1	192551933	192552430
chr1	192886699	192886869
chr1	192946768	192946999
chr1	193078451	193078646
chr1	193116346	193116569
chr1	193220983	193221316
chr1	193221439	193221645
chr1	193259315	193259507
chr1	193293004	193293259
chr1	193319132	193319478
chr1	193632559	193632993
chr1	193645184	193645443
chr1	193730399	193730637
chr1	193801113	193801293
chr1	193805363	193805664
chr1	193885613	193885793
chr1	193894195	193894425
chr1	194660945	194661102
chr1	194915479	194915664
chr1	194977399	194977673
chr1	195015586	195015852
chr1	195064712	195064944
chr1	195082442	195082622
chr1	195099282	195099499
chr1	195104649	195104863
chr1	195143342	195143552
chr1	195164534	195164927
chr1	195194331	195194511
chr1	195259859	195260119
chr1	195372380	195372560
chr1	195578043	195578488
chr1	195845526	195845808
chr1	196034349	196034942
chr1	196413820	196413997
chr1	196439661	196439957
chr1	196440349	196440529
chr1	196455371	196455884
chr1	196484846	196485039
chr1	196504188	196504458
chr1	196547560	196547763
chr1	196565961	196566476
chr1	196568984	196569570
chr1	196573074	196573403
chr1	196582330	196582510
chr1	196634629	196634820
chr1	196782041	196782250
chr1	196804329	196804694
chr1	197067658	197067987
chr10	3080816	3081049
chr10	3187243	3187446
chr10	3187580	3187795
chr10	3196562	3196752
chr10	3227647	3228101
chr10	3234603	3234798
chr10	4338629	4338829
chr10	4478350	4478575
chr10	5058667	5058897
chr10	6225543	6225811
chr10	6238272	6238840
chr10	6240404	6240888
chr10	6365951	6366134
chr10	6367043	6367492
chr10	6367913	6368092
chr10	6649089	6649578
chr10	6650753	6651112
chr10	6712097	6712315
chr10	6749515	6749773
chr10	6836606	6836786
chr10	6849466	6849698
chr10	6918473	6918833
chr10	6952029	6952262
chr10	6986675	6986855
chr10	7302035	7302477
chr10	7324942	7325429
chr10	7748856	7749036
chr10	7896394	7896847
chr10	8059458	8059713
chr10	8480564	8480704
chr10	8481991	8482171
chr10	8521068	8521366
chr10	8524190	8524370
chr10	8605835	8606263
chr10	8618634	8618848
chr10	8688351	8688622
chr10	9429788	9429970
chr10	10994295	10994555
chr10	11826826	11827076
chr10	12456688	12457000
chr10	12587793	12588016
chr10	12728073	12728322
chr10	13108400	13108623
chr10	13434390	13434746
chr10	13636845	13637102
chr10	14052508	14053011
chr10	14202261	14202689
chr10	14211693	14211980
chr10	17276330	17276575
chr10	17282417	17282902
chr10	17442053	17442234
chr10	17442895	17443128
chr10	18150778	18151127
chr10	18202710	18202890
chr10	18228468	18228649
chr10	18419980	18420285
chr10	18536418	18536659
chr10	19029846	19030171
chr10	19283377	19283682
chr10	19555733	19556072
chr10	19765968	19766315
chr10	19922609	19922923
chr10	19946596	19946839
chr10	20031995	20032298
chr10	20635469	20635661
chr10	20655212	20655502
chr10	20776177	20776357
chr10	21356518	21356862
chr10	21398903	21399347
chr10	21400634	21400892
chr10	21549023	21549444
chr10	21643376	21643690
chr10	22466124	22466572
chr10	22735944	22736270
chr10	23394526	23394895
chr10	23507102	23507330
chr10	24036957	24037284
chr10	24156947	24157354
chr10	24589662	24589843
chr10	24736010	24736213
chr10	24743399	24743986
chr10	25091920	25092130
chr10	26017076	26017286
chr10	26280301	26280627
chr10	26492099	26492369
chr10	26492583	26493113
chr10	26575653	26576049
chr10	27817543	27817759
chr10	27886999	27887288
chr10	29033008	29033348
chr10	30347415	30347604
chr10	30892885	30893457
chr10	30973047	30973230
chr10	31015548	31015917
chr10	31197620	31197922
chr10	31223903	31224349
chr10	31312642	31312853
chr10	31351904	31352043
chr10	32589442	32589745
chr10	32600120	32600343
chr10	32601776	32602118
chr10	32899511	32900387
chr10	32915848	32916101
chr10	33739261	33739598
chr10	33991446	33991930
chr10	34001795	34002088
chr10	35374696	35374876
chr10	36269347	36269512
chr10	36287153	36287423
chr10	36694011	36694360
chr10	36748488	36748845
chr10	36798305	36798613
chr10	36856959	36857149
chr10	36858689	36858869
chr10	36860588	36860876
chr10	36890441	36890645
chr10	36970608	36971366
chr10	37097839	37098142
chr10	37117139	37117436
chr10	37386881	37387115
chr10	37403013	37403272
chr10	37411759	37412071
chr10	37440614	37440931
chr10	37532133	37532769
chr10	38028822	38029203
chr10	38077732	38078053
chr10	38139655	38139835
chr10	38273322	38273866
chr10	38274951	38275252
chr10	38575029	38575268
chr10	38891567	38891736
chr10	38893056	38893307
chr10	38947351	38947685
chr10	38986500	38986713
chr10	39010865	39012062
chr10	39041028	39041428
chr10	39191567	39191918
chr10	39222059	39222374
chr10	39254261	39254780
chr10	39255218	39255494
chr10	39260728	39261156
chr10	39261362	39261668
chr10	39261806	39262221
chr10	39307048	39307516
chr10	39365639	39365998
chr10	39366286	39366818
chr10	39379188	39380204
chr10	39392168	39392894
chr10	39394652	39394967
chr10	39450931	39451354
chr10	39451724	39451961
chr10	40021991	40022311
chr10	40092123	40092517
chr10	40163933	40164113
chr10	40166575	40166737
chr10	40219653	40220013
chr10	40236266	40236621
chr10	40239524	40239849
chr10	40445005	40445223
chr10	40560432	40560623
chr10	40603132	40603607
chr10	40690763	40690944
chr10	41238955	41239233
chr10	41466507	41466687
chr10	41654383	41654954
chr10	41791197	41791486
chr10	41812285	41812773
chr10	41996492	41996673
chr10	41997817	41998085
chr10	42053649	42053870
chr10	42067046	42067324
chr10	42130609	42130977
chr10	42614089	42614400
chr10	42654568	42654748
chr10	42763270	42763589
chr10	42875001	42875094
chr10	42941119	42941299
chr10	42967920	42968142
chr10	42972200	42972434
chr10	42996060	42996457
chr10	43298706	43298958
chr10	43471694	43472263
chr10	43693080	43693289
chr10	43726575	43726813
chr10	43838247	43838758
chr10	44101156	44101508
chr10	44108459	44108781
chr10	44273516	44273703
chr10	44325085	44325279
chr10	44373740	44373935
chr10	44717234	44717725
chr10	44729466	44729744
chr10	44823109	44823307
chr10	44842435	44842645
chr10	44848932	44849151
chr10	46018268	46018519
chr10	46417784	46418089
chr10	46822393	46822864
chr10	47084957	47085249
chr10	51681401	51681584
chr10	52423980	52424190
chr10	52462473	52462935
chr10	52499975	52500062
chr10	53257511	53257724
chr10	54271996	54272244
chr10	56613121	56613370
chr10	56655011	56655220
chr10	57427805	57428022
chr10	57495710	57495889
chr10	57504449	57504778
chr10	57542318	57542685
chr10	57548515	57548848
chr10	57785626	57785841
chr10	57801083	57801357
chr10	57804546	57804821
chr10	57832950	57833136
chr10	57846171	57846423
chr10	58063710	58064604
chr10	58065422	58065768
chr10	58067548	58067732
chr10	58412775	58412955
chr10	58553089	58553324
chr10	58657717	58657932
chr10	58703893	58704087
chr10	58724901	58725082
chr10	58900367	58900647
chr10	58933302	58933593
chr10	58980142	58980298
chr10	59130224	59130499
chr10	59236301	59236465
chr10	59249034	59249478
chr10	59353061	59353385
chr10	59359904	59360121
chr10	59360351	59360613
chr10	59362481	59362923
chr10	59372420	59372599
chr10	59411669	59411858
chr10	59414484	59415056
chr10	59614081	59614316
chr10	59656352	59656753
chr10	59657835	59658169
chr10	59665518	59665928
chr10	59673205	59673415
chr10	59748746	59748973
chr10	59814545	59814727
chr10	59860069	59860284
chr10	60270617	60270893
chr10	60284654	60284834
chr10	60717567	60717816
chr10	60724642	60724870
chr10	60740656	60741088
chr10	60828770	60828984
chr10	60843049	60843358
chr10	60846190	60846372
chr10	60851850	60852154
chr10	60898079	60898274
chr10	61038889	61039069
chr10	61158150	61158357
chr10	61657291	61657632
chr10	61756890	61757190
chr10	61783245	61783584
chr10	61803157	61803245
chr10	61819205	61819499
chr10	61864658	61864862
chr10	62041188	62041371
chr10	62114006	62114288
chr10	62202850	62203040
chr10	62328071	62328437
chr10	62706419	62706630
chr10	63343193	63343484
chr10	63417192	63417408
chr10	64178627	64178841
chr10	66327282	66327516
chr10	66383150	66383488
chr10	66384044	66384552
chr10	66406692	66407026
chr10	66457230	66457611
chr10	66457818	66458236
chr10	66466654	66466874
chr10	66481623	66482033
chr10	66524061	66524610
chr10	66579108	66579362
chr10	66606475	66606722
chr10	66607051	66607325
chr10	66645472	66645647
chr10	66648353	66648582
chr10	66688820	66689288
chr10	66750767	66751072
chr10	67308827	67309007
chr10	67417185	67417602
chr10	67428517	67429282
chr10	67442344	67442524
chr10	67674801	67675057
chr10	67836764	67837065
chr10	68258237	68258607
chr10	68262671	68262996
chr10	68717254	68717540
chr10	68789209	68789524
chr10	69057193	69057583
chr10	69074674	69075146
chr10	69995047	69995250
chr10	70179858	70180154
chr10	70229295	70229495
chr10	70251969	70252154
chr10	70269568	70270034
chr10	70290921	70291421
chr10	70295506	70295698
chr10	70323999	70324240
chr10	70412688	70412892
chr10	70429819	70429996
chr10	70491984	70492171
chr10	70700675	70700849
chr10	70939586	70939837
chr10	72806867	72807058
chr10	73576884	73577174
chr10	73823908	73824075
chr10	74415369	74415801
chr10	74429646	74429824
chr10	74499728	74500024
chr10	74569692	74570028
chr10	74583873	74584146
chr10	74859667	74859948
chr10	74928786	74929024
chr10	75018731	75019212
chr10	75021380	75021646
chr10	75166941	75167496
chr10	75204730	75204910
chr10	75226986	75227202
chr10	75236101	75236335
chr10	75290490	75290780
chr10	75291160	75291677
chr10	75406887	75407254
chr10	75495179	75495366
chr10	75713672	75713962
chr10	75716277	75716647
chr10	75718448	75718628
chr10	75826118	75826359
chr10	75905375	75905717
chr10	75931489	75931818
chr10	75994135	75994375
chr10	76365438	76365681
chr10	76424681	76424930
chr10	76578926	76579110
chr10	76586690	76587024
chr10	76613966	76614181
chr10	76692270	76692743
chr10	76706537	76706787
chr10	77046666	77046899
chr10	77073327	77073590
chr10	77085929	77086263
chr10	77097370	77097933
chr10	77129252	77129415
chr10	77647863	77648043
chr10	77699108	77699288
chr10	77699713	77699962
chr10	77760727	77760908
chr10	77768767	77769195
chr10	77801000	77801223
chr10	78033766	78033988
chr10	78186106	78186364
chr10	79017776	79018051
chr10	79069303	79069571
chr10	79072108	79072373
chr10	79237123	79237460
chr10	79266543	79267021
chr10	79270752	79270913
chr10	79316162	79316424
chr10	79316909	79317442
chr10	79321174	79321450
chr10	79363820	79364183
chr10	79395533	79395859
chr10	79396967	79397405
chr10	79459070	79459377
chr10	79497967	79498228
chr10	79511098	79511575
chr10	79526007	79526202
chr10	79578201	79578572
chr10	79581291	79581584
chr10	79612012	79612397
chr10	79613044	79613224
chr10	79618018	79618452
chr10	79619762	79620053
chr10	79622442	79623014
chr10	79635709	79635918
chr10	79711996	79712286
chr10	79722651	79722875
chr10	79765181	79765708
chr10	79792596	79792899
chr10	79849063	79849243
chr10	79850390	79850570
chr10	79862356	79862599
chr10	79896396	79896649
chr10	80024245	80024433
chr10	80040449	80040624
chr10	80140954	80141171
chr10	80164695	80164894
chr10	80204982	80205233
chr10	80217776	80217999
chr10	80289029	80289255
chr10	80319027	80319317
chr10	80320094	80320381
chr10	80363543	80363908
chr10	80399258	80399568
chr10	80435582	80435765
chr10	80473609	80473917
chr10	80477668	80477907
chr10	80499949	80500243
chr10	80600036	80600350
chr10	80617497	80617858
chr10	80630481	80630790
chr10	80637736	80637993
chr10	80645319	80645756
chr10	80755748	80756181
chr10	80783238	80783413
chr10	80813193	80813508
chr10	80847011	80847245
chr10	80864663	80864940
chr10	80870427	80870633
chr10	80874315	80874500
chr10	80877525	80877837
chr10	80879653	80879996
chr10	80894352	80894622
chr10	80895692	80895959
chr10	81014390	81014682
chr10	81033487	81033836
chr10	81034380	81034606
chr10	81059844	81060685
chr10	81063660	81063927
chr10	82201751	82201931
chr10	82226721	82226967
chr10	82321710	82322002
chr10	82447895	82448076
chr10	82450306	82450534
chr10	82494376	82494557
chr10	82525080	82525391
chr10	82579703	82580015
chr10	82593377	82593809
chr10	82596677	82597022
chr10	82605784	82606229
chr10	82624879	82625373
chr10	82708564	82708716
chr10	82724167	82724351
chr10	82822763	82823008
chr10	83093721	83093981
chr10	83100129	83100360
chr10	83523428	83523842
chr10	84039382	84039661
chr10	84109348	84109871
chr10	84148348	84148528
chr10	84148704	84148967
chr10	84149609	84149886
chr10	84173608	84173957
chr10	84218621	84218952
chr10	84379892	84380205
chr10	84426404	84426747
chr10	84486140	84486328
chr10	84590718	84590987
chr10	85060732	85061140
chr10	85379641	85380040
chr10	85416202	85416558
chr10	85656652	85656837
chr10	85838579	85839143
chr10	85888610	85888794
chr10	85920033	85920318
chr10	86168153	86168543
chr10	86270793	86271085
chr10	86282510	86283069
chr10	86521114	86521294
chr10	86910392	86910797
chr10	86951589	86951770
chr10	86955375	86955623
chr10	87356042	87356272
chr10	87389987	87390332
chr10	87609599	87609797
chr10	88053876	88054109
chr10	88913283	88913539
chr10	89833489	89833747
chr10	89843528	89844044
chr10	89945615	89945956
chr10	89957610	89958196
chr10	89994476	89994650
chr10	90634276	90634455
chr10	91182367	91183384
chr10	91498912	91499292
chr10	91967133	91967349
chr10	92300419	92300636
chr10	92718122	92718432
chr10	92724433	92724654
chr10	92738006	92738858
chr10	92739128	92739486
chr10	92895180	92895551
chr10	92915960	92916191
chr10	93199027	93199380
chr10	93199986	93200242
chr10	93234615	93235091
chr10	93246486	93246837
chr10	93263093	93263320
chr10	93498564	93498738
chr10	93592414	93592650
chr10	93693361	93693703
chr10	93759967	93760147
chr10	93814066	93814294
chr10	93846702	93846899
chr10	93889139	93889414
chr10	93943543	93943840
chr10	93957187	93957351
chr10	93986536	93986756
chr10	93989686	93989914
chr10	93992857	93993372
chr10	94012371	94012551
chr10	94012676	94013106
chr10	94292212	94292684
chr10	94476713	94476904
chr10	94495742	94495986
chr10	94498094	94498472
chr10	94605507	94606076
chr10	94645813	94646026
chr10	94662160	94662725
chr10	94667149	94667339
chr10	94702283	94702447
chr10	94799584	94799894
chr10	95280387	95280700
chr10	95403078	95403255
chr10	95556776	95557044
chr10	95557274	95557548
chr10	95653191	95653512
chr10	95771561	95772211
chr10	95772432	95772681
chr10	95862258	95862647
chr10	96079429	96079626
chr10	96179860	96180062
chr10	96183103	96183283
chr10	96214241	96214605
chr10	96288939	96289132
chr10	96712820	96713195
chr10	96871858	96872132
chr10	97264277	97264574
chr10	97434338	97434493
chr10	97812118	97812282
chr10	97862569	97862802
chr10	98211892	98212266
chr10	98319924	98320453
chr10	98376865	98377045
chr10	98405705	98405959
chr10	98550667	98551090
chr10	98594697	98595241
chr10	98599356	98599572
chr10	98634696	98635064
chr10	98724056	98724639
chr10	98725448	98726054
chr10	98728055	98728274
chr10	98731643	98732043
chr10	98756090	98756294
chr10	98996185	98996531
chr10	99032885	99033311
chr10	99297471	99297889
chr10	99404440	99404630
chr10	99484712	99485039
chr10	99514105	99514311
chr10	99622961	99623146
chr10	100079947	100080124
chr10	100148496	100148676
chr10	101505224	101505404
chr10	101647351	101647561
chr10	104098804	104099016
chr10	104557334	104557732
chr10	104946208	104946546
chr10	105075981	105076587
chr10	105278383	105278549
chr10	107408790	107409131
chr10	107454855	107455021
chr10	107570151	107570338
chr10	107570716	107571181
chr10	108241430	108241678
chr10	108416687	108417069
chr10	108797352	108797506
chr10	109006896	109007203
chr10	109121670	109121925
chr10	109679188	109679368
chr10	109866789	109866992
chr10	109993624	109993804
chr10	110390271	110390459
chr10	110766291	110766656
chr10	110791741	110792038
chr10	110855622	110855829
chr10	110946476	110946941
chr10	110976974	110977175
chr10	111003810	111004219
chr10	111037734	111038219
chr10	111102892	111103560
chr10	111273385	111273627
chr10	111304677	111304994
chr10	111373667	111374229
chr10	111409580	111409831
chr10	111815601	111815765
chr10	112313764	112314064
chr10	113640123	113640303
chr10	114799228	114799408
chr10	114906077	114906589
chr10	115008389	115008686
chr10	115016591	115016924
chr10	115799179	115799710
chr10	115853424	115853708
chr10	115971488	115971702
chr10	116172742	116172937
chr10	116265252	116265550
chr10	116532014	116532378
chr10	117023960	117024203
chr10	117419858	117420066
chr10	117431926	117432114
chr10	117486323	117486705
chr10	117578595	117578785
chr10	118407515	118407735
chr10	118492308	118492678
chr10	118655175	118655462
chr10	118677085	118677304
chr10	118677522	118677702
chr10	118920915	118921107
chr10	118933237	118933629
chr10	119052429	119052682
chr10	119121416	119121841
chr10	119128768	119129157
chr10	119466460	119466657
chr10	119814354	119814947
chr10	119825515	119825838
chr10	119825953	119826166
chr10	119859162	119859426
chr10	119860094	119860380
chr10	119863359	119863657
chr10	120061344	120061696
chr10	120073295	120073541
chr10	120123180	120123517
chr10	120182230	120182522
chr10	120201001	120201556
chr10	120643033	120643743
chr10	120863885	120864065
chr10	120866208	120866448
chr10	120908876	120909079
chr10	120935679	120935856
chr10	120938299	120938496
chr10	120942070	120943049
chr10	121274007	121274206
chr10	121274602	121274987
chr10	121307116	121307373
chr10	121383244	121383546
chr10	121401309	121401499
chr10	122282711	122283182
chr10	122321025	122321784
chr10	122324639	122325120
chr10	122331675	122331872
chr10	122513398	122513636
chr10	122572972	122573171
chr10	122633986	122634268
chr10	122985533	122985783
chr10	123034263	123034449
chr10	123786315	123786701
chr10	124281192	124281412
chr10	124558858	124559208
chr10	124761265	124761495
chr10	125023984	125024133
chr10	125434162	125434506
chr10	125508452	125508731
chr10	125613876	125614201
chr10	126211443	126211676
chr10	126415543	126415776
chr10	126423688	126423950
chr10	126500323	126500504
chr10	126507151	126507428
chr10	126531397	126531988
chr10	126558112	126558350
chr10	126727452	126727883
chr10	126979263	126979518
chr10	127034397	127034672
chr10	127051303	127051799
chr10	127054447	127054651
chr10	127104767	127105019
chr10	127113957	127114188
chr10	127422757	127423043
chr10	127520162	127520367
chr10	127533731	127533973
chr10	127707386	127707610
chr10	127740236	127740467
chr10	127774571	127774880
chr10	127780611	127780824
chr10	127781917	127782216
chr10	127846778	127847072
chr10	127848542	127848769
chr10	127935742	127935935
chr10	127984806	127985023
chr10	128030139	128030337
chr10	128133226	128133857
chr10	128141996	128142245
chr10	128216168	128216358
chr10	128232742	128233000
chr10	128241422	128241671
chr10	128258591	128259090
chr10	128326285	128326477
chr10	128355395	128355685
chr11	3023876	3024060
chr11	3027340	3027526
chr11	3032018	3032251
chr11	3042987	3043193
chr11	3044111	3044294
chr11	3044961	3045278
chr11	3046064	3046303
chr11	3046817	3047020
chr11	3053214	3053398
chr11	3055247	3055460
chr11	3056614	3056809
chr11	3059879	3060200
chr11	3065411	3065898
chr11	3071408	3071688
chr11	3077157	3077413
chr11	3081837	3081972
chr11	3092980	3093252
chr11	3096490	3096827
chr11	3189540	3189720
chr11	3192716	3192896
chr11	3232225	3232641
chr11	3237681	3237960
chr11	3296662	3296817
chr11	3435040	3435347
chr11	3473243	3473573
chr11	3549035	3549439
chr11	3753604	3753823
chr11	3803097	3803316
chr11	3996738	3996920
chr11	4018242	4018462
chr11	4074553	4074991
chr11	4092777	4093166
chr11	4128560	4128922
chr11	4200769	4201009
chr11	4236255	4236435
chr11	4520666	4520956
chr11	4522457	4522933
chr11	4562166	4562533
chr11	4574612	4574877
chr11	4578774	4578942
chr11	4597102	4597282
chr11	4691655	4691887
chr11	4703027	4703462
chr11	4749507	4749728
chr11	4999212	4999568
chr11	5029173	5029521
chr11	5089382	5089972
chr11	5120801	5121026
chr11	5171814	5172122
chr11	5177636	5177816
chr11	5180952	5181332
chr11	5197180	5197522
chr11	5214892	5215252
chr11	5218041	5218317
chr11	5291307	5291634
chr11	5420636	5420971
chr11	5748829	5749000
chr11	5778086	5778402
chr11	5900293	5900914
chr11	5928937	5929095
chr11	5930684	5930917
chr11	5975676	5975856
chr11	6007694	6008104
chr11	6019335	6019607
chr11	6054424	6054681
chr11	6304845	6304974
chr11	6344434	6344802
chr11	6381671	6382137
chr11	6389368	6389598
chr11	6428654	6428850
chr11	6446316	6446499
chr11	7082483	7082681
chr11	7111153	7111451
chr11	7135126	7135519
chr11	7308972	7309163
chr11	7341416	7341650
chr11	7365557	7365984
chr11	7366307	7366780
chr11	7876017	7876237
chr11	8047826	8048500
chr11	8115715	8115937
chr11	8121734	8121950
chr11	8154116	8154409
chr11	8324432	8324911
chr11	8332230	8332453
chr11	8346092	8346453
chr11	8356571	8356897
chr11	8357855	8358323
chr11	8368499	8368762
chr11	8396767	8396948
chr11	8413526	8413784
chr11	8413913	8414234
chr11	8423589	8423929
chr11	8456973	8457321
chr11	8522721	8523008
chr11	8559876	8560243
chr11	8763912	8764188
chr11	8858629	8858809
chr11	8948420	8948642
chr11	9341159	9341414
chr11	10914172	10914390
chr11	10988290	10988533
chr11	11009272	11009592
chr11	12131485	12131753
chr11	16200848	16201007
chr11	16491469	16491858
chr11	16527639	16528146
chr11	16569876	16570230
chr11	16731896	16732492
chr11	16795443	16795844
chr11	16841444	16841762
chr11	16851174	16851395
chr11	17111477	17112000
chr11	17206117	17206387
chr11	17314671	17314813
chr11	17317787	17318160
chr11	17558221	17558445
chr11	17911480	17911660
chr11	18015611	18015976
chr11	18149389	18149601
chr11	18481389	18481911
chr11	18482465	18482721
chr11	18651044	18651242
chr11	18777670	18777853
chr11	18778102	18778287
chr11	18813294	18813586
chr11	18840971	18841308
chr11	18918898	18919152
chr11	19038488	19038714
chr11	19043347	19043907
chr11	19104078	19104315
chr11	19104704	19104982
chr11	19371121	19371301
chr11	19424060	19424535
chr11	19817455	19817753
chr11	19823968	19824265
chr11	20012961	20013127
chr11	20101149	20101447
chr11	20131191	20131493
chr11	20149402	20149712
chr11	20232782	20233078
chr11	20247508	20247919
chr11	20296137	20296433
chr11	20300714	20301112
chr11	20360550	20360696
chr11	20377278	20377966
chr11	20442751	20443205
chr11	20503169	20503371
chr11	20516122	20516313
chr11	20540260	20540388
chr11	20555828	20556059
chr11	20633572	20633757
chr11	20759130	20759448
chr11	20815065	20815651
chr11	20821991	20822216
chr11	20823196	20823613
chr11	20841524	20841929
chr11	20936209	20936418
chr11	20990943	20991224
chr11	21061760	21062036
chr11	21265155	21265335
chr11	21271208	21271414
chr11	21471762	21472032
chr11	21885202	21885382
chr11	21901550	21901893
chr11	21908350	21908536
chr11	21917540	21917735
chr11	22186972	22187472
chr11	22248610	22248949
chr11	22272671	22273066
chr11	22484286	22485049
chr11	22487663	22488218
chr11	22502014	22502247
chr11	22544112	22544302
chr11	22773434	22773927
chr11	22823683	22823931
chr11	22864573	22864761
chr11	23040839	23041027
chr11	23155550	23156024
chr11	23397974	23398186
chr11	23565870	23566066
chr11	23756796	23757027
chr11	24062233	24062448
chr11	24208023	24208225
chr11	24215940	24216463
chr11	25000016	25000206
chr11	28265526	28265716
chr11	29072674	29073037
chr11	29147149	29147488
chr11	29328860	29329094
chr11	29522454	29522691
chr11	29536756	29537211
chr11	29592702	29593008
chr11	29644872	29645105
chr11	29688875	29689088
chr11	29739881	29740064
chr11	30061100	30061521
chr11	30143522	30144022
chr11	30267452	30267686
chr11	30572706	30573008
chr11	31095705	31095889
chr11	31613595	31614013
chr11	31630199	31630509
chr11	31634134	31634536
chr11	31668251	31668543
chr11	31707469	31707953
chr11	31730269	31730525
chr11	31738332	31738896
chr11	31739177	31739415
chr11	31746902	31747468
chr11	31807789	31807969
chr11	31841417	31841616
chr11	31987711	31987896
chr11	32013147	32013367
chr11	32019272	32019517
chr11	32057738	32058580
chr11	32105223	32105426
chr11	32124558	32125164
chr11	32135650	32136036
chr11	32136312	32136504
chr11	32144162	32144479
chr11	32230899	32231504
chr11	32231945	32232231
chr11	32257740	32258055
chr11	32263645	32264025
chr11	32283721	32284205
chr11	32344349	32344529
chr11	32436962	32437239
chr11	32465726	32465968
chr11	32467281	32467786
chr11	32489857	32490102
chr11	32519421	32519664
chr11	32680995	32681485
chr11	32681595	32682081
chr11	32700931	32701388
chr11	32764709	32764889
chr11	32846486	32846804
chr11	32970668	32970932
chr11	32975340	32975680
chr11	33749651	33749844
chr11	33851133	33851409
chr11	34013055	34013269
chr11	34081592	34081820
chr11	34647065	34647332
chr11	35400786	35400985
chr11	35582773	35583069
chr11	35670218	35670479
chr11	35702319	35702633
chr11	35706495	35706891
chr11	35740698	35741199
chr11	35746963	35747681
chr11	35789908	35790369
chr11	35909932	35910106
chr11	35922943	35923348
chr11	36034097	36034341
chr11	36510559	36510988
chr11	37549532	37549893
chr11	37984248	37984512
chr11	40507071	40507278
chr11	40547009	40547189
chr11	40568692	40568989
chr11	42181471	42181695
chr11	42568449	42568629
chr11	42795746	42795992
chr11	43198527	43198791
chr11	43199266	43199593
chr11	43333881	43334210
chr11	43361669	43361964
chr11	43383126	43383613
chr11	43456654	43457052
chr11	43495220	43495539
chr11	43609546	43609946
chr11	43645151	43645521
chr11	43690786	43691081
chr11	43803555	43803721
chr11	43816295	43816508
chr11	43917346	43917576
chr11	44219088	44219277
chr11	44333657	44334060
chr11	44510439	44510672
chr11	44553876	44554132
chr11	44901054	44901314
chr11	45483979	45484257
chr11	45580756	45580941
chr11	45695350	45695560
chr11	45839396	45839944
chr11	45878280	45878475
chr11	45878791	45879604
chr11	45882279	45882470
chr11	45898211	45898391
chr11	49057565	49057753
chr11	49526163	49526457
chr11	49578008	49578499
chr11	49744463	49744838
chr11	49747728	49747929
chr11	49752139	49752505
chr11	49841959	49842181
chr11	50139099	50139396
chr11	50445995	50446172
chr11	51420306	51420542
chr11	51460841	51461034
chr11	51636794	51637083
chr11	51645922	51646327
chr11	51665847	51666033
chr11	51756613	51756917
chr11	51813848	51814350
chr11	51899587	51900420
chr11	52100124	52100332
chr11	52147247	52147427
chr11	52151364	52151629
chr11	52245128	52245606
chr11	52732699	52732967
chr11	52733325	52733558
chr11	53244460	53244667
chr11	53282822	53283128
chr11	53305482	53305802
chr11	53309113	53309396
chr11	53320772	53320938
chr11	53321658	53321947
chr11	53505642	53505827
chr11	53920760	53921096
chr11	53935866	53936242
chr11	53969503	53969711
chr11	54251456	54251755
chr11	54537923	54538146
chr11	54565108	54565298
chr11	54567752	54568324
chr11	54592002	54592227
chr11	54626334	54626570
chr11	54674014	54674283
chr11	54685801	54686100
chr11	54694520	54694977
chr11	54828744	54829700
chr11	54836436	54836984
chr11	54845243	54845727
chr11	54889120	54889369
chr11	55075739	55075951
chr11	55237285	55237744
chr11	55241799	55242018
chr11	55282700	55283252
chr11	57366553	57366732
chr11	57411739	57412189
chr11	57414131	57414511
chr11	57435422	57435602
chr11	57458559	57459021
chr11	57470228	57470565
chr11	57510351	57510607
chr11	57515005	57515356
chr11	57525494	57525796
chr11	57534356	57534688
chr11	57587186	57587416
chr11	57664422	57664701
chr11	57930724	57931035
chr11	58136746	58136968
chr11	58660498	58660678
chr11	58717661	58717841
chr11	58767943	58768142
chr11	59126072	59126344
chr11	59272492	59272848
chr11	59443457	59443794
chr11	59475780	59476023
chr11	59572717	59573058
chr11	59584252	59584641
chr11	59623038	59623851
chr11	59652803	59653140
chr11	59995793	59996040
chr11	60022841	60023048
chr11	60086734	60087215
chr11	60107887	60108325
chr11	60117134	60117331
chr11	60124949	60125490
chr11	60166342	60166843
chr11	60230487	60230791
chr11	60513088	60513254
chr11	60517429	60517617
chr11	60541742	60541954
chr11	60590760	60591174
chr11	60624690	60624864
chr11	60745365	60745567
chr11	60819834	60820018
chr11	60838633	60838882
chr11	60873148	60873578
chr11	60988457	60988972
chr11	61300929	61301271
chr11	61308002	61308191
chr11	61342327	61343261
chr11	61346930	61347441
chr11	61350886	61351282
chr11	61839944	61840292
chr11	61860545	61860779
chr11	61882919	61883428
chr11	61920135	61920423
chr11	62005624	62006039
chr11	62077142	62077494
chr11	62364896	62365103
chr11	62416144	62416460
chr11	62633735	62633991
chr11	62780165	62780562
chr11	62780646	62781089
chr11	62797407	62797648
chr11	62939677	62939923
chr11	62944092	62944417
chr11	62946431	62946639
chr11	62948572	62948737
chr11	63268768	63268958
chr11	64440739	64441060
chr11	64528775	64529015
chr11	64792396	64792593
chr11	65620512	65620779
chr11	66814204	66814598
chr11	66831255	66831617
chr11	67276079	67276259
chr11	67315424	67315682
chr11	67332469	67332996
chr11	67363006	67363210
chr11	67399634	67400325
chr11	67402075	67402872
chr11	67405543	67405734
chr11	67409718	67410047
chr11	67456446	67456731
chr11	67844258	67844763
chr11	67864323	67864575
chr11	68002286	68002468
chr11	68009279	68009539
chr11	68013033	68013643
chr11	68019416	68019641
chr11	68028552	68029139
chr11	68393131	68393422
chr11	68505192	68505668
chr11	68532574	68532966
chr11	68800925	68801096
chr11	68873015	68873264
chr11	68886634	68886832
chr11	68908360	68908767
chr11	68910564	68910730
chr11	69137244	69137502
chr11	69175604	69175833
chr11	69178410	69178865
chr11	69179778	69180123
chr11	69196020	69196321
chr11	69209489	69209760
chr11	69222143	69222439
chr11	69222947	69223134
chr11	69224698	69224949
chr11	69228764	69229112
chr11	69229550	69229821
chr11	69231422	69231751
chr11	69256826	69257200
chr11	69394876	69395148
chr11	69413678	69413877
chr11	69484733	69485122
chr11	69485749	69486072
chr11	69499046	69499613
chr11	69572089	69572436
chr11	69613665	69613864
chr11	69651708	69652113
chr11	69694447	69694718
chr11	69705061	69705302
chr11	69804423	69804646
chr11	69808978	69809239
chr11	69813887	69814067
chr11	69833542	69833722
chr11	69834861	69835161
chr11	69842615	69842871
[truncated: 12,223 more rows]

## Sheet: SOX21
chr1	5013045	5013243
chr1	9560382	9560635
chr1	9617631	9617979
chr1	9620211	9620598
chr1	9639323	9639585
chr1	12634704	12635071
chr1	13926212	13926393
chr1	14170520	14170708
chr1	16202619	16202852
chr1	20857499	20857866
chr1	21795148	21795389
chr1	24233116	24233296
chr1	24237347	24237527
chr1	25949289	25949512
chr1	33099345	33099628
chr1	34207639	34207938
chr1	34224162	34224366
chr1	34640721	34640961
chr1	34722058	34722326
chr1	34723224	34723444
chr1	35868381	35868568
chr1	36366399	36366632
chr1	36663994	36664206
chr1	36693357	36693664
chr1	36977024	36977214
chr1	37179225	37179389
chr1	38391142	38391333
chr1	38507625	38507848
chr1	39770895	39771282
chr1	39791251	39791481
chr1	39792776	39792910
chr1	39862578	39862758
chr1	39895628	39895981
chr1	39998776	39998982
chr1	40004747	40004916
chr1	40174459	40174621
chr1	41084406	41084795
chr1	41447022	41447363
chr1	41662693	41662857
chr1	42595587	42595694
chr1	43374001	43374462
chr1	43751654	43752053
chr1	43755366	43755684
chr1	43787403	43787586
chr1	44648610	44648876
chr1	50954649	50954829
chr1	51347592	51347808
chr1	51936365	51936542
chr1	52053565	52054062
chr1	53880751	53880932
chr1	53886028	53886269
chr1	54307377	54307578
chr1	54541811	54542114
chr1	55546254	55546516
chr1	56890183	56890495
chr1	57846686	57847127
chr1	57947177	57947411
chr1	58087310	58087709
chr1	59782500	59782688
chr1	59890638	59890818
chr1	61291185	61291401
chr1	61959540	61959822
chr1	62228390	62228616
chr1	63810620	63810806
chr1	63875114	63875364
chr1	64067363	64067543
chr1	64168756	64168981
chr1	64189332	64189560
chr1	64220409	64220589
chr1	64236105	64236348
chr1	64242652	64242893
chr1	64900326	64900461
chr1	66241977	66242171
chr1	66274891	66275107
chr1	66616374	66616556
chr1	66736013	66736186
chr1	67444468	67444649
chr1	72301760	72301942
chr1	72766932	72767184
chr1	72786318	72786499
chr1	72876578	72876914
chr1	73317266	73317869
chr1	73689358	73689618
chr1	74045261	74045536
chr1	74157990	74158260
chr1	74342326	74342496
chr1	74589068	74589250
chr1	78757918	78758139
chr1	79694054	79694253
chr1	80633801	80634095
chr1	80850947	80851299
chr1	82147452	82147673
chr1	82473403	82473580
chr1	83903588	83903801
chr1	87813594	87813837
chr1	87824941	87825121
chr1	87928928	87929384
chr1	88405988	88406275
chr1	88423071	88423251
chr1	88552620	88552837
chr1	89210533	89210713
chr1	89682463	89682576
chr1	89682896	89683245
chr1	89788301	89788572
chr1	89826493	89826673
chr1	90374742	90375216
chr1	90520190	90520441
chr1	90554801	90555356
chr1	90604286	90604498
chr1	90706231	90706490
chr1	90736745	90737011
chr1	90820804	90821190
chr1	91297293	91297723
chr1	91321285	91321479
chr1	91406707	91406895
chr1	91414461	91414754
chr1	92124969	92125212
chr1	92187500	92187783
chr1	92864225	92864537
chr1	92871586	92871818
chr1	92935236	92935561
chr1	92952386	92952566
chr1	93073526	93073762
chr1	93105961	93106286
chr1	93106450	93106638
chr1	93310706	93310968
chr1	93800227	93800483
chr1	93996203	93996463
chr1	94033814	94034089
chr1	94108644	94108974
chr1	94112682	94112869
chr1	94830922	94831128
chr1	96400394	96400721
chr1	99437352	99437658
chr1	99450325	99450804
chr1	106643418	106643788
chr1	106734795	106735018
chr1	108051937	108052256
chr1	108068008	108068188
chr1	108096271	108096577
chr1	108098570	108098934
chr1	108137707	108137980
chr1	108213571	108213759
chr1	108324845	108325081
chr1	109999066	109999315
chr1	115254830	115255206
chr1	115936095	115936266
chr1	120873391	120873629
chr1	120930340	120930716
chr1	121152044	121152537
chr1	121225645	121225824
chr1	121350340	121350578
chr1	122012139	122012611
chr1	122981905	122982127
chr1	122983800	122984002
chr1	123008612	123008784
chr1	123073810	123074054
chr1	127536174	127536372
chr1	128552942	128553224
chr1	128580564	128580969
chr1	128762197	128762396
chr1	128821752	128822036
chr1	129136572	129136759
chr1	129245181	129245416
chr1	129265174	129265477
chr1	130301563	130302034
chr1	132975444	132975741
chr1	133328446	133328754
chr1	133370126	133370589
chr1	133648633	133648838
chr1	133667312	133667491
chr1	134118791	134119083
chr1	134230407	134230592
chr1	135164635	135164811
chr1	135294413	135294555
chr1	135885643	135885841
chr1	135960060	135960240
chr1	135992981	135993296
chr1	136129752	136129807
chr1	136755338	136755518
chr1	137055777	137055996
chr1	137410065	137410271
chr1	137411862	137412097
chr1	137454840	137455014
chr1	137464765	137464926
chr1	137583448	137583717
chr1	137631314	137631563
chr1	137637664	137637973
chr1	139487890	139488148
chr1	139824612	139824777
chr1	139926322	139926545
chr1	140222840	140223087
chr1	141243209	141243612
chr1	143000636	143000822
chr1	144976961	144977141
chr1	148691306	148691507
chr1	152606682	152606955
chr1	152737190	152737350
chr1	154012657	154012960
chr1	154287123	154287305
chr1	154403403	154403583
chr1	154439933	154440139
chr1	154640011	154640197
chr1	154861608	154861866
chr1	154931324	154931702
chr1	155039169	155039349
chr1	155049389	155049610
chr1	155156074	155156375
chr1	155353372	155353769
chr1	155550575	155551033
chr1	155949961	155950414
chr1	155997351	155997710
chr1	156830201	156830723
chr1	156910135	156910381
chr1	157059722	157060013
chr1	157081184	157081701
chr1	158684739	158685017
chr1	158927641	158927949
chr1	158928127	158928416
chr1	159356239	159356420
chr1	159758155	159758317
chr1	160312595	160312775
chr1	160419800	160420127
chr1	161343373	161343881
chr1	161424470	161424677
chr1	161600911	161601319
chr1	161671947	161672229
chr1	161795848	161796094
chr1	162461596	162461822
chr1	164127153	164127405
chr1	164762344	164762605
chr1	165570765	165571100
chr1	167519476	167519677
chr1	167865182	167865464
chr1	167896724	167896908
chr1	168212741	168212921
chr1	168331660	168331821
chr1	168332245	168332425
chr1	169170073	169170528
chr1	169200228	169200408
chr1	169976584	169976952
chr1	170981613	170981840
chr1	171023725	171023986
chr1	171398033	171398287
chr1	171414879	171415077
chr1	171415659	171416026
chr1	172354752	172355082
chr1	172451760	172451984
chr1	172585701	172585941
chr1	172635242	172635550
chr1	173488282	173488462
chr1	174029718	174029925
chr1	174062405	174062694
chr1	174272890	174273087
chr1	174280026	174280422
chr1	179080523	179080890
chr1	179105586	179105886
chr1	179374644	179374840
chr1	179377751	179377985
chr1	179485947	179486127
chr1	179553438	179553810
chr1	182320654	182320936
chr1	182778770	182779141
chr1	183414863	183415043
chr1	183983187	183983497
chr1	184033556	184034012
chr1	184044171	184044300
chr1	184046243	184046479
chr1	184405295	184405467
chr1	184848996	184849310
chr1	185607667	185607932
chr1	186264990	186265168
chr1	186272772	186273278
chr1	186277594	186278017
chr1	187025029	187025209
chr1	188479094	188479372
chr1	189942113	189942290
chr1	190839435	190839615
chr1	191011540	191012073
chr1	191468884	191469077
chr1	191469316	191469522
chr1	191961956	191962136
chr1	192306992	192307158
chr1	192506170	192506583
chr1	192551951	192552194
chr1	193078453	193078648
chr1	193319199	193319379
chr1	193632536	193632866
chr1	194660932	194661180
chr1	194977449	194977619
chr1	195164602	195164847
chr1	195212489	195212737
chr1	195578190	195578467
chr1	195845571	195845801
chr1	196034389	196034613
chr1	196455366	196455876
chr1	196565986	196566431
chr1	196569175	196569533
chr1	196573179	196573373
chr1	196634637	196634822
chr1	196804386	196804605
chr1	197067691	197067981
chr10	3234659	3234835
chr10	4338639	4338819
chr10	6238549	6238730
chr10	6240465	6240679
chr10	6367086	6367367
chr10	6649332	6649513
chr10	6650844	6651006
chr10	7302050	7302341
chr10	7324976	7325372
chr10	7896521	7896748
chr10	10994345	10994582
chr10	13434417	13434815
chr10	13636868	13637048
chr10	14052527	14052954
chr10	14202334	14202563
chr10	19029930	19030146
chr10	19283372	19283636
chr10	21308424	21308660
chr10	21356569	21356791
chr10	21398920	21399277
chr10	21421447	21421704
chr10	21549256	21549488
chr10	21643358	21643571
chr10	22329000	22329180
chr10	22466241	22466452
chr10	23394531	23394922
chr10	24037008	24037222
chr10	24157050	24157279
chr10	24743481	24743864
chr10	25091917	25092195
chr10	25206247	25206500
chr10	25728865	25729125
chr10	26280393	26280564
chr10	30347390	30347570
chr10	30893162	30893402
chr10	30972992	30973157
chr10	31015661	31015852
chr10	31197637	31197854
chr10	31223936	31224307
chr10	31312650	31312830
chr10	32589434	32589715
chr10	32601841	32602069
chr10	32899580	32899760
chr10	32899888	32900333
chr10	32915882	32916062
chr10	33991574	33991930
chr10	36287141	36287322
chr10	36798345	36798585
chr10	36860556	36860794
chr10	36970653	36971337
chr10	37097863	37098043
chr10	37117134	37117333
chr10	37386937	37387163
chr10	37411792	37411972
chr10	37532343	37532693
chr10	38273441	38273829
chr10	39010927	39011162
chr10	39011704	39011912
chr10	39041081	39041289
chr10	39254259	39254829
chr10	39260777	39261112
chr10	39261889	39262088
chr10	39365724	39365935
chr10	39366416	39366716
chr10	39379270	39380196
chr10	39392285	39392805
chr10	39394636	39394897
chr10	40219670	40219953
chr10	40239535	40239780
chr10	41654586	41654842
chr10	41791252	41791424
chr10	41812402	41812605
chr10	42614191	42614401
chr10	42763261	42763621
chr10	42996088	42996456
chr10	43471743	43472156
chr10	43838462	43838653
chr10	44325052	44325293
chr10	44717315	44717592
chr10	44729483	44729768
chr10	44823131	44823311
chr10	46417785	46418128
chr10	46822406	46822838
chr10	47084986	47085247
chr10	52462492	52462932
chr10	53257434	53257736
chr10	56655060	56655245
chr10	57291976	57292213
chr10	57427850	57428016
chr10	57542340	57542625
chr10	57548434	57548847
chr10	58063754	58064104
chr10	58064356	58064535
chr10	58369819	58370057
chr10	58391853	58392024
chr10	58412686	58413042
chr10	58933346	58933521
chr10	59249033	59249443
chr10	59353175	59353375
chr10	59421346	59421526
chr10	59657895	59658075
chr10	59665722	59665815
chr10	59853419	59853622
chr10	60270639	60270864
chr10	60740683	60741113
chr10	60843017	60843343
chr10	60851870	60852216
chr10	61657256	61657572
chr10	61783307	61783491
chr10	62202878	62203060
chr10	62328098	62328325
chr10	63343138	63343446
chr10	66383200	66383433
chr10	66384021	66384450
chr10	66481650	66481823
chr10	66524169	66524462
chr10	66750780	66750993
chr10	67428740	67429268
chr10	67674872	67675112
chr10	68258276	68258483
chr10	69074849	69075014
chr10	69657818	69658120
chr10	70269630	70269979
chr10	70290979	70291368
chr10	70412347	70412578
chr10	72954501	72954708
chr10	73576902	73577172
chr10	74415571	74415779
chr10	74561284	74561457
chr10	74569694	74569958
chr10	74928861	74929041
chr10	75167182	75167383
chr10	75406866	75407221
chr10	75713669	75713849
chr10	75826112	75826297
chr10	76586702	76587018
chr10	76692398	76692511
chr10	77086003	77086225
chr10	77097577	77097733
chr10	77768782	77769119
chr10	79069333	79069537
chr10	79266626	79266876
chr10	79321230	79321410
chr10	79363760	79364170
chr10	79395555	79395790
chr10	79396997	79397301
chr10	79498008	79498204
chr10	79511158	79511535
chr10	79581293	79581598
chr10	79612206	79612421
chr10	79850370	79850621
chr10	80319062	80319259
chr10	80320101	80320314
chr10	80617584	80617763
chr10	80637803	80637992
chr10	81060242	81060617
chr10	82494424	82494604
chr10	82596818	82597015
chr10	82605823	82606101
chr10	82708491	82708696
chr10	83523539	83523816
chr10	83820847	83821017
chr10	84148699	84148934
chr10	84173641	84173927
chr10	84218654	84218914
chr10	84426538	84426730
chr10	85416255	85416435
chr10	85838661	85839111
chr10	85920076	85920255
chr10	85920507	85920686
chr10	86282587	86282895
chr10	86910573	86910787
chr10	87389967	87390301
chr10	89843549	89843993
chr10	89945681	89945924
chr10	89957583	89958000
chr10	91054107	91054285
chr10	91182334	91183082
chr10	91499098	91499280
chr10	91544049	91544287
chr10	92718097	92718425
chr10	92738121	92738560
chr10	92739228	92739446
chr10	93199076	93199335
chr10	93234618	93235041
chr10	93246464	93246785
chr10	93592428	93592768
chr10	93635549	93635763
chr10	93693472	93693753
chr10	94031009	94031170
chr10	94292286	94292481
chr10	94498114	94498511
chr10	94605785	94605985
chr10	94662237	94662518
chr10	95280389	95280742
chr10	95653170	95653537
chr10	95771510	95772061
chr10	96079394	96079602
chr10	96712907	96713119
chr10	96871935	96872193
chr10	97264220	97264427
chr10	97862544	97862803
chr10	98211983	98212175
chr10	98319944	98320496
chr10	98550776	98551036
chr10	98594740	98595251
chr10	98725527	98725742
chr10	98728083	98728308
chr10	99297618	99297878
chr10	99404447	99404609
chr10	99484783	99485024
chr10	105076008	105076572
chr10	107408835	107409106
chr10	107570853	107571196
chr10	108416824	108417015
chr10	110766325	110766563
chr10	110791766	110791950
chr10	110855620	110855835
chr10	110946602	110946863
chr10	111003984	111004214
chr10	111038064	111038289
chr10	111102976	111103331
chr10	111273327	111273583
chr10	111304709	111304942
chr10	111373679	111373871
chr10	113640111	113640327
chr10	114906111	114906501
chr10	115008447	115008645
chr10	115799298	115799574
chr10	116265281	116265522
chr10	116532075	116532299
chr10	118492398	118492650
chr10	118920906	118921086
chr10	118933330	118933509
chr10	119121456	119121784
chr10	119128863	119129087
chr10	119814533	119814886
chr10	120061454	120061648
chr10	120123170	120123415
chr10	120182301	120182475
chr10	120643064	120643668
chr10	120935635	120935864
chr10	120938191	120938496
chr10	120942113	120942591
chr10	120942782	120943019
chr10	122282772	122283177
chr10	122321137	122321522
chr10	122324684	122325148
chr10	123015007	123015187
chr10	123786356	123786689
chr10	124558899	124559196
chr10	125434125	125434485
chr10	125613861	125614113
chr10	126211445	126211685
chr10	127051338	127051572
chr10	127759343	127759537
chr10	127878813	127879000
chr11	3032038	3032285
chr11	3042982	3043189
chr11	3044053	3044233
chr11	3044612	3045266
chr11	3046073	3046285
chr11	3046806	3047029
chr11	3047528	3047706
chr11	3051394	3051583
chr11	3057823	3058003
chr11	3061096	3061327
chr11	3062225	3062417
chr11	3065374	3065828
chr11	3077125	3077452
chr11	3079622	3079813
chr11	3081809	3082030
chr11	3084910	3085127
chr11	3085320	3085502
chr11	3092785	3093323
chr11	3096569	3096759
chr11	3473287	3473461
chr11	4074682	4074987
chr11	4092916	4093133
chr11	4522479	4522866
chr11	4562256	4562449
chr11	4625721	4625882
chr11	4703077	4703355
chr11	4749514	4749710
chr11	5029274	5029487
chr11	5089406	5089962
chr11	5120742	5120972
chr11	5181016	5181254
chr11	5197294	5197482
chr11	5291329	5291568
chr11	5748791	5749032
chr11	5900368	5900677
chr11	5928899	5929079
chr11	6007802	6008000
chr11	6381752	6382064
chr11	7060794	7061060
chr11	7111298	7111474
chr11	7365666	7365870
chr11	7366434	7366727
chr11	7876030	7876260
chr11	8047919	8048125
chr11	8154176	8154417
chr11	8346128	8346395
chr11	8423679	8423762
chr11	8457060	8457296
chr11	10988232	10988565
chr11	12284878	12285081
chr11	12330176	12330442
chr11	16491659	16491844
chr11	16527681	16528080
chr11	16569924	16570233
chr11	16731827	16732395
chr11	16795483	16795693
chr11	16841395	16841723
chr11	18015761	18015960
chr11	18481593	18481810
chr11	18482512	18482692
chr11	18841016	18841190
chr11	18918880	18919109
chr11	18974240	18974445
chr11	19424081	19424400
chr11	19817490	19817690
chr11	19824087	19824337
chr11	20131210	20131565
chr11	20233151	20233390
chr11	20247610	20247795
chr11	20377399	20377704
chr11	20815262	20815566
chr11	20823258	20823558
chr11	20841570	20841929
chr11	22248600	22248967
chr11	22484347	22484942
chr11	22823677	22823868
chr11	25000012	25000339
chr11	25492274	25492523
chr11	29536823	29537154
chr11	30061144	30061494
chr11	30572834	30572987
chr11	30573226	30573432
chr11	31634188	31634392
chr11	31738332	31738855
chr11	31746968	31747428
chr11	32013117	32013367
chr11	32135667	32135976
chr11	32144229	32144538
chr11	32231167	32231420
chr11	32231952	32232191
chr11	32283747	32284205
chr11	32436954	32437274
chr11	32467406	32467735
chr11	32519429	32519654
chr11	32681078	32681379
chr11	32681705	32681885
chr11	32701166	32701264
chr11	34081590	34081752
chr11	35670266	35670433
chr11	35702307	35702653
chr11	35740763	35741108
chr11	35746946	35747573
chr11	35790160	35790386
chr11	35922953	35923382
chr11	36034002	36034309
chr11	36510688	36510856
chr11	37549632	37549854
chr11	37950206	37950397
chr11	37984288	37984489
chr11	43104642	43104840
chr11	43333933	43334137
chr11	43361673	43362000
chr11	43382961	43383175
chr11	43456760	43456914
chr11	43609559	43609772
chr11	44470486	44470666
chr11	44655276	44655407
chr11	44900769	44900937
chr11	45268422	45268744
chr11	45839650	45839956
chr11	45879110	45879402
chr11	49578104	49578392
chr11	49744524	49744827
chr11	49752205	49752453
chr11	51899914	51900072
chr11	52100011	52100334
chr11	52245217	52245481
chr11	52732705	52732910
chr11	53032053	53032260
chr11	53321658	53321937
chr11	53920740	53921001
chr11	53935829	53936219
chr11	54567816	54568222
chr11	54626263	54626591
chr11	54694522	54694886
chr11	54828782	54829161
chr11	54845353	54845638
chr11	54892851	54893040
chr11	55237357	55237623
chr11	57345110	57345281
chr11	57414300	57414413
chr11	57470257	57470437
chr11	57510368	57510633
chr11	57930734	57931010
chr11	59443514	59443698
chr11	59475789	59476017
chr11	59995847	59996051
chr11	60107890	60108316
chr11	60590772	60591057
chr11	60601310	60601513
chr11	61231568	61231748
chr11	61301037	61301218
chr11	61342461	61343166
chr11	61347152	61347410
chr11	61837672	61837859
chr11	62780745	62780925
chr11	62946426	62946625
chr11	63268787	63268994
chr11	63766211	63766467
chr11	64528788	64528964
chr11	66814240	66814562
chr11	66831271	66831594
chr11	67276107	67276344
chr11	67332650	67332840
chr11	67399776	67400228
chr11	67402238	67402822
chr11	67844409	67844610
chr11	68013178	68013551
chr11	68028728	68028990
chr11	68532545	68532906
chr11	69178400	69178835
chr11	69228818	69229062
chr11	69231484	69231680
chr11	69499167	69499501
chr11	70053524	70053712
chr11	71395366	71395625
chr11	71572017	71572368
chr11	71576706	71576991
chr11	71583293	71583632
chr11	71584020	71584334
chr11	71900293	71900473
chr11	72039607	72039787
chr11	72207195	72207467
chr11	72336237	72336458
chr11	72765804	72765990
chr11	72767315	72767625
chr11	72828654	72828846
chr11	74970703	74970883
chr11	75073806	75073991
chr11	75961664	75961888
chr11	76081700	76081880
chr11	76103915	76104148
chr11	76460631	76461091
chr11	76663129	76663470
chr11	76686415	76686595
chr11	76703597	76703805
chr11	76987321	76987522
chr11	77642883	77643177
chr11	77707225	77707818
chr11	77715363	77715644
chr11	77965840	77966152
chr11	77976083	77976263
chr11	77977462	77977711
chr11	78011416	78011655
chr11	78029419	78029640
chr11	78137541	78137793
chr11	78700645	78700906
chr11	78909410	78909599
chr11	79080814	79081044
chr11	79093605	79093881
chr11	79429189	79429381
chr11	79460058	79460257
chr11	79460360	79460538
chr11	79543115	79543443
chr11	79552350	79552505
chr11	79591577	79591757
chr11	79606175	79606489
chr11	80149209	80149542
chr11	80317618	80317835
chr11	83085330	83085511
chr11	83254855	83255045
chr11	83280737	83280917
chr11	83857089	83857295
chr11	84343857	84344032
chr11	84594054	84594283
chr11	85391504	85391857
chr11	85492189	85492485
chr11	87236544	87236735
chr11	87338325	87338496
chr11	87356395	87356725
chr11	87642080	87642260
chr11	87932800	87933191
chr11	87955894	87956207
chr11	87974795	87975031
chr11	87986582	87986765
chr11	88206320	88206624
chr11	88220253	88220434
chr11	88285442	88285879
chr11	88356408	88356805
chr11	88396743	88397105
chr11	88466518	88466629
chr11	93502387	93502576
chr11	93689945	93690185
chr11	93690532	93690864
chr11	93905468	93905759
chr11	93906438	93906628
chr11	93998946	93999182
chr11	94021757	94022132
chr11	94094836	94095100
chr11	94813589	94813834
chr11	94963759	94964019
chr11	95253485	95253985
chr11	95673673	95673869
chr11	96624413	96624697
chr11	97211523	97211778
chr11	97404776	97405010
chr11	97437926	97438131
chr11	97556183	97556469
chr11	97793620	97793882
chr11	98222255	98222493
chr11	98569426	98569578
chr11	98612293	98612473
chr11	98980415	98980818
chr11	100251261	100251528
chr11	100252371	100252805
chr11	100808088	100808467
chr11	101413867	101414164
chr11	101619737	101620065
chr11	101693357	101693623
chr11	102069549	102069731
chr11	102196371	102196589
chr11	102672502	102672737
chr11	102759732	102760133
chr11	103702240	103702532
chr11	104499417	104499633
chr11	105226170	105226366
chr11	107274692	107274986
chr11	107277992	107278211
chr11	107374363	107374631
chr11	107737156	107737713
chr11	107765320	107765554
chr11	107826835	107827019
chr11	108011796	108012115
chr11	108042403	108042755
chr11	108819675	108819987
chr11	108873128	108873408
chr11	108894026	108894543
chr11	109509761	109510178
chr11	109764019	109764199
chr11	110309451	110309597
chr11	110340276	110340570
chr11	111627877	111628309
chr11	111679477	111679891
chr11	111755342	111755535
chr11	111916184	111916340
chr11	112363131	112363519
chr11	112368267	112368513
chr11	112672950	112673172
chr11	112705837	112706072
chr11	113005226	113005574
chr11	113045521	113045632
chr11	113049618	113049851
chr11	113473256	113473459
chr11	113571442	113571620
chr11	114310190	114310406
chr11	114329222	114329419
chr11	114458541	114458731
chr11	114565395	114566041
chr11	114656513	114656833
chr11	114657291	114657510
chr11	114684091	114684374
chr11	115088460	115088695
chr11	115640449	115640936
chr11	115760386	115760565
chr11	116080065	116080398
chr11	116331251	116331536
chr11	116522688	116522886
chr11	117158090	117158378
chr11	117178038	117178325
chr11	117202572	117202894
chr11	117206494	117207046
chr11	117271341	117271736
chr11	117333018	117333418
chr11	117340300	117340578
chr11	117489539	117489799
chr11	117641014	117641237
chr11	117800986	117801283
chr11	117803212	117803405
chr11	118059347	118059906
chr11	118073061	118073462
chr11	118300130	118300563
chr11	119383624	119383885
chr11	119384107	119384414
chr11	119628180	119628551
chr11	119646237	119646482
chr11	119679358	119679587
chr11	119695689	119695891
chr11	120051264	120051493
chr11	120085240	120085630
chr11	120092775	120092995
chr11	120118469	120118720
chr11	120122848	120123018
chr11	120123391	120123780
chr11	121098409	121098589
chr12	3371052	3371232
chr12	3372126	3372306
chr12	3386299	3386512
chr12	3518955	3519135
chr12	3780485	3780665
chr12	4417723	4417912
chr12	5220299	5220589
chr12	5260062	5260425
chr12	5262072	5262264
chr12	8364373	8364553
chr12	8371165	8371402
chr12	8481699	8482012
chr12	8891296	8891476
chr12	8928352	8928606
chr12	9139496	9139700
chr12	9235375	9235707
chr12	9345843	9346135
chr12	9864732	9865032
chr12	10469857	10470059
chr12	12232595	12232843
chr12	12321975	12322218
chr12	12817057	12817237
chr12	12884602	12884794
chr12	12911464	12911760
chr12	13136608	13136882
chr12	13166499	13166678
chr12	14095951	14096137
chr12	15738112	15738308
chr12	15818596	15818808
chr12	16163021	16163305
chr12	16539283	16539550
chr12	16575901	16576226
chr12	16625770	16625972
chr12	17246121	17246447
chr12	17367612	17367812
chr12	17564617	17565139
chr12	17632911	17633198
chr12	17753627	17753849
chr12	17777525	17777741
chr12	21142227	21142509
chr12	21210561	21210753
chr12	21511901	21512080
chr12	25327170	25327586
chr12	25439591	25439928
chr12	25578993	25579335
chr12	25718908	25719211
chr12	25862637	25863015
chr12	26238625	26238890
chr12	26555895	26556359
chr12	26752939	26753455
chr12	26797322	26797915
chr12	26830130	26830450
chr12	27036278	27036478
chr12	27227542	27227742
chr12	27562609	27562807
chr12	27588425	27588633
chr12	27749876	27750146
chr12	27825208	27825469
chr12	28260432	28260833
chr12	29287236	29287416
chr12	29502155	29502589
chr12	29734068	29734274
chr12	29739259	29739585
chr12	29975829	29976008
chr12	30348269	30348472
chr12	30382828	30383227
chr12	30553277	30553471
chr12	30567792	30567997
chr12	30639378	30639731
chr12	30721687	30721944
chr12	32602239	32602393
chr12	33442345	33442525
chr12	33562844	33563168
chr12	33611329	33611611
chr12	33693192	33693468
chr12	33719749	33719934
chr12	33720252	33721029
chr12	33757222	33757490
chr12	33795807	33796183
chr12	33847436	33847786
chr12	33882336	33882563
chr12	33905313	33905526
chr12	33920649	33921088
chr12	33986992	33987197
chr12	35213741	35213990
chr12	36934120	36934300
chr12	36985407	36985649
chr12	37968467	37968681
chr12	39030459	39030723
chr12	39054464	39054730
chr12	39505215	39505401
chr12	39505959	39506188
chr12	39515283	39515476
chr12	40647304	40647525
chr12	40683028	40683225
chr12	41565626	41565806
chr12	41625109	41625315
chr12	42828257	42828558
chr12	46026862	46027178
chr12	46114355	46114535
chr12	46934612	46934861
chr12	47191168	47191375
chr12	47736321	47736694
chr12	48265359	48265519
chr12	48376820	48377172
chr12	51597002	51597187
chr12	51650825	51651154
chr12	51799925	51800430
chr12	51866606	51866810
chr12	52219010	52219198
chr12	53875405	53875671
chr12	53936202	53936635
chr12	54225377	54225546
chr12	54225731	54225935
chr12	54506890	54507146
chr12	54536836	54537067
chr12	54549084	54549291
chr12	54688735	54689162
chr12	55082622	55083037
chr12	55135766	55136092
chr12	55388014	55388488
chr12	55511259	55511469
chr12	56490932	56491163
chr12	56547764	56548003
chr12	56721369	56721534
chr12	57883744	57884086
chr12	58567594	58567939
chr12	65330767	65330971
chr12	66003634	66003835
chr12	66514118	66514289
chr12	67741389	67741744
chr12	69564038	69564362
chr12	69793822	69794034
chr12	69950694	69950959
chr12	70602818	70603504
chr12	71954111	71954321
chr12	72395553	72395831
chr12	72499676	72499856
chr12	73044658	73045179
chr12	73055237	73055453
chr12	73340328	73340531
chr12	73375079	73375375
chr12	73467190	73467343
chr12	73534446	73534789
chr12	73539997	73540250
chr12	73830266	73830549
chr12	74342954	74343301
chr12	74471494	74471765
chr12	74510605	74510985
chr12	74517158	74517521
chr12	74774994	74775150
chr12	74855495	74855656
chr12	76409160	76409394
chr12	76658676	76658913
chr12	77174093	77174307
chr12	77996766	77997133
chr12	78362558	78362741
chr12	78647210	78647570
chr12	78840536	78840743
chr12	79200934	79201131
chr12	80781246	80781828
chr12	80852724	80853036
chr12	80980716	80981121
chr12	81012268	81012666
chr12	81071192	81071532
chr12	81163725	81163910
chr12	81328994	81329217
chr12	81331167	81331433
chr12	81480768	81481102
chr12	81646402	81646619
chr12	81847111	81847339
chr12	81934641	81934821
chr12	81945100	81945448
chr12	83173746	83174028
chr12	83376847	83377027
chr12	83387036	83387458
chr12	83513501	83513696
chr12	83516960	83517266
chr12	85350067	85350325
chr12	85522085	85522329
chr12	85527689	85528237
chr12	85558537	85558788
chr12	85828686	85828940
chr12	86253556	86253790
chr12	86535866	86536044
chr12	86542571	86542755
chr12	86691862	86692192
chr12	86707194	86707452
chr12	86865479	86865785
chr12	86961217	86961436
chr12	87141148	87141447
chr12	87151901	87152260
chr12	87154725	87154947
chr12	87341711	87341905
chr12	87993506	87993687
chr12	88000405	88000768
chr12	88111317	88111585
chr12	88122763	88122949
chr12	88142093	88142489
chr12	88143274	88143496
chr12	88157667	88158411
chr12	88165244	88165690
chr12	88191422	88191605
chr12	88235417	88235781
chr12	88813181	88813412
chr12	92154700	92155056
chr12	92846173	92846451
chr12	92922879	92923051
chr12	93185031	93185211
chr12	95662594	95662774
chr12	96785607	96785820
chr12	98600107	98600311
chr12	100249408	100249677
chr12	100458610	100458911
chr12	100544281	100544628
chr12	100574652	100574982
chr12	100578251	100578540
chr12	100757405	100757585
chr12	100909765	100909931
chr12	101543460	101543764
chr12	101546168	101546496
chr12	101556226	101556411
chr12	101563907	101564250
chr12	102224749	102224929
chr12	103736981	103737205
chr12	104449424	104449621
chr12	105831746	105831998
chr12	105889368	105889559
chr12	106203474	106203736
chr12	106765066	106765322
chr12	106790020	106790208
chr12	107137097	107137338
chr12	107211986	107212335
chr12	108754895	108755086
chr12	108788139	108788555
chr12	109493815	109494039
chr12	109504083	109504419
chr12	109634449	109634638
chr12	110276465	110276849
chr12	110323804	110324257
chr12	112247176	112247480
chr12	112276970	112277150
chr12	112381232	112381612
chr12	112712898	112713409
chr12	112919317	112919566
chr12	112929523	112930220
chr12	112931902	112932803
chr12	112963312	112963497
chr12	113089951	113090219
chr12	113091290	113091530
chr12	113696147	113696417
chr12	113911313	113911514
chr12	113952274	113952533
chr12	114251239	114251672
chr12	114270957	114271227
chr12	114378326	114378506
chr12	115427079	115427265
chr12	118345617	118346048
chr12	118408214	118408402
chr12	118865753	118866156
chr12	119033906	119034082
chr12	120402747	120403037
chr13	3522750	3522960
chr13	3781877	3782109
chr13	3793255	3793479
chr13	4742201	4742411
chr13	5301464	5301622
chr13	5591843	5592181
chr13	5728183	5728411
chr13	5862925	5863150
chr13	6250357	6250553
chr13	6306599	6306741
chr13	6530053	6530298
chr13	8848699	8848882
chr13	8855486	8855681
chr13	9795553	9795869
chr13	9938416	9938586
chr13	10636213	10636438
chr13	13573364	13573681
chr13	13574653	13574872
chr13	14893221	14893383
chr13	15418060	15418241
chr13	15716503	15716854
chr13	18372920	18373256
chr13	19726015	19726199
chr13	19775171	19775469
chr13	20004137	20004371
chr13	20104585	20104786
chr13	20133118	20133383
chr13	20299103	20299313
chr13	20320429	20320618
chr13	20324143	20324323
chr13	20446593	20446791
chr13	23853056	23853383
chr13	24141226	24141578
chr13	24717168	24717357
chr13	24981477	24981851
chr13	25037624	25037814
chr13	25830459	25830701
chr13	25842331	25842591
chr13	25842789	25843140
chr13	26211319	26211554
chr13	26246874	26247225
chr13	26667727	26667944
chr13	26668118	26668443
chr13	26748944	26749522
chr13	26791045	26791259
chr13	29025102	29025282
chr13	29462794	29463132
chr13	29490385	29490565
chr13	29673838	29674001
chr13	29702195	29702629
chr13	29851655	29851906
chr13	29898886	29899066
chr13	31757372	31757576
chr13	31805186	31805382
chr13	32100762	32100918
chr13	32110723	32111071
chr13	32271868	32272102
chr13	34108975	34109298
chr13	34188009	34188244
chr13	34240535	34241207
chr13	34336110	34336439
chr13	34341530	34341752
chr13	34370210	34370622
chr13	35437397	35437646
chr13	35545264	35545654
chr13	35593634	35593908
chr13	35595472	35595685
chr13	35762638	35762982
chr13	37606130	37606471
chr13	39615720	39615937
chr13	39723697	39724022
chr13	39999721	39999935
chr13	41085003	41085186
chr13	41435216	41435393
chr13	43106939	43107250
chr13	43626547	43626799
chr13	43779842	43780501
chr13	43902633	43902884
chr13	44114175	44114495
chr13	44196143	44196324
chr13	44301633	44301949
chr13	44597260	44597446
chr13	44847116	44847523
chr13	44963686	44963867
chr13	45003128	45003502
chr13	45565025	45565277
chr13	45624181	45624421
chr13	46268548	46268842
chr13	46445439	46446007
chr13	46612782	46613023
chr13	46715052	46715318
chr13	46823460	46823652
chr13	48419634	48419814
chr13	48733217	48733396
chr13	49090337	49090598
chr13	49111697	49112158
chr13	49227356	49227626
chr13	49274200	49274579
chr13	49448877	49449068
chr13	49531586	49531879
chr13	49801636	49801982
chr13	51711271	51711480
chr13	51941300	51941528
chr13	51941842	51942070
chr13	52329603	52329822
chr13	54381296	54381660
chr13	54419543	54419930
chr13	54441314	54441581
chr13	54445189	54445369
chr13	54513650	54513883
chr13	54526754	54526945
chr13	54539366	54539582
chr13	54710155	54710335
chr13	55272942	55273135
chr13	55472594	55473068
chr13	55566532	55566808
chr13	55571710	55572009
chr13	56550999	56551288
chr13	56683567	56683721
chr13	56749402	56749688
chr13	56779689	56779988
chr13	56784901	56785202
chr13	58796178	58796358
chr13	58869657	58869982
chr13	59244660	59244987
chr13	59758305	59758789
chr13	60012258	60012438
chr13	60027074	60027843
chr13	60028964	60029298
chr13	60152269	60152481
chr13	60159081	60159408
chr13	60449310	60449588
chr13	60521735	60522112
chr13	60715678	60716017
chr13	62957594	62957772
chr13	62981185	62981514
chr13	62999360	62999572
chr13	63134285	63134581
chr13	63362156	63362371
chr13	63380197	63380472
chr13	63437712	63437982
chr13	63653965	63654204
chr13	63655855	63656205
chr13	63793433	63793601
chr13	63843384	63843566
chr13	63980679	63980826
chr13	64002706	64002887
chr13	64020354	64020626
chr13	64087008	64087175
chr13	64122282	64122460
chr13	64182629	64182838
chr13	64361286	64361466
chr13	69168161	69168501
chr13	70072505	70072711
chr13	70123161	70123379
chr13	70824172	70824450
chr13	70858020	70858273
chr13	71009693	71009883
chr13	71022939	71023108
chr13	71512187	71512367
chr13	71645352	71645579
chr13	72461535	72461709
chr13	76335037	76335231
chr13	76662553	76662806
chr13	76678188	76678383
chr13	76949843	76950147
chr13	78567004	78567310
chr13	78837228	78837596
chr13	79077184	79077920
chr13	79138130	79138435
chr13	79904852	79905037
chr13	82198596	82198776
chr13	83871782	83872034
chr13	83881278	83881580
chr13	84137288	84137605
chr13	84588583	84589304
chr13	84710967	84711362
chr13	84752198	84752436
chr13	84903614	84903808
chr13	85913427	85913757
chr13	89734850	89735070
chr13	90124189	90124365
chr13	90275769	90276502
chr13	90534540	90534803
chr13	90782772	90783060
chr13	91311459	91311679
chr13	91504904	91505194
chr13	91510575	91510825
chr13	91893382	91893604
chr13	91964293	91964505
chr13	93354026	93354233
chr13	93473212	93473939
chr13	93899093	93899273
chr13	94609083	94609340
chr13	94948383	94948872
chr13	95334276	95334575
chr13	97430072	97430447
chr13	97698559	97698978
chr13	98007812	98008000
chr13	98517505	98517842
chr13	98526994	98527350
chr13	98534158	98534373
chr13	98546777	98547085
chr13	98681045	98681290
chr13	99870230	99870690
chr13	100000589	100000769
chr13	100214573	100214831
chr13	100564071	100564246
chr13	101759092	101759440
chr13	102571296	102571568
chr13	102927375	102927628
chr13	103002358	103002635
chr13	103307353	103307808
chr13	103343510	103343867
chr13	103483661	103483841
chr13	103488740	103489021
chr13	103580905	103581085
chr13	103885552	103885760
chr13	103904644	103904839
chr13	104711745	104711948
chr13	104938590	104938840
chr13	105077007	105077277
chr13	105289786	105290082
chr13	105763917	105764168
chr13	106202156	106202408
chr13	108008555	108008727
chr13	108189176	108189390
chr13	108432289	108432648
chr13	108490517	108490878
chr13	109856805	109856986
chr13	110050441	110050621
chr13	110083315	110083495
chr13	110334902	110335088
chr13	110929586	110929852
chr13	110935328	110935599
chr13	111050909	111051104
chr13	111137065	111137245
chr13	111324530	111324877
chr13	111348370	111348555
chr13	111433223	111433461
chr13	111433906	111434193
chr13	111537811	111538078
chr13	112026031	112026186
chr13	112076793	112076973
chr13	112082432	112082712
chr13	112726547	112727062
chr13	112734246	112734584
chr13	112891004	112891184
chr13	112909905	112910304
chr13	112950334	112950514
chr13	113512594	113512918
chr13	114145253	114145654
chr13	114345515	114345702
chr13	114377500	114377833
chr13	114636651	114636831
chr13	115628811	115629206
chr13	115713615	115713886
chr13	116477680	116478020
chr14	8658825	8659175
chr14	8733393	8733548
chr14	9162156	9162430
chr14	9474343	9474854
chr14	10432865	10433079
chr14	11359338	11359646
chr14	12707750	12708038
chr14	12994434	12994604
chr14	14484472	14484654
chr14	15432152	15432453
chr14	16471551	16471731
chr14	16810872	16811234
chr14	17033547	17033912
chr14	17105709	17105908
chr14	17111787	17112049
chr14	17566176	17566390
chr14	17651329	17651618
chr14	17837760	17838021
chr14	18005535	18005709
chr14	20528451	20528631
chr14	20724797	20725207
chr14	22072635	22072894
chr14	22188412	22188605
chr14	22526399	22526583
chr14	22642029	22642239
chr14	23872112	23872386
chr14	24668090	24668253
chr14	25052196	25052470
chr14	25370172	25370735
chr14	25398084	25398333
chr14	25436722	25436902
chr14	25463431	25463588
chr14	25598604	25598939
chr14	25626680	25626925
chr14	25928347	25928708
chr14	26046157	26046507
chr14	26137356	26137975
chr14	26191138	26191432
chr14	26197428	26197653
chr14	26198472	26198638
chr14	26369673	26369944
chr14	26544719	26545001
chr14	26558107	26558468
chr14	26559673	26560084
chr14	26585381	26585716
chr14	27858203	27858383
chr14	27879575	27879760
chr14	27979989	27980277
chr14	28526745	28527012
chr14	28870872	28871380
chr14	29349025	29349278
chr14	29853939	29854119
chr14	29969850	29970049
chr14	31354887	31355117
chr14	31508745	31509032
chr14	31717675	31717919
chr14	31787464	31787658
chr14	32475954	32476150
chr14	32482762	32483283
chr14	33667252	33667577
chr14	34141530	34141732
chr14	34696400	34696614
chr14	35887840	35888117
chr14	37816611	37817121
chr14	37819001	37819401
chr14	37826848	37827212
chr14	37845813	37846027
chr14	41769207	41770045
chr14	45945224	45945464
chr14	45984387	45984567
chr14	47609383	47609715
chr14	48425573	48425753
chr14	48556593	48557272
chr14	48632144	48632361
chr14	48671657	48671918
chr14	48817944	48818131
chr14	49550668	49551008
chr14	49846640	49846966
chr14	50391157	50391380
chr14	51819859	51820049
chr14	52723810	52724066
chr14	54710940	54711229
chr14	54952097	54952508
chr14	55673914	55674148
chr14	55842073	55842411
chr14	55955276	55955471
chr14	57190761	57190995
chr14	57934985	57935236
chr14	58128522	58128818
chr14	58154643	58154861
chr14	58540643	58540953
chr14	60233010	60233343
chr14	60340938	60341133
chr14	60923708	60924036
chr14	61017792	61018064
chr14	61147954	61148203
chr14	61262071	61262271
chr14	61301568	61301772
chr14	61774174	61774331
chr14	61949506	61949877
chr14	62622268	62622529
chr14	62994664	62994908
chr14	63035040	63035241
chr14	63035758	63035974
chr14	63098276	63098610
chr14	63256983	63257213
chr14	63796817	63797000
chr14	64079629	64080000
chr14	64426008	64426321
chr14	65568595	65568853
chr14	65737061	65737261
chr14	65759104	65759365
chr14	65864281	65864594
chr14	67060681	67060900
chr14	67466510	67466690
chr14	67735205	67735426
chr14	67920720	67920900
chr14	67963618	67963885
chr14	69552967	69553177
chr14	69675517	69675729
chr14	70039239	70039391
chr14	70440779	70440959
chr14	71400941	71401146
chr14	71446823	71447181
chr14	73637595	73637843
chr14	73903068	73903260
chr14	74032302	74032966
chr14	75251789	75251969
chr14	75927288	75927508
chr14	76263582	76263784
chr14	76433320	76433500
chr14	76654804	76655324
chr14	76731443	76731627
chr14	77282534	77282719
chr14	77908023	77908203
chr14	78138772	78138996
chr14	78226019	78226243
chr14	78783032	78783500
chr14	79557510	79557838
chr14	79600708	79600965
chr14	79603368	79603586
chr14	79606113	79606324
chr14	87148728	87149047
chr14	93466302	93466530
chr14	93466670	93467147
chr14	93750360	93750492
chr14	93942913	93943124
chr14	94184291	94184521
chr14	99209803	99210218
chr14	100343614	100343848
chr14	100858301	100858593
chr14	101148993	101149328
chr14	101149404	101149597
chr14	101541529	101541679
chr14	101628343	101628605
chr14	101703850	101704115
chr14	101726710	101727011
chr14	101893359	101893651
chr14	103955794	103956182
chr14	104163343	104163614
chr14	104177433	104177680
chr14	104298464	104298673
chr14	104736039	104736374
chr14	104936990	104937317
chr14	105882252	105882984
chr14	106030257	106030640
chr14	106030926	106031096
chr14	106132369	106132541
chr14	106140234	106140458
chr14	106250578	106250943
chr14	106379086	106379419
chr14	111652480	111652681
chr14	118080503	118080692
chr14	118629429	118630029
chr14	118821683	118822024
chr14	119034738	119034902
chr14	119134393	119134727
chr14	120365222	120365438
chr14	121481608	121481788
chr14	123357212	123357525
chr14	123381886	123382080
chr14	123695372	123695552
chr15	3182434	3182720
chr15	3188140	3188339
chr15	3292276	3292527
chr15	7065785	7066169
chr15	7068881	7069143
chr15	7144818	7145302
chr15	7148905	7149085
chr15	8609565	8610050
chr15	8613878	8614071
chr15	8656098	8656240
chr15	8731192	8731445
chr15	8846360	8846698
chr15	10585058	10585244
chr15	10820029	10820202
chr15	10994426	10994610
chr15	11028213	11028393
chr15	11044530	11044841
chr15	11095717	11095941
chr15	11103749	11104078
chr15	11109487	11109911
chr15	11996313	11996712
chr15	12295642	12296206
chr15	13322906	13323265
chr15	24957032	24957211
chr15	25572455	25572685
chr15	25606045	25606291
chr15	25687686	25687965
chr15	25691641	25691974
chr15	26531568	26531797
chr15	26691496	26691722
chr15	26803317	26803506
chr15	27176260	27176448
chr15	27425762	27426228
chr15	27980884	27981294
chr15	29034469	29034693
chr15	30103181	30103540
chr15	30214611	30215055
chr15	30623603	30623783
chr15	31932796	31933082
chr15	34754318	34754580
chr15	35443424	35443653
chr15	35858289	35858566
chr15	36672631	36672891
chr15	36685105	36685285
chr15	36983015	36983193
chr15	37301782	37302065
chr15	37304127	37304302
chr15	37357608	37358338
chr15	37363147	37363341
chr15	37437019	37437200
chr15	37572769	37572974
chr15	38026203	38026463
chr15	38228804	38228991
chr15	38232008	38232248
chr15	38531913	38532247
chr15	38770185	38770423
chr15	42156816	42157105
chr15	44026594	44026774
chr15	45098456	45098660
chr15	50529779	50529958
chr15	51541958	51542201
chr15	51599619	51599803
chr15	52895205	52895395
chr15	53055845	53056032
chr15	53453071	53453363
chr15	54767221	54767374
chr15	54994224	54994466
chr15	55696181	55696361
chr15	55784404	55784648
chr15	56252309	56252515
chr15	57812293	57812497
chr15	58788438	58788848
chr15	58807895	58808480
chr15	58819431	58819809
chr15	58872311	58872576
chr15	58886508	58886737
chr15	58985926	58986513
chr15	59005700	59006205
chr15	59019769	59020293
chr15	59029354	59029543
chr15	59399463	59399672
chr15	59465595	59465774
chr15	59479064	59479323
chr15	59565668	59565817
chr15	60464538	60464866
chr15	60735668	60736080
chr15	60799935	60800149
chr15	61226893	61227072
chr15	61910678	61911248
chr15	61924372	61924582
chr15	61936397	61936577
chr15	61938174	61938434
chr15	62041507	62041913
chr15	62044029	62044258
chr15	62116248	62116425
chr15	62397573	62397906
chr15	62734525	62735074
chr15	62911363	62911628
chr15	63913886	63914137
chr15	63974423	63974692
chr15	64421738	64421974
chr15	65367284	65367464
chr15	65971638	65971832
chr15	66156039	66156219
chr15	67657545	67657746
chr15	67778802	67778982
chr15	67903055	67903262
chr15	67903967	67904239
chr15	69173267	69173456
chr15	72722449	72722717
chr15	72727520	72727723
chr15	72834433	72834680
chr15	73263237	73263458
chr15	73277349	73277681
chr15	73450997	73451220
chr15	73498659	73498867
chr15	73697231	73697384
chr15	73728109	73728550
chr15	74366372	74366550
chr15	75464488	75464723
chr15	75907448	75907702
chr15	75970540	75970782
chr15	76885372	76885577
chr15	77207444	77207695
chr15	77640886	77641137
chr15	77646366	77646564
chr15	77650678	77650896
chr15	78012249	78012429
chr15	78214339	78214491
chr15	78455037	78455278
chr15	78507629	78507847
chr15	78665844	78666031
chr15	78819012	78819290
chr15	78928071	78928254
chr15	79023290	79023912
chr15	79154015	79154248
chr15	79222279	79222493
chr15	79263410	79263586
chr15	79791697	79791959
chr15	80231978	80232149
chr15	81094806	81095097
chr15	81670093	81670353
chr15	81710338	81710600
chr15	81758713	81758953
chr15	81965988	81966294
chr15	81977470	81977696
chr15	83902823	83903013
chr15	84242905	84243091
chr15	84244751	84244931
chr15	84248366	84248681
chr15	84297243	84297674
chr15	84362001	84362220
chr15	84452451	84452790
chr15	84528020	84528479
chr15	84560082	84560264
chr15	84803723	84804237
chr15	84865960	84866140
chr15	84872944	84873285
chr15	85291932	85292283
chr15	85443911	85444251
chr15	85486205	85486472
chr15	85836204	85836438
chr15	86018577	86019064
chr15	86087169	86087349
chr15	86250134	86250461
chr15	87397129	87397309
chr15	87414728	87414969
chr15	87545803	87546010
chr15	87617563	87617755
chr15	88669739	88669972
chr15	88809307	88809749
chr15	90163790	90164134
chr15	90252701	90252881
chr15	90265804	90266032
chr15	90849038	90849366
chr15	90880607	90880851
chr15	90886654	90886876
chr15	90908452	90908754
chr15	91533703	91534127
chr15	92425299	92425576
chr15	92636626	92636864
chr15	92893247	92893532
chr15	95497643	95497855
chr15	95587671	95587872
chr15	95659085	95659498
chr15	95736854	95737034
chr15	95762895	95763075
chr15	95965613	95965856
chr15	96378387	96378672
chr15	97417726	97418031
chr15	97502714	97503033
chr15	97642745	97642904
chr15	98799441	98799677
chr15	99173887	99174188
chr15	99250980	99251221
chr15	99535390	99535650
chr15	99554008	99554513
chr15	99618446	99618602
chr15	99638300	99638540
chr15	99973787	99974159
chr15	101107845	101108170
chr15	101934718	101934898
chr15	102377161	102377391
chr15	102516375	102516553
chr16	4139269	4139457
chr16	5912111	5912407
chr16	8523930	8524163
chr16	8541013	8541307
chr16	8566312	8566560
chr16	10452662	10452940
chr16	11012694	11013066
chr16	11021836	11022025
chr16	11369669	11369980
chr16	11599752	11600003
chr16	11671148	11671328
chr16	12884763	12884983
chr16	12886232	12886425
chr16	12901729	12902214
chr16	13330372	13330677
chr16	14444368	14444606
chr16	16498961	16499141
chr16	16560178	16560615
chr16	16911981	16912262
chr16	17254444	17254643
chr16	17916859	17917104
chr16	18160700	18160929
chr16	18316575	18316804
chr16	18396365	18396545
chr16	18400984	18401219
chr16	20535271	20535511
chr16	20700212	20700500
chr16	21204539	21204756
chr16	21339770	21340054
chr16	21398503	21398771
chr16	21611664	21611845
chr16	21643969	21644149
chr16	22428926	22429236
chr16	22440573	22440762
chr16	22509145	22509577
chr16	22517731	22518015
chr16	22527576	22528014
chr16	22720053	22720242
chr16	22800542	22800726
chr16	22877832	22878432
chr16	24231653	24231901
chr16	25016266	25016829
chr16	25058941	25059197
chr16	25059304	25059502
chr16	25314245	25314406
chr16	25404317	25404582
chr16	25465598	25466165
chr16	28851568	28851819
chr16	29536479	29536724
chr16	29720160	29720537
chr16	30185024	30185384
chr16	30189223	30189491
chr16	30194009	30194197
chr16	30769171	30769607
chr16	30973581	30973889
chr16	31188350	31188649
chr16	31493051	31493395
chr16	31826164	31826406
chr16	32396583	32396796
chr16	32660651	32660997
chr16	33734770	33735031
chr16	33860092	33860307
chr16	33941353	33941760
chr16	34254866	34255147
chr16	34395357	34395558
chr16	34456531	34456736
chr16	35456814	35456997
chr16	35614008	35614440
chr16	35729275	35729617
chr16	36063489	36063680
chr16	37617884	37618121
chr16	37683301	37683652
chr16	37964095	37964275
chr16	37991111	37991369
chr16	38352207	38352383
chr16	38673725	38674016
chr16	38941458	38941696
chr16	38947746	38947979
chr16	39286925	39287131
chr16	39390756	39391023
chr16	39402518	39402809
chr16	39988780	39988972
chr16	40294481	40294707
chr16	43173109	43173360
chr16	43286490	43286807
chr16	43466868	43467048
chr16	44551196	44551440
chr16	44680826	44681134
chr16	45096305	45096515
chr16	45121423	45121603
chr16	45724947	45725127
chr16	45797027	45797314
chr16	46290440	46290602
chr16	49952353	49952553
chr16	50309579	50309808
chr16	51352361	51352569
chr16	51589978	51590579
chr16	53074035	53074252
chr16	55571310	55571585
chr16	63806275	63806614
chr16	64329475	64329805
chr16	65029628	65029871
chr16	65379617	65379914
chr16	66137832	66138418
chr16	66769271	66769560
chr16	67791746	67792030
chr16	70586254	70586466
chr16	70725060	70725270
chr16	72072424	72072595
chr16	72088374	72088573
chr16	72088991	72089458
chr16	72222490	72222622
chr16	72699375	72699572
chr16	72913537	72913717
chr16	73471910	73472303
chr16	74055359	74055554
chr16	74055734	74055982
chr16	74283837	74284110
chr16	74847504	74847698
chr16	77099624	77099861
chr16	77237209	77237519
chr16	77400783	77401179
chr16	77500249	77500417
chr16	77852642	77853016
chr16	78275321	78275581
chr16	78828116	78828296
chr16	81798624	81798809
chr16	84042150	84042587
chr16	84662223	84662635
chr16	85887970	85888328
chr16	86932970	86933227
chr16	88657838	88658109
chr16	89827960	89828293
chr16	90073808	90073967
chr16	90886063	90886300
chr16	91174338	91174548
chr16	91192095	91192453
chr16	91233927	91234176
chr16	91262896	91263439
chr16	91266182	91266672
chr16	91304459	91304933
chr16	91305688	91306468
chr16	91866007	91866205
chr16	92139859	92140090
chr16	92200981	92201248
chr16	92654103	92654327
chr16	93056764	93056958
chr16	93247014	93247453
chr16	93808191	93808769
chr16	94449204	94449512
chr16	94694181	94694533
chr16	94783222	94783576
chr16	96471269	96471453
chr16	96500433	96500929
chr16	96922278	96922549
chr16	97525997	97526263
chr16	97544294	97544586
chr17	3443236	3443416
chr17	4626138	4626669
chr17	5058556	5058736
chr17	5210430	5210640
chr17	5286671	5286921
chr17	5293774	5293954
chr17	5623357	5623564
chr17	5965318	5965589
chr17	5969281	5969577
chr17	6173100	6173288
chr17	7066119	7066407
chr17	7409266	7409461
chr17	7416238	7416484
chr17	7423535	7423715
chr17	7470105	7470335
chr17	7714168	7714405
chr17	7835247	7835472
chr17	8543927	8544284
chr17	9216174	9216374
chr17	9216561	9216949
chr17	9360684	9360934
chr17	9420782	9421042
chr17	9773013	9773370
chr17	9825394	9825574
chr17	9918588	9919182
chr17	9967906	9968395
chr17	9968660	9969050
chr17	10042093	10042249
chr17	10096190	10096370
chr17	10097508	10097927
chr17	10098314	10099341
chr17	10298205	10298395
chr17	10527969	10528491
chr17	10634509	10634749
[truncated: 3,026 more rows]

## Sheet: FOXO3
chr1	3754964	3755051
chr1	4831478	4831561
chr1	4912883	4912976
chr1	4960780	4960895
chr1	5012835	5013301
chr1	5063482	5063564
chr1	5223060	5223158
chr1	6473762	6473880
chr1	7078399	7078585
chr1	7078779	7078909
chr1	7095155	7095252
chr1	9554668	9554844
chr1	9611644	9611741
chr1	9620352	9620575
chr1	9649429	9649510
chr1	9738490	9738614
chr1	9762925	9763100
chr1	9787722	9787804
chr1	10004587	10004756
chr1	10981115	10981310
chr1	11023833	11023918
chr1	11035490	11035585
chr1	12282013	12282138
chr1	12634802	12634972
chr1	12708162	12708256
chr1	12854311	12854393
chr1	12949922	12950010
chr1	13161346	13161482
chr1	13629723	13629886
chr1	13673309	13673391
chr1	13926461	13926543
chr1	13991032	13991190
chr1	14087979	14088229
chr1	14129868	14130076
chr1	14189102	14189254
chr1	14208921	14209067
chr1	14209165	14209258
chr1	16112949	16113031
chr1	16145084	16145186
chr1	16459570	16459718
chr1	16536818	16537007
chr1	17827452	17827583
chr1	18096382	18096578
chr1	18766536	18766661
chr1	19169222	19169337
chr1	19840161	19840250
chr1	19917822	19917935
chr1	20048441	20048635
chr1	20059876	20060035
chr1	20107490	20107733
chr1	20553193	20553273
chr1	20810508	20810630
chr1	20835867	20836045
chr1	20857435	20857953
chr1	20881935	20882026
chr1	20895894	20895988
chr1	20985614	20985768
chr1	21004642	21004757
chr1	21042738	21042947
chr1	21064522	21064671
chr1	21401339	21401459
chr1	21795231	21795345
chr1	21820480	21820567
chr1	22722678	22722760
chr1	23497987	23498064
chr1	23636378	23636472
chr1	23799645	23799829
chr1	23841931	23842013
chr1	24237293	24237575
chr1	24256049	24256173
chr1	25162384	25162507
chr1	25835762	25835844
chr1	25881527	25881609
chr1	25881744	25881807
chr1	25884010	25884142
chr1	25889393	25889480
chr1	25949326	25949492
chr1	30930717	30930849
chr1	30977666	30977771
chr1	33099420	33099597
chr1	33419956	33420096
chr1	33741448	33741541
chr1	34062647	34062850
chr1	34063283	34063446
chr1	34117377	34117464
chr1	34177130	34177212
chr1	34177993	34178075
chr1	34207622	34207917
chr1	34222856	34222965
chr1	34325366	34325526
chr1	34456700	34456782
chr1	34491573	34491672
chr1	34640698	34640966
chr1	34659292	34659472
chr1	34722108	34722344
chr1	34732682	34732847
chr1	34747356	34747514
chr1	34747620	34747702
chr1	34776881	34777047
chr1	34950953	34951128
chr1	35442372	35442481
chr1	35525355	35525493
chr1	35526131	35526415
chr1	35662220	35662323
chr1	35671996	35672096
chr1	35672224	35672327
chr1	35868500	35868547
chr1	35926434	35926693
chr1	35936578	35936666
chr1	36366439	36366696
chr1	36526712	36526794
chr1	36527712	36527811
chr1	36568506	36568714
chr1	36613541	36613649
chr1	36638383	36638465
chr1	36646503	36646605
chr1	36653017	36653214
chr1	36660294	36660476
chr1	36660659	36660770
chr1	36704609	36704751
chr1	36952457	36952540
chr1	36977036	36977249
chr1	37086048	37086207
chr1	37120033	37120164
chr1	37179297	37179480
chr1	37277099	37277280
chr1	37389779	37389890
chr1	37404240	37404365
chr1	37407811	37407900
chr1	37569295	37569539
chr1	37691657	37691739
chr1	37696007	37696089
chr1	37946628	37946716
chr1	37960740	37960822
chr1	37979548	37979642
chr1	38319346	38319490
chr1	38365620	38365723
chr1	38493181	38493272
chr1	38731535	38731618
chr1	38905091	38905291
chr1	38966267	38966355
chr1	39143217	39143462
chr1	39424565	39424717
chr1	39500736	39500830
chr1	39624874	39624958
chr1	39803417	39803499
chr1	39803773	39803855
chr1	39816498	39816605
chr1	39827579	39827661
chr1	39895760	39895997
chr1	39959441	39959525
chr1	39967090	39967194
chr1	39993452	39993622
chr1	39994472	39994554
chr1	39996074	39996235
chr1	39998770	39998992
chr1	39999680	39999890
chr1	40002006	40002088
chr1	40004665	40005040
chr1	40026672	40026785
chr1	40030935	40031028
chr1	40034110	40034182
chr1	40034321	40034493
chr1	40196752	40196999
chr1	40714945	40715030
chr1	40881411	40881605
chr1	41215151	41215266
chr1	41447111	41447226
chr1	41612653	41612780
chr1	41709683	41709765
chr1	42286578	42286847
chr1	42288041	42288214
chr1	42595868	42596291
chr1	42597206	42597437
chr1	42748177	42748278
chr1	42748483	42748804
chr1	42750389	42750534
chr1	42752461	42752674
chr1	42767955	42768143
chr1	42977725	42977844
chr1	42980949	42981032
chr1	43122888	43123056
chr1	43169836	43169972
chr1	43272687	43272831
chr1	43373880	43374202
chr1	43374370	43374449
chr1	43395084	43395166
chr1	43415125	43415221
chr1	43453421	43453533
chr1	43640568	43640696
chr1	43751726	43751823
chr1	43755381	43755614
chr1	43787410	43787570
chr1	43833042	43833173
chr1	43990345	43990573
chr1	44204722	44204789
chr1	44609457	44609578
chr1	45008019	45008100
chr1	45013205	45013295
chr1	45079069	45079210
chr1	45079479	45079587
chr1	45080295	45080436
chr1	45559961	45560097
chr1	45873864	45874023
chr1	45894662	45894802
chr1	46123965	46124182
chr1	46910228	46910366
chr1	46911411	46911534
chr1	50082857	50083027
chr1	50954630	50954803
chr1	51153440	51153561
chr1	51171993	51172126
chr1	51273180	51273380
chr1	51372385	51372632
chr1	51657445	51657527
chr1	51936423	51936528
chr1	52026016	52026236
chr1	52053543	52053790
chr1	52054215	52054351
chr1	52154483	52154579
chr1	52170644	52170726
chr1	52485040	52485194
chr1	52654301	52654417
chr1	52769984	52770066
chr1	53008409	53008573
chr1	53370733	53370815
chr1	53797367	53797471
chr1	53997127	53997307
chr1	54096116	54096199
chr1	54541898	54541994
chr1	54555635	54555717
chr1	54642426	54642655
chr1	54798023	54798101
chr1	54822872	54823074
chr1	55217981	55218424
chr1	55258675	55258823
chr1	55262748	55263037
chr1	55281034	55281168
chr1	55282355	55282461
chr1	55585889	55585982
chr1	55793350	55793430
chr1	57157715	57157805
chr1	57177790	57177872
chr1	57281700	57281776
chr1	57291285	57291367
chr1	57444717	57444894
chr1	57445442	57445524
chr1	57451047	57451129
chr1	57494000	57494092
chr1	57691006	57691087
chr1	57906962	57907051
chr1	57941930	57942158
chr1	57947286	57947367
chr1	58086528	58086647
chr1	58087433	58087698
chr1	58479922	58480030
chr1	58502397	58502504
chr1	58642393	58642461
chr1	58769576	58769659
chr1	58776084	58776243
chr1	59294951	59295033
chr1	59366063	59366271
chr1	59372022	59372104
chr1	59538787	59538869
chr1	59573282	59573401
chr1	59581085	59581349
chr1	59592449	59592627
chr1	59727608	59727698
chr1	59782544	59782626
chr1	59828881	59828967
chr1	59846736	59846871
chr1	59848491	59848575
chr1	59890643	59890845
chr1	60066064	60066169
chr1	60417905	60417983
chr1	61255457	61255644
chr1	61599561	61599656
chr1	61826649	61826786
chr1	61959622	61959724
chr1	62221750	62221928
chr1	62247928	62248022
chr1	62262623	62262723
chr1	62439737	62439821
chr1	62711723	62711897
chr1	62799648	62799853
chr1	62830719	62830801
chr1	62841278	62841368
chr1	62907021	62907103
chr1	62981077	62981159
chr1	62998096	62998183
chr1	63428080	63428162
chr1	63674931	63675013
chr1	63715547	63715623
chr1	63752798	63752915
chr1	63810043	63810175
chr1	63810745	63810887
chr1	63976095	63976166
chr1	64082325	64082407
chr1	64113533	64113768
chr1	64168180	64168402
chr1	64189336	64189520
chr1	64189697	64189913
chr1	64236178	64236322
chr1	64242715	64242950
chr1	64245480	64245562
chr1	64245662	64245776
chr1	64349395	64349543
chr1	64352081	64352532
chr1	64492793	64492875
chr1	64785641	64785723
chr1	64803917	64804125
chr1	64841935	64842059
chr1	64885944	64886012
chr1	64900592	64900665
chr1	65003269	65003386
chr1	65087448	65087566
chr1	65225594	65225681
chr1	65225853	65226031
chr1	66218744	66218865
chr1	66224366	66224507
chr1	66233706	66233913
chr1	66274817	66275096
chr1	66298601	66298864
chr1	66395189	66395273
chr1	66406534	66406638
chr1	66418150	66418324
chr1	66433312	66433611
chr1	66435115	66435308
chr1	66441873	66442147
chr1	66701884	66701988
chr1	66739270	66739352
chr1	66824574	66824713
chr1	66987634	66987735
chr1	67687086	67687169
chr1	68093158	68093240
chr1	68919953	68920041
chr1	69002135	69002274
chr1	69008114	69008210
chr1	69020527	69020643
chr1	69151784	69151894
chr1	69152695	69152820
chr1	69204223	69204317
chr1	69733731	69733813
chr1	69734380	69734586
chr1	69735758	69735835
chr1	69900192	69900320
chr1	70772280	70772372
chr1	72049112	72049282
chr1	72078390	72078505
chr1	72188618	72188760
chr1	72261340	72261456
chr1	72270941	72271058
chr1	72273062	72273215
chr1	72290935	72291038
chr1	72301754	72301872
chr1	72419094	72419199
chr1	72426458	72426582
chr1	72429787	72429946
chr1	72430369	72430530
chr1	72460720	72460810
chr1	72584790	72584921
chr1	72629632	72629829
chr1	72640052	72640191
chr1	72763674	72763774
chr1	72886363	72886445
chr1	72914044	72914126
chr1	72961538	72961642
chr1	73311710	73311923
chr1	73317454	73317656
chr1	73585317	73585404
chr1	73687730	73687865
chr1	73783846	73783957
chr1	73790692	73790844
chr1	73867021	73867280
chr1	73867535	73867643
chr1	73897251	73897340
chr1	73911116	73911242
chr1	73991090	73991313
chr1	74033462	74033531
chr1	74158149	74158316
chr1	74331427	74331523
chr1	74341974	74342118
chr1	74342236	74342727
chr1	74345786	74345868
chr1	74387132	74387261
chr1	74433642	74433828
chr1	74444088	74444180
chr1	74585332	74585564
chr1	74588964	74589516
chr1	74766493	74766580
chr1	74854881	74854971
chr1	75138849	75139056
chr1	75211587	75211698
chr1	75231316	75231403
chr1	75259730	75259868
chr1	75354053	75354206
chr1	75518489	75518726
chr1	75556139	75556239
chr1	75558335	75558554
chr1	75584905	75584987
chr1	75701994	75702162
chr1	75783233	75783345
chr1	75801149	75801318
chr1	76035693	76035858
chr1	76072368	76072487
chr1	76280001	76280085
chr1	76532068	76532225
chr1	76532375	76532481
chr1	76639376	76639586
chr1	76702186	76702256
chr1	76939451	76939702
chr1	77090168	77090314
chr1	77223671	77223777
chr1	77367760	77367854
chr1	77377643	77377791
chr1	77406870	77406952
chr1	77423709	77423791
chr1	77458310	77458395
chr1	77493471	77493685
chr1	77532570	77532757
chr1	77596782	77596882
chr1	78368289	78368462
chr1	78534219	78534520
chr1	78565302	78565344
chr1	78586992	78587439
chr1	78646388	78646497
chr1	78737311	78737611
chr1	78742065	78742391
chr1	78757905	78758087
chr1	78848910	78849115
chr1	78916237	78916343
chr1	79450769	79450857
chr1	79503596	79503745
chr1	79577852	79577964
chr1	79595500	79595680
chr1	79694214	79694299
chr1	79772539	79772668
chr1	79829352	79829804
chr1	79857968	79858096
chr1	80015354	80015448
chr1	80221416	80221871
chr1	80222174	80222256
chr1	80538350	80538455
chr1	80633799	80634052
chr1	80653047	80653187
chr1	80705924	80706022
chr1	80820665	80820806
chr1	81277701	81277978
chr1	81298403	81298551
chr1	81313217	81313293
chr1	81513225	81513317
chr1	81741461	81741565
chr1	81964513	81964594
chr1	82147219	82147718
chr1	82279583	82279734
chr1	82280761	82280932
chr1	82281063	82281145
chr1	82282125	82282236
chr1	82282753	82282841
chr1	82286723	82286863
chr1	82313158	82313245
chr1	82320805	82320961
chr1	82321146	82321276
chr1	82381728	82381876
chr1	82382433	82382539
chr1	82425698	82425780
chr1	82429921	82430151
chr1	82638382	82638484
chr1	82784040	82784150
chr1	82828551	82828694
chr1	83034751	83034918
chr1	83434739	83434840
chr1	83713761	83713843
chr1	84152324	84152457
chr1	84224538	84224669
chr1	84350029	84350111
chr1	84416071	84416211
chr1	84576078	84576172
chr1	84578453	84578599
chr1	84582153	84582235
chr1	84730538	84730617
chr1	84836031	84836145
chr1	84878176	84878359
chr1	85111436	85111569
chr1	87487725	87487808
chr1	87718923	87719005
chr1	87798759	87798841
chr1	87818338	87818467
chr1	87818694	87819348
chr1	87824967	87825169
chr1	87827812	87827930
chr1	87866265	87866389
chr1	87929082	87929434
chr1	87935357	87935439
chr1	87949790	87950517
chr1	87960922	87961004
chr1	88330716	88330828
chr1	88332179	88332297
chr1	88338312	88338398
chr1	88344584	88344770
chr1	88402067	88402273
chr1	88427510	88427606
chr1	88429089	88429134
chr1	88639493	88639607
chr1	88893536	88893640
chr1	88899633	88899715
chr1	88907355	88907465
chr1	88938861	88938967
chr1	89072459	89072541
chr1	89114691	89114799
chr1	89170164	89170262
chr1	89223572	89223670
chr1	89354774	89354892
chr1	89504436	89504544
chr1	89663040	89663105
chr1	89683015	89683131
chr1	89722069	89722118
chr1	89743568	89743784
chr1	89776413	89776681
chr1	89788353	89788505
chr1	90030721	90030849
chr1	90159064	90159130
chr1	90174082	90174204
chr1	90374816	90375045
chr1	90403963	90404064
chr1	90436627	90436709
chr1	90555035	90555131
chr1	90557285	90557367
chr1	90565561	90565643
chr1	90595521	90595582
chr1	90596060	90596166
chr1	90648983	90649204
chr1	90733126	90733208
chr1	90736189	90736280
chr1	90736797	90737004
chr1	90820789	90821056
chr1	90937871	90938124
chr1	90967548	90967653
chr1	91001085	91001280
chr1	91032715	91032848
chr1	91033784	91033966
chr1	91080348	91080491
chr1	91104033	91104144
chr1	91132042	91132214
chr1	91297266	91297544
chr1	91321337	91321463
chr1	91359901	91359983
chr1	91364188	91364267
chr1	91406725	91406862
chr1	91472270	91472377
chr1	91510681	91510846
chr1	91585700	91585783
chr1	91757074	91757234
chr1	91839905	91840007
chr1	92125078	92125160
chr1	92185552	92185648
chr1	92187472	92187571
chr1	92208323	92208479
chr1	92301462	92301558
chr1	92371829	92371946
chr1	92401677	92402300
chr1	92457662	92457816
chr1	92578648	92578732
chr1	92677146	92677234
chr1	92822536	92822802
chr1	92871553	92871820
chr1	92935167	92935350
chr1	92952297	92952431
chr1	92959033	92959209
chr1	93077513	93077619
chr1	93077896	93078158
chr1	93078379	93078502
chr1	93078680	93078944
chr1	93106033	93106195
chr1	93106481	93106633
chr1	93108161	93108268
[truncated: 22,014 more rows]

[truncated: 2 more sheets: CTCF, SMC1A]
