# Supplementary material for: Characterization of the neural stem cell gene regulatory network identifies OLIG2 as a multifunctional regulator of self-renewal
Source: HighWire-hosted journal article supplement (doi:10.1101/gr.173435.114), 2014-10-07
Supplement: TableS5.xlsx [file TableS5.xlsx]

## Sheet: Sheet1
		mm9 co-ordinates			cloning primers
enh type	name	chr	start	end	For	Rev
Active	A1	chr1	90554564	90555608	CCACAAGAAGGGAAGCAAG	GGAAAGTCAGGCAAATGAAC
	A2	chr1	196572821	196573498	GTCTCCATTTCTCCTTTGCCT	TTGACCCCCTGACTGATTTAC
	A3	chr10	86910052	86911331	AAGGTCTCCCCACTGTTCAC	TTAGGGGTCAGGGGTATTTG
	A4	chr14	118628960	118630421	CATTGAGCTCACCTATCTTGTGCC	TTCCCGGGGTGGAGAGGGGAC
	A5	chr14	118629125	118630279	GCGAATGGACACAAGGAAAC	GAGGCAGAGAGAGCACCATC
	A6	chr16	91262687	91263699	ATCCAACGTCTCCAGCTTCT	GTAAATGTGGTGGGAATCGT
	A7	chr16	91303990	91304968	TGATGTTGCCCGACTTATCT	GCACACACCTTCCCTTTCTA
	A8	chr3	34986860	34988498	CGCACCATGGATGTCCACAT	CTGGCTCCTCAGGATGGGCT
	A9	chr3	105388365	105389389	GTCCAGTGAGCAGATGCAG	CCAAAAGTTGCAGACAAAGG
	A10	chr4	108897244	108898473	AAGGGTCTGGAAAGGTCATC	GGAGAGTGAGGCGTGTTCTA
	A11	chr4	124301271	124302344	GGCACCTCCTATTGTTTTTATG	CATGGGTAATGGAGACCAGA
	A12	chr5	141087028	141087711	GTGACCTCCCAGAACCTGAC	CTGCACTGAACTGCCTGAAT
	A13	chr6	91251813	91252406	GAGTCTGCTCTCAAGGCTCA	ATAAAGCCCACAATGGATCA
	A14	chr7	71101613	71102486	TAAGGTCTGAACCCCTGGA	GCTCTCTGCATCCTGACACT
	A15	chr9	62379246	62380119	CCAGGGCTTTACAGAGAAACC	GGGTTGGAGTGAGTTTTTCC
Poised	P1	chr10	39379121	39380350	GAGGAAGGCATAGTCACAGC	ACTGGAGAGGGATTTCAAGC
	P2	chr11	52099946	52100396	ATGTGTTCCAGTGGCCAAG	CCAATTAGCCTAACAACTTCC
	P3	chr18	47962728	47963226	TCTGTTTTGCCTTTGTGTCTAAA	CCATGCTAAATTCCTAGTGAGCA
	P4	chr19	38714201	38714695	AAAGAACTCGGAAGTGGACA	CCATTTGGTCCTGTGAGATG
	P5	chr2	154402999	154403521	AGGCAGAACACTGGGAGAGA	GTGAGAGAGGAAGGTGTAGTGA
	P6	chr8	12429855	12430643	CTCCGCTCTACTCAAGCAAAGAC	AGGATGGATTTCGCTGACCGCTG
