# Supplementary figures and images for: Characterization of the neural stem cell gene regulatory network identifies OLIG2 as a multifunctional regulator of self-renewal
Source: PubMed Central journal article supplement — Genome Res. 2015 Jan;25(1):41–56. doi: 10.1101/gr.173435.114 (PMC4317172; doi:10.1101/gr.173435.114), 2015-01

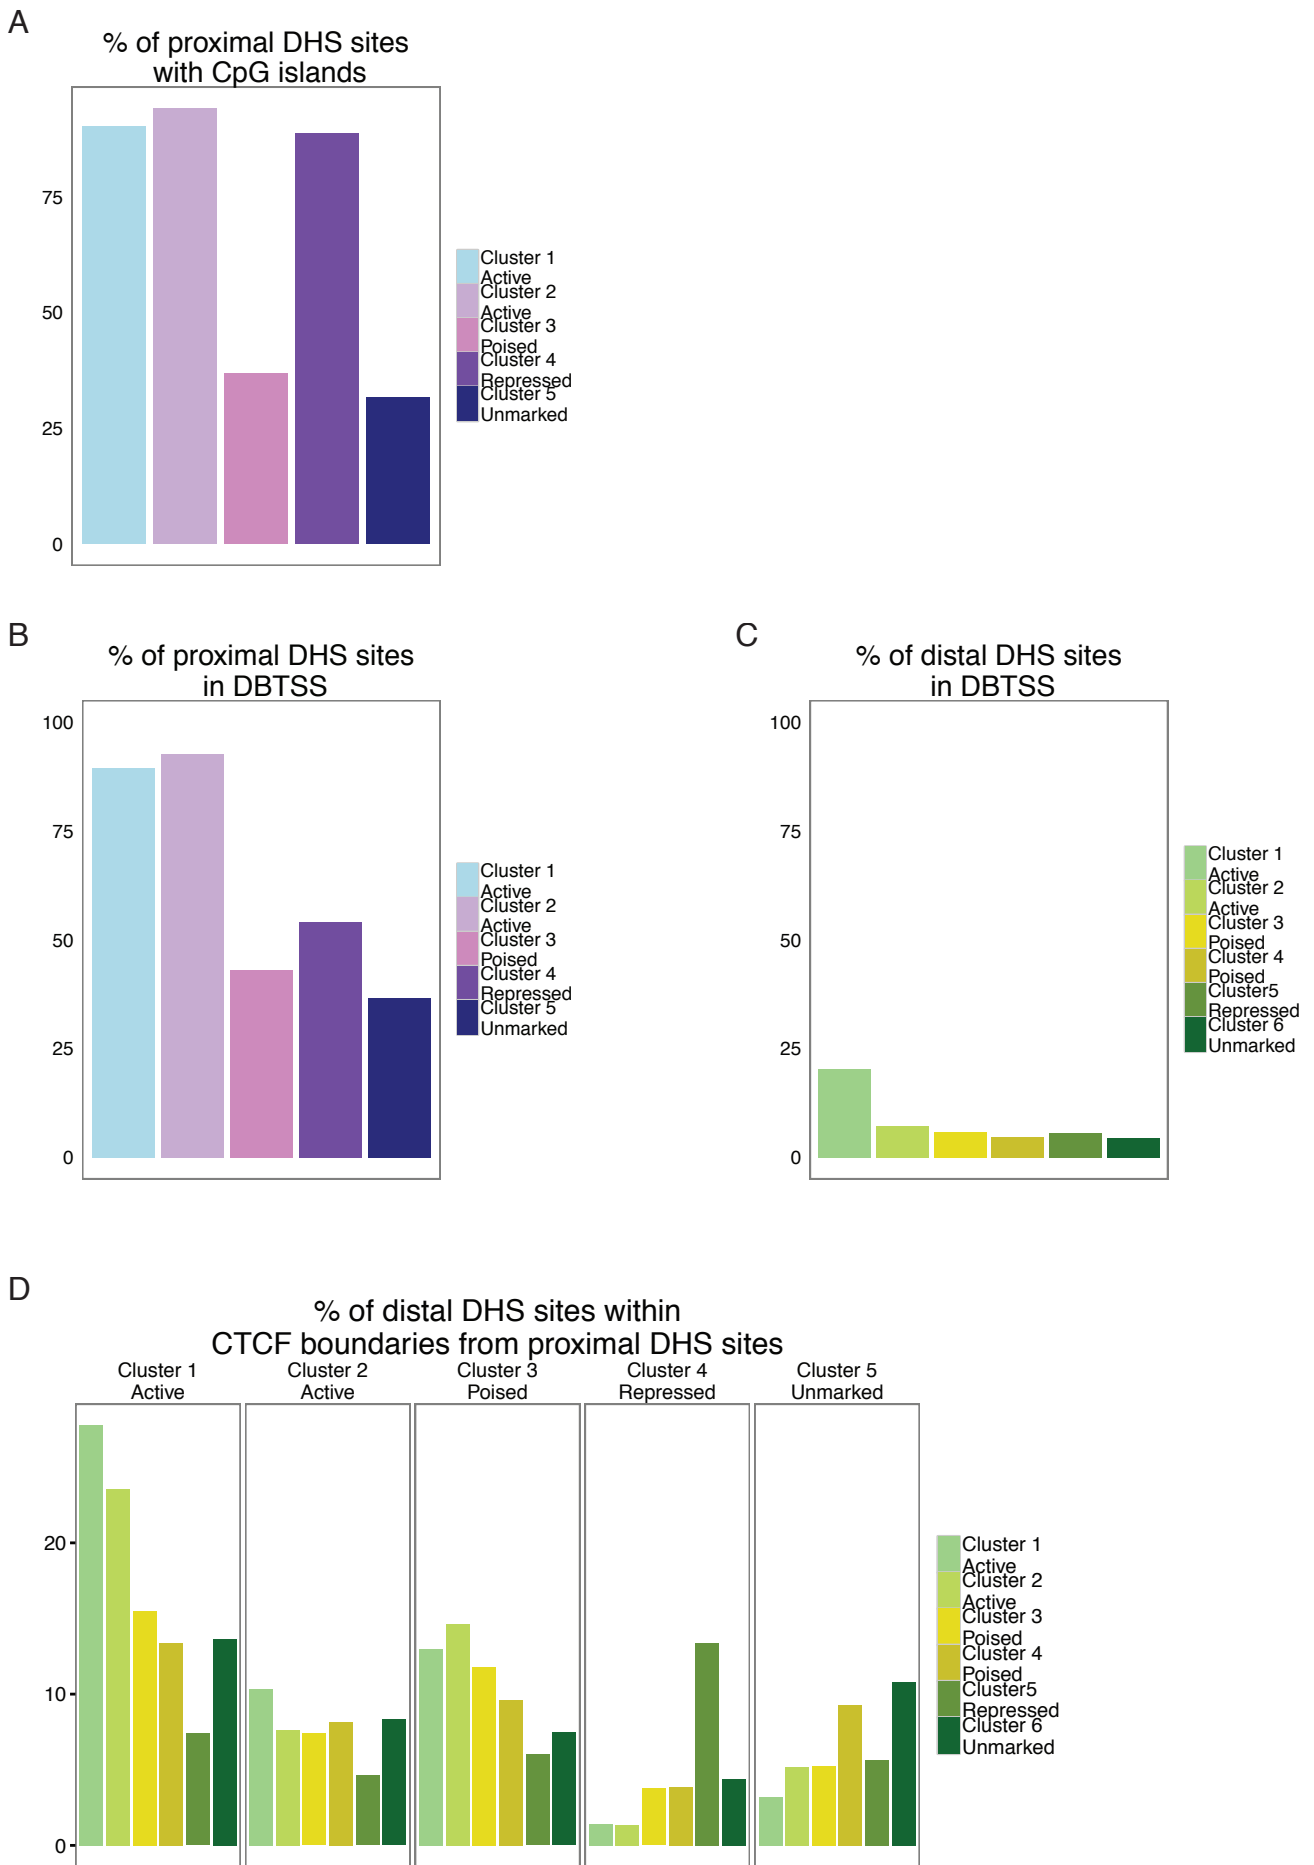

Supplemental Figure 2

Supplement: supp_gr.173435.114_Supp_Fig2.pdf [file supp_gr.173435.114_Supp_Fig2.pdf]

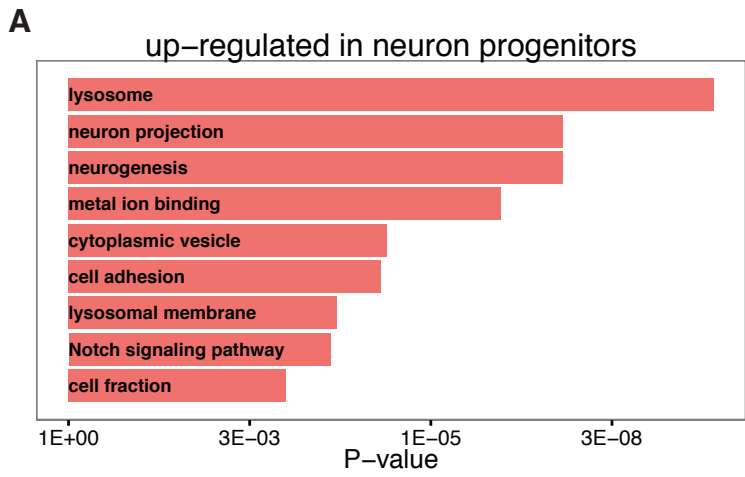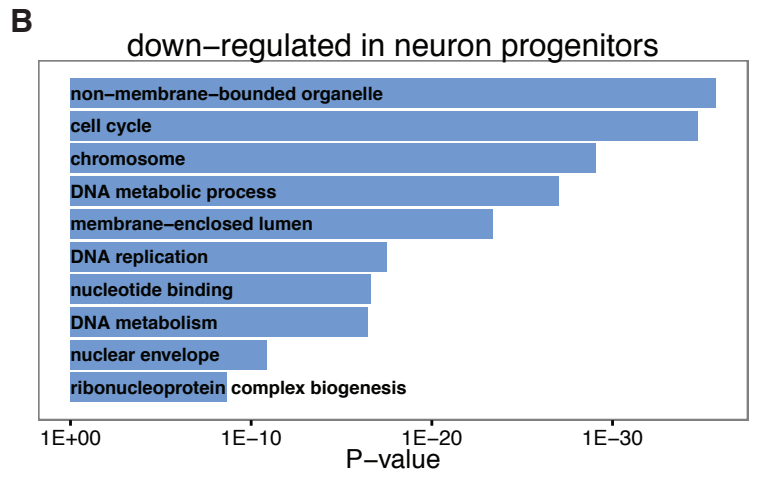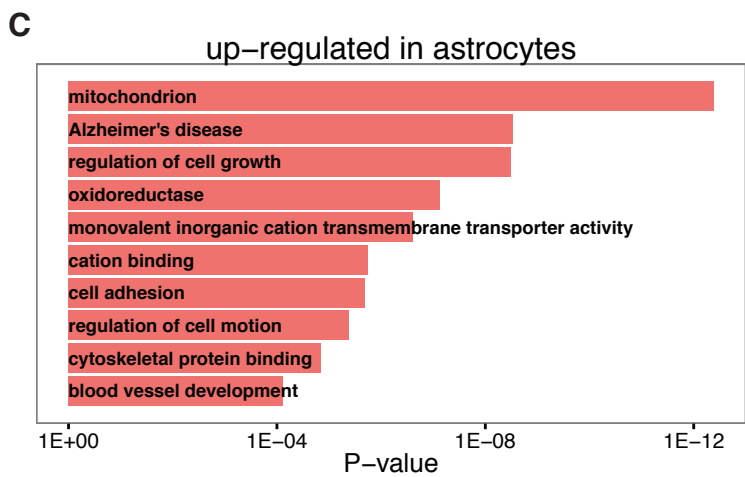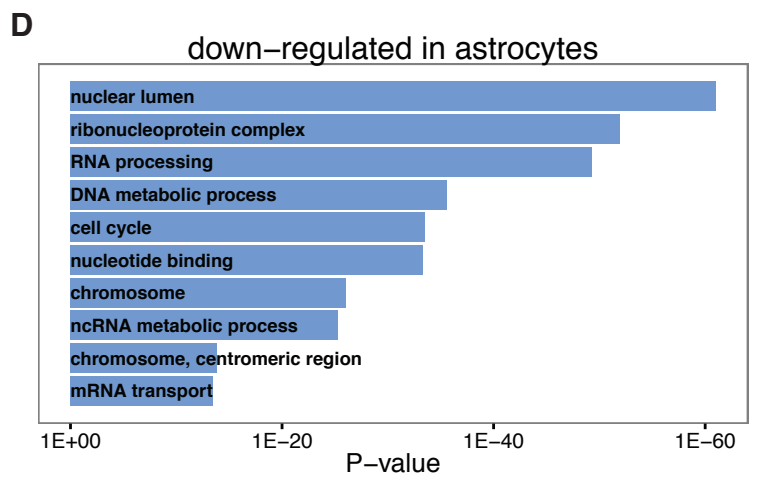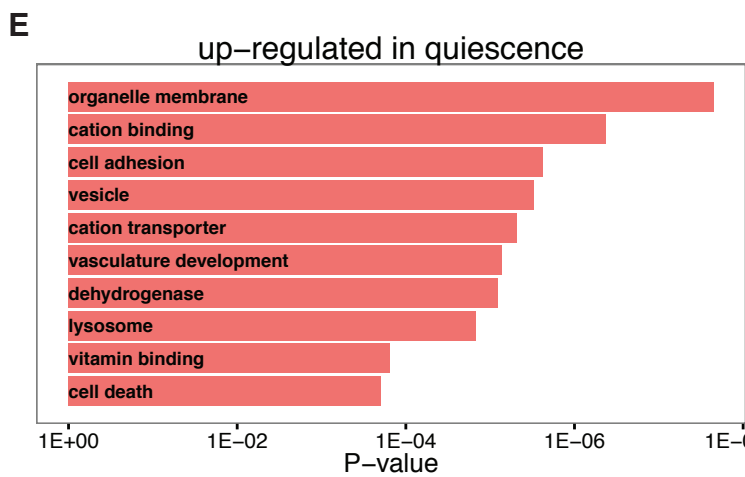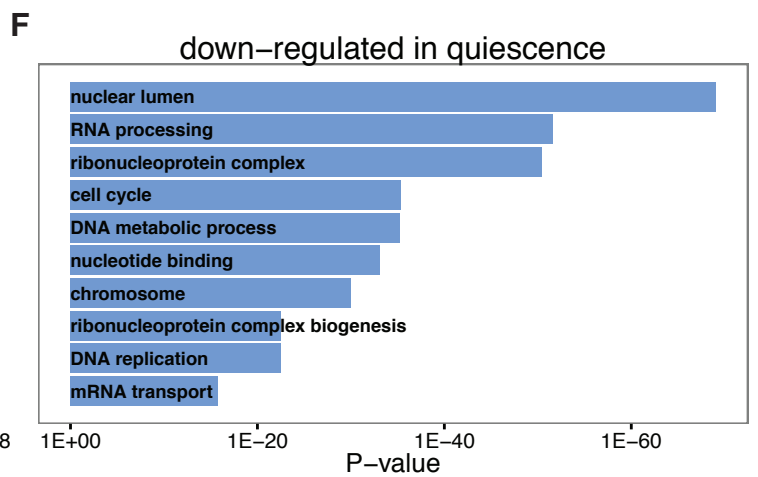

Supplemental Figure 3

Supplement: supp_gr.173435.114_Supp_Fig3.pdf [file supp_gr.173435.114_Supp_Fig3.pdf]

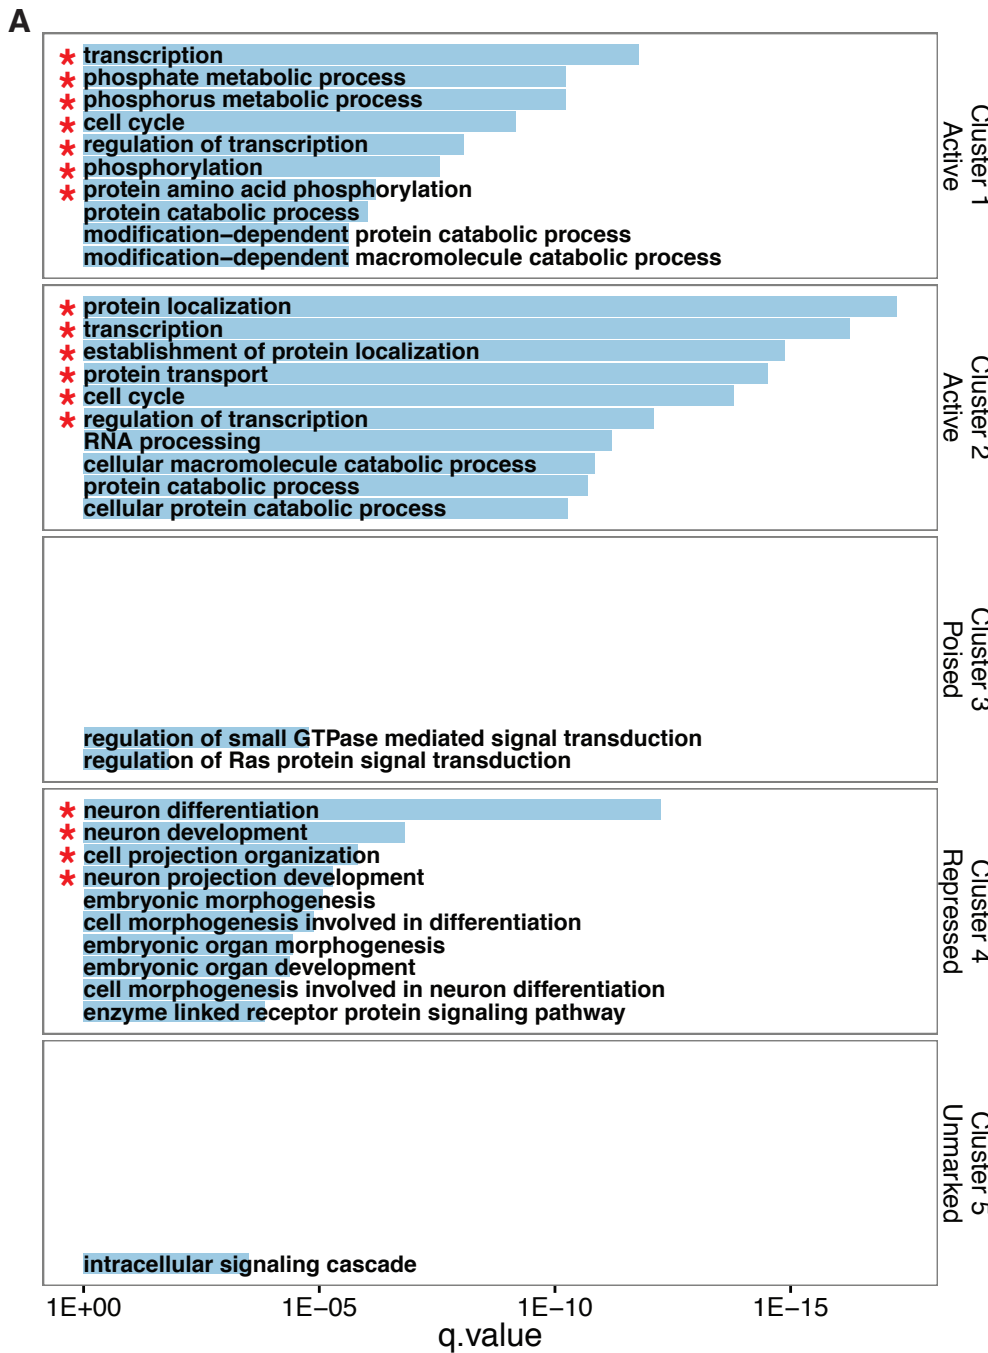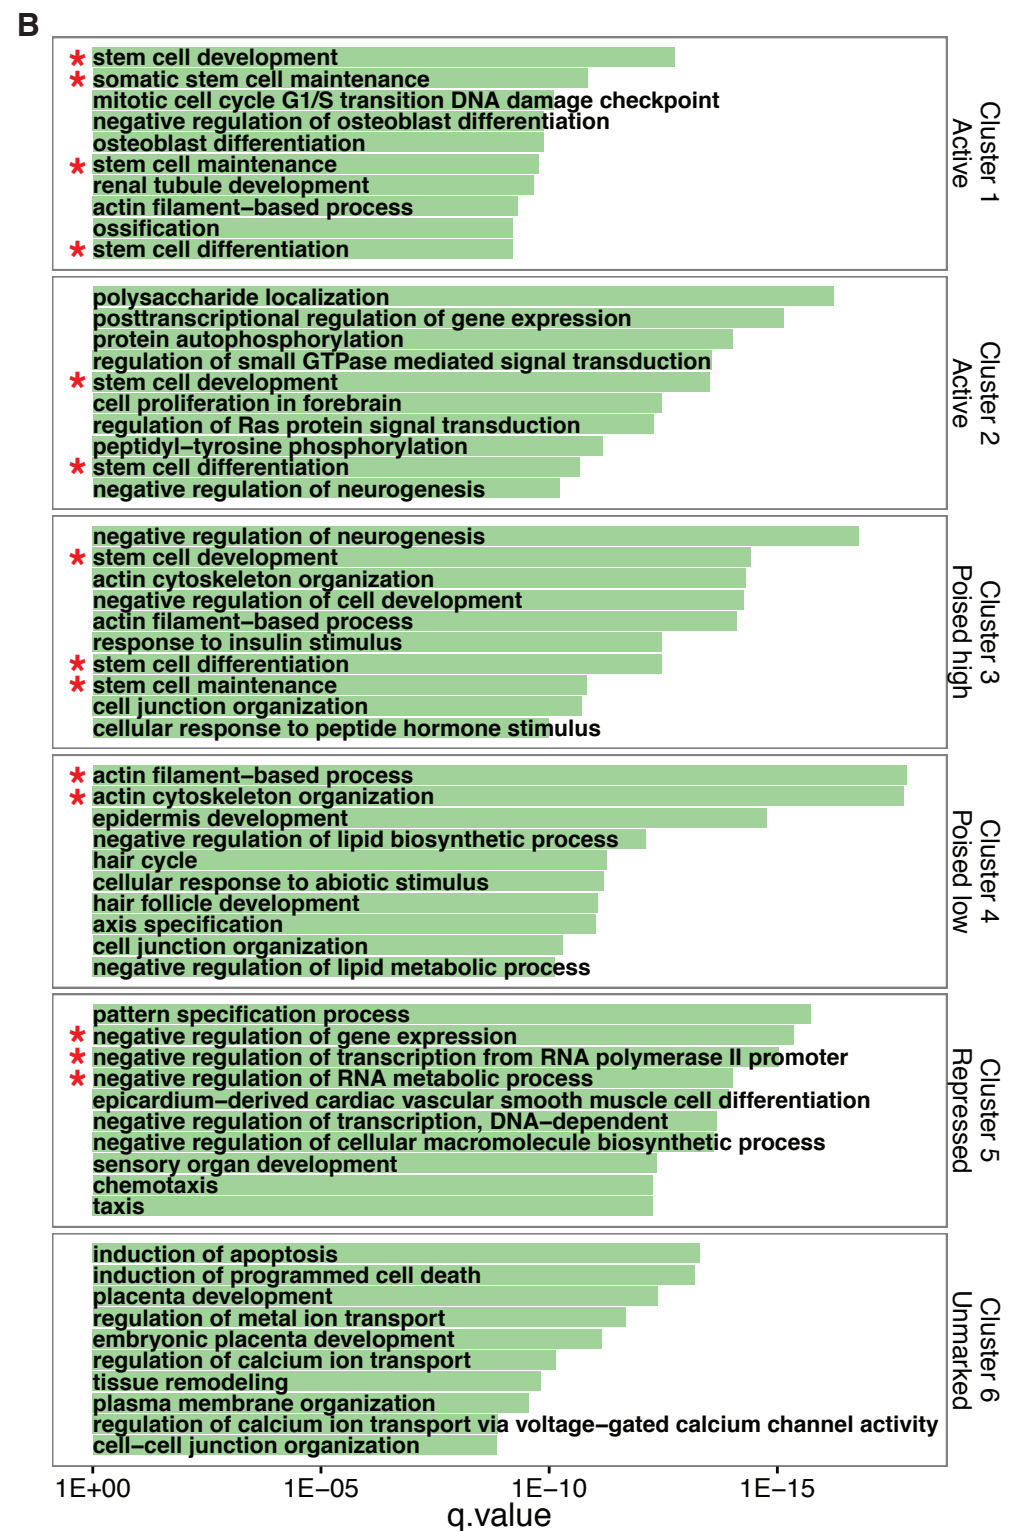

Supplemental Figure 4

Supplement: supp_gr.173435.114_Supp_Fig4.pdf [file supp_gr.173435.114_Supp_Fig4.pdf]

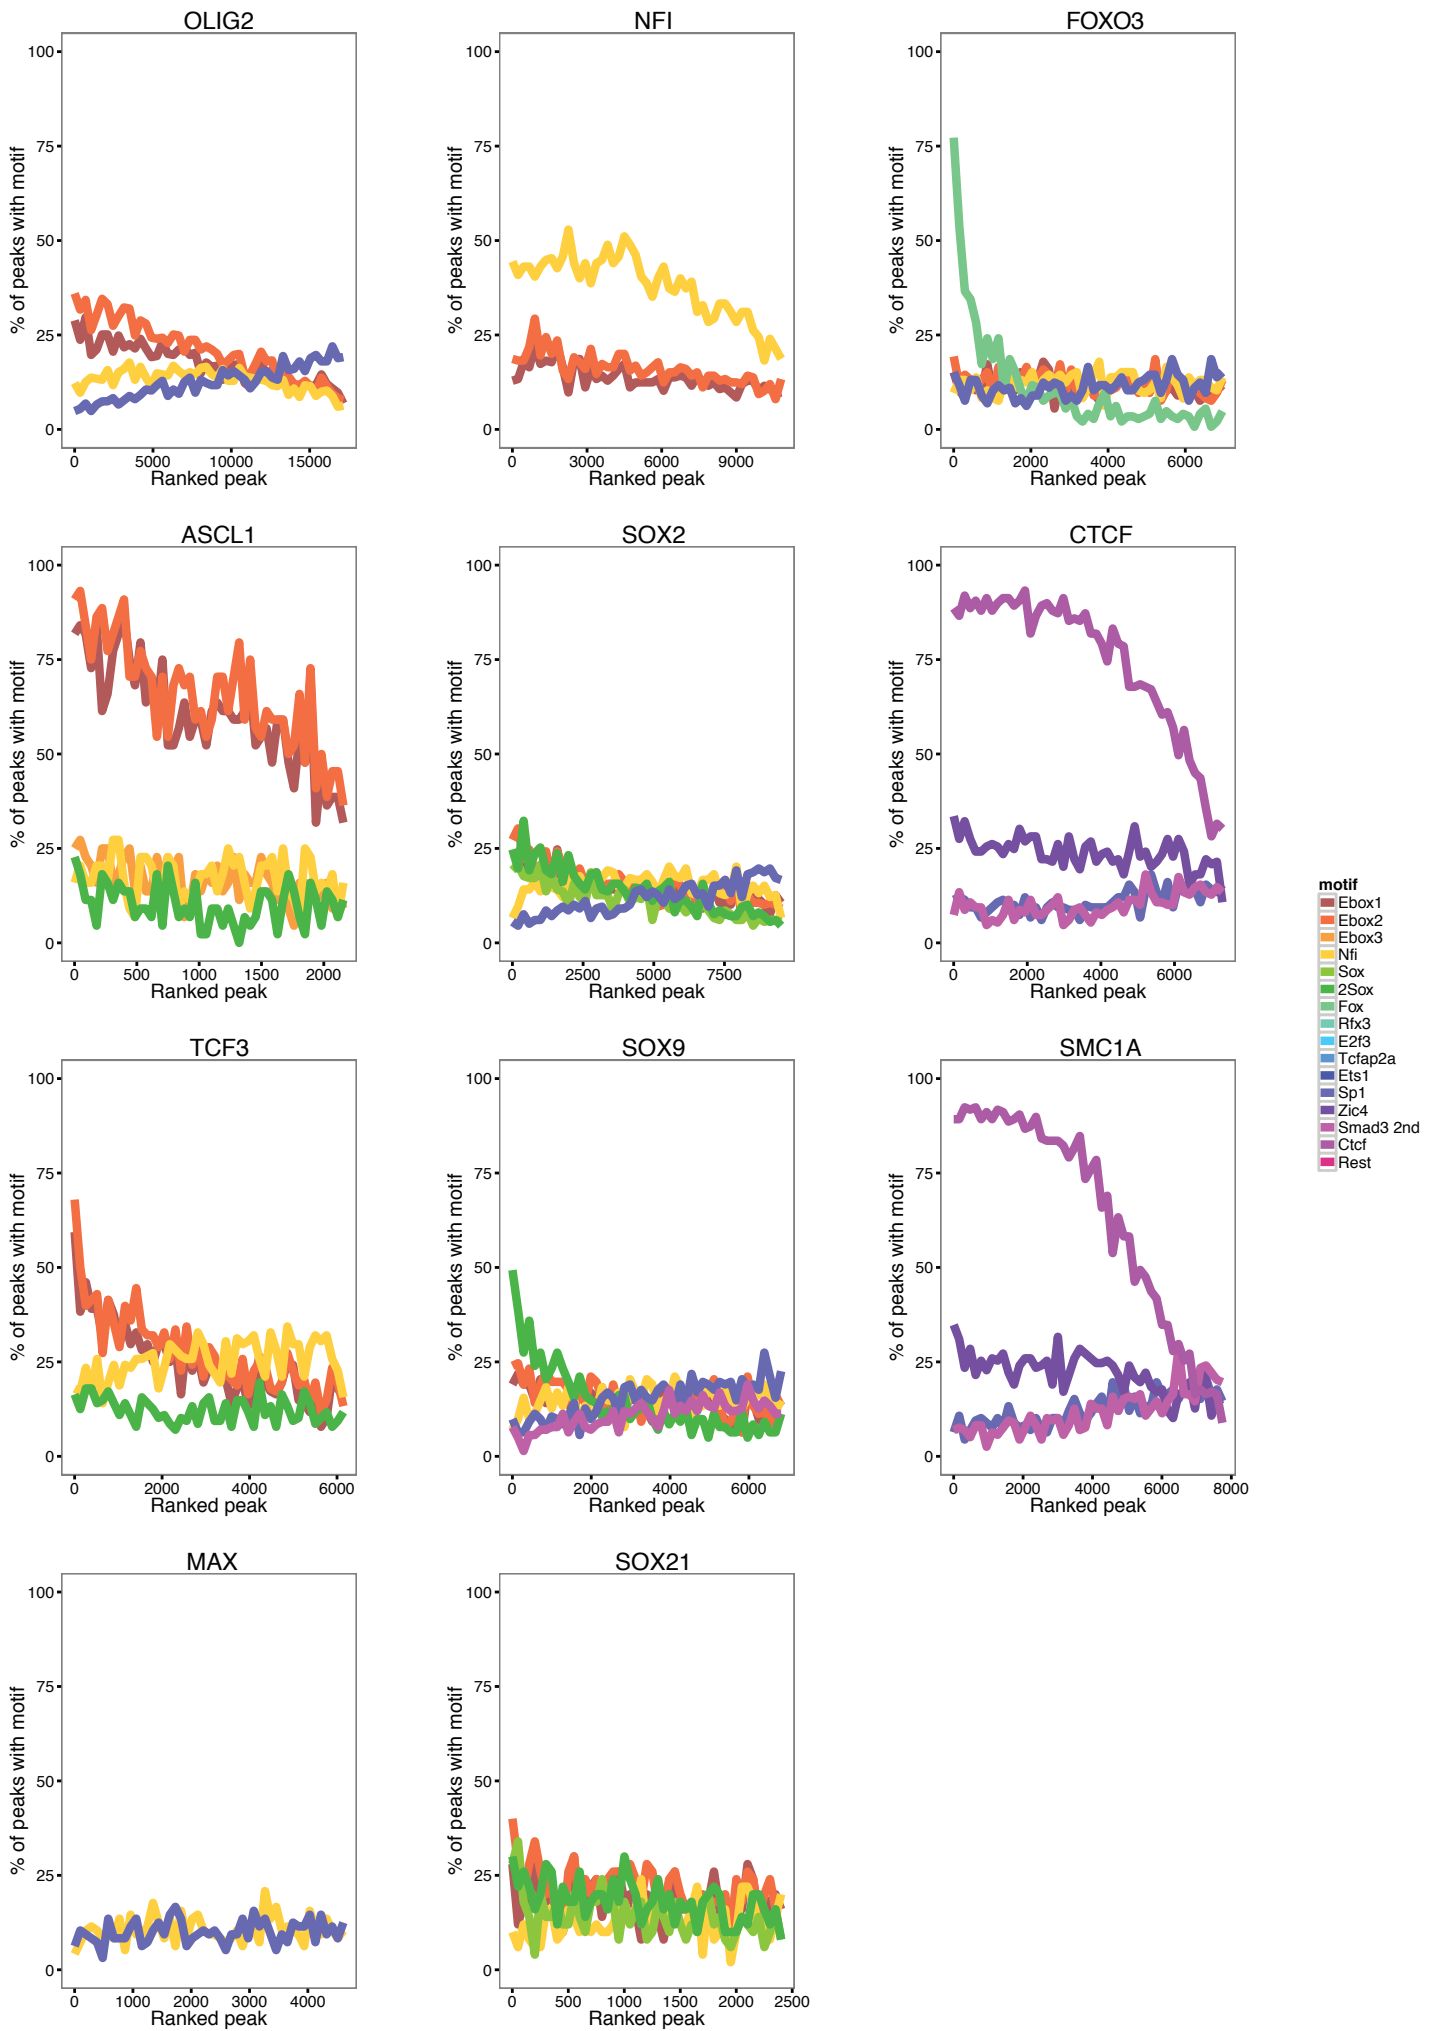

Supplemental Figure 5

Supplement: supp_gr.173435.114_Supp_Fig5.pdf [file supp_gr.173435.114_Supp_Fig5.pdf]

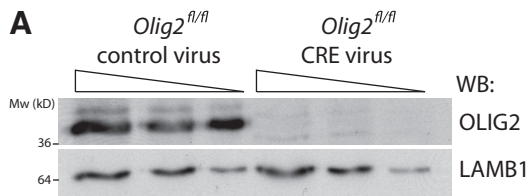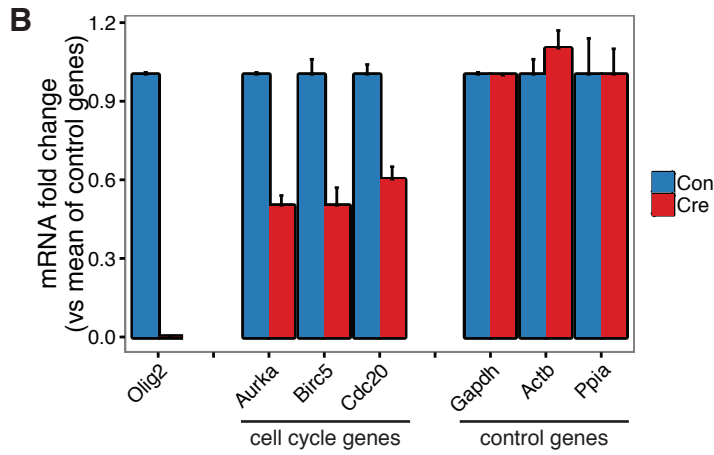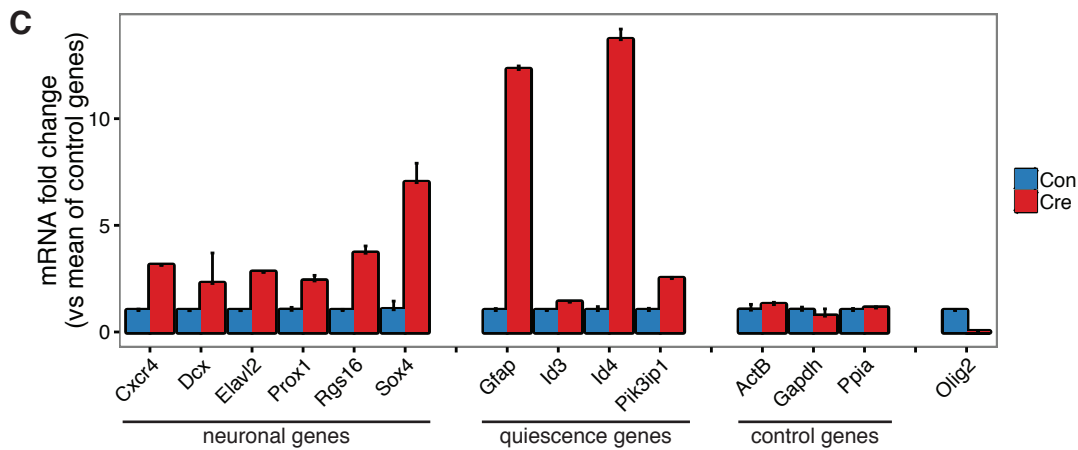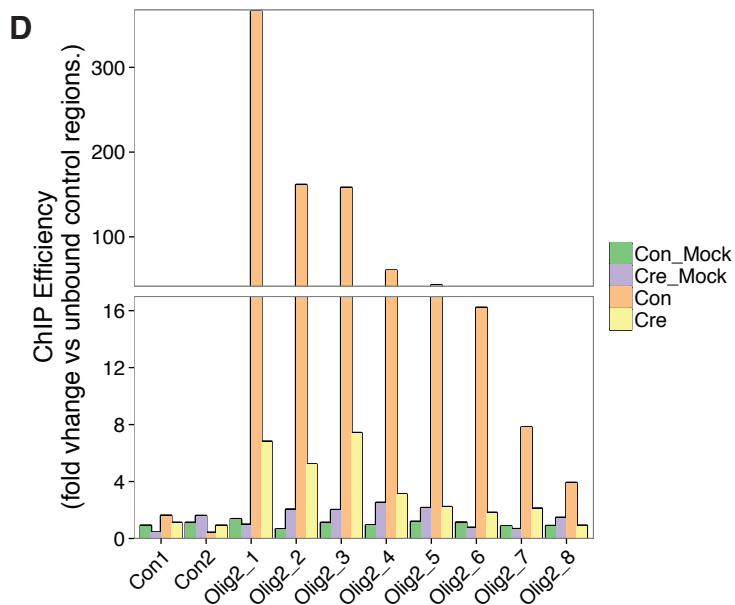

Supplemental Figure 6

Supplement: supp_gr.173435.114_Supp_Fig6.pdf [file supp_gr.173435.114_Supp_Fig6.pdf]
